# Supplementary material
Source: HighWire-hosted journal article supplement (https://jitc.bmj.com/content/8/2/e000875)
Supplement: inline-supplementary-material-6 [file inline-supplementary-material-6.xlsx]

## Sheet: Feuil1
Intensity HLAIp_Patient_1_tumor	Intensity HLAIp_Patient_1_CD14	Intensity HLAIp_Patient_3_tumor	Intensity HLAIp_patient_3_CD14	Intensity HLAIIp_Patient_1_tumor	Intensity HLAIIp_Patient_1_CD14	Intensity HLAIIp_Patient_2_tumor	Intensity HLAIIp_Patient_2_CD14	Length	Mass	PEP	Score	Sequence	Proteins	Leading razor protein	Gene names	Protein names
NaN	NaN	NaN	NaN	NaN	NaN	NaN	NaN	9	657.345	0.024627	100.36	AAAAAAAAA	P17535;O14654;Q8N2M8;Q86U42;Q8WXD9;Q9GZU2;Q9UI36;P58012;Q9H7S9;Q9HAH7;Q9NVR0;Q9NQR1;Q8IXZ3;P56975;Q8TF61;Q7Z570;P37108;Q8NE35;Q9H8N7;O95936;Q9NW07;Q13516;Q2M3V2;O95409;Q8NFJ8;P78426;Q1XH10;A6NHT5;Q9H4Q4;P31271;P0CG40;A6NKL6;P61296;Q8N319;P50458;O95390;Q12947;P41225;Q8N3X6;Q9NQR7;Q99453;Q01851;O60481;Q5VZB9;Q9NQV8;P35453;P50219;Q16676;Q9UJU5;Q8NAP8;Q96SC8;P31277;Q5VYV0;Q9BX70;P78414;P20264;O43435-…	Q96KR1	JUND;IRS4;CLASRP;PABPN1;CASKIN1;PEG3;DACH1;FOXL2;ZNF703;FBRS;KLHL11;SETD8;SP8;NRG3;FBXO41;ZNF804A;SRP14;CPEB3;ZNF395;EOMES;ZNF358;OLIG2;SOWAHA;ZIC2;BHLHE22;NKX6-1;SKIDA1;HMX3;PRDM12;HOXA13;SP9;TMEM200C;HAND2;C6orf223;LHX2;GDF11;FOXF2;SOX3;LCORL;CCDC177;PHOX2B;POU4F1;ZIC3;DMRTA1;PRDM8;HOXD13;MNX1;FOXD1;FOXD3;ZBTB8B;DMRTA2;HOXD11;FOXB2;BTBD2;IRX1;POU3F3;LHFPL3;ASCL1;FEV;PITX3;NKX2-4;NEXN-AS1;TMEM15…	Transcription factor jun-D;Insulin receptor substrate 4;CLK4-associating serine/arginine rich protein;Polyadenylate-binding protein 2;Caskin-1;Paternally-expressed gene 3 protein;Dachshund homolog 1;Forkhead box protein L2;Zinc finger protein 703;Probable fibrosin-1;Kelch-like protein 11;N-lysine methyltransferase SETD8;Transcription factor Sp8;Pro-neuregulin-3, membrane-bound isoform;Neuregulin-…
NaN	NaN	22.8888	NaN	NaN	NaN	NaN	NaN	9	742.409	0.0092885	123.1	AAAAAAAAR	P58107;P47928;P43694;Q9Y651;P43694-2;Q504T8	P58107	EPPK1;ID4;GATA4;SOX21;MIDN	Epiplakin;DNA-binding protein inhibitor ID-4;Transcription factor GATA-4;Transcription factor SOX-21;Midnolin
NaN	NaN	NaN	NaN	NaN	NaN	NaN	NaN	9	749.371	0.032425	94.396	AAAAAAAAY	Q04726;Q04726-3;Q04726-2;Q04726-7;Q04726-6;Q04726-5;Q04726-4;Q9BX46;Q9BX46-5;Q9BX46-2;Q8TAU0;Q04727;Q04727-4;Q04727-3;Q04727-2;P11161;P11161-2;A8MTJ6;O43251;O43251-6;O43251-10;O43251-5;O43251-2;O43251-8;O43251-3	Q04726	TLE3;RBM24;NKX2-3;TLE4;EGR2;FOXI3;RBFOX2	Transducin-like enhancer protein 3;RNA-binding protein 24;Homeobox protein Nkx-2.3;Transducin-like enhancer protein 4;E3 SUMO-protein ligase EGR2;Forkhead box protein I3;RNA binding protein fox-1 homolog 2
23.5825	22.4813	NaN	NaN	NaN	NaN	NaN	NaN	11	992.493	0.064513	84.244	AAAAAAAQSVY	P07203;P07203-2	P07203	GPX1	Glutathione peroxidase 1
NaN	NaN	NaN	NaN	NaN	NaN	NaN	NaN	9	701.371	0.011985	116.87	AAAAAAGSL	Q13207	Q13207	TBX2	T-box transcription factor TBX2
NaN	NaN	20.8234	NaN	NaN	NaN	NaN	NaN	9	841.477	0.11023	64.803	AAAAAALQR	Q6BEB4	Q6BEB4	SP5	Transcription factor Sp5
23.4597	23.0129	NaN	NaN	NaN	NaN	NaN	NaN	10	921.456	0.027726	99.919	AAAAAAQSVY	P07203;P07203-2	P07203	GPX1	Glutathione peroxidase 1
26.2858	20.7905	NaN	NaN	NaN	NaN	NaN	NaN	9	850.418	0.029561	96.51	AAAAAQSVY	P07203;P07203-2	P07203	GPX1	Glutathione peroxidase 1
NaN	NaN	23.6726	NaN	NaN	NaN	NaN	NaN	9	885.467	0.051151	83.206	AAAAAVEQR	Q9H1B7	Q9H1B7	IRF2BPL	Interferon regulatory factor 2-binding protein-like
NaN	NaN	NaN	NaN	NaN	NaN	NaN	NaN	15	1531.81	0.064785	56.482	AAAAFAGLSREEALR	Q96RQ9;Q96RQ9-2	Q96RQ9	IL4I1	L-amino-acid oxidase
NaN	NaN	NaN	NaN	NaN	NaN	NaN	NaN	9	796.456	0.070021	75.311	AAAALPGAR	Q9H4Q3	Q9H4Q3	PRDM13	PR domain zinc finger protein 13
23.102	22.4765	NaN	NaN	NaN	NaN	NaN	NaN	9	889.491	0.022233	102.98	AAAALPTLY	O95319;O95319-5;O95319-2;O95319-4;O95319-3;Q92879;Q92879-4;Q92879-5;Q92879-2;Q92879-3;Q92879-6	O95319	CELF2;CELF1	CUGBP Elav-like family member 2;CUGBP Elav-like family member 1
NaN	NaN	24.6934	NaN	NaN	NaN	NaN	NaN	9	913.546	0.016719	94.85	AAAALSVRR	A6NFY4	A6NFY4	TMEM194B	Transmembrane protein 194B
NaN	NaN	NaN	NaN	NaN	NaN	NaN	NaN	9	796.456	0.040092	88.734	AAAAPRAVA	Q13310;Q13310-2;Q13310-3	Q13310	PABPC4	Polyadenylate-binding protein 4
NaN	NaN	22.3803	NaN	NaN	NaN	NaN	NaN	11	954.488	0.014274	108.57	AAAAPSPGSAR	Q9H3Q1;Q9H3Q1-2	Q9H3Q1	CDC42EP4	Cdc42 effector protein 4
NaN	NaN	25.4386	NaN	NaN	NaN	NaN	NaN	9	865.488	0.0097542	121.29	AAAARPGPR	Q495Z4	Q495Z4	ASB16-AS1	Putative uncharacterized protein ASB16-AS1
NaN	NaN	NaN	23.5321	NaN	NaN	NaN	NaN	9	924.537	0.047096	85.212	AAAARPRGR	Q16787;Q16787-3	Q16787	LAMA3	Laminin subunit alpha-3
NaN	NaN	21.4702	NaN	NaN	NaN	NaN	NaN	9	828.445	0.026194	98.997	AAAAVEAAR	Q15274	Q15274	QPRT	Nicotinate-nucleotide pyrophosphorylase [carboxylating]
NaN	21.8389	NaN	NaN	NaN	NaN	NaN	NaN	9	699.392	0.024627	100.36	AAAAVGGAL	Q9H2X8	Q9H2X8	IFI27L2	Interferon alpha-inducible protein 27-like protein 2
NaN	NaN	NaN	NaN	23.4217	NaN	NaN	NaN	15	1289.71	0.00055024	160.53	AAAAYKAAKAGAGLG	P15502;P15502-5;P15502-2;P15502-4;P15502-8;P15502-7;P15502-6;P15502-12;P15502-13;P15502-1;P15502-10;P15502-9	P15502	ELN	Elastin
NaN	NaN	NaN	NaN	NaN	NaN	NaN	NaN	9	847.429	0.03241	94.407	AAADITSSL	Q9H5I5;Q9H5I5-4;Q9H5I5-3;Q9H5I5-2	Q9H5I5	PIEZO2	Piezo-type mechanosensitive ion channel component 2
24.5966	NaN	NaN	NaN	NaN	NaN	NaN	NaN	9	888.471	0.019448	116.73	AAADPKVAF	Q9UKX7;Q9UKX7-2	Q9UKX7	NUP50	Nuclear pore complex protein Nup50
NaN	22.1795	NaN	NaN	NaN	NaN	NaN	NaN	10	1063.53	0.055789	85.676	AAAEADRTLF	Q9Y580	Q9Y580	RBM7	RNA-binding protein 7
NaN	NaN	22.9146	NaN	NaN	NaN	NaN	NaN	9	999.571	0.038175	90.15	AAAEILKER	Q14558;Q14558-2	Q14558	PRPSAP1	Phosphoribosyl pyrophosphate synthase-associated protein 1
22.0807	NaN	NaN	NaN	NaN	NaN	NaN	NaN	9	971.576	0.035805	100.02	AAAEITRKL	O00567	O00567	NOP56	Nucleolar protein 56
NaN	21.6937	NaN	NaN	NaN	NaN	NaN	NaN	9	962.507	0.1529	58.167	AAAEVLQVY	Q8NI38;Q8NI38-2	Q8NI38	NFKBID	NF-kappa-B inhibitor delta
24.0205	22.3048	NaN	NaN	NaN	NaN	NaN	NaN	15	1391.71	0.0059266	88.948	AAAFGAPGIISASPY	P26599-3	P26599-3	PTBP1	Polypyrimidine tract-binding protein 1
NaN	NaN	NaN	23.611	NaN	NaN	NaN	NaN	9	1067.58	0.029348	96.668	AAAFIYEKR	Q96HP8	Q96HP8	TMEM176A	Transmembrane protein 176A
20.8197	NaN	NaN	NaN	NaN	NaN	NaN	NaN	9	871.419	0.085062	70.912	AAAGGLHEF	Q13085;Q13085-4;Q13085-3;Q13085-2	Q13085	ACACA	Acetyl-CoA carboxylase 1;Biotin carboxylase
NaN	NaN	NaN	NaN	NaN	NaN	NaN	NaN	9	872.378	0.091893	68.915	AAAGHGNEF	Q5T1M5;Q5T1M5-2;Q5T1M5-3	Q5T1M5	FKBP15	FK506-binding protein 15
NaN	NaN	26.6882	NaN	NaN	NaN	NaN	NaN	9	782.44	0.12366	62.714	AAAGLAGPR	Q6ICL3-5	Q6ICL3-5	TANGO2	Transport and Golgi organization protein 2 homolog
NaN	NaN	NaN	NaN	NaN	NaN	NaN	NaN	9	697.376	0.033282	93.763	AAAGPGAAL	Q8WUB8;Q8WUB8-2	Q8WUB8	PHF10	PHD finger protein 10
NaN	NaN	NaN	NaN	NaN	NaN	NaN	NaN	9	783.413	0.072737	74.517	AAAGPGEVL	Q6ZN55;Q6ZN55-2	Q6ZN55	ZNF574	Zinc finger protein 574
NaN	NaN	24.0558	23.137	NaN	NaN	NaN	NaN	8	784.467	0.020718	144.29	AAAGRALR	P21817;P21817-3;P21817-2	P21817	RYR1	Ryanodine receptor 1
NaN	NaN	26.5813	NaN	NaN	NaN	NaN	NaN	9	782.44	0.033142	106.76	AAAGRLAGP	O00358	O00358	FOXE1	Forkhead box protein E1
NaN	NaN	NaN	NaN	NaN	NaN	NaN	NaN	9	779.345	0.016155	109.63	AAAGSGAEF	Q5K4L6;Q5K4L6-3;Q5K4L6-2	Q5K4L6	SLC27A3	Long-chain fatty acid transport protein 3
NaN	NaN	NaN	21.9373	NaN	NaN	NaN	NaN	9	831.449	0.050987	83.287	AAAGSPVFL	O15427;O95907	O15427	SLC16A3;SLC16A8	Monocarboxylate transporter 4;Monocarboxylate transporter 3
NaN	NaN	NaN	NaN	NaN	NaN	NaN	NaN	9	885.503	0.081401	66.073	AAAGTVLQR	Q8IY63;Q8IY63-2	Q8IY63	AMOTL1	Angiomotin-like protein 1
NaN	NaN	22.8552	21.0921	NaN	NaN	NaN	NaN	9	932.544	0.0093119	122.79	AAAGVLLYR	Q5SNT2;Q5SNT2-2	Q5SNT2	TMEM201	Transmembrane protein 201
21.9367	24.8732	NaN	NaN	NaN	NaN	NaN	NaN	9	763.386	0.043613	86.935	AAAGVSAAF	P51798;P51798-2	P51798	CLCN7	H(+)/Cl(-) exchange transporter 7
NaN	NaN	NaN	24.0849	NaN	NaN	NaN	NaN	8	812.523	0.024578	132.72	AAAIKAIR	Q96E11;Q96E11-2;Q96E11-8;Q96E11-3	Q96E11	MRRF	Ribosome-recycling factor, mitochondrial
NaN	NaN	22.8662	21.7985	NaN	NaN	NaN	NaN	9	898.549	0.11053	64.757	AAAIKALEL	Q05086;Q05086-2;Q05086-3	Q05086	UBE3A	Ubiquitin-protein ligase E3A
NaN	NaN	24.8055	NaN	NaN	NaN	NaN	NaN	8	812.523	0.022049	139.92	AAAKALRI	O95793-3;O95793;O95793-2	O95793-3	STAU1	Double-stranded RNA-binding protein Staufen homolog 1
NaN	NaN	24.7625	24.0506	NaN	NaN	NaN	NaN	8	786.435	0.059281	103.29	AAALGTQR	Q9BR26	Q9BR26	OCSTAMP	Osteoclast stimulatory transmembrane protein
NaN	NaN	21.4962	20.7726	NaN	NaN	NaN	NaN	8	739.423	0.082124	92.723	AAANPLAL	Q3L8U1;Q3L8U1-2;Q3L8U1-3	Q3L8U1	CHD9	Chromodomain-helicase-DNA-binding protein 9
NaN	23.7334	NaN	NaN	NaN	NaN	NaN	NaN	9	874.455	0.030533	95.793	AAANPTLAF	Q8TB72;Q8TB72-4;Q8TB72-3;Q8TB72-2	Q8TB72	PUM2	Pumilio homolog 2
NaN	NaN	23.1095	NaN	NaN	NaN	NaN	NaN	9	917.472	0.059419	79.116	AAANPVYGR	P25205;P25205-2	P25205	MCM3	DNA replication licensing factor MCM3
23.6823	22.3515	NaN	NaN	NaN	NaN	NaN	NaN	9	926.53	0.0040668	149.48	AAANVVRNI	P28065;P28065-2	P28065	PSMB9	Proteasome subunit beta type-9
NaN	NaN	NaN	NaN	NaN	NaN	NaN	NaN	9	683.36	0.021495	103.79	AAAPAAAAA	Q15283;Q15283-2;Q4VCS5;Q4VCS5-2	Q4VCS5	RASA2;AMOT	Ras GTPase-activating protein 2;Angiomotin
23.7175	22.3335	NaN	NaN	NaN	NaN	NaN	NaN	9	805.397	0.010799	119.22	AAAPAGTTF	Q9H0Z9	Q9H0Z9	RBM38	RNA-binding protein 38
NaN	NaN	23.1898	NaN	NaN	NaN	NaN	NaN	9	925.546	0.023547	90.15	AAAPAIRTR	Q9GZP8-2	Q9GZP8-2
NaN	NaN	NaN	NaN	NaN	NaN	NaN	NaN	9	803.348	0.0030826	163.84	AAAPASGEM	Q86XL3;Q86XL3-2	Q86XL3	ANKLE2	Ankyrin repeat and LEM domain-containing protein 2
NaN	NaN	NaN	NaN	NaN	NaN	NaN	NaN	9	753.402	0.033512	93.593	AAAPASVPA	P47914;O00303	P47914	RPL29;EIF3F	60S ribosomal protein L29;Eukaryotic translation initiation factor 3 subunit F
NaN	23.3582	NaN	NaN	NaN	NaN	NaN	NaN	9	827.475	0.025812	99.279	AAAPIISSV	Q92562	Q92562	FIG4	Polyphosphoinositide phosphatase
NaN	NaN	NaN	NaN	NaN	NaN	NaN	NaN	9	850.502	0.01334	114.19	AAAPRPGVL	P15502;P15502-5;P15502-2;P15502-4;P15502-8;P15502-7;P15502-6;P15502-12;P15502-13;P15502-1;P15502-10;P15502-9;P15502-11	P15502	ELN	Elastin
NaN	NaN	NaN	NaN	NaN	NaN	NaN	NaN	9	809.465	0.056869	80.377	AAAPVLTPA	Q8N6L1;Q8N6L1-2	Q8N6L1	KRTCAP2	Keratinocyte-associated protein 2
NaN	NaN	NaN	23.176	NaN	NaN	NaN	NaN	8	812.487	0.056007	105.27	AAAQALLR	Q8N9M5	Q8N9M5	TMEM102	Transmembrane protein 102
NaN	NaN	24.5923	NaN	NaN	NaN	NaN	NaN	8	794.451	0.064597	100.07	AAARPGPR	Q495Z4	Q495Z4	ASB16-AS1	Putative uncharacterized protein ASB16-AS1
NaN	NaN	NaN	NaN	NaN	NaN	NaN	NaN	9	917.508	0.0083664	134.3	AAARPKSAF	Q9Y5V3;Q9Y5V3-2	Q9Y5V3	MAGED1	Melanoma-associated antigen D1
NaN	NaN	NaN	23.721	NaN	NaN	NaN	NaN	9	924.537	0.070356	75.213	AAARPRGRA	Q16787;Q16787-3	Q16787	LAMA3	Laminin subunit alpha-3
NaN	NaN	21.3898	22.2837	NaN	NaN	NaN	NaN	9	893.449	0.062695	77.496	AAASESLFV	P04075;P04075-2	P04075	ALDOA	Fructose-bisphosphate aldolase A
NaN	NaN	24.3779	23.5523	NaN	NaN	NaN	NaN	9	891.518	0.017878	107.74	AAASHPLLL	P20591;P20591-2	P20591	MX1	Interferon-induced GTP-binding protein Mx1;Interferon-induced GTP-binding protein Mx1, N-terminally processed
21.3749	23.1453	NaN	NaN	NaN	NaN	NaN	NaN	9	912.576	0.020257	113.14	AAASLIRLV	P42858	P42858	HTT	Huntingtin
NaN	NaN	23.2596	NaN	NaN	NaN	NaN	NaN	9	943.509	0.12364	62.717	AAASLRQDL	O94927	O94927	HAUS5	HAUS augmin-like complex subunit 5
NaN	NaN	23.1094	NaN	NaN	NaN	NaN	NaN	11	998.551	0.0039377	130.75	AAASPIVSGAR	Q9Y2K7;Q9Y2K7-5;Q9Y2K7-4;Q9Y2K7-2;Q9Y2K7-3	Q9Y2K7	KDM2A	Lysine-specific demethylase 2A
23.537	25.5933	NaN	NaN	NaN	NaN	NaN	NaN	9	819.413	0.0093309	122.54	AAASPSAVF	Q9NZV5;Q9NZV5-2	Q9NZV5	SEPN1	Selenoprotein N
NaN	NaN	NaN	NaN	NaN	NaN	NaN	NaN	9	906.492	0.009099	131.22	AAATARVTF	P58107	P58107	EPPK1	Epiplakin
NaN	NaN	NaN	20.4745	NaN	NaN	NaN	NaN	11	1199.63	0.0013693	149.94	AAATDQLVQQR	Q8IYM9;Q8IYM9-2	Q8IYM9	TRIM22	E3 ubiquitin-protein ligase TRIM22
NaN	NaN	NaN	NaN	NaN	NaN	NaN	NaN	9	745.397	0.030533	95.793	AAATGGSVL	Q7L4I2;Q7L4I2-2	Q7L4I2	RSRC2	Arginine/serine-rich coiled-coil protein 2
NaN	NaN	23.5628	NaN	NaN	NaN	NaN	NaN	9	860.497	0.095088	67.981	AAATSVLKT	P24863;P24863-2	P24863	CCNC	Cyclin-C
NaN	NaN	23.4842	NaN	NaN	NaN	NaN	NaN	9	857.472	0.035805	91.9	AAATVAAQR	Q4VCS5;Q4VCS5-2	Q4VCS5	AMOT	Angiomotin
NaN	NaN	23.2666	NaN	NaN	NaN	NaN	NaN	9	828.482	0.035805	91.9	AAATVAVAR	Q96KR1	Q96KR1	ZFR	Zinc finger RNA-binding protein
NaN	22.1047	NaN	NaN	NaN	NaN	NaN	NaN	9	921.481	0.085735	70.716	AAATYILEA	Q9UBI1	Q9UBI1	COMMD3	COMM domain-containing protein 3
NaN	24.0754	NaN	NaN	NaN	NaN	NaN	NaN	9	872.487	0.028802	97.071	AAAVPRAAF	P30040;P30040-2	P30040	ERP29	Endoplasmic reticulum resident protein 29
NaN	NaN	NaN	NaN	27.478	NaN	NaN	NaN	14	1218.67	8.41e-06	147.4	AAAYKAAKAGAGLG	P15502;P15502-5;P15502-2;P15502-4;P15502-8;P15502-7;P15502-6;P15502-12;P15502-13;P15502-1;P15502-10;P15502-9	P15502	ELN	Elastin
NaN	NaN	NaN	NaN	NaN	NaN	NaN	NaN	21	2472.21	0.226	44.816	AACTLMRLCWAWELSDLHLLQ	Q8IXF9	Q8IXF9	AQP12A	Aquaporin-12A
NaN	NaN	21.8224	20.2985	NaN	NaN	NaN	NaN	9	927.455	0.0622	77.741	AADAEPLEI	P55769	P55769	NHP2L1	NHP2-like protein 1;NHP2-like protein 1, N-terminally processed
NaN	NaN	20.9319	21.7798	NaN	NaN	NaN	NaN	9	829.455	0.10735	65.252	AADAVASLL	Q9UBK5;Q9UBK5-2	Q9UBK5	HCST	Hematopoietic cell signal transducer
NaN	NaN	26.6611	23.9165	NaN	NaN	NaN	NaN	9	952.461	0.044548	86.472	AADDHQALI	P61962;P61962-2	P61962	DCAF7	DDB1- and CUL4-associated factor 7
NaN	NaN	NaN	25.7622	NaN	NaN	NaN	NaN	9	922.44	0.052728	82.426	AADDKLSGF	Q96G91	Q96G91	P2RY11	P2Y purinoceptor 11
NaN	NaN	28.4019	22.4543	NaN	NaN	NaN	NaN	9	970.472	0.0094027	121.99	AADDPEVRV	P20827;P20827-2	P20827	EFNA1	Ephrin-A1;Ephrin-A1, secreted form
NaN	NaN	25.2905	NaN	NaN	NaN	NaN	NaN	10	1083.56	0.055617	85.731	AADDPEVRVL	P20827;P20827-2	P20827	EFNA1	Ephrin-A1;Ephrin-A1, secreted form
NaN	NaN	24.2896	22.3511	NaN	NaN	NaN	NaN	11	1165.56	0.04112	115.49	AADDPLVHESL	P08910	P08910	ABHD2	Abhydrolase domain-containing protein 2
NaN	NaN	26.7948	23.9422	NaN	NaN	NaN	NaN	9	904.45	0.036593	91.318	AADDSSVKL	Q9UMS4	Q9UMS4	PRPF19	Pre-mRNA-processing factor 19
NaN	NaN	25.3501	27.1823	NaN	NaN	NaN	NaN	9	967.413	0.014807	111.28	AADDTEISF	Q9UJU6;Q9UJU6-2;Q9UJU6-3;Q9UJU6-5;Q9UJU6-4;Q9UJU6-6	Q9UJU6	DBNL	Drebrin-like protein
NaN	NaN	25.1816	25.6527	NaN	NaN	NaN	NaN	9	981.393	0.017427	108.24	AADEDEVSF	Q14847;Q14847-3	Q14847	LASP1	LIM and SH3 domain protein 1
NaN	NaN	NaN	23.2511	NaN	NaN	NaN	NaN	8	788.355	0.043429	114.02	AADEPSSL	O75381	O75381	PEX14	Peroxisomal membrane protein PEX14
NaN	NaN	23.0317	NaN	NaN	NaN	NaN	NaN	8	800.392	0.086334	90.986	AADEPVTV	Q14118	Q14118	DAG1	Dystroglycan;Alpha-dystroglycan;Beta-dystroglycan
NaN	NaN	24.2107	NaN	NaN	NaN	NaN	NaN	9	913.476	0.015238	110.63	AADEPVTVL	Q14118	Q14118	DAG1	Dystroglycan;Alpha-dystroglycan;Beta-dystroglycan
NaN	NaN	26.1464	25.4983	NaN	NaN	NaN	NaN	8	876.423	0.070317	97.596	AADEPVYI	Q8WVV9;Q8WVV9-5;Q8WVV9-4;Q8WVV9-3;Q8WVV9-2	Q8WVV9	HNRNPLL	Heterogeneous nuclear ribonucleoprotein L-like
NaN	NaN	23.3492	NaN	NaN	NaN	NaN	NaN	9	916.45	0.050805	83.377	AADETAVQL	Q96RT7;Q96RT7-2;Q96RT7-3	Q96RT7	TUBGCP6	Gamma-tubulin complex component 6
NaN	NaN	22.679	22.6656	NaN	NaN	NaN	NaN	9	925.451	0.045328	86.086	AADEVTAHL	Q16656;Q16656-4;Q16656-2	Q16656	NRF1	Nuclear respiratory factor 1
NaN	NaN	26.0367	25.124	NaN	NaN	NaN	NaN	9	1005.46	0.0073011	142.11	AADFEIGHF	P55209;P55209-3;P55209-2	P55209	NAP1L1	Nucleosome assembly protein 1-like 1
NaN	NaN	25.6426	22.3778	NaN	NaN	NaN	NaN	12	1129.61	0.00012041	125.75	AADGGLRASVTL	Q16553	Q16553	LY6E	Lymphocyte antigen 6E
NaN	NaN	27.4837	NaN	NaN	NaN	NaN	NaN	9	814.455	0.1226	62.88	AADGKGVVV	P46779;P46779-2;P46779-3;P46779-5;P46779-4	P46779	RPL28	60S ribosomal protein L28
NaN	NaN	25.3299	NaN	NaN	NaN	NaN	NaN	10	913.523	0.043333	90.601	AADGKGVVVV	P46779;P46779-2;P46779-3;P46779-5;P46779-4	P46779	RPL28	60S ribosomal protein L28
NaN	NaN	24.1995	23.2313	NaN	NaN	NaN	NaN	9	927.575	0.11175	53.493	AADGKLLKL	Q13107;Q13107-2	Q13107	USP4	Ubiquitin carboxyl-terminal hydrolase 4
NaN	NaN	26.5545	22.6832	NaN	NaN	NaN	NaN	9	911.508	0.0093626	122.13	AADGPQKLL	Q92979	Q92979	EMG1	Ribosomal RNA small subunit methyltransferase NEP1
NaN	NaN	22.8538	NaN	NaN	NaN	NaN	NaN	10	946.461	0.080613	77.741	AADGSDTVVL	O14593;O14593-2;O14593-3	O14593	RFXANK	DNA-binding protein RFXANK
NaN	NaN	26.2848	25.1366	NaN	NaN	NaN	NaN	8	825.46	0.074686	95.793	AADIPINI	P21333;P21333-2	P21333	FLNA	Filamin-A
NaN	NaN	24.9543	NaN	NaN	NaN	NaN	NaN	9	1035.51	0.052232	69.812	AADKGHYKF	O75179;O75179-7;O75179-6;O75179-2;Q8IWZ3;Q8IWZ3-6;Q8IWZ3-4	O75179	ANKRD17;ANKHD1	Ankyrin repeat domain-containing protein 17;Ankyrin repeat and KH domain-containing protein 1
NaN	NaN	24.3057	19.4656	NaN	NaN	NaN	NaN	9	984.56	0.068559	75.738	AADKLIQNL	Q96FQ6	Q96FQ6	S100A16	Protein S100-A16
NaN	NaN	22.8615	NaN	NaN	NaN	NaN	NaN	9	1019.53	0.10039	66.429	AADKNEILF	Q9NWX6	Q9NWX6	THG1L	Probable tRNA(His) guanylyltransferase
NaN	NaN	23.7052	NaN	NaN	NaN	NaN	NaN	9	1028.58	0.065016	72.879	AADKRPPKF	Q9Y520;Q9Y520-2;Q9Y520-6;Q9Y520-4;Q9Y520-5;Q9Y520-7;Q9Y520-3	Q9Y520	PRRC2C	Protein PRRC2C
NaN	NaN	26.573	25.1683	NaN	NaN	NaN	NaN	9	829.418	0.010081	120.65	AADLGSPSL	Q14669;Q14669-3;Q14669-4;Q14669-2	Q14669	TRIP12	E3 ubiquitin-protein ligase TRIP12
NaN	NaN	NaN	NaN	NaN	NaN	NaN	NaN	15	1701.89	0.060372	63.283	AADLLEKMLELDVDK	O15264	O15264	MAPK13	Mitogen-activated protein kinase 13
NaN	21.4671	NaN	NaN	NaN	NaN	NaN	NaN	8	873.46	0.10043	86.512	AADLLQFP	Q9UJP4;Q9UJP4-2	Q9UJP4	KLHL21	Kelch-like protein 21
NaN	NaN	25.0477	21.7487	NaN	NaN	NaN	NaN	9	916.477	0.08087	72.138	AADLPARGF	Q8TCT7;Q8TCT7-4;Q8TCT7-2	Q8TCT7	SPPL2B	Signal peptide peptidase-like 2B
NaN	NaN	25.7671	23.7153	NaN	NaN	NaN	NaN	8	906.445	0.14702	75.269	AADNQIYI	P14866;P14866-2	P14866	HNRNPL	Heterogeneous nuclear ribonucleoprotein L
NaN	NaN	NaN	23.5999	NaN	NaN	NaN	NaN	9	903.419	0.0088061	129.39	AADPETTTV	P13611;P13611-5;P13611-2	P13611	VCAN	Versican core protein
NaN	NaN	24.8333	NaN	NaN	NaN	NaN	NaN	10	979.545	0.016913	108.46	AADPGLPARL	Q9BTY7	Q9BTY7	HGH1	Protein HGH1 homolog
NaN	NaN	NaN	24.8843	NaN	NaN	NaN	NaN	9	884.497	0.087047	70.332	AADPLASKL	P53618	P53618	COPB1	Coatomer subunit beta
NaN	NaN	25.3597	24.4058	NaN	NaN	NaN	NaN	9	884.46	0.03967	89.046	AADPSVVNL	Q6YP21;Q6YP21-3;Q6YP21-2	Q6YP21	CCBL2	Kynurenine--oxoglutarate transaminase 3
NaN	NaN	24.7823	25.0385	NaN	NaN	NaN	NaN	9	881.486	0.060431	78.616	AADPVSPLL	Q15833;Q15833-2;Q15833-3	Q15833	STXBP2	Syntaxin-binding protein 2
NaN	NaN	23.5736	22.4793	NaN	NaN	NaN	NaN	9	956.529	0.0093581	122.19	AADQAKQLL	Q8TB05;Q8IYN6	Q8TB05	UBALD1;UBALD2	UBA-like domain-containing protein 1;UBA-like domain-containing protein 2
NaN	NaN	23.473	NaN	NaN	NaN	NaN	NaN	9	1004.46	0.10066	66.351	AADRAIEEM	P0CB38	P0CB38	PABPC4L	Polyadenylate-binding protein 4-like
NaN	NaN	25.1546	23.8557	NaN	NaN	NaN	NaN	9	884.472	0.026002	99.139	AADRPGVSL	A1A4S6	A1A4S6	ARHGAP10	Rho GTPase-activating protein 10
NaN	NaN	24.4978	22.6688	NaN	NaN	NaN	NaN	9	923.424	0.073083	74.415	AADSEAITF	P17655;P17655-2	P17655	CAPN2	Calpain-2 catalytic subunit
NaN	NaN	NaN	22.2524	NaN	NaN	NaN	NaN	9	773.356	0.0083897	134.12	AADSPGSGL	Q92618	Q92618	ZNF516	Zinc finger protein 516
22.341	NaN	NaN	NaN	NaN	NaN	NaN	NaN	9	991.377	5.62e-08	199.55	AADSYTDSY	P18583;P18583-5;P18583-2;P18583-7;P18583-9;P18583-3;P18583-6;P18583-10;P18583-4	P18583	SON	Protein SON
NaN	NaN	22.452	24.8909	NaN	NaN	NaN	NaN	8	759.376	0.057919	104.11	AADTAAQI	P30491;P10319;P30685;P30484;P18465;P17693;P18463;P30480;P30460;P30481;P30487;P30490;P18464;P30498;P30492;P30495;P30493;P30508;Q29960-2;Q29960;Q07000;Q29865;P30499;Q29963;Q31612;Q95365;Q29836;P30475;P30462;P10321	P18463	HLA-B;HLA-G;HLA-C	HLA class I histocompatibility antigen, B-53 alpha chain;HLA class I histocompatibility antigen, B-58 alpha chain;HLA class I histocompatibility antigen, B-35 alpha chain;HLA class I histocompatibility antigen, B-46 alpha chain;HLA class I histocompatibility antigen, B-57 alpha chain;HLA class I histocompatibility antigen, alpha chain G;HLA class I histocompatibility antigen, B-37 alpha chain;HLA…
NaN	NaN	23.3317	21.535	NaN	NaN	NaN	NaN	9	964.523	0.088826	69.812	AADTLVTKF	Q9NUJ1;Q9NUJ1-3;Q9NUJ1-2	Q9NUJ1	ABHD10	Mycophenolic acid acyl-glucuronide esterase, mitochondrial
NaN	NaN	24.2135	20.5383	NaN	NaN	NaN	NaN	10	1026.52	0.0043196	133.81	AADTPPLETL	Q13685	Q13685	AAMP	Angio-associated migratory cell protein
NaN	NaN	NaN	22.093	NaN	NaN	NaN	NaN	9	949.414	0.047173	77.923	AADVQGENF	Q8NHJ6;Q8NHJ6-2;Q8NHJ6-3	Q8NHJ6	LILRB4	Leukocyte immunoglobulin-like receptor subfamily B member 4
NaN	NaN	23.61	NaN	NaN	NaN	NaN	NaN	9	771.413	0.057755	79.939	AAEAAAAVV	O75400;O75400-2;O75400-3	O75400	PRPF40A	Pre-mRNA-processing factor 40 homolog A
NaN	NaN	23.7552	NaN	NaN	NaN	NaN	NaN	9	979.45	0.11053	64.757	AAEDAVYEL	Q92817	Q92817	EVPL	Envoplakin
NaN	NaN	24.4983	NaN	NaN	NaN	NaN	NaN	9	969.477	0.065342	89.142	AAEDQPINL	Q96MY1;Q96MY1-2	Q96MY1	NOL4L	Nucleolar protein 4-like
NaN	NaN	24.164	NaN	NaN	NaN	NaN	NaN	9	925.512	0.024278	100.74	AAEILPAEL	Q96ED9;Q96ED9-2	Q96ED9	HOOK2	Protein Hook homolog 2
NaN	NaN	26.7075	NaN	NaN	NaN	NaN	NaN	9	885.517	0.043751	86.866	AAEIVLSAL	Q8WUY3;Q8WUY3-4;Q8WUY3-2;Q8WUY3-3	Q8WUY3	PRUNE2	Protein prune homolog 2
NaN	NaN	26.5119	NaN	NaN	NaN	NaN	NaN	9	943.545	0.0099681	120.87	AAEKGVRTL	O60664;O60664-4;O60664-3	O60664	PLIN3	Perilipin-3
NaN	NaN	24.9295	NaN	NaN	NaN	NaN	NaN	9	984.633	0.12451	70.256	AAEKKVVKI	P82979	P82979	SARNP	SAP domain-containing ribonucleoprotein
NaN	NaN	27.8446	NaN	NaN	NaN	NaN	NaN	8	943.545	0.078396	84.568	AAEKLRKE	Q15149;Q15149-4;Q15149-2;Q15149-6;Q15149-9;Q15149-7;Q15149-8;Q15149-5;Q15149-3	Q15149	PLEC	Plectin
NaN	NaN	NaN	NaN	18.9433	NaN	NaN	NaN	14	1473.84	0.34052	45.359	AAELISVSKFLPIS	Q86VB7	Q86VB7	CD163	Scavenger receptor cysteine-rich type 1 protein M130;Soluble CD163
NaN	NaN	NaN	NaN	NaN	NaN	NaN	NaN	16	1778.81	0.056095	75.479	AAELRSEDYELLCPNG	P08582	P08582	MFI2	Melanotransferrin
NaN	NaN	NaN	NaN	23.0043	NaN	NaN	NaN	9	1030.56	0.38641	36.842	AAERVKAWT	Q8IXM6;Q8IXM6-2	Q8IXM6	NRM	Nurim
NaN	NaN	23.256	21.8872	NaN	NaN	NaN	NaN	9	923.46	0.040092	88.734	AAESVSTFL	Q8IY21	Q8IY21	DDX60	Probable ATP-dependent RNA helicase DDX60
NaN	NaN	27.0694	NaN	NaN	NaN	NaN	NaN	9	947.481	0.020203	105.2	AAETTLTEL	P05783	P05783	KRT18	Keratin, type I cytoskeletal 18
NaN	NaN	24.9535	NaN	NaN	NaN	NaN	NaN	9	873.444	0.13598	60.799	AAEVAATEI	P52272;P52272-2	P52272	HNRNPM	Heterogeneous nuclear ribonucleoprotein M
NaN	NaN	23.6886	NaN	NaN	NaN	NaN	NaN	9	994.512	0.062334	77.674	AAEYPAVKF	Q13371;Q13371-2	Q13371	PDCL	Phosducin-like protein
NaN	24.1631	NaN	NaN	NaN	NaN	NaN	NaN	9	1032.53	0.035417	92.187	AAFAYTVKY	Q8N2K1-3;Q8N2K1;Q8N2K1-2	Q8N2K1-3	UBE2J2	Ubiquitin-conjugating enzyme E2 J2
NaN	NaN	NaN	20.0063	NaN	NaN	NaN	NaN	19	2086.96	0.007505	79.311	AAFDDAIAELDTLSEESYK	P62258;P62258-2	P62258	YWHAE	14-3-3 protein epsilon
23.1786	NaN	NaN	NaN	NaN	NaN	NaN	NaN	10	1085.53	0.012307	113.66	AAFDGHAREL	Q3MIP1	Q3MIP1	ITPRIPL2	Inositol 1,4,5-trisphosphate receptor-interacting protein-like 2
NaN	NaN	24.7346	25.3577	NaN	NaN	NaN	NaN	9	976.523	0.014863	111.17	AAFEKALEV	Q13325	Q13325	IFIT5	Interferon-induced protein with tetratricopeptide repeats 5
NaN	NaN	NaN	NaN	NaN	NaN	NaN	NaN	15	1516.72	0.00257	151.79	AAFFDTASTGKTFPG	P02671;P02671-2	P02671	FGA	Fibrinogen alpha chain;Fibrinopeptide A;Fibrinogen alpha chain
29.1874	30.3415	NaN	NaN	NaN	NaN	NaN	NaN	9	895.444	0.05281	82.386	AAFPGASLY	Q15038;Q15038-2;Q15038-5	Q15038	DAZAP2	DAZ-associated protein 2
NaN	23.5159	NaN	NaN	NaN	NaN	NaN	NaN	9	1071.62	0.095373	67.897	AAFREPRLL	P08865	P08865	RPSA	40S ribosomal protein SA
21.809	NaN	NaN	NaN	NaN	NaN	NaN	NaN	18	1742.02	2.81e-49	210.43	AAGAGKVTKSAQKAQKAK	P68104;P68104-2;Q5VTE0	P68104	EEF1A1;EEF1A1P5	Elongation factor 1-alpha 1;Putative elongation factor 1-alpha-like 3
NaN	NaN	NaN	NaN	NaN	NaN	NaN	NaN	9	819.343	0.0092201	123.99	AAGEPGTSM	Q5VTR2	Q5VTR2	RNF20	E3 ubiquitin-protein ligase BRE1A
NaN	NaN	NaN	22.0748	NaN	NaN	NaN	NaN	8	785.451	0.064597	100.07	AAGNAVKR	Q9Y490;Q9Y4G6	Q9Y490	TLN1;TLN2	Talin-1;Talin-2
NaN	NaN	23.7018	23.9665	NaN	NaN	NaN	NaN	8	811.455	0.11207	83.614	AAGPELRV	Q5T6V5	Q5T6V5	C9orf64	UPF0553 protein C9orf64
23.2693	NaN	NaN	NaN	NaN	NaN	NaN	NaN	9	897.405	0.051849	82.263	AAGPTGMFF	P24928	P24928	POLR2A	DNA-directed RNA polymerase II subunit RPB1
NaN	NaN	NaN	NaN	NaN	NaN	NaN	NaN	13	1204.56	0.14703	62.303	AAGQAGNEAGRFG	Q6UWP8	Q6UWP8	SBSN	Suprabasin
NaN	NaN	27.1413	25.5229	NaN	NaN	NaN	NaN	8	825.471	0.10954	84.244	AAGRPLEL	P42167;P42167-2	P42167	TMPO	Lamina-associated polypeptide 2, isoforms beta/gamma;Thymopoietin;Thymopentin
NaN	NaN	NaN	NaN	22.1247	NaN	NaN	NaN	20	2651.33	0.20145	47.68	AAHHEEFKRYEMLKEHERRR	Q02818	Q02818	NUCB1	Nucleobindin-1
NaN	NaN	NaN	NaN	23.0403	NaN	NaN	NaN	21	2814.39	0.3148	50.883	AAHHEEFKRYEMLKEHERRRY	Q02818	Q02818	NUCB1	Nucleobindin-1
NaN	NaN	NaN	NaN	NaN	NaN	20.3177	NaN	11	1123.57	0.22778	75.854	AAHLPAEFTPA	P69905	P69905	HBA1	Hemoglobin subunit alpha
NaN	NaN	NaN	NaN	22.7283	NaN	NaN	NaN	19	2021.04	0.0010937	79.489	AAHLPAEFTPAVHASLDKF	P69905	P69905	HBA1	Hemoglobin subunit alpha
NaN	NaN	25.7482	NaN	NaN	NaN	NaN	NaN	9	992.515	0.021386	103.91	AAHPTNVQR	P35222	P35222	CTNNB1	Catenin beta-1
NaN	NaN	23.1749	NaN	NaN	NaN	NaN	NaN	10	1105.6	0.10852	71.877	AAHPTNVQRL	P35222	P35222	CTNNB1	Catenin beta-1
NaN	NaN	NaN	NaN	NaN	NaN	NaN	NaN	9	915.481	0.098323	67.035	AAHSVVLGY	Q96A65;Q96A65-2	Q96A65	EXOC4	Exocyst complex component 4
NaN	NaN	NaN	NaN	NaN	NaN	NaN	NaN	9	914.425	0.064769	76.847	AAHTSGQPF	Q5T5P2;Q5T5P2-3;Q5T5P2-9;Q5T5P2-2;Q5T5P2-7;Q5T5P2-10;Q5T5P2-4;Q5T5P2-8;Q5T5P2-6	Q5T5P2	KIAA1217	Sickle tail protein homolog
20.898	NaN	NaN	NaN	NaN	NaN	NaN	NaN	9	903.445	0.11729	70.716	AAHTVTAAY	Q96KR1	Q96KR1	ZFR	Zinc finger RNA-binding protein
23.437	NaN	NaN	NaN	NaN	NaN	NaN	NaN	11	1297.6	0.00032165	128.6	AAIDWFDGKEF	Q92804;Q92804-2;P35637;P35637-2	P35637	TAF15;FUS	TATA-binding protein-associated factor 2N;RNA-binding protein FUS
NaN	NaN	NaN	NaN	NaN	NaN	23.2936	NaN	13	1445.85	0.016992	88.163	AAIFRSLTKRNAV	Q99985;Q99985-2	Q99985	SEMA3C	Semaphorin-3C
NaN	NaN	NaN	NaN	NaN	NaN	27.6826	NaN	14	1601.95	8.76e-52	236.42	AAIFRSLTKRNAVR	Q99985;Q99985-2	Q99985	SEMA3C	Semaphorin-3C
21.38	21.6098	NaN	NaN	NaN	NaN	NaN	NaN	9	948.503	0.050681	82.716	AAIPRSTSF	Q9P2F8;Q9P2F8-2	Q9P2F8	SIPA1L2	Signal-induced proliferation-associated 1-like protein 2
NaN	NaN	23.1834	NaN	NaN	NaN	NaN	NaN	9	908.519	0.077126	73.233	AAISHAIAR	O96014	O96014	WNT11	Protein Wnt-11
NaN	NaN	24.4123	23.882	NaN	NaN	NaN	NaN	9	971.54	0.011969	116.9	AAISQVDRL	P09496;P09496-2;P09496-4;P09496-3	P09496	CLTA	Clathrin light chain A
20.9494	22.971	NaN	NaN	NaN	NaN	NaN	NaN	8	869.57	0.043429	114.02	AAITILRI	P17987	P17987	TCP1	T-complex protein 1 subunit alpha
24.3778	NaN	NaN	NaN	NaN	NaN	NaN	NaN	9	1000.55	3.82e-05	198.25	AAIVARHTY	Q9H3M7;Q9H3M7-2	Q9H3M7	TXNIP	Thioredoxin-interacting protein
NaN	NaN	NaN	NaN	NaN	NaN	NaN	NaN	9	988.618	0.023383	101.72	AAIVHPLRL	Q9H1C0	Q9H1C0	LPAR5	Lysophosphatidic acid receptor 5
23.0245	NaN	NaN	NaN	NaN	NaN	NaN	NaN	9	820.444	0.020554	111.82	AAKAAGVSF	Q86X53	Q86X53	ERICH1	Glutamate-rich protein 1
21.8664	23.3746	NaN	NaN	NaN	NaN	NaN	NaN	9	948.492	0.044105	86.095	AAKAALEEF	Q92922	Q92922	SMARCC1	SWI/SNF complex subunit SMARCC1
NaN	NaN	NaN	NaN	NaN	NaN	NaN	NaN	9	827.486	0.066031	76.478	AAKAPTKAA	P83731	P83731	RPL24	60S ribosomal protein L24
NaN	NaN	NaN	NaN	NaN	NaN	NaN	NaN	11	1052.63	0.058631	95.618	AAKAPTKAAPK	P83731	P83731	RPL24	60S ribosomal protein L24
NaN	NaN	23.6169	22.4958	NaN	NaN	NaN	NaN	8	872.508	0.045613	111.95	AAKDSILR	Q16864;Q16864-2	Q16864	ATP6V1F	V-type proton ATPase subunit F
NaN	NaN	NaN	NaN	NaN	NaN	NaN	NaN	9	921.492	0.056205	92.051	AAKEGATKF	Q8N6T3;Q8N6T3-4;Q8N6T3-5;Q8N6T3-3;Q8N6T3-2	Q8N6T3	ARFGAP1	ADP-ribosylation factor GTPase-activating protein 1
NaN	NaN	NaN	NaN	NaN	NaN	NaN	NaN	9	841.429	0.075816	73.616	AAKEPGAQA	Q9BVN2;Q9BVN2-4	Q9BVN2	RUSC1	RUN and SH3 domain-containing protein 1
NaN	NaN	NaN	NaN	NaN	NaN	20.5788	NaN	14	1602.9	0.33378	38.028	AAKFVNQLKGESRR	Q16891;Q16891-2;Q16891-3;Q16891-4	Q16891	IMMT	MICOS complex subunit MIC60
NaN	NaN	NaN	NaN	24.4946	NaN	NaN	NaN	17	1889.1	8.52e-05	133.71	AAKIFNLYPRKGRISVG	Q14195;Q14195-2	Q14195	DPYSL3	Dihydropyrimidinase-related protein 3
NaN	NaN	NaN	NaN	NaN	26.8004	NaN	NaN	15	1503.96	3.52e-19	162.72	AAKPKAAKPKAAKPK	P16401	P16401	HIST1H1B	Histone H1.5
NaN	NaN	NaN	NaN	NaN	NaN	NaN	NaN	12	1238.82	0.020966	93.561	AAKPKKAAAKKK	P10412	P10412	HIST1H1E	Histone H1.4
NaN	NaN	NaN	NaN	24.5919	21.3744	NaN	21.6077	15	1533.97	2.55e-10	173.71	AAKPKTAKPKAAKPK	P10412	P10412	HIST1H1E	Histone H1.4
NaN	NaN	NaN	NaN	NaN	NaN	NaN	NaN	22	2259.46	0.00031279	100.94	AAKPKTAKPKAAKPKKAAAKKK	P10412	P10412	HIST1H1E	Histone H1.4
NaN	23.3605	NaN	NaN	NaN	NaN	NaN	NaN	10	1064.71	0.079496	78.098	AAKPKVVKPK	P16403	P16403	HIST1H1C	Histone H1.2
NaN	NaN	NaN	NaN	NaN	NaN	NaN	NaN	17	1816.21	0.0082042	144.18	AAKPKVVKPKKAAPKKK	P16403	P16403	HIST1H1C	Histone H1.2
23.8709	NaN	NaN	NaN	NaN	NaN	NaN	NaN	9	850.491	0.032231	94.539	AAKPPPLSA	Q7Z5L9;Q7Z5L9-2	Q7Z5L9	IRF2BP2	Interferon regulatory factor 2-binding protein 2
NaN	NaN	NaN	NaN	NaN	NaN	NaN	NaN	9	871.476	0.030603	95.741	AAKSPSAQL	Q14203;Q14203-6;Q14203-3;Q14203-4;Q14203-5;Q14203-2	Q14203	DCTN1	Dynactin subunit 1
22.3855	21.5642	NaN	NaN	NaN	NaN	NaN	NaN	9	886.512	0.038844	89.752	AAKVTGEVL	O75955;O75955-2	O75955	FLOT1	Flotillin-1
NaN	NaN	NaN	NaN	24.5217	NaN	NaN	NaN	13	1363.7	0.011389	110.14	AAKYQLDPTASIS	P45880;P45880-2;P45880-1	P45880	VDAC2	Voltage-dependent anion-selective channel protein 2
NaN	NaN	NaN	NaN	24.3643	NaN	NaN	NaN	14	1434.74	0.00052762	130.94	AAKYQLDPTASISA	P45880;P45880-2;P45880-1	P45880	VDAC2	Voltage-dependent anion-selective channel protein 2
NaN	NaN	23.2313	NaN	NaN	NaN	NaN	NaN	8	741.45	0.095102	87.839	AALALAGR	Q86UU1;Q86UU1-2;Q86UU1-3	Q86UU1	PHLDB1	Pleckstrin homology-like domain family B member 1
NaN	NaN	NaN	24.9079	NaN	NaN	NaN	NaN	9	918.54	0.0069359	144.58	AALHGPVVR	Q96RQ9;Q96RQ9-2	Q96RQ9	IL4I1	L-amino-acid oxidase
NaN	23.0841	NaN	NaN	NaN	NaN	NaN	NaN	10	994.545	0.12293	68.915	AALHSPSSLL	Q96C11-3	Q96C11-3
21.6667	25.4763	NaN	NaN	NaN	NaN	NaN	NaN	8	852.543	0.016756	148.07	AALKLPQI	Q8N755-2;Q8N755	Q8N755-2	PQLC3	PQ-loop repeat-containing protein 3
NaN	NaN	24.0417	26.0762	NaN	NaN	NaN	NaN	9	932.556	0.015258	110.61	AALPGIVHR	Q9Y3I0	Q9Y3I0	RTCB	tRNA-splicing ligase RtcB homolog
21.1571	NaN	NaN	NaN	NaN	NaN	NaN	NaN	12	1303.87	0.080749	69.672	AALRPLVKPKIV	P62910	P62910	RPL32	60S ribosomal protein L32
NaN	NaN	NaN	NaN	NaN	NaN	NaN	NaN	9	955.581	0.035033	92.47	AALRQALTL	Q53GL7	Q53GL7	PARP10	Poly [ADP-ribose] polymerase 10
NaN	NaN	NaN	NaN	NaN	NaN	NaN	NaN	9	941.566	0.011449	117.93	AALSQALRL	Q8IZQ5	Q8IZQ5	SELH	Selenoprotein H
NaN	NaN	NaN	NaN	NaN	NaN	NaN	NaN	14	1512.87	3.26e-05	143	AAMALEKKLNQALL	P02792	P02792	FTL	Ferritin light chain
NaN	NaN	NaN	NaN	NaN	NaN	NaN	NaN	9	990.496	0.055012	81.296	AAMPRPVSY	Q6TFL4	Q6TFL4	KLHL24	Kelch-like protein 24
NaN	NaN	NaN	26.882	NaN	NaN	NaN	NaN	9	924.485	0.098464	66.994	AANGVIHML	Q9NY15;Q9NY15-2	Q9NY15	STAB1	Stabilin-1
NaN	NaN	24.5827	25.7187	NaN	NaN	NaN	NaN	9	954.586	0.066031	92.467	AANKVVLQL	Q9NX08	Q9NX08	COMMD8	COMM domain-containing protein 8
NaN	NaN	23.3063	NaN	NaN	NaN	NaN	NaN	9	926.519	0.07779	73.039	AANLNNLVV	P26012;P26012-2	P26012	ITGB8	Integrin beta-8
NaN	NaN	NaN	NaN	NaN	NaN	NaN	NaN	14	1707.76	0.18309	50.102	AANMRSMQRYHQDT	Q96PD5;Q96PD5-2	Q96PD5	PGLYRP2	N-acetylmuramoyl-L-alanine amidase
22.2593	24.1943	NaN	NaN	NaN	NaN	NaN	NaN	9	988.477	0.023438	104.45	AANPHSFVF	Q9NQ55;Q9NQ55-2;Q9NQ55-3	Q9NQ55	PPAN	Suppressor of SWI4 1 homolog
21.2135	NaN	NaN	NaN	NaN	NaN	NaN	NaN	9	1024.47	0.048979	83.377	AANPNGRYY	P02675;CON__P02676	P02675	FGB	Fibrinogen beta chain;Fibrinopeptide B;Fibrinogen beta chain
21.6618	25.67	NaN	NaN	NaN	NaN	NaN	NaN	9	802.418	0.03954	89.142	AANSVAASL	P09912;P09912-2;P09912-3	P09912	IFI6	Interferon alpha-inducible protein 6
NaN	NaN	NaN	NaN	NaN	NaN	NaN	NaN	9	828.434	0.020618	104.75	AANTPTVGV	Q0JRZ9;Q0JRZ9-3	Q0JRZ9	FCHO2	F-BAR domain only protein 2
22.9001	NaN	NaN	NaN	NaN	NaN	NaN	NaN	9	669.345	0.063072	77.906	AAPAAAAGA	Q96S94;Q96S94-5;Q96S94-2;Q96S94-4	Q96S94	CCNL2	Cyclin-L2
NaN	NaN	24.0523	NaN	NaN	NaN	NaN	NaN	9	943.396	0.090124	69.432	AAPAPEEEM	P26641;P26641-2	P26641	EEF1G	Elongation factor 1-gamma
NaN	NaN	23.4578	NaN	NaN	NaN	NaN	NaN	10	1064.57	0.0092047	116.3	AAPDITGHKR	Q9Y639;Q9Y639-3;Q9Y639-1;Q9Y639-5;Q9Y639-4	Q9Y639	NPTN	Neuroplastin
NaN	NaN	NaN	NaN	NaN	NaN	NaN	NaN	21	2104.07	4.64e-05	102.98	AAPPSGGPGFLSIERPDSRPP	P0C0L5;P0C0L4;P0C0L4-2	P0C0L5	C4B;C4A	Complement C4-B;Complement C4 beta chain;Complement C4-B alpha chain;C4a anaphylatoxin;C4b-B;C4d-B;Complement C4 gamma chain;Complement C4-A;Complement C4 beta chain;Complement C4-A alpha chain;C4a anaphylatoxin;C4b-A;C4d-A;Complement C4 gamma chain
NaN	NaN	NaN	NaN	23.6667	NaN	NaN	NaN	16	1834.95	0.027632	86.944	AAPQYQKAFQNVFAPR	P15586;P15586-2	P15586	GNS	N-acetylglucosamine-6-sulfatase
NaN	NaN	NaN	NaN	23.3937	NaN	NaN	NaN	15	1338.73	0.013713	89.247	AAQFGLVPGVGVAPG	P15502;P15502-5;P15502-2;P15502-4	P15502	ELN	Elastin
NaN	NaN	NaN	NaN	24.8028	NaN	NaN	NaN	17	2006.98	0.010879	84.874	AAQFVTRHPINEYYIAD	Q92673	Q92673	SORL1	Sortilin-related receptor
NaN	NaN	NaN	NaN	20.5018	NaN	NaN	NaN	19	2248.23	0.00057726	114.4	AAQITKRKWEAVHAAEQRR	P30455;P30443	P30455	HLA-A	HLA class I histocompatibility antigen, A-36 alpha chain;HLA class I histocompatibility antigen, A-1 alpha chain
19.9901	NaN	NaN	NaN	NaN	NaN	NaN	NaN	12	1434.66	0.089345	68.536	AAQMHSGYQRRM	Q96PK6	Q96PK6	RBM14	RNA-binding protein 14
NaN	NaN	NaN	NaN	24.5571	NaN	NaN	NaN	17	1907.13	0.0023882	100.41	AARGAVRLQRPFLRSPL	Q9BSK0	Q9BSK0	MARVELD1	MARVEL domain-containing protein 1
NaN	NaN	NaN	NaN	23.3345	NaN	NaN	NaN	18	1964.15	0.38834	34.928	AARGAVRLQRPFLRSPLG	Q9BSK0	Q9BSK0	MARVELD1	MARVEL domain-containing protein 1
NaN	NaN	NaN	NaN	NaN	NaN	NaN	NaN	15	1719	3.04e-10	144.68	AARLEKLARRPGEPR	A0PJZ3	A0PJZ3	GXYLT2	Glucoside xylosyltransferase 2
20.4592	NaN	NaN	NaN	NaN	NaN	NaN	NaN	9	940.571	0.1062	67.032	AARLPTTVL	Q9GZM5	Q9GZM5	YIPF3	Protein YIPF3;Protein YIPF3, 36 kDa form III
20.8196	NaN	NaN	NaN	NaN	NaN	NaN	NaN	8	840.482	0.078946	97.473	AARLQPSV	Q13608;Q13608-3	Q13608	PEX6	Peroxisome assembly factor 2
NaN	NaN	NaN	NaN	NaN	NaN	NaN	NaN	9	1047.57	0.023826	91.626	AARLVLENY	Q8IXJ9;Q8IXJ9-2	Q8IXJ9	ASXL1	Putative Polycomb group protein ASXL1
24.151	NaN	NaN	NaN	NaN	NaN	NaN	NaN	9	886.487	0.0053194	132.08	AARPATSTL	Q04637;Q04637-3;Q04637-8;Q04637-6;Q04637-7;Q04637-5;Q04637-4;Q04637-9	Q04637	EIF4G1	Eukaryotic translation initiation factor 4 gamma 1
NaN	NaN	NaN	NaN	NaN	25.0586	NaN	NaN	19	2170.2	0.00049414	100.35	AARRTGRLRGTKTVQEKEN	P62917	P62917	RPL8	60S ribosomal protein L8
24.0533	NaN	NaN	NaN	NaN	NaN	NaN	NaN	9	1037.51	0.019297	117.4	AARSQLETY	Q86VS8	Q86VS8	HOOK3	Protein Hook homolog 3
NaN	NaN	25.1269	20.847	NaN	NaN	NaN	NaN	9	844.477	0.0085998	132.08	AASAISVAR	P05155;P05155-3;P05155-2	P05155	SERPING1	Plasma protease C1 inhibitor
NaN	NaN	NaN	NaN	NaN	NaN	NaN	NaN	9	885.471	0.19091	51.572	AASALLHGF	Q9H237;Q9H237-5;Q9H237-4;Q9H237-3;Q9H237-2	Q9H237	PORCN	Protein-serine O-palmitoleoyltransferase porcupine
NaN	22.3608	NaN	NaN	NaN	NaN	NaN	NaN	9	811.48	0.0146	111.69	AASALPALV	P36578	P36578	RPL4	60S ribosomal protein L4
21.4283	NaN	NaN	NaN	NaN	NaN	NaN	NaN	12	1157.65	0.013342	87.298	AASALPALVMSK	P36578	P36578	RPL4	60S ribosomal protein L4
NaN	NaN	NaN	22.9386	NaN	NaN	NaN	NaN	9	914.501	0.058707	79.469	AASAPVMLR	Q9BZZ2;Q9BZZ2-3;Q9BZZ2-2	Q9BZZ2	SIGLEC1	Sialoadhesin
NaN	NaN	NaN	NaN	NaN	NaN	NaN	NaN	9	929.529	0.015617	110.22	AASARTLQL	Q53GL0;Q53GL0-2	Q53GL0	PLEKHO1	Pleckstrin homology domain-containing family O member 1
20.0911	NaN	NaN	NaN	NaN	NaN	NaN	NaN	17	1520.69	0.12874	48.741	AASDPQHPAASEGAAAA	Q99536;Q99536-3	Q99536	VAT1	Synaptic vesicle membrane protein VAT-1 homolog
NaN	NaN	24.5667	24.1674	NaN	NaN	NaN	NaN	9	1020.5	0.0016413	172.15	AASENIFNR	Q8TF05;Q8TF05-2	Q8TF05	PPP4R1	Serine/threonine-protein phosphatase 4 regulatory subunit 1
NaN	NaN	NaN	NaN	NaN	NaN	NaN	NaN	9	910.403	0.026978	98.418	AASGDVQTY	P16220;P16220-2	P16220	CREB1	Cyclic AMP-responsive element-binding protein 1
NaN	NaN	NaN	NaN	NaN	NaN	NaN	NaN	9	857.468	0.045194	78.994	AASGLPLMV	O95881	O95881	TXNDC12	Thioredoxin domain-containing protein 12
NaN	NaN	23.4383	23.1238	NaN	NaN	NaN	NaN	9	900.503	0.061478	90.709	AASGRVLEV	Q96C23	Q96C23	GALM	Aldose 1-epimerase
NaN	NaN	24.097	NaN	NaN	NaN	NaN	NaN	8	828.493	0.020701	144.35	AASGVLRR	O15231;O15231-3;O15231-4;O15231-7;O15231-8;O15231-6;O15231-2	O15231	ZNF185	Zinc finger protein 185
NaN	NaN	25.2141	26.1794	NaN	NaN	NaN	NaN	8	820.481	0.065679	99.511	AASHPLLL	P20591;P20591-2	P20591	MX1	Interferon-induced GTP-binding protein Mx1;Interferon-induced GTP-binding protein Mx1, N-terminally processed
NaN	NaN	25.6684	24.7433	NaN	NaN	NaN	NaN	8	898.571	0.071682	97.033	AASIIIRR	P55263;P55263-4;P55263-2;P55263-3	P55263	ADK	Adenosine kinase
NaN	NaN	NaN	NaN	NaN	NaN	NaN	NaN	11	1103.59	0.0024259	132.39	AASKERSGVSL	P16403;P10412;P16402	P16403	HIST1H1C;HIST1H1E;HIST1H1D	Histone H1.2;Histone H1.4;Histone H1.3
NaN	NaN	21.3427	NaN	NaN	NaN	NaN	NaN	9	939.489	0.12826	54.416	AASPRGEPR	P30492;P30508;Q29960-2;Q29960;Q07000;Q29865;P30499;Q29963;Q9TNN7;P10321	P30492	HLA-B;HLA-C	HLA class I histocompatibility antigen, B-54 alpha chain;HLA class I histocompatibility antigen, Cw-12 alpha chain;HLA class I histocompatibility antigen, Cw-16 alpha chain;HLA class I histocompatibility antigen, Cw-15 alpha chain;HLA class I histocompatibility antigen, Cw-18 alpha chain;HLA class I histocompatibility antigen, Cw-1 alpha chain;HLA class I histocompatibility antigen, Cw-6 alpha ch…
24.9527	NaN	NaN	NaN	NaN	NaN	NaN	NaN	9	905.449	0.014143	112.59	AASPVVAEY	Q9H400;Q9H400-2	Q9H400	LIME1	Lck-interacting transmembrane adapter 1
20.1941	NaN	NaN	NaN	NaN	NaN	NaN	NaN	9	847.411	0.043751	86.866	AASPVVSSM	P18583;P18583-5;P18583-2;P18583-7;P18583-9;P18583-3;P18583-6;P18583-10;P18583-4	P18583	SON	Protein SON
NaN	21.3906	NaN	NaN	NaN	NaN	NaN	NaN	9	943.545	0.057169	80.229	AASSIQRVL	Q5BKT4;Q5I7T1	Q5BKT4	ALG10;ALG10B	Dol-P-Glc:Glc(2)Man(9)GlcNAc(2)-PP-Dol alpha-1,2-glucosyltransferase;Putative Dol-P-Glc:Glc(2)Man(9)GlcNAc(2)-PP-Dol alpha-1,2-glucosyltransferase
NaN	NaN	24.5866	23.7698	NaN	NaN	NaN	NaN	8	756.438	0.040431	116.87	AASSPLLV	P12757;P12757-5;P12757-3	P12757	SKIL	Ski-like protein
NaN	22.8379	NaN	NaN	NaN	NaN	NaN	NaN	9	936.503	0.040165	103.8	AASSVRVTF	Q08431;Q08431-2;Q08431-3	Q08431	MFGE8	Lactadherin;Lactadherin short form;Medin
NaN	NaN	26.3168	NaN	NaN	NaN	NaN	NaN	9	872.497	0.091001	69.176	AASTAQLLV	Q9Y490;Q9Y4G6	Q9Y490	TLN1;TLN2	Talin-1;Talin-2
NaN	21.6589	NaN	NaN	NaN	NaN	NaN	NaN	8	811.492	0.064839	99.919	AASVRPVL	Q9H269;Q9H269-2	Q9H269	VPS16	Vacuolar protein sorting-associated protein 16 homolog
NaN	NaN	NaN	NaN	NaN	NaN	NaN	NaN	9	912.576	0.023494	101.6	AATARVLVI	O15381;O15381-3;O15381-4;O15381-2;O15381-5	O15381	NVL	Nuclear valosin-containing protein-like
18.4596	NaN	NaN	NaN	NaN	NaN	NaN	NaN	9	943.509	0.0067167	145.34	AATDIARQV	Q14141-4;Q14141;Q14141-2;Q14141-3	Q14141-4	2020-09-06	Septin-6
NaN	NaN	NaN	22.8032	NaN	NaN	NaN	NaN	10	1084.62	0.075143	98.629	AATEVVNILR	Q6J4K2;Q6J4K2-2	Q6J4K2	SLC8B1	Sodium/potassium/calcium exchanger 6, mitochondrial
NaN	NaN	NaN	21.9375	NaN	NaN	NaN	NaN	9	926.591	0.10084	77.923	AATGRLLLL	Q06481;Q06481-5;Q06481-4;Q06481-2;Q06481-3	Q06481	APLP2	Amyloid-like protein 2
22.4733	NaN	NaN	NaN	NaN	NaN	NaN	NaN	9	884.508	0.035822	91.853	AATPAVRTV	P11940;Q9H361	P11940	PABPC1;PABPC3	Polyadenylate-binding protein 1;Polyadenylate-binding protein 3
20.1919	NaN	NaN	NaN	NaN	NaN	NaN	NaN	9	851.403	0.0071773	143.02	AATPVGSSY	Q14865;Q14865-2	Q14865	ARID5B	AT-rich interactive domain-containing protein 5B
NaN	NaN	24.1628	NaN	NaN	NaN	NaN	NaN	9	816.445	0.035295	99.799	AATSVAAAR	O00762;O00762-3;O00762-4	O00762	UBE2C	Ubiquitin-conjugating enzyme E2 C
21.3304	24.2297	NaN	NaN	NaN	NaN	NaN	NaN	9	971.576	0.037326	107.59	AATTVLRQL	Q9UKL0	Q9UKL0	RCOR1	REST corepressor 1
NaN	NaN	NaN	NaN	NaN	NaN	NaN	NaN	9	749.356	0.011618	117.6	AAVAASSSS	P61927	P61927	RPL37	60S ribosomal protein L37
NaN	NaN	27.852	NaN	NaN	NaN	NaN	NaN	9	798.471	0.0059303	148.07	AAVAAVAAR	Q14697;Q14697-2;Q14697-3	Q14697	GANAB	Neutral alpha-glucosidase AB
NaN	NaN	27.4621	NaN	NaN	NaN	NaN	NaN	10	954.572	0.00011685	176.65	AAVAAVAARR	Q14697;Q14697-2;Q14697-3	Q14697	GANAB	Neutral alpha-glucosidase AB
24.768	22.6496	NaN	NaN	NaN	NaN	NaN	NaN	9	835.357	0.0078845	137.83	AAVDAGMAM	P26599-3;P26599;P26599-2	P26599-3	PTBP1	Polypyrimidine tract-binding protein 1
NaN	NaN	24.3404	NaN	NaN	NaN	NaN	NaN	9	916.461	0.048801	84.368	AAVDIGSER	O15231;O15231-3;O15231-4;O15231-7;O15231-8;O15231-6;O15231-5	O15231	ZNF185	Zinc finger protein 185
21.8876	NaN	NaN	NaN	NaN	NaN	NaN	NaN	9	974.503	0.0093581	122.19	AAVDRTTEL	Q8TD16;Q8TD16-2	Q8TD16	BICD2	Protein bicaudal D homolog 2
NaN	NaN	25.6649	NaN	NaN	NaN	NaN	NaN	9	955.556	0.0083415	134.48	AAVDVVRAR	Q0VG06;Q0VG06-3;Q0VG06-2	Q0VG06	FAAP100	Fanconi anemia-associated protein of 100 kDa
NaN	NaN	23.8968	23.8	NaN	NaN	NaN	NaN	11	1181.68	0.0070354	102.06	AAVEPDVVVKR	Q9BQE4	Q9BQE4	VIMP	Selenoprotein S
NaN	23.6628	24.6682	23.3086	NaN	NaN	NaN	NaN	9	863.523	0.081359	71.995	AAVGHVLVV	Q8N5H3-4	Q8N5H3-4
22.8193	NaN	NaN	NaN	NaN	NaN	NaN	NaN	9	912.564	0.005101	132.57	AAVGKELII	Q9HAD4;Q9HAD4-2	Q9HAD4	WDR41	WD repeat-containing protein 41
NaN	18.7279	NaN	NaN	NaN	NaN	NaN	NaN	9	811.371	0.0077458	138.85	AAVGTGSSY	P17275	P17275	JUNB	Transcription factor jun-B
22.6008	NaN	NaN	NaN	NaN	NaN	NaN	NaN	9	967.451	0.032149	94.407	AAVGTHEHF	O00160	O00160	MYO1F	Unconventional myosin-If
21.2346	NaN	NaN	NaN	NaN	NaN	NaN	NaN	9	951.514	0.10639	66.993	AAVNHISQL	Q5T2E6;Q5T2E6-2	Q5T2E6	C10orf76	UPF0668 protein C10orf76
NaN	NaN	NaN	NaN	NaN	NaN	NaN	NaN	9	876.434	0.009104	125.5	AAVPAGQTY	Q13231;Q13231-2;Q13231-3;Q13231-4	Q13231	CHIT1	Chitotriosidase-1
NaN	NaN	NaN	NaN	NaN	NaN	NaN	NaN	9	925.56	0.015444	130.04	AAVPKSLQL	O75843	O75843	AP1G2	AP-1 complex subunit gamma-like 2
NaN	NaN	NaN	NaN	NaN	NaN	NaN	NaN	18	1803.94	0.0010705	105	AAVPSGASTGIYEALELR	P06733;P13929;P13929-3;P13929-2;P09104;P09104-2	P06733	ENO1;ENO3;ENO2	Alpha-enolase;Beta-enolase;Gamma-enolase
NaN	NaN	25.8439	NaN	NaN	NaN	NaN	NaN	9	824.487	0.023849	101.21	AAVPVAAAR	Q9BWK5;Q9BWK5-4	Q9BWK5	MRI	Modulator of retrovirus infection homolog
NaN	NaN	27.4041	27.7909	NaN	NaN	NaN	NaN	9	924.576	0.026923	98.458	AAVPVIISR	Q14919;Q14919-2	Q14919	DRAP1	Dr1-associated corepressor
23.9585	25.3202	NaN	NaN	NaN	NaN	NaN	NaN	9	968.533	0.019299	117.39	AAVSFISKF	P62324	P62324	BTG1	Protein BTG1
20.6873	NaN	NaN	NaN	NaN	NaN	NaN	NaN	9	812.439	0.065801	76.847	AAVSGAQPI	O60664;O60664-4;O60664-3	O60664	PLIN3	Perilipin-3
NaN	25.9724	NaN	NaN	NaN	NaN	NaN	NaN	9	849.46	0.03274	94.163	AAVTATVAF	P51798;P51798-2	P51798	CLCN7	H(+)/Cl(-) exchange transporter 7
NaN	NaN	NaN	NaN	NaN	NaN	NaN	NaN	9	1111.6	0.02747	83.168	AAYDRYLKL	O60508	O60508	CDC40	Pre-mRNA-processing factor 17
24.0665	NaN	NaN	NaN	NaN	NaN	NaN	NaN	10	1006.45	0.0125	117.93	AAYGGYPTAH	Q96KR1	Q96KR1	ZFR	Zinc finger RNA-binding protein
NaN	NaN	NaN	NaN	NaN	NaN	NaN	NaN	9	920.497	0.057169	80.229	AAYGKALDL	Q9NR97;Q9NR97-2	Q9NR97	TLR8	Toll-like receptor 8
22.1863	NaN	NaN	NaN	NaN	NaN	NaN	NaN	9	918.492	0.068657	75.738	AAYGRSPVV	Q04727;Q04727-4;Q04727-3;Q04727-2	Q04727	TLE4	Transducin-like enhancer protein 4
NaN	NaN	24.458	NaN	NaN	NaN	NaN	NaN	9	1061.6	0.022476	89.355	AAYRRALEL	P50542;P50542-3;P50542-4;P50542-2	P50542	PEX5	Peroxisomal targeting signal 1 receptor
22.0771	23.8643	NaN	NaN	NaN	NaN	NaN	NaN	9	1083.5	0.022199	103.02	AAYYHPSYL	Q14687;Q14687-2;Q14687-3	Q14687	GSE1	Genetic suppressor element 1
NaN	23.8528	NaN	NaN	NaN	NaN	NaN	NaN	9	1102.59	0.047096	85.212	AAYYLPRHL	Q9Y618;Q9Y618-3;Q9Y618-5;Q9Y618-4	Q9Y618	NCOR2	Nuclear receptor corepressor 2
19.9433	NaN	NaN	NaN	NaN	NaN	NaN	NaN	9	872.49	0.029057	97.473	ACAGLARLV	Q7Z4Q2	Q7Z4Q2	HEATR3	HEAT repeat-containing protein 3
NaN	25.2794	NaN	NaN	NaN	NaN	NaN	NaN	8	879.397	0.068327	98.418	ADAINTEF	P08670	P08670	VIM	Vimentin
21.6535	NaN	NaN	NaN	NaN	NaN	NaN	NaN	8	827.512	0.16175	73.616	ADAIVVKL	Q7KZF4	Q7KZF4	SND1	Staphylococcal nuclease domain-containing protein 1
NaN	22.6784	NaN	NaN	NaN	NaN	NaN	NaN	9	926.519	0.057298	80.165	ADALRPSVV	Q92616	Q92616	GCN1L1	Translational activator GCN1
21.9164	NaN	NaN	NaN	NaN	NaN	NaN	NaN	9	950.49	0.030451	95.741	ADAMKVIGF	O94832	O94832	MYO1D	Unconventional myosin-Id
NaN	NaN	27.1052	25.6629	NaN	NaN	NaN	NaN	9	853.491	0.12364	62.717	ADAPVALVV	Q9BQ52;Q9BQ52-4;Q9BQ52-2	Q9BQ52	ELAC2	Zinc phosphodiesterase ELAC protein 2
NaN	NaN	NaN	NaN	NaN	NaN	NaN	NaN	10	1020.5	0.059474	84.498	ADATAVRNGF	Q5T4S7;Q5T4S7-4;Q5T4S7-2;Q5T4S7-3;Q5T4S7-5	Q5T4S7	UBR4	E3 ubiquitin-protein ligase UBR4
20.7909	NaN	NaN	NaN	NaN	NaN	NaN	NaN	9	1031.54	0.040001	88.948	ADAVKLERM	P37837	P37837	TALDO1	Transaldolase
NaN	NaN	NaN	NaN	NaN	NaN	NaN	NaN	9	888.449	0.070356	75.213	ADAVRGGLM	Q9UN70;Q9UN70-2	Q9UN70	PCDHGC3	Protocadherin gamma-C3
NaN	NaN	NaN	NaN	NaN	NaN	NaN	NaN	9	986.493	0.022471	103.56	ADAVTHARF	Q92538;Q92538-2;Q92538-3	Q92538	GBF1	Golgi-specific brefeldin A-resistance guanine nucleotide exchange factor 1
23.3398	NaN	NaN	NaN	NaN	NaN	NaN	NaN	9	911.417	0.088346	79.146	ADCPHTIGV	P61106	P61106	RAB14	Ras-related protein Rab-14
NaN	NaN	NaN	24.7681	NaN	NaN	NaN	NaN	9	1079.52	0.0045021	153.04	ADDELSFKR	P62993;P62993-2	P62993	GRB2	Growth factor receptor-bound protein 2
NaN	NaN	NaN	NaN	20.8968	NaN	NaN	NaN	20	2255.16	0.24457	44.641	ADDGKIVIFQSKPEIQYAPH	Q9BXS4	Q9BXS4	TMEM59	Transmembrane protein 59
NaN	NaN	25.1623	NaN	NaN	NaN	NaN	NaN	8	916.498	0.097745	87.181	ADDKTVRL	Q9Y3F4;Q9Y3F4-2	Q9Y3F4	STRAP	Serine-threonine kinase receptor-associated protein
NaN	NaN	NaN	NaN	22.687	NaN	NaN	22.4033	13	1444.72	1.47e-21	204.5	ADDLEGEAFLPLR	Q70J99;Q70J99-3	Q70J99	UNC13D	Protein unc-13 homolog D
NaN	NaN	NaN	NaN	22.5158	NaN	NaN	NaN	14	1573.76	1.25e-05	144.1	ADDLEGEAFLPLRE	Q70J99;Q70J99-3	Q70J99	UNC13D	Protein unc-13 homolog D
NaN	NaN	NaN	NaN	22.4578	NaN	NaN	NaN	17	1826.9	0.0043175	119.69	ADDLEGEAFLPLREVPG	Q70J99;Q70J99-3	Q70J99	UNC13D	Protein unc-13 homolog D
NaN	NaN	NaN	NaN	25.5698	NaN	NaN	NaN	14	1645.92	1.21e-12	149.69	ADDLSKITKIMRQK	P35442	P35442	THBS2	Thrombospondin-2
NaN	NaN	NaN	NaN	24.6254	NaN	NaN	NaN	15	1774.96	0.024788	76.82	ADDLSKITKIMRQKE	P35442	P35442	THBS2	Thrombospondin-2
NaN	NaN	NaN	NaN	26.2689	NaN	NaN	NaN	16	1831.98	7.89e-08	151.04	ADDLSKITKIMRQKEG	P35442	P35442	THBS2	Thrombospondin-2
NaN	NaN	NaN	NaN	NaN	NaN	NaN	NaN	8	893.424	0.10059	86.472	ADEGISFR	Q06830	Q06830	PRDX1	Peroxiredoxin-1
NaN	NaN	23.7938	NaN	NaN	NaN	NaN	NaN	9	933.444	0.054026	81.784	ADEIPAATF	Q5IJ48-2;Q5IJ48;Q5IJ48-3	Q5IJ48-2	CRB2	Protein crumbs homolog 2
NaN	NaN	NaN	NaN	NaN	NaN	NaN	NaN	15	1802.9	1.21e-27	205.27	ADENYRPLAKTRQQN	Q15154;Q15154-2	Q15154	PCM1	Pericentriolar material 1 protein
NaN	NaN	NaN	NaN	20.3145	NaN	NaN	NaN	16	1711.85	0.36648	33.589	ADEPVWRSEQAIGAIA	O60486	O60486	PLXNC1	Plexin-C1
21.4159	23.306	NaN	NaN	NaN	NaN	NaN	NaN	8	992.46	0.075419	99.384	ADEVHYFL	P08567	P08567	PLEK	Pleckstrin
25.2924	26.3184	NaN	NaN	NaN	NaN	NaN	NaN	9	998.53	0.020764	118.32	ADFARVAHL	Q8WUY1	Q8WUY1	THEM6	Protein THEM6
25.5448	23.1853	NaN	NaN	NaN	NaN	NaN	NaN	8	915.409	0.029855	127.31	ADFEAHNI	P49915;P49915-2	P49915	GMPS	GMP synthase [glutamine-hydrolyzing]
27.2561	28.5305	NaN	NaN	NaN	NaN	NaN	NaN	8	967.443	0.043284	123.69	ADFETVRM	P61160;P61160-2	P61160	ACTR2	Actin-related protein 2
21.759	NaN	NaN	NaN	NaN	NaN	NaN	NaN	9	1003.55	0.14402	60.074	ADFGRLVNL	Q96AG4	Q96AG4	LRRC59	Leucine-rich repeat-containing protein 59
NaN	19.8141	NaN	NaN	NaN	NaN	NaN	NaN	9	1042.52	0.067323	72.928	ADFHRVEGL	Q92673	Q92673	SORL1	Sortilin-related receptor
21.1229	NaN	NaN	NaN	NaN	NaN	NaN	NaN	8	937.429	0.054731	106.04	ADFHSSKF	Q9UMZ2;Q9UMZ2-6;Q9UMZ2-8;Q9UMZ2-3;Q9UMZ2-7;Q9UMZ2-9;Q9UMZ2-4;Q9UMZ2-5	Q9UMZ2	SYNRG	Synergin gamma
21.3748	NaN	NaN	NaN	NaN	NaN	NaN	NaN	15	1753.86	0.000724	100.11	ADFIRESSEAQVQKF	Q9Y520;Q9Y520-2;Q9Y520-6;Q9Y520-4;Q9Y520-5;Q9Y520-7;Q9Y520-3	Q9Y520	PRRC2C	Protein PRRC2C
23.9815	NaN	NaN	NaN	NaN	NaN	NaN	NaN	8	891.445	2.94e-13	176.66	ADFKAQNV	O00505	O00505	KPNA3	Importin subunit alpha-4
NaN	NaN	23.4564	NaN	NaN	NaN	NaN	NaN	8	970.512	0.067929	98.582	ADFKVYTK	P21333;P21333-2	P21333	FLNA	Filamin-A
22.473	NaN	NaN	NaN	NaN	NaN	NaN	NaN	10	1256.61	0.083644	69.275	ADFPRPDHRF	Q14151	Q14151	SAFB2	Scaffold attachment factor B2
21.6596	23.809	NaN	NaN	NaN	NaN	NaN	NaN	9	1014.48	0.061478	80.219	ADFQHAVEV	O94903	O94903	PROSC	Proline synthase co-transcribed bacterial homolog protein
20.8303	NaN	NaN	NaN	NaN	NaN	NaN	NaN	8	925.466	0.16341	73.208	ADFRSALF	Q6ZXV5;Q6ZXV5-2	Q6ZXV5	TMTC3	Transmembrane and TPR repeat-containing protein 3
20.7888	NaN	NaN	NaN	NaN	NaN	NaN	NaN	9	1055.54	0.064837	76.827	ADFVRSKSF	Q6NV74	Q6NV74	KIAA1211L	Uncharacterized protein KIAA1211-like
NaN	NaN	22.6746	NaN	NaN	NaN	NaN	NaN	9	1029.5	0.016009	113.66	ADGARQQER	Q9BY27;Q14129;Q14129-2	Q9BY27	DGCR6L;DGCR6	Protein DGCR6L;Protein DGCR6
NaN	NaN	NaN	NaN	NaN	NaN	NaN	NaN	10	871.404	0.091048	64.42	ADGAVGPATN	O14893;O14893-3;O14893-2	O14893	GEMIN2	Gem-associated protein 2
NaN	NaN	NaN	NaN	NaN	NaN	NaN	NaN	24	2391.18	2.02e-128	258.34	ADGFSASYKTLPRGTAKEGQGPGP	Q15113	Q15113	PCOLCE	Procollagen C-endopeptidase enhancer 1
NaN	NaN	NaN	NaN	NaN	NaN	NaN	NaN	25	2519.28	1.64e-142	219.04	ADGFSASYKTLPRGTAKEGQGPGPK	Q15113	Q15113	PCOLCE	Procollagen C-endopeptidase enhancer 1
NaN	NaN	NaN	NaN	NaN	NaN	NaN	NaN	19	2049.23	0.0037021	86.453	ADGKGVVVVIKRRSGQRKP	P46779;P46779-2;P46779-3	P46779	RPL28	60S ribosomal protein L28
26.5178	NaN	NaN	NaN	NaN	NaN	NaN	NaN	9	982.52	0.01468	142.04	ADHARTITV	P49588;P49588-2	P49588	AARS	Alanine--tRNA ligase, cytoplasmic
NaN	NaN	NaN	NaN	NaN	NaN	NaN	NaN	9	950.457	0.012237	116.37	ADHGEPIGR	P08238;Q58FF7	P08238	HSP90AB1;HSP90AB3P	Heat shock protein HSP 90-beta;Putative heat shock protein HSP 90-beta-3
22.4949	NaN	NaN	NaN	NaN	NaN	NaN	NaN	9	1037.46	0.0060398	147.69	ADHIHSVEM	Q8NEJ0	Q8NEJ0	DUSP18	Dual specificity protein phosphatase 18
NaN	NaN	NaN	NaN	NaN	NaN	NaN	NaN	9	1046.56	0.078336	79.489	ADHIRSIHV	Q6ZN18;Q6ZN18-3;Q6ZN18-2	Q6ZN18	AEBP2	Zinc finger protein AEBP2
NaN	NaN	NaN	NaN	NaN	NaN	NaN	NaN	8	890.425	0.072591	85.357	ADHLAHEV	O95394;O95394-3;O95394-4	O95394	PGM3	Phosphoacetylglucosamine mutase
21.1842	NaN	NaN	NaN	NaN	NaN	NaN	NaN	9	1059.48	0.14961	50.607	ADHSHVFTF	P05186;P05186-2;P05186-3	P05186	ALPL	Alkaline phosphatase, tissue-nonspecific isozyme
NaN	NaN	NaN	NaN	NaN	NaN	NaN	NaN	8	814.382	0.027267	129.96	ADHVSSSL	Q69YN4;Q69YN4-3;Q69YN4-2;Q69YN4-4	Q69YN4	KIAA1429	Protein virilizer homolog
24.8503	NaN	NaN	NaN	NaN	NaN	NaN	NaN	8	1036.5	0.024539	132.76	ADHYKEKF	Q86VP1;Q86VP1-2;Q86VP1-3;Q86VP1-4	Q86VP1	TAX1BP1	Tax1-binding protein 1
NaN	24.9804	NaN	NaN	NaN	NaN	NaN	NaN	8	978.387	0.12138	81.297	ADHYSQQM	Q96PP9	Q96PP9	GBP4	Guanylate-binding protein 4
NaN	23.344	NaN	NaN	NaN	NaN	NaN	NaN	8	944.46	0.074289	95.957	ADHYVEVL	O75718	O75718	CRTAP	Cartilage-associated protein
NaN	NaN	22.1002	22.7639	NaN	NaN	NaN	NaN	8	830.402	0.11027	84.064	ADIDAVDI	P20749	P20749	BCL3	B-cell lymphoma 3 protein
NaN	NaN	23.4456	25.1767	NaN	NaN	NaN	NaN	10	1215.54	0.0033074	139.98	ADIDTRSEFY	P61160;P61160-2	P61160	ACTR2	Actin-related protein 2
24.6265	NaN	NaN	NaN	NaN	NaN	NaN	NaN	9	1041.67	0.023083	102.95	ADKARKKLL	P84098	P84098	RPL19	60S ribosomal protein L19
22.0872	NaN	NaN	NaN	NaN	NaN	NaN	NaN	11	1395.69	0.015913	86.014	ADKARYEREMK	P09429	P09429	HMGB1	High mobility group protein B1
NaN	NaN	NaN	NaN	NaN	NaN	NaN	NaN	8	860.472	0.080548	93.374	ADKASTRL	P35579;P35579-2	P35579	MYH9	Myosin-9
21.3835	NaN	NaN	NaN	NaN	NaN	NaN	NaN	8	932.533	0.16572	72.875	ADKFQVLL	Q9H0A8	Q9H0A8	COMMD4	COMM domain-containing protein 4
22.5778	NaN	NaN	NaN	NaN	NaN	NaN	NaN	8	964.477	0.025998	138.26	ADKGHYKF	O75179;O75179-7;O75179-6;O75179-2;Q8IWZ3;Q8IWZ3-6;Q8IWZ3-4	O75179	ANKRD17;ANKHD1	Ankyrin repeat domain-containing protein 17;Ankyrin repeat and KH domain-containing protein 1
22.1502	NaN	NaN	NaN	NaN	NaN	NaN	NaN	8	844.502	0.0089444	164.71	ADKIASKL	Q9NVN8	Q9NVN8	GNL3L	Guanine nucleotide-binding protein-like 3-like protein
25.8242	NaN	NaN	NaN	NaN	NaN	NaN	NaN	8	903.445	0.0094778	163.72	ADKIHSSF	P05120	P05120	SERPINB2	Plasminogen activator inhibitor 2
NaN	NaN	NaN	NaN	NaN	NaN	NaN	NaN	8	894.492	0.047971	110.14	ADKLHQAL	O76027	O76027	ANXA9	Annexin A9
NaN	NaN	NaN	NaN	NaN	NaN	NaN	NaN	9	1042.62	0.085062	60.436	ADKLIKIWG	P61964	P61964	WDR5	WD repeat-containing protein 5
22.4594	NaN	NaN	NaN	NaN	NaN	NaN	NaN	8	913.523	0.054556	113.91	ADKLIQNL	Q96FQ6	Q96FQ6	S100A16	Protein S100-A16
25.2814	NaN	NaN	NaN	NaN	NaN	NaN	NaN	8	967.538	0.1469	77.282	ADKLIYVF	Q8IXQ6;Q8IXQ6-2	Q8IXQ6	PARP9	Poly [ADP-ribose] polymerase 9
23.3064	NaN	NaN	NaN	NaN	NaN	NaN	NaN	8	971.54	1.97e-07	136.8	ADKLQERL	Q4V328;Q4V328-4;Q4V328-3;Q4V328-2	Q4V328	GRIPAP1	GRIP1-associated protein 1
NaN	25.5275	NaN	NaN	NaN	NaN	NaN	NaN	20	2206.06	8.64e-05	120.71	ADKLSFGLEDEPLETATKEN	O94905	O94905	ERLIN2	Erlin-2
22.9308	24.4777	NaN	NaN	NaN	NaN	NaN	NaN	8	920.533	0.02389	133.86	ADKLTVKF	Q9H583	Q9H583	HEATR1	HEAT repeat-containing protein 1;HEAT repeat-containing protein 1, N-terminally processed
NaN	NaN	22.6482	NaN	NaN	NaN	NaN	NaN	8	991.545	0.047174	117.39	ADKLVRQY	Q9BUJ2;Q9BUJ2-3;Q9BUJ2-4;Q9BUJ2-2;Q9BUJ2-5	Q9BUJ2	HNRNPUL1	Heterogeneous nuclear ribonucleoprotein U-like protein 1
22.0528	NaN	NaN	NaN	NaN	NaN	NaN	NaN	8	793.397	0.15528	75.213	ADKSAVGF	P14317	P14317	HCLS1	Hematopoietic lineage cell-specific protein
NaN	NaN	24.9447	24.2544	NaN	NaN	NaN	NaN	8	975.485	0.045927	111.65	ADKVHLMY	Q14258	Q14258	TRIM25	E3 ubiquitin/ISG15 ligase TRIM25
NaN	24.1026	NaN	NaN	NaN	NaN	NaN	NaN	9	1054.54	0.0093621	122.13	ADLARFYTV	Q96S38;Q96S38-2	Q96S38	RPS6KC1	Ribosomal protein S6 kinase delta-1
23.619	NaN	NaN	NaN	NaN	NaN	NaN	NaN	9	979.52	0.0086516	141.52	ADLARHAQV	Q8NAF0	Q8NAF0	ZNF579	Zinc finger protein 579
25.2796	27.5656	NaN	NaN	NaN	NaN	NaN	NaN	9	983.588	0.0046333	133.6	ADLARRLGL	Q9HBL8	Q9HBL8	NMRAL1	NmrA-like family domain-containing protein 1
20.5863	NaN	NaN	NaN	NaN	NaN	NaN	NaN	9	900.455	0.072359	74.301	ADLDVSGPK	Q09666	Q09666	AHNAK	Neuroblast differentiation-associated protein AHNAK
NaN	NaN	NaN	NaN	NaN	NaN	NaN	NaN	9	1003.48	0.008498	133.33	ADLERAQAM	Q15751	Q15751	HERC1	Probable E3 ubiquitin-protein ligase HERC1
23.3216	NaN	NaN	NaN	NaN	NaN	NaN	NaN	9	1157.55	0.012374	128.12	ADLERFFNF	Q9BQ89	Q9BQ89	FAM110A	Protein FAM110A
22.7519	25.6449	NaN	NaN	NaN	NaN	NaN	NaN	9	1070.55	0.072915	74.464	ADLERHAIF	Q63HN8-4;Q63HN8	Q63HN8-4	RNF213	E3 ubiquitin-protein ligase RNF213
21.8082	22.5374	NaN	NaN	NaN	NaN	NaN	NaN	9	984.56	0.028593	97.431	ADLERVLGL	Q2M3G4;Q2M3G4-2	Q2M3G4	SHROOM1	Protein Shroom1
24.1071	22.8848	NaN	NaN	NaN	NaN	NaN	NaN	8	932.472	0.028339	148.54	ADLIHHDL	Q9UHV7	Q9UHV7	MED13	Mediator of RNA polymerase II transcription subunit 13
NaN	NaN	NaN	NaN	NaN	NaN	NaN	NaN	12	1241.7	0.063309	97.456	ADLINNLGTIAK	P07900;P07900-2;Q14568;P08238;Q58FF8	P07900	HSP90AA1;HSP90AA2P;HSP90AB1;HSP90AB2P	Heat shock protein HSP 90-alpha;Heat shock protein HSP 90-alpha A2;Heat shock protein HSP 90-beta;Putative heat shock protein HSP 90-beta 2
23.3326	26.1551	NaN	NaN	NaN	NaN	NaN	NaN	9	1132.6	0.036931	91.069	ADLIRHVYF	Q9BQA5;Q9BQA5-2	Q9BQA5	HINFP	Histone H4 transcription factor
20.7545	NaN	NaN	NaN	NaN	NaN	NaN	NaN	9	1066.53	0.10793	66.692	ADLIRMAFM	Q86XA9;Q86XA9-2	Q86XA9	HEATR5A	HEAT repeat-containing protein 5A
21.7392	NaN	NaN	NaN	NaN	NaN	NaN	NaN	9	1130.59	0.13125	62.104	ADLIRQREM	Q8IV04;Q8IV04-2	Q8IV04	TBC1D10C	Carabin
NaN	NaN	NaN	NaN	NaN	NaN	NaN	NaN	8	871.513	0.034691	111.01	ADLITRAI	O43524	O43524	FOXO3	Forkhead box protein O3
NaN	NaN	NaN	NaN	NaN	NaN	NaN	NaN	9	1090.6	0.050307	83.623	ADLKKQELF	Q9H583	Q9H583	HEATR1	HEAT repeat-containing protein 1;HEAT repeat-containing protein 1, N-terminally processed
NaN	20.4257	NaN	NaN	NaN	NaN	NaN	NaN	8	1020.54	0.067888	83.364	ADLKKYHF	O95352;O95352-2	O95352	ATG7	Ubiquitin-like modifier-activating enzyme ATG7
21.3682	NaN	NaN	NaN	NaN	NaN	NaN	NaN	9	1113.59	0.034186	84.213	ADLKRHVEF	Q96F24;Q96F24-3;Q96F24-2	Q96F24	NRBF2	Nuclear receptor-binding factor 2
NaN	NaN	NaN	NaN	NaN	NaN	NaN	NaN	9	1055.6	0.0015374	129.68	ADLLDRQIL	O95365	O95365	ZBTB7A	Zinc finger and BTB domain-containing protein 7A
NaN	NaN	NaN	NaN	22.2816	NaN	NaN	NaN	16	1875.98	0.0049329	98.694	ADLLDYIKALNRNSDR	P00492	P00492	HPRT1	Hypoxanthine-guanine phosphoribosyltransferase
23.1076	NaN	NaN	NaN	NaN	NaN	NaN	NaN	8	996.528	0.1037	88.904	ADLLKQYF	Q92502;Q92502-2	Q92502	STARD8	StAR-related lipid transfer protein 8
24.0026	26.0657	NaN	NaN	NaN	NaN	NaN	NaN	8	932.544	0.022329	141.83	ADLLKRAF	P78527;P78527-2	P78527	PRKDC	DNA-dependent protein kinase catalytic subunit
NaN	NaN	NaN	NaN	NaN	NaN	NaN	NaN	15	1568.88	0.089966	61.353	ADLLLPPDIISKAFG	Q5VUA4	Q5VUA4	ZNF318	Zinc finger protein 318
NaN	NaN	NaN	NaN	NaN	NaN	NaN	NaN	21	2309.19	0.00097965	85.974	ADLLLSTQPGREEGSPLELER	P08195;P08195-3;P08195-2;P08195-4	P08195	SLC3A2	4F2 cell-surface antigen heavy chain
24.2788	NaN	NaN	NaN	NaN	NaN	NaN	NaN	8	845.44	0.057281	111.28	ADLPARGF	Q8TCT7;Q8TCT7-4;Q8TCT7-2	Q8TCT7	SPPL2B	Signal peptide peptidase-like 2B
NaN	24.9589	NaN	NaN	NaN	NaN	NaN	NaN	9	1026.55	0.052232	72.23	ADLPHSFKL	Q96M96	Q96M96	FGD4	FYVE, RhoGEF and PH domain-containing protein 4
23.0842	26.2903	NaN	NaN	NaN	NaN	NaN	NaN	9	1041.56	0.02628	98.933	ADLPRNIML	Q5S007	Q5S007	LRRK2	Leucine-rich repeat serine/threonine-protein kinase 2
18.479	NaN	NaN	NaN	NaN	NaN	NaN	NaN	9	1051.58	0.014718	99.568	ADLRHKEAL	Q9C0D2;Q9C0D2-3	Q9C0D2	CEP295	Centrosomal protein of 295 kDa
26.1604	NaN	NaN	NaN	NaN	NaN	NaN	NaN	9	1054.62	0.020724	116.25	ADLRRAIQL	P54252;P54252-2;P54252-5;P54252-3;P54252-4	P54252	ATXN3	Ataxin-3
NaN	NaN	NaN	NaN	NaN	NaN	NaN	NaN	9	1175.65	0.023223	101.9	ADLRRRDKF	Q8NB46	Q8NB46	ANKRD52	Serine/threonine-protein phosphatase 6 regulatory ankyrin repeat subunit C
24.354	26.8847	NaN	NaN	NaN	NaN	NaN	NaN	9	930.513	0.0089035	128.12	ADLSRAVSL	Q6PIY7;Q6PIY7-2	Q6PIY7	PAPD4	Poly(A) RNA polymerase GLD2
NaN	NaN	23.8104	NaN	NaN	NaN	NaN	NaN	10	1049.54	0.11035	71.501	ADLTGQVALY	Q9NPI6;Q9NPI6-2	Q9NPI6	DCP1A	mRNA-decapping enzyme 1A
NaN	NaN	NaN	NaN	NaN	NaN	NaN	NaN	9	989.551	0.0077224	139.02	ADLTRSKSL	Q8N8E3	Q8N8E3	CEP112	Centrosomal protein of 112 kDa
25.2489	20.6023	NaN	NaN	NaN	NaN	NaN	NaN	9	961.498	0.0015467	167.24	ADLVHSAHL	Q96S97	Q96S97	MYADM	Myeloid-associated differentiation marker
19.7415	NaN	NaN	NaN	NaN	NaN	NaN	NaN	9	984.56	0.10677	78.264	ADLVREAVI	Q9P260;Q9P260-2	Q9P260	KIAA1468	LisH domain and HEAT repeat-containing protein KIAA1468
22.9606	24.1343	NaN	NaN	NaN	NaN	NaN	NaN	9	1004.57	0.020811	110.67	ADLYRVLGV	Q8WXX5	Q8WXX5	DNAJC9	DnaJ homolog subfamily C member 9
26.6872	26.8771	NaN	NaN	NaN	NaN	NaN	NaN	9	913.433	0.0015298	164.52	ADMAHISGL	P34896;P34896-2;P34896-3;P34896-4;P34897;P34897-3;P34897-2	P34896	SHMT1;SHMT2	Serine hydroxymethyltransferase, cytosolic;Serine hydroxymethyltransferase, mitochondrial
23.8374	22.2981	NaN	NaN	NaN	NaN	NaN	NaN	9	1122.56	0.043819	74.376	ADMAKRERF	Q9NW13;Q9NW13-2	Q9NW13	RBM28	RNA-binding protein 28
26.8838	21.851	NaN	NaN	NaN	NaN	NaN	NaN	8	933.438	0.037061	120.49	ADMGHLKY	P12004	P12004	PCNA	Proliferating cell nuclear antigen
22.4325	NaN	NaN	NaN	NaN	NaN	NaN	NaN	8	946.422	0.082047	95.793	ADMLVHDF	Q8N108;Q8N108-16;Q8N108-14;Q8N108-18;Q8N108-15;Q8N108-13;Q8N108-12;Q8N108-20	Q8N108	MIER1	Mesoderm induction early response protein 1
25.5909	25.2973	NaN	NaN	NaN	NaN	NaN	NaN	8	842.396	0.045165	122.15	ADMSHVAL	P53621;P53621-2	P53621	COPA	Coatomer subunit alpha;Xenin;Proxenin
24.726	26.9562	NaN	NaN	NaN	NaN	NaN	NaN	9	955.48	0.019586	116.11	ADMSHVALL	P53621;P53621-2	P53621	COPA	Coatomer subunit alpha;Xenin;Proxenin
25.6803	27.0723	NaN	NaN	NaN	NaN	NaN	NaN	9	1052.5	0.0012404	160.26	ADNARVNFF	O60231	O60231	DHX16	Putative pre-mRNA-splicing factor ATP-dependent RNA helicase DHX16
NaN	NaN	NaN	NaN	24.3154	21.0548	21.4747	20.9664	16	1658.81	6.92e-14	166.65	ADNGFLSHNFLTVAPG	Q68CZ2;Q68CZ2-2	Q68CZ2	TNS3	Tensin-3
NaN	NaN	NaN	NaN	22.364	NaN	NaN	NaN	18	1882.9	0.0010236	104.78	ADNGFLSHNFLTVAPGHS	Q68CZ2;Q68CZ2-2	Q68CZ2	TNS3	Tensin-3
25.0077	26.8344	NaN	NaN	NaN	NaN	NaN	NaN	9	1018.54	0.0025859	156.75	ADNIKAQLF	Q969Q5	Q969Q5	RAB24	Ras-related protein Rab-24
NaN	NaN	NaN	NaN	NaN	NaN	NaN	NaN	8	825.398	0.10954	84.244	ADNISHGL	Q01432;Q01432-5;Q01432-4;Q01432-6;Q01432-3	Q01432	AMPD3	AMP deaminase 3
NaN	NaN	NaN	NaN	NaN	NaN	NaN	NaN	9	957.488	0.00069362	176.43	ADNLRAEGL	P04275	P04275	VWF	von Willebrand factor;von Willebrand antigen 2
26.0173	NaN	NaN	NaN	NaN	NaN	NaN	NaN	9	1040.6	0.0016231	164.71	ADNLRLIQV	Q9UI30	Q9UI30	TRMT112	Multifunctional methyltransferase subunit TRM112-like protein
24.4745	22.8764	NaN	NaN	NaN	NaN	NaN	NaN	8	835.419	0.025663	138.55	ADNPHVAL	Q9Y4L1;Q9Y4L1-2	Q9Y4L1	HYOU1	Hypoxia up-regulated protein 1
23.2641	NaN	NaN	NaN	NaN	NaN	NaN	NaN	8	906.456	0.030858	126.28	ADNSVVRF	P21333;P21333-2	P21333	FLNA	Filamin-A
NaN	NaN	NaN	NaN	NaN	NaN	23.5787	NaN	17	1976.96	0.0021437	105.02	ADNSVVRFLPREEGPYE	P21333;P21333-2	P21333	FLNA	Filamin-A
NaN	NaN	NaN	NaN	NaN	NaN	NaN	NaN	15	1754.93	0.013984	88.706	ADPNIRFLDKLPQQT	Q86WV6	Q86WV6	TMEM173	Stimulator of interferon genes protein
NaN	NaN	NaN	NaN	NaN	NaN	NaN	NaN	16	1811.95	0.011689	87.647	ADPNIRFLDKLPQQTG	Q86WV6	Q86WV6	TMEM173	Stimulator of interferon genes protein
NaN	NaN	NaN	NaN	NaN	NaN	NaN	NaN	17	1926.98	0.0023364	81.594	ADPNIRFLDKLPQQTGD	Q86WV6	Q86WV6	TMEM173	Stimulator of interferon genes protein
NaN	NaN	25.2895	NaN	NaN	NaN	NaN	NaN	8	922.473	0.058533	113.7	ADPTAHRR	Q63ZY3;Q63ZY3-2;Q63ZY3-3	Q63ZY3	KANK2	KN motif and ankyrin repeat domain-containing protein 2
NaN	NaN	NaN	NaN	21.5002	NaN	NaN	NaN	13	1439.65	0.042396	84.658	ADPWFQVDAGHPT	Q96SM3	Q96SM3	CPXM1	Probable carboxypeptidase X1
24.0676	NaN	NaN	NaN	NaN	NaN	NaN	NaN	8	886.512	0.04986	118.32	ADQIVTKL	P11388;P11388-2;P11388-3;P11388-4	P11388	TOP2A	DNA topoisomerase 2-alpha
NaN	24.8629	NaN	NaN	NaN	NaN	NaN	NaN	8	934.524	0.043975	113.5	ADQKKAKF	Q14562	Q14562	DHX8	ATP-dependent RNA helicase DHX8
22.7925	NaN	NaN	NaN	NaN	NaN	NaN	NaN	9	1034.55	0.073543	85.862	ADQKRFSAL	Q9BZQ8	Q9BZQ8	FAM129A	Protein Niban
26.3039	26.865	NaN	NaN	NaN	NaN	NaN	NaN	9	1111.57	0.0015222	143.7	ADQLRFSYL	P18031	P18031	PTPN1	Tyrosine-protein phosphatase non-receptor type 1
NaN	NaN	NaN	NaN	NaN	NaN	NaN	NaN	9	1142.62	0.10738	64.654	ADQQRREKL	Q9P0W8;Q9P0W8-3;Q9P0W8-2	Q9P0W8	SPATA7	Spermatogenesis-associated protein 7
NaN	NaN	NaN	NaN	NaN	NaN	NaN	NaN	9	989.514	0.017925	107.69	ADQSRLTSL	Q9UHY1	Q9UHY1	NRBP1	Nuclear receptor-binding protein
NaN	NaN	NaN	NaN	NaN	NaN	NaN	NaN	9	975.481	0.011247	118.33	ADQSRVGLM	Q8IV36;Q8IV36-3;Q8IV36-2	Q8IV36	HID1	Protein HID1
25.1028	NaN	NaN	NaN	NaN	NaN	NaN	NaN	9	1055.51	0.014244	122.19	ADRARYSAF	Q96PK6-5;Q9BWF3	Q96PK6-5	RBM14;RBM4	RNA-binding protein 14;RNA-binding protein 4
23.147	NaN	NaN	NaN	NaN	NaN	NaN	NaN	9	1071.6	0.019676	115.71	ADRERILSL	Q96G42	Q96G42	KLHDC7B	Kelch domain-containing protein 7B
NaN	NaN	NaN	NaN	NaN	NaN	NaN	NaN	8	859.44	0.070316	79.469	ADRETVAV	O60841	O60841	EIF5B	Eukaryotic translation initiation factor 5B
23.0583	NaN	NaN	NaN	NaN	NaN	NaN	NaN	9	1032.58	0.021847	96.492	ADRKRAIGF	P49750;P49750-4	P49750	YLPM1	YLP motif-containing protein 1
25.5099	NaN	NaN	NaN	NaN	NaN	NaN	NaN	8	890.428	0.013547	152.41	ADRLQTGM	P27635;Q96L21	P27635	RPL10;RPL10L	60S ribosomal protein L10;60S ribosomal protein L10-like
NaN	21.039	NaN	NaN	NaN	NaN	NaN	NaN	9	1036.48	0.070936	75.043	ADSARFEEL	Q9NWS0;Q9NWS0-2;Q9NWS0-3	Q9NWS0	PIH1D1	PIH1 domain-containing protein 1
NaN	NaN	NaN	NaN	NaN	NaN	NaN	NaN	8	846.42	0.061914	101.69	ADSASQRL	Q9UHV7	Q9UHV7	MED13	Mediator of RNA polymerase II transcription subunit 13
25.4632	23.8374	NaN	NaN	NaN	NaN	NaN	NaN	8	845.461	0.013572	152.34	ADSATRLL	P27105	P27105	STOM	Erythrocyte band 7 integral membrane protein
19.5451	NaN	NaN	NaN	NaN	NaN	NaN	NaN	8	702.355	0.054328	106.29	ADSAVAGL	Q6UWH4;Q6UWH4-3;Q6UWH4-2	Q6UWH4	FAM198B	Protein FAM198B
21.0514	NaN	NaN	NaN	NaN	NaN	NaN	NaN	8	782.345	0.056007	105.27	ADSAVSSF	P35398;P35398-4;P35398-3;P35398-1	P35398	RORA	Nuclear receptor ROR-alpha
NaN	NaN	NaN	NaN	NaN	NaN	NaN	NaN	9	901.439	0.022422	102.77	ADSEALPSL	Q9Y600;Q9Y600-2;Q9Y600-3	Q9Y600	CSAD	Cysteine sulfinic acid decarboxylase
NaN	NaN	NaN	NaN	NaN	NaN	NaN	NaN	8	910.44	0.022661	137.9	ADSEKKSF	O75460	O75460	ERN1	Serine/threonine-protein kinase/endoribonuclease IRE1;Serine/threonine-protein kinase;Endoribonuclease
20.3775	NaN	NaN	NaN	NaN	NaN	NaN	NaN	9	1043.56	0.02042	112.41	ADSERLLQL	Q15027	Q15027	ACAP1	Arf-GAP with coiled-coil, ANK repeat and PH domain-containing protein 1
25.6303	27.8165	NaN	NaN	NaN	NaN	NaN	NaN	9	1091.5	0.0021258	139.14	ADSFHLQQF	Q13813;Q13813-3;Q13813-2	Q13813	SPTAN1	Spectrin alpha chain, non-erythrocytic 1
24.3771	25.7619	NaN	NaN	NaN	NaN	NaN	NaN	9	1062.47	0.0023897	169.09	ADSFKADYF	P41229;P41229-3;P41229-2;P41229-5;P41229-4	P41229	KDM5C	Lysine-specific demethylase 5C
NaN	NaN	23.4837	NaN	NaN	NaN	NaN	NaN	9	904.45	0.064047	77.058	ADSGEKVSL	Q9GZZ6	Q9GZZ6	CHRNA10	Neuronal acetylcholine receptor subunit alpha-10
NaN	NaN	NaN	NaN	NaN	NaN	NaN	NaN	8	886.357	0.059724	103.02	ADSHSSHF	Q9NV58;Q9NV58-3	Q9NV58	RNF19A	E3 ubiquitin-protein ligase RNF19A
NaN	NaN	NaN	NaN	NaN	NaN	NaN	NaN	8	952.393	0.092137	88.591	ADSHTEFF	Q9BZF2	Q9BZF2	OSBPL7	Oxysterol-binding protein-related protein 7
21.5845	NaN	NaN	NaN	NaN	NaN	NaN	NaN	10	1043.56	0.0087891	121.58	ADSIKNGVQL	Q6PD62	Q6PD62	CTR9	RNA polymerase-associated protein CTR9 homolog
23.6691	NaN	NaN	NaN	NaN	NaN	NaN	NaN	9	1058.54	0.0027123	154.12	ADSIRQQEL	Q9BV73;Q9BV73-2	Q9BV73	CEP250	Centrosome-associated protein CEP250
NaN	NaN	NaN	NaN	NaN	NaN	NaN	NaN	8	851.369	0.034076	122.98	ADSITNTM	Q9Y4J8;Q9Y4J8-11;O60941;Q9Y4J8-14;Q9Y4J8-6;Q9Y4J8-10;O60941-6;O60941-7;Q9Y4J8-13;Q9Y4J8-2;Q9Y4J8-15	Q9Y4J8	DTNA;DTNB	Dystrobrevin alpha;Dystrobrevin beta
NaN	27.0495	NaN	NaN	NaN	NaN	NaN	NaN	9	1036.53	0.012298	110.76	ADSKKREGF	Q92835;Q92835-2;Q92835-3	Q92835	INPP5D	Phosphatidylinositol 3,4,5-trisphosphate 5-phosphatase 1
27.0333	26.0813	NaN	NaN	NaN	NaN	NaN	NaN	9	1035.53	0.0012876	148.27	ADSKRAFEL	Q14254	Q14254	FLOT2	Flotillin-2
NaN	NaN	NaN	NaN	NaN	NaN	NaN	NaN	9	1002.58	0.032407	88.177	ADSKRKSVL	P12111;P12111-2;P12111-4	P12111	COL6A3	Collagen alpha-3(VI) chain
24.135	NaN	NaN	NaN	NaN	NaN	NaN	NaN	8	889.429	0.075754	95.352	ADSKSVHF	Q6ZMI0;Q6ZMI0-5;Q6ZMI0-2	Q6ZMI0	PPP1R21	Protein phosphatase 1 regulatory subunit 21
20.5	NaN	NaN	NaN	NaN	NaN	NaN	NaN	8	860.497	0.03797	119.21	ADSKTVKL	Q9P275;Q9P275-2	Q9P275	USP36	Ubiquitin carboxyl-terminal hydrolase 36
22.5173	17.9471	NaN	NaN	NaN	NaN	NaN	NaN	8	891.507	0.066072	104.45	ADSKVLLF	Q9P2L0;Q9P2L0-2	Q9P2L0	WDR35	WD repeat-containing protein 35
23.9017	26.6024	NaN	NaN	NaN	NaN	NaN	NaN	9	980.54	0.0021326	155.03	ADSLHRLGL	P49815;P49815-3;P49815-4;P49815-7;P49815-6;P49815-5;P49815-2	P49815	TSC2	Tuberin
19.7327	NaN	NaN	NaN	NaN	NaN	NaN	NaN	9	1111.57	0.01995	114.5	ADSLRFYQL	Q86V42;Q86V42-3;Q86V42-2	Q86V42	FAM124A	Protein FAM124A
28.0934	29.1342	NaN	NaN	NaN	NaN	NaN	NaN	9	1042.58	6.78e-08	205.7	ADSLRLQQL	Q13813;Q13813-3;Q13813-2	Q13813	SPTAN1	Spectrin alpha chain, non-erythrocytic 1
NaN	NaN	NaN	NaN	NaN	NaN	NaN	NaN	8	908.399	0.022882	137.18	ADSNAREF	O94776	O94776	MTA2	Metastasis-associated protein MTA2
NaN	NaN	NaN	NaN	NaN	NaN	NaN	NaN	9	918.441	0.052285	89.698	ADSPRSSTV	Q9UNY4	Q9UNY4	TTF2	Transcription termination factor 2
27.259	NaN	NaN	NaN	NaN	NaN	NaN	NaN	9	942.513	0.03229	106.42	ADSPRTALL	Q5TIA1;Q5TIA1-7;Q5TIA1-5;Q5TIA1-3;Q5TIA1-2	Q5TIA1	MEI1	Meiosis inhibitor protein 1
22.4157	22.4789	NaN	NaN	NaN	NaN	NaN	NaN	8	808.324	0.0080255	170.31	ADSPSEGF	Q6ZSZ5;Q6ZSZ5-2	Q6ZSZ5	ARHGEF18	Rho guanine nucleotide exchange factor 18
NaN	NaN	22.0719	21.5831	NaN	NaN	NaN	NaN	9	993.484	0.091284	69.093	ADSPVLMVY	P14866;P14866-2	P14866	HNRNPL	Heterogeneous nuclear ribonucleoprotein L
23.8195	NaN	NaN	NaN	NaN	NaN	NaN	NaN	9	1153.56	0.0089247	111.95	ADSQRFRQF	Q96SB8;Q96SB8-2	Q96SB8	SMC6	Structural maintenance of chromosomes protein 6
NaN	NaN	NaN	NaN	NaN	NaN	NaN	NaN	17	1839.94	0.054855	62.258	ADSTEFRPNAPVPLVID	Q9NRF8	Q9NRF8	CTPS2	CTP synthase 2
20.7464	NaN	NaN	NaN	NaN	NaN	NaN	NaN	8	844.372	0.085116	94.669	ADSTPAHF	Q7Z3E1	Q7Z3E1	TIPARP	TCDD-inducible poly [ADP-ribose] polymerase
NaN	NaN	NaN	NaN	NaN	NaN	NaN	NaN	8	778.334	0.056007	105.27	ADSTSEGL	Q27J81;Q27J81-2	Q27J81	INF2	Inverted formin-2
NaN	NaN	NaN	NaN	NaN	NaN	NaN	NaN	8	816.434	0.023831	134.06	ADSVANKL	Q8TE49;Q8TE49-2;Q6GQQ9;Q6GQQ9-2	Q8TE49	OTUD7A;OTUD7B	OTU domain-containing protein 7A;OTU domain-containing protein 7B
NaN	NaN	NaN	NaN	NaN	NaN	NaN	NaN	8	834.398	0.035169	121.87	ADSVGHHL	Q92973;Q92973-2;Q92973-3;O14787-2;O14787	Q92973	TNPO1;TNPO2	Transportin-1;Transportin-2
22.2845	NaN	NaN	NaN	NaN	NaN	NaN	NaN	8	878.461	0.021111	143	ADSVKGRF	A0A0B4J1V1;P01763;P01762;P01782;A0A0B4J1X8;A0A075B6Q5;A0A0B4J1X5;A0A0C4DH42;P01767;P01772;P01768;P01764	A0A0C4DH42	IGHV3-21;IGHV3-43;IGHV3-64;IGHV3-74;IGHV3-66;IGHV3-23	Ig heavy chain V-III region WEA;Ig heavy chain V-III region TRO;Ig heavy chain V-III region DOB;Ig heavy chain V-III region BUT;Ig heavy chain V-III region KOL;Ig heavy chain V-III region CAM;Ig heavy chain V-III region 23
NaN	NaN	NaN	NaN	NaN	NaN	NaN	NaN	9	916.498	0.012399	116.05	ADSVRAISV	Q8NDA8;Q8NDA8-2;Q8NDA8-7	Q8NDA8	MROH1	Maestro heat-like repeat-containing protein family member 1
NaN	NaN	NaN	NaN	NaN	NaN	NaN	NaN	9	947.467	0.045088	86.205	ADSVRSSNL	A6QL63;A6QL63-3;A6QL63-2	A6QL63	BTBD11	Ankyrin repeat and BTB/POZ domain-containing protein BTBD11
NaN	NaN	22.2383	NaN	NaN	NaN	NaN	NaN	9	861.444	0.037043	90.986	ADSVTGLSL	Q96DI7;Q96DI7-2	Q96DI7	SNRNP40	U5 small nuclear ribonucleoprotein 40 kDa protein
25.1796	NaN	NaN	NaN	NaN	NaN	NaN	NaN	8	814.48	0.091485	92.692	ADSVVVLL	Q92900;Q92900-2	Q92900	UPF1	Regulator of nonsense transcripts 1
NaN	NaN	21.6521	23.8466	NaN	NaN	NaN	NaN	10	1073.55	5.76e-48	247.75	ADTAAQITQR	P30491;P10319;P30685;P30484;P18465;P18463;P30480;P30460;P30481;P30487;P30490;P18464;P30498;P30492;P30495;P30493;P30508;Q29960-2;Q29960;Q07000;Q29865;P30499;Q29963;Q31612;Q95365;Q29836;P30475;P30462;P10321	P18463	HLA-B;HLA-C	HLA class I histocompatibility antigen, B-53 alpha chain;HLA class I histocompatibility antigen, B-58 alpha chain;HLA class I histocompatibility antigen, B-35 alpha chain;HLA class I histocompatibility antigen, B-46 alpha chain;HLA class I histocompatibility antigen, B-57 alpha chain;HLA class I histocompatibility antigen, B-37 alpha chain;HLA class I histocompatibility antigen, B-42 alpha chain;…
20.8871	23.5074	NaN	NaN	NaN	NaN	NaN	NaN	9	954.456	0.0044144	143.61	ADTFRAGAF	P61011;P61011-2	P61011	SRP54	Signal recognition particle 54 kDa protein
23.5657	NaN	NaN	NaN	NaN	NaN	NaN	NaN	8	936.466	0.013547	152.41	ADTFTRNL	Q03518	Q03518	TAP1	Antigen peptide transporter 1
22.2421	23.7692	NaN	NaN	NaN	NaN	NaN	NaN	8	830.392	0.051479	116.87	ADTGHAFL	Q9Y618;Q9Y618-3;Q9Y618-5;Q9Y618-4;Q9Y618-2	Q9Y618	NCOR2	Nuclear receptor corepressor 2
25.0722	NaN	NaN	NaN	NaN	NaN	NaN	NaN	8	893.486	0.054977	113.5	ADTLVTKF	Q9NUJ1;Q9NUJ1-3;Q9NUJ1-2	Q9NUJ1	ABHD10	Mycophenolic acid acyl-glucuronide esterase, mitochondrial
NaN	NaN	NaN	NaN	NaN	NaN	NaN	NaN	9	1133.63	0.10738	64.654	ADTQRRFKL	P05156	P05156	CFI	Complement factor I;Complement factor I heavy chain;Complement factor I light chain
NaN	NaN	NaN	22.064	NaN	NaN	NaN	NaN	8	832.381	0.11338	83.287	ADTTELSP	O14827	O14827	RASGRF2	Ras-specific guanine nucleotide-releasing factor 2
NaN	NaN	NaN	NaN	NaN	NaN	NaN	NaN	8	844.393	0.099125	86.838	ADTTHTSL	Q13608;Q13608-3;Q13608-2	Q13608	PEX6	Peroxisome assembly factor 2
21.612	NaN	NaN	NaN	NaN	NaN	NaN	NaN	8	903.445	0.029331	127.84	ADTVSHKF	Q9UPM8;Q9UPM8-2	Q9UPM8	AP4E1	AP-4 complex subunit epsilon-1
NaN	24.262	NaN	NaN	NaN	NaN	NaN	NaN	9	1083.62	0.064086	64.711	ADVKHVFRL	Q63HN8-4;Q63HN8	Q63HN8-4	RNF213	E3 ubiquitin-protein ligase RNF213
27.5442	28.7163	NaN	NaN	NaN	NaN	NaN	NaN	9	1018.57	0.0073565	128.36	ADVLKVEVF	P56537;P56537-2	P56537	EIF6	Eukaryotic translation initiation factor 6
24.913	24.0575	NaN	NaN	NaN	NaN	NaN	NaN	8	921.54	0.031859	125.25	ADVLVHRL	Q8IYB7	Q8IYB7	DIS3L2	DIS3-like exonuclease 2
NaN	NaN	NaN	26.1853	NaN	NaN	NaN	NaN	9	959.504	0.033809	93.374	ADVSLRNSV	Q13085;Q13085-4;Q13085-3;Q13085-2	Q13085	ACACA	Acetyl-CoA carboxylase 1;Biotin carboxylase
21.084	22.8665	NaN	NaN	NaN	NaN	NaN	NaN	9	1119.54	0.0087022	130.75	ADWIRISEM	Q96G46;Q96G46-3	Q96G46	DUS3L	tRNA-dihydrouridine(47) synthase [NAD(P)(+)]-like
20.933	NaN	NaN	NaN	NaN	NaN	NaN	NaN	8	880.429	0.059722	108.92	ADYASKNL	Q14139;Q14139-2	Q14139	UBE4A	Ubiquitin conjugation factor E4 A
22.4814	NaN	NaN	NaN	NaN	NaN	NaN	NaN	9	1030.44	0.12843	62.659	ADYIMANSF	Q9UEY8;Q9UEY8-2	Q9UEY8	ADD3	Gamma-adducin
24.8416	22.9406	NaN	NaN	NaN	NaN	NaN	NaN	9	1025.51	0.0019369	154.28	ADYKRSSSL	Q8NF50;Q8NF50-4;Q8NF50-3;Q8NF50-2	Q8NF50	DOCK8	Dedicator of cytokinesis protein 8
24.2835	26.7641	NaN	NaN	NaN	NaN	NaN	NaN	8	904.429	0.035663	129.96	ADYLSSHL	Q9BRJ7;Q9BRJ7-2	Q9BRJ7	NUDT16L1	Protein syndesmos
NaN	NaN	NaN	NaN	NaN	NaN	NaN	NaN	9	1086.51	0.088022	68.422	ADYQLHNVQ	Q8J025	Q8J025	APCDD1	Protein APCDD1
NaN	NaN	24.5797	21.4115	NaN	NaN	NaN	NaN	10	1256.64	0.0071831	105.2	ADYQQTIKKY	Q14203;Q14203-6;Q14203-3;Q14203-4;Q14203-5;Q14203-2	Q14203	DCTN1	Dynactin subunit 1
26.4419	29.6633	NaN	NaN	NaN	NaN	NaN	NaN	9	973.487	0.0013172	167.82	ADYVHSLGL	P17050	P17050	NAGA	Alpha-N-acetylgalactosaminidase
NaN	NaN	25.9477	25.2522	NaN	NaN	NaN	NaN	9	848.439	0.026923	98.458	AEAAAAAKF	P08195;P08195-3;P08195-2;P08195-4	P08195	SLC3A2	4F2 cell-surface antigen heavy chain
NaN	NaN	23.0787	22.2845	NaN	NaN	NaN	NaN	9	817.397	0.093364	68.485	AEAAAAPAF	Q9P2E5;Q9P2E5-2	Q9P2E5	CHPF2	Chondroitin sulfate glucuronyltransferase
NaN	NaN	25.0792	24.9042	NaN	NaN	NaN	NaN	9	915.397	0.037483	90.661	AEAAASAYY	Q969T9	Q969T9	WBP2	WW domain-binding protein 2
NaN	NaN	NaN	NaN	NaN	NaN	NaN	NaN	10	1069.61	0.025543	101.64	AEAAEVILRV	P78371;P78371-2	P78371	CCT2	T-complex protein 1 subunit beta
NaN	NaN	25.3712	NaN	NaN	NaN	NaN	NaN	10	1041.56	0.11857	69.812	AEAAGLHKVF	Q02880;Q02880-2	Q02880	TOP2B	DNA topoisomerase 2-beta
NaN	NaN	24.7574	NaN	NaN	NaN	NaN	NaN	9	957.549	0.014389	112.11	AEAALKKEV	Q9NXG2	Q9NXG2	THUMPD1	THUMP domain-containing protein 1
NaN	NaN	23.3268	NaN	NaN	NaN	NaN	NaN	9	947.435	0.0097542	121.29	AEAALSHSY	Q07002;Q07002-3;Q07002-2	Q07002	CDK18	Cyclin-dependent kinase 18
NaN	NaN	22.5588	NaN	NaN	NaN	NaN	NaN	10	1094.5	0.12156	69.198	AEAALSHSYF	Q07002;Q07002-3;Q07002-2	Q07002	CDK18	Cyclin-dependent kinase 18
NaN	NaN	23.2671	NaN	NaN	NaN	NaN	NaN	9	942.488	0.091001	69.176	AEAAQQLGR	Q96NA2;Q96NA2-2	Q96NA2	RILP	Rab-interacting lysosomal protein
NaN	NaN	22.9745	21.8845	NaN	NaN	NaN	NaN	9	891.434	0.091284	69.093	AEAATPYGI	O75533	O75533	SF3B1	Splicing factor 3B subunit 1
NaN	NaN	NaN	NaN	NaN	NaN	NaN	NaN	11	1058.54	0.023294	103.7	AEADGGLARTV	Q8NC60	Q8NC60	NOA1	Nitric oxide-associated protein 1
NaN	NaN	24.7353	24.5591	NaN	NaN	NaN	NaN	9	1042.5	0.107	65.305	AEADKIYSF	O15014	O15014	ZNF609	Zinc finger protein 609
NaN	NaN	26.652	NaN	NaN	NaN	NaN	NaN	9	1054.59	0.013038	101.64	AEADKPRRL	Q9NZM5	Q9NZM5	GLTSCR2	Glioma tumor suppressor candidate region gene 2 protein
NaN	NaN	NaN	NaN	NaN	NaN	NaN	NaN	9	973.544	0.0085121	148.52	AEADKTIKV	O43660;O43660-2	O43660	PLRG1	Pleiotropic regulator 1
NaN	NaN	27.8318	24.8313	NaN	NaN	NaN	NaN	10	1136.61	0.0025572	137.98	AEADKTIKVY	O43660;O43660-2	O43660	PLRG1	Pleiotropic regulator 1
NaN	NaN	24.6168	NaN	NaN	NaN	NaN	NaN	9	1042.5	0.095373	67.897	AEADKVYTF	Q9ULD9;Q9ULD9-2	Q9ULD9	ZNF608	Zinc finger protein 608
NaN	NaN	22.8	22.7869	NaN	NaN	NaN	NaN	9	970.545	0.014469	111.95	AEADLRALL	Q9UBI4;Q9UBI4-6;Q9UBI4-4;Q9UBI4-2;Q9UBI4-5;Q9UBI4-3	Q9UBI4	STOML1	Stomatin-like protein 1
NaN	NaN	22.9108	23.0454	NaN	NaN	NaN	NaN	9	974.482	0.07071	75.109	AEADPLGRF	Q9Y508;Q9Y508-2	Q9Y508	RNF114	E3 ubiquitin-protein ligase RNF114
NaN	NaN	NaN	NaN	NaN	NaN	NaN	NaN	9	1020.52	0.029789	107.57	AEADRTLFV	Q9Y580	Q9Y580	RBM7	RNA-binding protein 7
NaN	NaN	24.65	NaN	NaN	NaN	NaN	NaN	11	1201.63	0.0070448	116.23	AEADSEKARLL	Q5BJF6;Q5BJF6-3;Q5BJF6-9;Q5BJF6-8;Q5BJF6-5;Q5BJF6-6;Q5BJF6-10;Q5BJF6-7;Q5BJF6-2;Q5BJF6-4	Q5BJF6	ODF2	Outer dense fiber protein 2
NaN	NaN	24.3897	22.5569	NaN	NaN	NaN	NaN	10	1140.66	0.035033	80.688	AEADVRRVLL	Q15750;Q15750-2	Q15750	TAB1	TGF-beta-activated kinase 1 and MAP3K7-binding protein 1
NaN	NaN	24.4574	NaN	NaN	NaN	NaN	NaN	10	1033.49	0.0024914	147.51	AEAEAASVRM	O75955;O75955-2	O75955	FLOT1	Flotillin-1
NaN	NaN	NaN	NaN	NaN	NaN	NaN	NaN	10	1017.51	0.0077551	138.98	AEAEASRLTA	O95236;O95236-3;O95236-2	O95236	APOL3	Apolipoprotein L3
NaN	NaN	NaN	NaN	NaN	NaN	NaN	NaN	9	972.488	0.013182	114.5	AEAEAVREV	Q9BZJ0;Q9BZJ0-2;Q9BZJ0-3	Q9BZJ0	CRNKL1	Crooked neck-like protein 1
NaN	NaN	26.2888	24.2464	NaN	NaN	NaN	NaN	10	1135.55	0.0082578	120.99	AEAEAVREVY	Q9BZJ0;Q9BZJ0-2;Q9BZJ0-3	Q9BZJ0	CRNKL1	Crooked neck-like protein 1
NaN	NaN	NaN	NaN	NaN	NaN	NaN	NaN	9	1111.53	0.013587	113.7	AEAEFYRQV	Q6W2J9;Q6W2J9-4;Q6W2J9-2	Q6W2J9	BCOR	BCL-6 corepressor
NaN	NaN	25.1134	21.9662	NaN	NaN	NaN	NaN	9	1024.52	0.026756	98.582	AEAEHKIDL	Q86VU5	Q86VU5	COMTD1	Catechol O-methyltransferase domain-containing protein 1
NaN	NaN	23.7765	NaN	NaN	NaN	NaN	NaN	9	1056.63	0.0088921	150.24	AEAEKIRKI	Q14254	Q14254	FLOT2	Flotillin-2
NaN	NaN	26.0799	24.8549	NaN	NaN	NaN	NaN	9	987.524	0.025241	99.7	AEAEKSQLI	O75955;O75955-2	O75955	FLOT1	Flotillin-1
NaN	NaN	NaN	NaN	NaN	NaN	NaN	NaN	10	1118.56	0.018502	107.21	AEAEKSQLIM	O75955;O75955-2	O75955	FLOT1	Flotillin-1
NaN	NaN	24.5648	22.2501	NaN	NaN	NaN	NaN	9	1044.48	0.086296	82.426	AEAEKTFSY	Q9Y296;Q9Y296-2	Q9Y296	TRAPPC4	Trafficking protein particle complex subunit 4
NaN	NaN	NaN	NaN	NaN	NaN	NaN	NaN	9	942.539	0.047395	85.064	AEAEKVLAL	Q15149;Q15149-4;Q15149-2;Q15149-6;Q15149-9;Q15149-7;Q15149-8;Q15149-5;Q15149-3	Q15149	PLEC	Plectin
NaN	NaN	23.416	NaN	NaN	NaN	NaN	NaN	12	1307.65	0.005097	140.75	AEAELGTFPRAF	Q9NUP1	Q9NUP1	BLOC1S4	Biogenesis of lysosome-related organelles complex 1 subunit 4
NaN	NaN	25.4247	NaN	NaN	NaN	NaN	NaN	10	1194.64	0.031834	83.862	AEAELHKERL	Q9Y2D5-4;Q9Y2D5-6;Q8IXS6;Q8IXS6-2	Q9Y2D5-4	AKAP2;PALM2	A-kinase anchor protein 2;Paralemmin-2
NaN	NaN	29.0974	20.777	NaN	NaN	NaN	NaN	9	1015.42	0.0217	120.52	AEAEPEHSF	Q15149;Q15149-4;Q15149-2;Q15149-6;Q15149-9;Q15149-7;Q15149-8;Q15149-5;Q15149-3	Q15149	PLEC	Plectin
NaN	NaN	24.2247	NaN	NaN	NaN	NaN	NaN	9	983.445	0.033735	97.602	AEAEPEPEL	Q92791;O60936;O60936-3	Q92791	LEPREL4;NOL3	Synaptonemal complex protein SC65;Nucleolar protein 3
NaN	NaN	26.0548	24.7531	NaN	NaN	NaN	NaN	9	1063.53	0.00069949	176.4	AEAEQTLRF	Q03001;Q03001-8	Q03001	DST	Dystonin
19.6813	NaN	NaN	NaN	NaN	NaN	NaN	NaN	13	1492.76	0.093179	65.395	AEAERKVKNSQSF	P54920	P54920	NAPA	Alpha-soluble NSF attachment protein
NaN	NaN	22.0319	NaN	NaN	NaN	NaN	NaN	9	1026.61	0.023072	99.802	AEAERLLLI	Q9NQW6;Q9NQW6-2	Q9NQW6	ANLN	Actin-binding protein anillin
NaN	NaN	26.3357	NaN	NaN	NaN	NaN	NaN	12	1354.74	0.062392	79.283	AEAERVGLHKVF	P11388;P11388-2;P11388-3;P11388-4	P11388	TOP2A	DNA topoisomerase 2-alpha
NaN	NaN	NaN	22.3927	NaN	NaN	NaN	NaN	9	929.471	0.046988	85.265	AEAETLPSL	O95340;O95340-2	O95340	PAPSS2	Bifunctional 3-phosphoadenosine 5-phosphosulfate synthase 2;Sulfate adenylyltransferase;Adenylyl-sulfate kinase
NaN	NaN	NaN	NaN	NaN	NaN	22.1579	NaN	16	1796.97	0.019683	79.652	AEAEVASLNRRIQLVE	P06753-2;P06753-6;P06753-5;P06753-3;P06753-4	P06753-3
NaN	NaN	23.9068	21.8368	NaN	NaN	NaN	NaN	9	1067.54	0.030603	95.741	AEAFARQIY	Q53EQ6;Q53EQ6-2	Q53EQ6	TIGD5	Tigger transposable element-derived protein 5
NaN	NaN	26.1788	23.2385	NaN	NaN	NaN	NaN	11	1186.63	0.027103	101.64	AEAFEAIPRAL	P50990;P50990-2;P50990-3	P50990	CCT8	T-complex protein 1 subunit theta
NaN	NaN	NaN	NaN	NaN	NaN	19.9342	NaN	13	1386.71	0.15753	74.944	AEAFEAIPRALAE	P50990;P50990-2;P50990-3	P50990	CCT8	T-complex protein 1 subunit theta
NaN	NaN	NaN	NaN	NaN	NaN	NaN	NaN	14	1500.76	4.23e-52	240.8	AEAFEAIPRALAEN	P50990;P50990-2;P50990-3	P50990	CCT8	T-complex protein 1 subunit theta
NaN	NaN	NaN	NaN	NaN	NaN	NaN	NaN	15	1587.79	0.0010084	151.55	AEAFEAIPRALAENS	P50990;P50990-2;P50990-3	P50990	CCT8	T-complex protein 1 subunit theta
NaN	NaN	NaN	NaN	NaN	NaN	NaN	NaN	16	1644.81	9.24e-33	227.56	AEAFEAIPRALAENSG	P50990;P50990-2;P50990-3	P50990	CCT8	T-complex protein 1 subunit theta
21.3825	NaN	NaN	NaN	NaN	NaN	NaN	NaN	8	909.471	0.074159	100.07	AEAFVRAF	O95707	O95707	POP4	Ribonuclease P protein subunit p29
NaN	NaN	23.8922	NaN	NaN	NaN	NaN	NaN	13	1112.52	0.05223	79.986	AEAGAARGGAEPG	O15534	O15534	PER1	Period circadian protein homolog 1
NaN	NaN	22.8469	NaN	NaN	NaN	NaN	NaN	9	813.387	0.021386	103.91	AEAGPAGEL	Q6ZRV2	Q6ZRV2	FAM83H	Protein FAM83H
NaN	NaN	NaN	NaN	NaN	NaN	NaN	NaN	9	813.423	0.057434	80.098	AEAGPLASV	Q96H79	Q96H79	ZC3HAV1L	Zinc finger CCCH-type antiviral protein 1-like
NaN	NaN	NaN	NaN	NaN	NaN	NaN	NaN	9	1047.55	0.047096	75.378	AEAGRFREL	Q15149;Q15149-4;Q15149-2;Q15149-6;Q15149-9;Q15149-7;Q15149-8;Q15149-5;Q15149-3	Q15149	PLEC	Plectin
NaN	NaN	NaN	NaN	NaN	NaN	NaN	NaN	9	843.434	0.049053	84.244	AEAGVAVEV	Q53GL7	Q53GL7	PARP10	Poly [ADP-ribose] polymerase 10
NaN	NaN	26.9935	24.6467	NaN	NaN	NaN	NaN	9	889.418	0.011839	117.16	AEAGVPAEF	P21333;P21333-2	P21333	FLNA	Filamin-A
NaN	NaN	24.3003	NaN	NaN	NaN	NaN	NaN	9	1016.55	0.10872	56.729	AEAHARIHL	P49736	P49736	MCM2	DNA replication licensing factor MCM2
NaN	NaN	NaN	NaN	NaN	NaN	NaN	NaN	9	1064.57	0.0084503	133.68	AEAHRIQQI	Q14254	Q14254	FLOT2	Flotillin-2
NaN	NaN	NaN	NaN	NaN	NaN	NaN	NaN	9	950.482	0.0087808	129.72	AEAIHSPQV	P12270	P12270	TPR	Nucleoprotein TPR
NaN	NaN	NaN	NaN	NaN	NaN	NaN	NaN	9	962.519	0.055012	81.297	AEAIHVNPL	Q9BZW2	Q9BZW2	SLC13A1	Solute carrier family 13 member 1
21.0118	NaN	NaN	NaN	NaN	NaN	NaN	NaN	8	822.46	0.15683	74.832	AEAIIHGL	P54274;P54274-2	P54274	TERF1	Telomeric repeat-binding factor 1
NaN	NaN	25.97	NaN	NaN	NaN	NaN	NaN	9	923.496	0.039233	89.369	AEAIPEPVV	Q9NQC1;Q9NQC1-3;Q9NQC1-2	Q9NQC1	JADE2	Protein Jade-2
NaN	NaN	NaN	NaN	NaN	NaN	NaN	NaN	9	957.549	0.014469	111.95	AEAIQTVKV	O95625	O95625	ZBTB11	Zinc finger and BTB domain-containing protein 11
24.5582	23.0593	25.3179	23.9868	NaN	NaN	NaN	NaN	9	1003.58	0.0080255	136.8	AEAIRKIGF	Q6QHF9-4;Q6QHF9-2;Q6QHF9	Q6QHF9-4	PAOX	Peroxisomal N(1)-acetyl-spermine/spermidine oxidase
NaN	NaN	NaN	NaN	NaN	NaN	NaN	NaN	9	869.424	0.052972	82.305	AEAISGHSV	Q8NFC6	Q8NFC6	BOD1L1	Biorientation of chromosomes in cell division protein 1-like 1
NaN	NaN	28.4617	25.471	NaN	NaN	NaN	NaN	11	1263.68	0.0013442	146.88	AEAITLAERKY	Q8TBA6;Q8TBA6-2	Q8TBA6	GOLGA5	Golgin subfamily A member 5
NaN	NaN	23.4415	NaN	NaN	NaN	NaN	NaN	9	957.524	0.011399	134.05	AEAKARAEI	Q9UNF1;Q9UNF1-2	Q9UNF1	MAGED2	Melanoma-associated antigen D2
NaN	NaN	NaN	NaN	NaN	NaN	21.791	NaN	17	2037.06	9.73e-20	185.33	AEAKFFTESRLLQRDVQ	Q7KZF4	Q7KZF4	SND1	Staphylococcal nuclease domain-containing protein 1
NaN	NaN	24.1752	NaN	NaN	NaN	NaN	NaN	10	1154.71	0.0068154	112.71	AEAKQIVRKL	Q8NI27	Q8NI27	THOC2	THO complex subunit 2
NaN	NaN	NaN	NaN	NaN	NaN	NaN	NaN	24	2695.44	3.8e-62	223.69	AEAKSYFEKSKEQLTPLIKKAGTE	P02652	P02652	APOA2	Apolipoprotein A-II;Proapolipoprotein A-II;Truncated apolipoprotein A-II
NaN	NaN	NaN	NaN	NaN	NaN	NaN	NaN	25	2808.53	3.98e-111	237.32	AEAKSYFEKSKEQLTPLIKKAGTEL	P02652	P02652	APOA2	Apolipoprotein A-II;Proapolipoprotein A-II;Truncated apolipoprotein A-II
NaN	NaN	23.8392	NaN	NaN	NaN	NaN	NaN	9	972.503	0.068162	75.854	AEALAAHKY	P07237	P07237	P4HB	Protein disulfide-isomerase
NaN	NaN	22.7026	23.1413	NaN	NaN	NaN	NaN	9	937.523	0.085062	70.912	AEALATHIL	Q9UKA4	Q9UKA4	AKAP11	A-kinase anchor protein 11
NaN	NaN	24.4373	22.7049	NaN	NaN	NaN	NaN	9	1059.49	0.036968	91.041	AEALELHDY	Q15059;Q15059-2	Q15059	BRD3	Bromodomain-containing protein 3
NaN	NaN	23.9903	24.2086	NaN	NaN	NaN	NaN	10	1031.53	0.043239	90.657	AEALGPLQSF	P50225;P50226;P0DMM9;P0DMN0;P0DMM9-3;P0DMM9-2	P50225	SULT1A1;SULT1A2;SULT1A3;SULT1A4	Sulfotransferase 1A1;Sulfotransferase 1A2;Sulfotransferase 1A3;Sulfotransferase 1A4
NaN	NaN	25.7519	NaN	NaN	NaN	NaN	NaN	9	967.451	0.0085513	132.72	AEALHAHGY	A7E2V4;A7E2V4-5;A7E2V4-3;A7E2V4-4;A7E2V4-2	A7E2V4	ZSWIM8	Zinc finger SWIM domain-containing protein 8
NaN	NaN	27.8582	24.9974	NaN	NaN	NaN	NaN	9	941.518	0.0017772	171.53	AEALPKQSV	P20290;P20290-2	P20290	BTF3	Transcription factor BTF3
NaN	NaN	NaN	NaN	NaN	NaN	NaN	NaN	9	938.544	0.018269	107.32	AEALQLPVV	Q12888;Q12888-3;Q12888-2	Q12888	TP53BP1	Tumor suppressor p53-binding protein 1
22.9723	NaN	NaN	NaN	NaN	NaN	NaN	NaN	9	916.498	0.024164	103.55	AEALRTSGL	Q86Y91;Q86Y91-2;Q86Y91-3;Q86Y91-4	Q86Y91	KIF18B	Kinesin-like protein KIF18B
NaN	NaN	NaN	NaN	NaN	NaN	NaN	NaN	9	997.628	0.026002	99.139	AEALRVVKI	P78332;P78332-2	P78332	RBM6	RNA-binding protein 6
NaN	NaN	24.9007	NaN	NaN	NaN	NaN	NaN	9	989.558	0.083465	71.379	AEALSKMKL	P33992	P33992	MCM5	DNA replication licensing factor MCM5
17.7437	27.7934	NaN	NaN	NaN	NaN	NaN	NaN	8	863.439	0.080095	93.561	AEALVQSF	Q05086;Q05086-2;Q05086-3	Q05086	UBE3A	Ubiquitin-protein ligase E3A
NaN	NaN	25.6372	24.8191	NaN	NaN	NaN	NaN	9	886.512	0.1285	61.962	AEALVSKGL	Q7KZF4	Q7KZF4	SND1	Staphylococcal nuclease domain-containing protein 1
NaN	NaN	24.5451	NaN	NaN	NaN	NaN	NaN	9	954.448	0.12451	62.582	AEAMKTSAF	Q8N3C0;Q8N3C0-4	Q8N3C0	ASCC3	Activating signal cointegrator 1 complex subunit 3
NaN	NaN	NaN	24.0188	NaN	NaN	NaN	NaN	9	887.442	0.022476	102.71	AEAMLGPSL	P07333	P07333	CSF1R	Macrophage colony-stimulating factor 1 receptor
NaN	NaN	23.8527	22.8085	NaN	NaN	NaN	NaN	9	1028.49	0.061288	78.192	AEANHFIDL	O15294;O15294-2;O15294-3;O15294-4	O15294	OGT	UDP-N-acetylglucosamine--peptide N-acetylglucosaminyltransferase 110 kDa subunit
NaN	NaN	23.5937	NaN	NaN	NaN	NaN	NaN	10	1114.55	0.043333	90.601	AEANRALAHY	Q9Y2R9	Q9Y2R9	MRPS7	28S ribosomal protein S7, mitochondrial
NaN	NaN	NaN	NaN	NaN	NaN	NaN	NaN	10	1072.58	0.021631	122.96	AEANSLKLEV	Q9BZZ2;Q9BZZ2-3;Q9BZZ2-2	Q9BZZ2	SIGLEC1	Sialoadhesin
NaN	NaN	NaN	23.2528	NaN	NaN	NaN	NaN	9	1002.48	0.12527	62.464	AEANVMQQL	P43405;P43405-2	P43405	SYK	Tyrosine-protein kinase SYK
NaN	NaN	25.1133	25.416	NaN	NaN	NaN	NaN	9	795.413	0.0088208	129.2	AEAPAGPAL	Q53F19	Q53F19	C17orf85	Uncharacterized protein C17orf85
NaN	NaN	NaN	NaN	NaN	NaN	NaN	NaN	9	953.566	0.043897	86.794	AEAPKARLV	Q9H6B4	Q9H6B4	CLMP	CXADR-like membrane protein
NaN	NaN	23.6899	NaN	NaN	NaN	NaN	NaN	9	1003.51	0.036968	91.041	AEAPLRGQY	Q8NBR6;Q8NBR6-2	Q8NBR6	FAM63B	Protein FAM63B
NaN	NaN	22.9788	NaN	NaN	NaN	NaN	NaN	10	1155.6	0.057703	72.643	AEAPPPQKRY	Q9UBP6;Q9UBP6-2	Q9UBP6	METTL1	tRNA (guanine-N(7)-)-methyltransferase
NaN	NaN	NaN	NaN	NaN	NaN	NaN	NaN	9	865.455	0.018269	107.32	AEAPPPSVV	Q92841	Q92841	DDX17	Probable ATP-dependent RNA helicase DDX17
NaN	NaN	25.1467	24.9428	NaN	NaN	NaN	NaN	9	1018.51	0.0053282	119.21	AEAPRLAEY	Q15020;Q15020-4;Q15020-2	Q15020	SART3	Squamous cell carcinoma antigen recognized by T-cells 3
NaN	NaN	NaN	NaN	NaN	NaN	NaN	NaN	10	1028.55	0.043063	90.761	AEAPSQKVTV	P18887	P18887	XRCC1	DNA repair protein XRCC1
NaN	NaN	26.5497	24.337	NaN	NaN	NaN	NaN	9	969.524	0.037565	110.14	AEAPSQVRL	Q9P2E5;Q9P2E5-2	Q9P2E5	CHPF2	Chondroitin sulfate glucuronyltransferase
NaN	NaN	NaN	NaN	NaN	NaN	NaN	NaN	9	871.392	0.038988	89.55	AEAPSSPDV	Q9P1Y6;Q9P1Y6-2;Q9P1Y6-3	Q9P1Y6	PHRF1	PHD and RING finger domain-containing protein 1
NaN	NaN	23.1442	NaN	NaN	NaN	NaN	NaN	13	1401.67	0.092036	56.225	AEAPSSVRDDLKD	Q9BUG6;Q9BUG6-2	Q9BUG6	ZSCAN5A	Zinc finger and SCAN domain-containing protein 5A
NaN	NaN	23.9824	22.0178	NaN	NaN	NaN	NaN	9	987.455	0.009243	123.69	AEAPVPEEF	Q6ICB4	Q6ICB4	FAM109B	Sesquipedalian-2
NaN	NaN	NaN	NaN	NaN	NaN	NaN	NaN	9	931.497	0.042073	87.696	AEAQKSSLV	Q9HD33;Q9HD33-3;Q9HD33-2	Q9HD33	MRPL47	39S ribosomal protein L47, mitochondrial
NaN	NaN	23.2332	NaN	NaN	NaN	NaN	NaN	10	1126.63	0.079449	78.113	AEAQLLNKQI	P23921	P23921	RRM1	Ribonucleoside-diphosphate reductase large subunit
NaN	NaN	23.5986	NaN	NaN	NaN	NaN	NaN	10	1112.53	0.079202	78.192	AEAQPVHQAY	Q9UQR1;Q9UQR1-2	Q9UQR1	ZNF148	Zinc finger protein 148
NaN	NaN	27.0014	25.0453	NaN	NaN	NaN	NaN	9	985.544	0.014536	111.82	AEAQQLITI	P53621;P53621-2	P53621	COPA	Coatomer subunit alpha;Xenin;Proxenin
NaN	NaN	NaN	NaN	NaN	NaN	NaN	NaN	9	955.545	0.033809	93.374	AEAQRALVV	Q8N2R8	Q8N2R8	FAM43A	Protein FAM43A
25.2492	NaN	NaN	NaN	NaN	NaN	NaN	NaN	9	1078.53	0.014879	121.62	AEAQRFARM	Q9H0S4;Q9H0S4-2	Q9H0S4	DDX47	Probable ATP-dependent RNA helicase DDX47
NaN	NaN	NaN	22.6853	NaN	NaN	NaN	NaN	9	941.529	0.16163	56.81	AEAQRLAAI	Q96PP8	Q96PP8	GBP5	Guanylate-binding protein 5
NaN	NaN	24.3636	NaN	NaN	NaN	NaN	NaN	8	939.525	0.11586	94.163	AEAQRPLR	P49748-3	P49748-3	ACADVL	Very long-chain specific acyl-CoA dehydrogenase, mitochondrial
NaN	NaN	NaN	NaN	NaN	NaN	20.593	NaN	15	1671.93	0.022392	78.932	AEAREKETKALSLAR	P35579;P35579-2;P35580;P35580-2;P35580-5;P35580-3;P35580-4;P35749;P35749-4;P35749-3;P35749-2	P35579	MYH9;MYH10;MYH11	Myosin-9;Myosin-10;Myosin-11
NaN	NaN	NaN	NaN	NaN	NaN	NaN	NaN	9	993.499	0.011536	117.76	AEARHNPSI	Q9NV58;Q9NV58-3;Q9NV58-2	Q9NV58	RNF19A	E3 ubiquitin-protein ligase RNF19A
NaN	NaN	24.6072	NaN	NaN	NaN	NaN	NaN	10	1140.47	0.10341	72.928	AEARNMGMDF	O00469;O00469-2	O00469	PLOD2	Procollagen-lysine,2-oxoglutarate 5-dioxygenase 2
22.8077	NaN	NaN	NaN	NaN	NaN	NaN	NaN	9	1063.56	0.10019	68.214	AEARRMAFL	Q9H1I8;Q9H1I8-3	Q9H1I8	ASCC2	Activating signal cointegrator 1 complex subunit 2
NaN	NaN	24.8235	21.609	NaN	NaN	NaN	NaN	11	1235.58	0.002041	135.79	AEASALQQQQY	Q96PV6;Q96PV6-2	Q96PV6	LENG8	Leukocyte receptor cluster member 8
NaN	NaN	25.798	NaN	NaN	NaN	NaN	NaN	13	1198.55	0.066985	73.233	AEASGKPSPSDPG	Q5JRA6;Q5JRA6-2;Q5JRA6-4	Q5JRA6	MIA3	Melanoma inhibitory activity protein 3
NaN	NaN	26.7599	NaN	NaN	NaN	NaN	NaN	9	1018.48	0.0093581	122.19	AEASHVSRY	Q86XL3;Q86XL3-2	Q86XL3	ANKLE2	Ankyrin repeat and LEM domain-containing protein 2
NaN	NaN	26.6315	27.2335	NaN	NaN	NaN	NaN	9	948.495	0.060632	78.516	AEASMISKL	Q13616	Q13616	CUL1	Cullin-1
NaN	NaN	NaN	NaN	NaN	NaN	NaN	NaN	10	1038.55	0.018618	128.57	AEASQLGHKV	Q9Y490	Q9Y490	TLN1	Talin-1
NaN	NaN	NaN	25.5503	NaN	NaN	NaN	NaN	9	948.459	0.058707	79.469	AEASVMTQL	P41240	P41240	CSK	Tyrosine-protein kinase CSK
NaN	NaN	25.0541	NaN	NaN	NaN	NaN	NaN	10	1090.58	0.0040079	135.71	AEATARLNVF	P50895	P50895	BCAM	Basal cell adhesion molecule
NaN	NaN	NaN	NaN	NaN	NaN	NaN	NaN	9	913.512	0.07779	73.039	AEATLPTVI	Q8TEQ8;Q8TEQ8-2	Q8TEQ8	PIGO	GPI ethanolamine phosphate transferase 3
NaN	NaN	NaN	26.272	NaN	NaN	NaN	NaN	9	1071.61	0.023455	87.639	AEATRKQRI	O43914-2	O43914-2	TYROBP	TYRO protein tyrosine kinase-binding protein
22.0812	23.9277	NaN	NaN	NaN	NaN	NaN	NaN	9	976.534	0.0042356	134.48	AEATRVAFL	Q8N4P2	Q8N4P2	TTC30B	Tetratricopeptide repeat protein 30B
NaN	NaN	NaN	NaN	NaN	NaN	24.252	NaN	8	802.371	0.059281	103.29	AEATVPSE	P07204	P07204	THBD	Thrombomodulin
NaN	NaN	NaN	NaN	NaN	NaN	NaN	NaN	10	1089.62	0.023393	116.3	AEAVFRAITI	Q14195;Q14195-2;Q14194;Q14194-2	Q14195	DPYSL3;CRMP1	Dihydropyrimidinase-related protein 3;Dihydropyrimidinase-related protein 1
NaN	NaN	25.0536	NaN	NaN	NaN	NaN	NaN	9	1035.62	0.022471	90.657	AEAVLRHKL	O95479	O95479	H6PD	GDH/6PGL endoplasmic bifunctional protein;Glucose 1-dehydrogenase;6-phosphogluconolactonase
NaN	NaN	NaN	NaN	NaN	NaN	NaN	NaN	10	1056.59	0.0066709	125.48	AEAVNRAITI	Q16555;Q16555-2	Q16555	DPYSL2	Dihydropyrimidinase-related protein 2
NaN	NaN	24.008	21.7837	NaN	NaN	NaN	NaN	9	956.493	0.026923	98.458	AEAVQAQQL	Q13751	Q13751	LAMB3	Laminin subunit beta-3
NaN	NaN	23.8263	23.3257	NaN	NaN	NaN	NaN	9	1061.59	0.0062474	114.28	AEAVQRLLY	Q5T447	Q5T447	HECTD3	E3 ubiquitin-protein ligase HECTD3
NaN	NaN	21.7054	22.9551	NaN	NaN	NaN	NaN	9	1006.57	0.06979	85.064	AEAVTLIKY	Q49AG3	Q49AG3	ZBED5	Zinc finger BED domain-containing protein 5
NaN	NaN	NaN	NaN	NaN	NaN	NaN	NaN	9	950.507	0.058328	106.6	AEAYLGKTV	P11142;P11142-2	P11142	HSPA8	Heat shock cognate 71 kDa protein
NaN	NaN	24.4304	NaN	NaN	NaN	NaN	NaN	9	1130.51	0.024941	100.02	AEDAMRLYY	P36954	P36954	POLR2I	DNA-directed RNA polymerase II subunit RPB9
NaN	NaN	25.991	27.0942	NaN	NaN	NaN	NaN	9	1063.56	0.027478	109.71	AEDDFKKVL	Q13217	Q13217	DNAJC3	DnaJ homolog subfamily C member 3
NaN	NaN	NaN	NaN	NaN	NaN	NaN	NaN	11	1335.63	0.0017823	159.37	AEDDNIYQQKI	Q96FW1	Q96FW1	OTUB1	Ubiquitin thioesterase OTUB1
NaN	NaN	NaN	24.1896	NaN	NaN	NaN	NaN	10	1229.57	0.035034	88.495	AEDEDLRVHF	P12956;P12956-2	P12956	XRCC6	X-ray repair cross-complementing protein 6
NaN	NaN	28.3986	NaN	NaN	NaN	NaN	NaN	11	1264.6	1.5e-09	206.43	AEDEGVSQRKF	O00299	O00299	CLIC1	Chloride intracellular channel protein 1
NaN	NaN	NaN	24.077	NaN	NaN	NaN	NaN	9	1155.52	0.00034605	178.6	AEDELFNRY	P57740;P57740-2;P57740-3	P57740	NUP107	Nuclear pore complex protein Nup107
NaN	NaN	28.1565	24.3779	NaN	NaN	NaN	NaN	11	1193.56	2.9e-09	192.91	AEDENGKIVGY	P41227;P41227-2	P41227	NAA10	N-alpha-acetyltransferase 10
NaN	NaN	NaN	NaN	NaN	NaN	NaN	NaN	10	1229.6	0.046116	77.379	AEDEVQRERV	P0DMV8;P0DMV9;P0DMV8-2	P0DMV8	HSPA1A;HSPA1B	Heat shock 70 kDa protein 1A;Heat shock 70 kDa protein 1B
NaN	NaN	NaN	NaN	NaN	NaN	NaN	NaN	8	921.481	0.057363	104.45	AEDFTVKI	P08069	P08069	IGF1R	Insulin-like growth factor 1 receptor;Insulin-like growth factor 1 receptor alpha chain;Insulin-like growth factor 1 receptor beta chain
23.0242	NaN	NaN	NaN	NaN	NaN	NaN	NaN	17	1580.73	0.00026796	103.76	AEDGGTGGGSTYVSKPV	P23588;P23588-2	P23588	EIF4B	Eukaryotic translation initiation factor 4B
NaN	NaN	NaN	NaN	26.6239	21.8766	NaN	NaN	24	2549.23	2.89e-10	133.38	AEDGHGPGEQQKRKIVLDPSGSMN	P00751;P00751-2	P00751	CFB	Complement factor B;Complement factor B Ba fragment;Complement factor B Bb fragment
NaN	NaN	23.0525	22.519	NaN	NaN	NaN	NaN	9	1033.56	0.058707	67.897	AEDGKVRIF	Q7Z5U6	Q7Z5U6	WDR53	WD repeat-containing protein 53
NaN	NaN	25.0817	23.7101	NaN	NaN	NaN	NaN	9	1063.53	0.03967	89.046	AEDGLIRQY	Q8N5D0;Q8N5D0-4;Q8N5D0-5;Q8N5D0-3;Q8N5D0-6;Q8N5D0-2	Q8N5D0	WDTC1	WD and tetratricopeptide repeats protein 1
NaN	NaN	27.708	NaN	NaN	NaN	NaN	NaN	9	1060.48	0.010346	120.12	AEDGLKHEY	P21127;Q9UQ88;P21127-9;Q9UQ88-10;P21127-12;Q9UQ88-2;P21127-2;Q9UQ88-5;P21127-4;P21127-5;P21127-10;P21127-6;Q9UQ88-4;P21127-8;Q9UQ88-3;P21127-3;Q9UQ88-8	P21127	CDK11B;CDK11A	Cyclin-dependent kinase 11B;Cyclin-dependent kinase 11A
NaN	NaN	NaN	23.2679	NaN	NaN	NaN	NaN	9	988.498	0.083049	71.501	AEDGPRVVF	Q6ICH7	Q6ICH7	ASPHD2	Aspartate beta-hydroxylase domain-containing protein 2
NaN	NaN	NaN	NaN	NaN	NaN	NaN	NaN	9	1087.5	0.013031	100.25	AEDHFRNSI	Q5VV42;Q5VV42-2	Q5VV42	CDKAL1	Threonylcarbamoyladenosine tRNA methylthiotransferase
NaN	NaN	NaN	NaN	NaN	NaN	NaN	NaN	9	1024.52	0.02991	96.253	AEDHQTLLV	Q96Q05;Q96Q05-3;Q96Q05-2	Q96Q05	TRAPPC9	Trafficking protein particle complex subunit 9
NaN	NaN	27.1791	24.4459	NaN	NaN	NaN	NaN	10	1161.68	0.023113	93.467	AEDIAKIKKF	P25205;P25205-2	P25205	MCM3	DNA replication licensing factor MCM3
21.5217	NaN	NaN	NaN	NaN	NaN	NaN	NaN	12	1305.63	0.0045644	98.156	AEDKAAAERSKM	P04899;P04899-4	P04899	GNAI2	Guanine nucleotide-binding protein G(i) subunit alpha-2
NaN	NaN	NaN	NaN	NaN	NaN	NaN	NaN	10	1107.63	0.0065285	143.45	AEDKAIVIHI	P17181;P17181-2;P17181-4;P17181-3	P17181	IFNAR1	Interferon alpha/beta receptor 1
NaN	NaN	NaN	NaN	NaN	NaN	NaN	NaN	9	958.461	0.026194	98.997	AEDKDTPAL	Q7Z6Z7;Q7Z6Z7-2;Q7Z6Z7-3	Q7Z6Z7	HUWE1	E3 ubiquitin-protein ligase HUWE1
NaN	NaN	31.9302	21.7705	NaN	NaN	NaN	NaN	10	1270.62	3.96e-20	222.07	AEDKENYKKF	P07900;P07900-2;P08238	P07900	HSP90AA1;HSP90AB1	Heat shock protein HSP 90-alpha;Heat shock protein HSP 90-beta
NaN	NaN	29.5959	23.7293	NaN	NaN	NaN	NaN	11	1433.68	9.93e-65	258.33	AEDKENYKKFY	P07900;P07900-2;P08238	P07900	HSP90AA1;HSP90AB1	Heat shock protein HSP 90-alpha;Heat shock protein HSP 90-beta
NaN	NaN	24.8728	NaN	NaN	NaN	NaN	NaN	9	1009.56	0.0023123	155.88	AEDKKGHLI	Q13510;Q13510-2;Q13510-3	Q13510	ASAH1	Acid ceramidase;Acid ceramidase subunit alpha;Acid ceramidase subunit beta
NaN	NaN	NaN	NaN	NaN	NaN	NaN	NaN	9	1016.59	0.018907	118.71	AEDKKLKSV	Q9P0M6	Q9P0M6	H2AFY2	Core histone macro-H2A.2
NaN	NaN	NaN	NaN	NaN	NaN	NaN	NaN	9	1026.55	0.026691	98.629	AEDKPRAQL	P55199	P55199	ELL	RNA polymerase II elongation factor ELL
NaN	NaN	NaN	NaN	NaN	NaN	NaN	NaN	10	1186.67	0.061195	72.2	AEDKRTQKLV	Q14012	Q14012	CAMK1	Calcium/calmodulin-dependent protein kinase type 1
NaN	NaN	NaN	NaN	NaN	NaN	NaN	NaN	9	1063.52	0.021539	103.74	AEDKVFNEI	Q9H267;Q9H267-2	Q9H267	VPS33B	Vacuolar protein sorting-associated protein 33B
NaN	NaN	24.5529	23.1432	NaN	NaN	NaN	NaN	10	1152.54	0.0046999	153.24	AEDLNSRVSY	Q9Y3Q3	Q9Y3Q3	TMED3	Transmembrane emp24 domain-containing protein 3
NaN	NaN	25.5362	25.6558	NaN	NaN	NaN	NaN	10	1150.56	4.87e-08	189.7	AEDLNTRVAY	Q86XR7-2;Q9Y3B3;Q9Y3B3-2	Q86XR7-2	TMED7	Transmembrane emp24 domain-containing protein 7
NaN	NaN	23.549	NaN	NaN	NaN	NaN	NaN	10	1187.59	0.055807	82.261	AEDLRAKAEW	Q9H7D7;Q9H7D7-2	Q9H7D7	WDR26	WD repeat-containing protein 26
NaN	NaN	22.8993	NaN	NaN	NaN	NaN	NaN	10	1093.57	0.12882	67.704	AEDLVGKSLY	P01024	P01024	C3	Complement C3;Complement C3 beta chain;C3-beta-c;Complement C3 alpha chain;C3a anaphylatoxin;Acylation stimulating protein;Complement C3b alpha chain;Complement C3c alpha chain fragment 1;Complement C3dg fragment;Complement C3g fragment;Complement C3d fragment;Complement C3f fragment;Complement C3c alpha chain fragment 2
NaN	NaN	27.8995	NaN	NaN	NaN	NaN	NaN	11	1340.63	1.25e-39	235.01	AEDMETKIKNY	P14854	P14854	COX6B1	Cytochrome c oxidase subunit 6B1
NaN	NaN	NaN	NaN	NaN	NaN	NaN	NaN	19	2073.99	0.00057885	94.973	AEDNADTLALVFEAPNQEK	P12004	P12004	PCNA	Proliferating cell nuclear antigen
NaN	NaN	23.0874	23.7708	NaN	NaN	NaN	NaN	9	1085.55	0.12474	55.461	AEDNLIHKF	Q9NX02;Q9NX02-3;Q9NX02-4;Q9NX02-5;Q9NX02-2	Q9NX02	NLRP2	NACHT, LRR and PYD domains-containing protein 2
NaN	NaN	23.2772	NaN	NaN	NaN	NaN	NaN	11	1269.55	0.077535	80.782	AEDNRSHSAHF	P30046;A6NHG4;P30046-2	P30046	DDT;DDTL	D-dopachrome decarboxylase;D-dopachrome decarboxylase-like protein
NaN	NaN	NaN	NaN	NaN	NaN	NaN	NaN	9	898.476	0.031777	94.874	AEDPAGLKV	Q9UNY4;Q9UNY4-2	Q9UNY4	TTF2	Transcription termination factor 2
NaN	NaN	NaN	NaN	NaN	NaN	NaN	NaN	11	1212.62	0.0067747	116.73	AEDPETQVVLI	Q9Y490	Q9Y490	TLN1	Talin-1
NaN	NaN	NaN	NaN	NaN	NaN	NaN	NaN	25	2809.5	0.19247	33.909	AEDPFPEEVFPAVQGKTKRPVDLKI	Q8N103;Q8N103-3;Q8N103-2	Q8N103	TAGAP	T-cell activation Rho GTPase-activating protein
NaN	NaN	NaN	NaN	NaN	NaN	NaN	NaN	10	1085.6	0.039108	107.66	AEDPKVTLTI	Q9HC16	Q9HC16	APOBEC3G	DNA dC->dU-editing enzyme APOBEC-3G
NaN	NaN	NaN	22.6951	NaN	NaN	NaN	NaN	10	1034.54	0.068703	86.086	AEDPLGAIHL	P08567	P08567	PLEK	Pleckstrin
NaN	NaN	26.6056	NaN	NaN	NaN	NaN	NaN	10	1184.55	0.0062221	127.02	AEDPQERPPF	P16066	P16066	NPR1	Atrial natriuretic peptide receptor 1
NaN	NaN	25.4285	NaN	NaN	NaN	NaN	NaN	9	1082.48	0.008954	127.46	AEDQLHHSF	Q4G148;Q4G148-2	Q4G148	GXYLT1	Glucoside xylosyltransferase 1
NaN	NaN	24.5851	21.1226	NaN	NaN	NaN	NaN	10	1206.62	0.14721	55.567	AEDRELLKAY	Q9H6S0	Q9H6S0	YTHDC2	Probable ATP-dependent RNA helicase YTHDC2
NaN	NaN	NaN	NaN	NaN	NaN	NaN	NaN	9	944.456	0.013292	114.28	AEDRGTPSL	Q9HCL0;Q9HCL0-2	Q9HCL0	PCDH18	Protocadherin-18
NaN	NaN	NaN	NaN	NaN	NaN	NaN	NaN	9	1043.49	0.016907	108.81	AEDRPSEQL	Q8WUI4;Q8WUI4-7;Q8WUI4-5;Q8WUI4-3;Q8WUI4-4;Q8WUI4-6;Q8WUI4-9;Q8WUI4-2;Q8WUI4-10	Q8WUI4	HDAC7	Histone deacetylase 7
NaN	NaN	24.6835	25.1208	NaN	NaN	NaN	NaN	9	953.482	0.070356	79.939	AEDSGLHII	Q63HN8-4;Q63HN8	Q63HN8-4	RNF213	E3 ubiquitin-protein ligase RNF213
NaN	NaN	23.6033	NaN	NaN	NaN	NaN	NaN	10	1178.54	0.043239	78.655	AEDSNTHRHL	P14868;P14868-2	P14868	DARS	Aspartate--tRNA ligase, cytoplasmic
NaN	NaN	23.5389	NaN	NaN	NaN	NaN	NaN	9	986.474	0.068559	75.738	AEDSPKMPL	Q63HN8-4;Q63HN8	Q63HN8-4	RNF213	E3 ubiquitin-protein ligase RNF213
NaN	NaN	29.0289	21.2826	NaN	NaN	NaN	NaN	10	1186.47	0.0064385	126.28	AEDSVMDHHF	Q8NC51;Q8NC51-3;Q8NC51-2;Q8NC51-4	Q8NC51	SERBP1	Plasminogen activator inhibitor 1 RNA-binding protein
NaN	NaN	23.6662	NaN	NaN	NaN	NaN	NaN	11	1303.59	0.0039754	121.83	AEDTSDHRRAF	Q6AI08	Q6AI08	HEATR6	HEAT repeat-containing protein 6
NaN	NaN	23.348	NaN	NaN	NaN	NaN	NaN	11	1251.68	0.076794	80.979	AEDVKAKLHEL	Q13813;Q13813-3;Q13813-2	Q13813	SPTAN1	Spectrin alpha chain, non-erythrocytic 1
NaN	NaN	22.6319	23.2121	NaN	NaN	NaN	NaN	9	1077.57	0.019911	119.29	AEDVKLQLY	P19838;P19838-2;P19838-3	P19838	NFKB1	Nuclear factor NF-kappa-B p105 subunit;Nuclear factor NF-kappa-B p50 subunit
NaN	NaN	NaN	NaN	NaN	NaN	NaN	NaN	9	1023.53	0.080283	66.429	AEDVPPQRL	Q03169	Q03169	TNFAIP2	Tumor necrosis factor alpha-induced protein 2
NaN	NaN	26.622	NaN	NaN	NaN	NaN	NaN	9	1143.52	0.0078481	138.1	AEDYAKERY	P14868	P14868	DARS	Aspartate--tRNA ligase, cytoplasmic
NaN	NaN	NaN	NaN	NaN	NaN	NaN	NaN	9	994.497	0.065342	76.679	AEDYGVIKT	Q01995	Q01995	TAGLN	Transgelin
NaN	NaN	NaN	NaN	NaN	NaN	NaN	NaN	9	944.493	0.036931	91.069	AEEAARLSV	Q15149;Q15149-4;Q15149-2;Q15149-6;Q15149-9;Q15149-7;Q15149-8;Q15149-5;Q15149-3	Q15149	PLEC	Plectin
NaN	NaN	21.5737	NaN	NaN	NaN	NaN	NaN	10	1139.59	0.097581	74.127	AEEALKYIGF	Q9NWB7	Q9NWB7	IFT57	Intraflagellar transport protein 57 homolog
NaN	NaN	NaN	NaN	NaN	NaN	NaN	NaN	10	1175.6	0.066473	85.67	AEEARAFNRI	Q9UHX1;Q9UHX1-6;Q9UHX1-5;Q9UHX1-4;Q9UHX1-3;Q9UHX1-2	Q9UHX1	PUF60	Poly(U)-binding-splicing factor PUF60
NaN	NaN	NaN	NaN	NaN	NaN	NaN	NaN	9	1036.57	0.039668	78.516	AEEARLLHV	O95391	O95391	SLU7	Pre-mRNA-splicing factor SLU7
NaN	NaN	23.5898	NaN	NaN	NaN	NaN	NaN	9	901.476	0.10465	65.672	AEEATIGIV	P20585	P20585	MSH3	DNA mismatch repair protein Msh3
NaN	NaN	23.2528	21.2428	NaN	NaN	NaN	NaN	11	1242.62	0.0020273	155.07	AEEDLAQQRAL	Q15149;Q15149-4;Q15149-2;Q15149-6;Q15149-9;Q15149-7;Q15149-8;Q15149-5;Q15149-3	Q15149	PLEC	Plectin
NaN	NaN	22.5881	20.856	NaN	NaN	NaN	NaN	9	919.392	0.019093	106.42	AEEDPAAAF	P09497;P09497-2	P09497	CLTB	Clathrin light chain B
NaN	NaN	25.3123	23.0085	NaN	NaN	NaN	NaN	9	985.414	0.080544	72.234	AEEDPAHAF	Q9H0K1	Q9H0K1	SIK2	Serine/threonine-protein kinase SIK2
NaN	NaN	NaN	NaN	NaN	NaN	NaN	NaN	9	988.483	0.055011	81.297	AEEDRVSAL	A7E2Y1	A7E2Y1	MYH7B	Myosin-7B
NaN	NaN	NaN	NaN	23.6817	NaN	NaN	NaN	14	1660.84	0.0043255	117.7	AEEEFNIEKGRLVQ	P36543;P36543-2;P36543-3;Q96A05	P36543	ATP6V1E1;ATP6V1E2	V-type proton ATPase subunit E 1;V-type proton ATPase subunit E 2
NaN	NaN	25.1896	23.8138	NaN	NaN	NaN	NaN	9	1153.54	0.0027892	166.96	AEEEFVQRF	P82933	P82933	MRPS9	28S ribosomal protein S9, mitochondrial
NaN	NaN	20.7896	23.973	NaN	NaN	NaN	NaN	9	1062.53	0.0081129	136.16	AEEEGLRLF	Q5T8I3;Q5T8I3-2	Q5T8I3	FAM102B	Protein FAM102B
NaN	NaN	27.043	24.7968	NaN	NaN	NaN	NaN	11	1275.65	0.0015512	140.45	AEEEIGTPRKF	P28749;P28749-2	P28749	RBL1	Retinoblastoma-like protein 1
NaN	NaN	24.3543	NaN	NaN	NaN	NaN	NaN	9	1089.57	0.046158	85.676	AEEEIMKKI	O00425	O00425	IGF2BP3	Insulin-like growth factor 2 mRNA-binding protein 3
NaN	NaN	21.136	NaN	NaN	NaN	NaN	NaN	11	1363.71	0.030514	84.658	AEEELRKKQAY	Q9Y2J4;Q9Y2J4-3;Q9Y2J4-2;Q9Y2J4-4	Q9Y2J4	AMOTL2	Angiomotin-like protein 2
NaN	NaN	23.2666	NaN	NaN	NaN	NaN	NaN	11	1227.58	0.0011929	143.85	AEEEPVITHGF	Q9NQ66;Q9NQ66-2	Q9NQ66	PLCB1	1-phosphatidylinositol 4,5-bisphosphate phosphodiesterase beta-1
NaN	NaN	24.0273	NaN	NaN	NaN	NaN	NaN	9	1031.49	0.045228	101.33	AEEERKAAE	Q96M32	Q96M32	AK7	Adenylate kinase 7
NaN	NaN	NaN	NaN	NaN	NaN	NaN	NaN	9	1107.56	0.01104	118.74	AEEESFRKL	Q14257	Q14257	RCN2	Reticulocalbin-2
NaN	NaN	25.7157	NaN	NaN	NaN	NaN	NaN	10	1187.56	0.018389	101.64	AEEETLGRHF	Q9NYQ8	Q9NYQ8	FAT2	Protocadherin Fat 2
NaN	NaN	24.6642	NaN	NaN	NaN	NaN	NaN	9	1055.54	0.05719	80.219	AEEHPKKAF	Q9UMZ2;Q9UMZ2-6;Q9UMZ2-8;Q9UMZ2-3;Q9UMZ2-7	Q9UMZ2	SYNRG	Synergin gamma
NaN	NaN	NaN	NaN	NaN	NaN	NaN	NaN	16	1845.97	1.72e-07	145.69	AEEHVRVTKAFSVNIF	P11279;P11279-2	P11279	LAMP1	Lysosome-associated membrane glycoprotein 1
NaN	NaN	NaN	NaN	NaN	NaN	NaN	NaN	9	1027.6	0.012298	116.25	AEEIKVARI	Q9BZQ8	Q9BZQ8	FAM129A	Protein Niban
NaN	NaN	NaN	NaN	NaN	NaN	NaN	NaN	11	1227.71	0.011374	110.14	AEEILEKGLKV	P62913;P62913-2	P62913	RPL11	60S ribosomal protein L11
NaN	NaN	NaN	NaN	NaN	NaN	NaN	NaN	9	1014.51	0.05625	80.684	AEEIRNGNL	Q8IVL0;Q8IVL0-3;Q8IVL0-2;Q8IVL1;Q8IVL1-2;Q8IVL1-4;Q8IVL1-8;Q8IVL1-9;Q8IVL1-10;Q8IVL1-13;Q8IVL1-12;Q8IVL1-11;Q8IVL1-3	Q8IVL1	NAV3;NAV2	Neuron navigator 3;Neuron navigator 2
NaN	NaN	NaN	25.0021	NaN	NaN	NaN	NaN	9	1085.55	0.034535	92.838	AEEKLTHKM	P16949;P16949-2	P16949	STMN1	Stathmin
NaN	NaN	28.1421	NaN	NaN	NaN	NaN	NaN	9	1066.53	0.0041225	154.35	AEEKQTKSF	Q00341;Q00341-2	Q00341	HDLBP	Vigilin
NaN	NaN	26.7282	23.7648	NaN	NaN	NaN	NaN	9	1093.5	0.0045452	152.89	AEELERQGY	Q7KZ85	Q7KZ85	SUPT6H	Transcription elongation factor SPT6
NaN	NaN	27.9034	28.5452	NaN	NaN	NaN	NaN	9	1109.59	0.013038	101.64	AEELFARKF	Q00610;Q00610-2	Q00610	CLTC	Clathrin heavy chain 1
NaN	NaN	NaN	NaN	NaN	NaN	NaN	NaN	9	1024.49	0.057821	79.906	AEELGHRDV	P42771;P42771-2;P42771-4	P42771	CDKN2A	Cyclin-dependent kinase inhibitor 2A
NaN	NaN	25.5372	22.8047	NaN	NaN	NaN	NaN	10	1148.5	0.013164	138.83	AEELGHTETY	Q9Y2G9;Q9Y2G9-3	Q9Y2G9	SBNO2	Protein strawberry notch homolog 2
NaN	26.5977	NaN	NaN	NaN	NaN	NaN	NaN	8	970.476	0.096137	87.582	AEELHYPL	Q14257;Q14257-2	Q14257	RCN2	Reticulocalbin-2
NaN	NaN	22.7259	23.5359	NaN	NaN	NaN	NaN	10	1220.61	0.046333	73.887	AEELIRDGRY	Q13217	Q13217	DNAJC3	DnaJ homolog subfamily C member 3
NaN	NaN	NaN	25.5384	NaN	NaN	NaN	NaN	9	1095.53	0.010463	119.89	AEELLTHHF	Q99759;Q99759-2	Q99759	MAP3K3	Mitogen-activated protein kinase kinase kinase 3
NaN	NaN	22.7479	NaN	NaN	NaN	NaN	NaN	10	1162.58	0.078187	93.262	AEELPHIHAF	Q9H3K6	Q9H3K6	BOLA2	BolA-like protein 2
22.7315	NaN	NaN	NaN	NaN	NaN	NaN	NaN	9	999.571	0.0047552	133.33	AEELRAKAL	Q9BWW8	Q9BWW8	APOL6	Apolipoprotein L6
20.5555	NaN	NaN	NaN	NaN	NaN	NaN	NaN	8	997.498	0.1557	75.109	AEELRHPF	Q12802;Q12802-2;Q12802-4	Q12802	AKAP13	A-kinase anchor protein 13
NaN	NaN	NaN	NaN	NaN	NaN	NaN	NaN	9	1097.51	0.054503	93.262	AEENGFRYI	Q9H1Y0;Q9H1Y0-2	Q9H1Y0	ATG5	Autophagy protein 5
NaN	NaN	24.5913	23.9475	NaN	NaN	NaN	NaN	9	1093.54	0.009532	122.52	AEENTRVLY	Q9Y5T5;Q9Y5T5-4;Q9Y5T5-3;Q9Y5T5-2	Q9Y5T5	USP16	Ubiquitin carboxyl-terminal hydrolase 16
NaN	NaN	25.3813	NaN	NaN	NaN	NaN	NaN	9	929.388	0.072737	74.517	AEEPGGHAY	Q9Y2H5	Q9Y2H5	PLEKHA6	Pleckstrin homology domain-containing family A member 6
NaN	NaN	24.0947	NaN	NaN	NaN	NaN	NaN	10	1106.52	0.056714	85.38	AEEPGSLKNY	Q9P2S6-3;Q9P2S6-2	Q9P2S6-3
NaN	NaN	23.399	NaN	NaN	NaN	NaN	NaN	11	1297.59	0.059126	85.676	AEEPNIDIHNF	O75110	O75110	ATP9A	Probable phospholipid-transporting ATPase IIA
NaN	NaN	NaN	NaN	NaN	NaN	NaN	NaN	10	1068.59	0.04802	108.81	AEEPRGGLKI	Q9UHB7;Q9UHB7-2	Q9UHB7	AFF4	AF4/FMR2 family member 4
NaN	NaN	25.1306	NaN	NaN	NaN	NaN	NaN	11	1305.7	0.0077793	106.26	AEERAEAKKKF	Q9H6Z9	Q9H6Z9	EGLN3	Egl nine homolog 3
NaN	NaN	24.5511	NaN	NaN	NaN	NaN	NaN	9	1053.59	0.035075	82.749	AEERPRIAL	Q14689;Q14689-6;Q9Y2E4	Q14689	DIP2A;DIP2C	Disco-interacting protein 2 homolog A;Disco-interacting protein 2 homolog C
25.4888	20.7447	NaN	NaN	NaN	NaN	NaN	NaN	9	1164.63	0.061478	78.098	AEERRKYTL	P55081	P55081	MFAP1	Microfibrillar-associated protein 1
NaN	NaN	23.146	NaN	NaN	NaN	NaN	NaN	9	1058.57	0.089557	69.598	AEERVQKSL	Q15149;Q15149-4;Q15149-2;Q15149-6;Q15149-9;Q15149-7;Q15149-8;Q15149-5;Q15149-3	Q15149	PLEC	Plectin
NaN	NaN	26.228	24.4332	NaN	NaN	NaN	NaN	10	1077.55	0.038664	93.374	AEESAIRVGF	P53992	P53992	SEC24C	Protein transport protein Sec24C
NaN	NaN	26.569	NaN	NaN	NaN	NaN	NaN	10	1196.53	7.1e-19	213.85	AEESDLSRQY	Q12789;Q12789-3	Q12789	GTF3C1	General transcription factor 3C polypeptide 1
NaN	NaN	24.2442	NaN	NaN	NaN	NaN	NaN	9	901.476	0.13861	60.39	AEETAVALV	Q08174;Q08174-2	Q08174	PCDH1	Protocadherin-1
NaN	NaN	NaN	NaN	NaN	NaN	NaN	NaN	9	967.497	0.080747	68.422	AEETGVHII	Q96BW5;Q96BW5-2	Q96BW5	PTER	Phosphotriesterase-related protein
NaN	NaN	NaN	NaN	20.437	22.6999	19.6738	NaN	13	1551.78	8.44e-07	175.49	AEFAFSLYRQLAH	P01009;P01009-2;P01009-3	P01009	SERPINA1	Alpha-1-antitrypsin;Short peptide from AAT
NaN	NaN	NaN	NaN	NaN	22.2725	NaN	NaN	14	1679.84	1.12e-15	154.1	AEFAFSLYRQLAHQ	P01009;P01009-2;P01009-3	P01009	SERPINA1	Alpha-1-antitrypsin;Short peptide from AAT
21.1961	NaN	23.0232	NaN	NaN	NaN	NaN	NaN	11	1406.75	0.04762	79.974	AEFAPNKRRRY	Q15233;Q15233-2	Q15233	NONO	Non-POU domain-containing octamer-binding protein
23.5682	22.6451	23.8134	22.4329	NaN	NaN	NaN	NaN	9	1036.54	0.01502	110.87	AEFARIMSI	P12814;P12814-2;P12814-3;P12814-4	P12814	ACTN1	Alpha-actinin-1
NaN	NaN	19.4804	23.1627	NaN	NaN	NaN	NaN	9	969.444	0.1137	76.847	AEFDAVVGY	Q9Y2Y0;Q9Y2Y0-2	Q9Y2Y0	ARL2BP	ADP-ribosylation factor-like protein 2-binding protein
NaN	NaN	NaN	NaN	NaN	NaN	NaN	NaN	10	1212.6	0.044094	109.48	AEFDKLYNTL	Q96BR1;Q96BR1-2	Q96BR1	SGK3	Serine/threonine-protein kinase Sgk3
NaN	NaN	NaN	21.5196	NaN	NaN	NaN	NaN	9	1046.49	0.085062	70.912	AEFDLNPEL	Q7LDG7-2;Q7LDG7;Q7LDG7-4;Q7LDG7-3	Q7LDG7-2	RASGRP2	RAS guanyl-releasing protein 2
NaN	NaN	23.501	NaN	NaN	NaN	NaN	NaN	9	1088.55	0.048398	84.568	AEFEEPRVI	P30533	P30533	LRPAP1	Alpha-2-macroglobulin receptor-associated protein
NaN	NaN	NaN	NaN	NaN	NaN	NaN	NaN	9	1139.62	0.033987	78.113	AEFEILKKY	Q9Y366	Q9Y366	IFT52	Intraflagellar transport protein 52 homolog
NaN	NaN	NaN	NaN	NaN	NaN	NaN	NaN	10	1240.6	0.044492	89.913	AEFEKDFKEV	Q9H930;Q9H930-2	Q9H930	SP140L	Nuclear body protein SP140-like protein
NaN	NaN	26.7328	25.8959	NaN	NaN	NaN	NaN	9	1104.62	0.0056096	149.19	AEFEKIQKL	Q8N5Y8;Q8N5Y8-3	Q8N5Y8	PARP16	Mono [ADP-ribose] polymerase PARP16
NaN	NaN	NaN	NaN	NaN	NaN	NaN	NaN	10	1239.61	0.0079734	121.5	AEFEKNFKEV	Q13342;Q13342-3;Q13342-6;Q13342-5	Q13342	SP140	Nuclear body protein SP140
NaN	NaN	26.8067	25.0148	NaN	NaN	NaN	NaN	9	1064.52	0.033735	93.429	AEFELPKTM	P78318	P78318	IGBP1	Immunoglobulin-binding protein 1
NaN	NaN	25.4803	24.9063	NaN	NaN	NaN	NaN	9	1091.47	0.0090344	141.78	AEFEQGHQF	Q12899	Q12899	TRIM26	Tripartite motif-containing protein 26
NaN	22.2108	27.742	24.8283	NaN	NaN	NaN	NaN	10	1246.67	0.045526	77.677	AEFEQKINRL	Q15154;Q15154-2	Q15154	PCM1	Pericentriolar material 1 protein
NaN	NaN	NaN	NaN	NaN	NaN	NaN	NaN	9	1175.64	0.062334	67.993	AEFERQRKI	Q9NWB6;Q9NWB6-3;Q9NWB6-2	Q9NWB6	ARGLU1	Arginine and glutamate-rich protein 1
NaN	NaN	22.6168	23.9165	NaN	NaN	NaN	NaN	9	1121.5	0.080556	86.472	AEFEVHEVY	Q9UQ80;Q9UQ80-2	Q9UQ80	PA2G4	Proliferation-associated protein 2G4
NaN	NaN	25.8899	24.5648	NaN	NaN	NaN	NaN	9	1062.57	0.011568	130.75	AEFEVVRTI	P42025	P42025	ACTR1B	Beta-centractin
NaN	NaN	24.567	22.1653	NaN	NaN	NaN	NaN	11	1390.62	0.0015863	140.11	AEFFQMESQKF	Q13618;Q13618-2;Q13618-3	Q13618	CUL3	Cullin-3
NaN	NaN	22.4067	20.7131	NaN	NaN	NaN	NaN	9	925.455	0.1038	65.803	AEFGVVAAY	Q03169	Q03169	TNFAIP2	Tumor necrosis factor alpha-induced protein 2
NaN	NaN	NaN	NaN	NaN	NaN	NaN	NaN	9	1113.56	0.0097542	121.29	AEFHFTHLI	P55268;P07942	P55268	LAMB2;LAMB1	Laminin subunit beta-2;Laminin subunit beta-1
NaN	NaN	24.8002	NaN	NaN	NaN	NaN	NaN	11	1244.59	0.0404	77.062	AEFHGSGLKHY	Q9UHI8	Q9UHI8	ADAMTS1	A disintegrin and metalloproteinase with thrombospondin motifs 1
NaN	NaN	NaN	NaN	NaN	NaN	NaN	NaN	9	1028.49	0.074068	74.127	AEFHQIEGV	Q9Y285;Q9Y285-2	Q9Y285	FARSA	Phenylalanine--tRNA ligase alpha subunit
NaN	NaN	NaN	NaN	NaN	NaN	NaN	NaN	10	1127.56	0.058707	84.743	AEFHQIEGVV	Q9Y285;Q9Y285-2	Q9Y285	FARSA	Phenylalanine--tRNA ligase alpha subunit
NaN	NaN	NaN	NaN	NaN	NaN	NaN	NaN	9	1015.5	0.030767	95.62	AEFIETHGI	Q2M1Z3	Q2M1Z3	ARHGAP31	Rho GTPase-activating protein 31
NaN	NaN	NaN	NaN	NaN	NaN	NaN	NaN	9	1066.61	0.0095895	121.62	AEFIKFTVI	Q6EKJ0;Q86UP8;Q86UP8-3;P78347;P78347-2;P78347-4;P78347-3	P78347	GTF2IRD2B;GTF2IRD2;GTF2I	General transcription factor II-I repeat domain-containing protein 2B;General transcription factor II-I repeat domain-containing protein 2A;General transcription factor II-I
NaN	NaN	24.8294	NaN	NaN	NaN	NaN	NaN	9	960.564	0.08465	67.032	AEFIVAKAI	O43242;O43242-2	O43242	PSMD3	26S proteasome non-ATPase regulatory subunit 3
NaN	NaN	NaN	NaN	NaN	NaN	NaN	NaN	12	1288.71	0.11088	68.893	AEFIVAKAIRDG	O43242;O43242-2	O43242	PSMD3	26S proteasome non-ATPase regulatory subunit 3
NaN	NaN	21.1562	23.2965	NaN	NaN	NaN	NaN	9	982.512	0.064047	77.058	AEFIVGGKY	P48729;P48729-2;P48729-3	P48729	CSNK1A1	Casein kinase I isoform alpha
NaN	NaN	NaN	25.9579	NaN	NaN	NaN	NaN	9	1081.54	0.037877	90.37	AEFKEAFQL	P60660;P60660-2	P60660	MYL6	Myosin light polypeptide 6
NaN	NaN	23.8556	NaN	NaN	NaN	NaN	NaN	9	1111.58	0.088188	59.35	AEFKKGNRY	Q9UPR3	Q9UPR3	SMG5	Protein SMG5
NaN	NaN	NaN	NaN	NaN	NaN	NaN	NaN	9	1090.61	0.011326	118.18	AEFKNITRI	P24386	P24386	CHM	Rab proteins geranylgeranyltransferase component A 1
NaN	NaN	NaN	23.3671	NaN	NaN	NaN	NaN	9	1090.61	0.019868	94.692	AEFKQIRSI	Q14289;Q14289-2	Q14289	PTK2B	Protein-tyrosine kinase 2-beta
NaN	NaN	NaN	NaN	NaN	NaN	NaN	NaN	9	1046.62	0.0016497	172.11	AEFKRAVKV	Q8IYU8	Q8IYU8	MICU2	Calcium uptake protein 2, mitochondrial
NaN	NaN	NaN	NaN	NaN	NaN	NaN	NaN	9	1106.57	0.10094	66.27	AEFLNRETK	Q8NE18	Q8NE18	NSUN7	Putative methyltransferase NSUN7
22.4673	23.7521	NaN	NaN	NaN	NaN	NaN	NaN	9	1079.54	0.0013433	147.19	AEFNRIMSL	O43707;O43707-2;O43707-3	O43707	ACTN4	Alpha-actinin-4
NaN	NaN	NaN	NaN	NaN	NaN	NaN	NaN	9	1045.52	0.077074	86.866	AEFPHSFLV	Q7Z6J4;Q7Z6J4-4	Q7Z6J4	FGD2	FYVE, RhoGEF and PH domain-containing protein 2
NaN	NaN	NaN	NaN	NaN	NaN	NaN	NaN	9	1105.58	0.0078262	138.26	AEFQKQKEV	P48775	P48775	TDO2	Tryptophan 2,3-dioxygenase
NaN	NaN	NaN	25.5524	NaN	NaN	NaN	NaN	9	1109.55	0.0081626	135.79	AEFQRLPSY	P08575;P08575-2	P08575	PTPRC	Receptor-type tyrosine-protein phosphatase C
NaN	NaN	NaN	23.5183	NaN	NaN	NaN	NaN	10	1192.62	0.033817	96.253	AEFQSIPRVF	P08575;P08575-2	P08575	PTPRC	Receptor-type tyrosine-protein phosphatase C
NaN	NaN	NaN	NaN	NaN	NaN	NaN	NaN	10	1259.7	0.0060306	123.35	AEFREQILRV	P11234;P11234-3;P11234-2	P11234	RALB	Ras-related protein Ral-B
NaN	NaN	NaN	NaN	NaN	NaN	NaN	NaN	11	1163.5	0.036437	87.181	AEFSPEDSPSV	Q6ZUJ8;Q6ZUJ8-2	Q6ZUJ8	PIK3AP1	Phosphoinositide 3-kinase adapter protein 1
21.5261	NaN	NaN	NaN	NaN	NaN	NaN	NaN	9	962.482	0.0086516	131.41	AEFSRPASV	Q9H4G0;Q9H4G0-2;Q9H4G0-4;Q9H4G0-3	Q9H4G0	EPB41L1	Band 4.1-like protein 1
NaN	NaN	29.4783	25.5894	NaN	NaN	NaN	NaN	10	1140.62	0.002263	167.12	AEFTKSIAKF	Q15005	Q15005	SPCS2	Signal peptidase complex subunit 2
NaN	NaN	NaN	NaN	NaN	NaN	NaN	NaN	9	957.492	0.028258	97.473	AEFVGVSHL	Q9ULX3	Q9ULX3	NOB1	RNA-binding protein NOB1
NaN	NaN	NaN	NaN	NaN	NaN	NaN	NaN	9	991.486	0.042907	87.284	AEFVSTPEL	Q9UBQ7;Q9UBQ7-2	Q9UBQ7	GRHPR	Glyoxylate reductase/hydroxypyruvate reductase
NaN	NaN	NaN	NaN	NaN	NaN	NaN	NaN	8	932.533	0.047186	110.61	AEFVVQKI	O75165	O75165	DNAJC13	DnaJ homolog subfamily C member 13
NaN	NaN	NaN	NaN	NaN	NaN	NaN	NaN	14	1558.85	0.0084823	104.52	AEFWINGTPLVKKG	P02743	P02743	APCS	Serum amyloid P-component;Serum amyloid P-component(1-203)
NaN	NaN	23.4819	NaN	NaN	NaN	NaN	NaN	10	1239.52	0.002512	146.81	AEFYHPGQEY	P68400;Q8NEV1;P68400-2	P68400	CSNK2A1;CSNK2A3	Casein kinase II subunit alpha;Casein kinase II subunit alpha 3
NaN	NaN	21.8568	24.2945	NaN	NaN	NaN	NaN	9	837.434	0.072737	74.517	AEGAGLHAL	O75064	O75064	DENND4B	DENN domain-containing protein 4B
NaN	NaN	22.5179	24.0943	NaN	NaN	NaN	NaN	9	904.393	0.015444	110.41	AEGAPSPNY	P22681	P22681	CBL	E3 ubiquitin-protein ligase CBL
NaN	NaN	25.603	22.3559	NaN	NaN	NaN	NaN	9	845.395	0.040216	88.643	AEGASAPLM	P14923	P14923	JUP	Junction plakoglobin
NaN	NaN	20.4207	22.2973	NaN	NaN	NaN	NaN	9	877.418	0.041401	88.029	AEGDIGAVF	P40939	P40939	HADHA	Trifunctional enzyme subunit alpha, mitochondrial;Long-chain enoyl-CoA hydratase;Long chain 3-hydroxyacyl-CoA dehydrogenase
NaN	NaN	NaN	NaN	NaN	NaN	NaN	NaN	10	987.487	0.055207	85.862	AEGDIGKAEV	Q68DQ2	Q68DQ2	CRYBG3	Very large A-kinase anchor protein
NaN	NaN	29.5733	28.4628	NaN	NaN	NaN	NaN	9	1029.48	0.0071653	143.11	AEGDLIEHF	Q13151	Q13151	HNRNPA0	Heterogeneous nuclear ribonucleoprotein A0
NaN	NaN	NaN	NaN	NaN	NaN	21.0382	NaN	16	1752.95	0.21573	40.187	AEGDVAALNRRIQLVE	P67936	P67936	TPM4	Tropomyosin alpha-4 chain
NaN	NaN	NaN	28.0596	NaN	NaN	NaN	NaN	9	1022.53	0.023072	114.99	AEGEIYTKL	Q8TAG9;Q8TAG9-2	Q8TAG9	EXOC6	Exocyst complex component 6
NaN	NaN	NaN	NaN	NaN	NaN	NaN	NaN	9	986.54	0.068262	75.825	AEGEKVKQV	Q14254	Q14254	FLOT2	Flotillin-2
NaN	NaN	23.1511	NaN	NaN	NaN	NaN	NaN	9	933.408	0.052972	82.305	AEGEVDPAF	Q9UQ53;Q9UQ53-3;Q9UQ53-2	Q9UQ53	MGAT4B	Alpha-1,3-mannosyl-glycoprotein 4-beta-N-acetylglucosaminyltransferase B
NaN	NaN	23.5755	NaN	NaN	NaN	NaN	NaN	10	1171.6	0.027874	99.802	AEGEVVQVRW	O75164;O75164-2	O75164	KDM4A	Lysine-specific demethylase 4A
NaN	NaN	24.0154	NaN	NaN	NaN	NaN	NaN	11	1303.63	0.044909	89.266	AEGFHARLQEF	Q8IWA4;Q8IWA4-3;Q8IWA4-2	Q8IWA4	MFN1	Mitofusin-1
NaN	NaN	24.8139	23.4431	NaN	NaN	NaN	NaN	10	1200.56	0.018035	107.57	AEGFISRMQY	P40121;P40121-2	P40121	CAPG	Macrophage-capping protein
NaN	NaN	21.2853	NaN	NaN	NaN	NaN	NaN	9	931.465	0.035805	91.9	AEGFPTPTI	P32004;P32004-2;P32004-3	P32004	L1CAM	Neural cell adhesion molecule L1
NaN	NaN	NaN	NaN	NaN	NaN	NaN	NaN	9	946.462	0.02111	104.21	AEGHHAVNI	Q14678;Q14678-2	Q14678	KANK1	KN motif and ankyrin repeat domain-containing protein 1
NaN	NaN	23.2551	19.6793	NaN	NaN	NaN	NaN	10	1150.58	0.043722	72.243	AEGHIIHIDF	Q9UBF8;Q9UBF8-2;Q9UBF8-3	Q9UBF8	PI4KB	Phosphatidylinositol 4-kinase beta
NaN	NaN	25.0894	18.6656	NaN	NaN	NaN	NaN	9	918.456	0.021386	103.91	AEGHPAPQI	O94898	O94898	LRIG2	Leucine-rich repeats and immunoglobulin-like domains protein 2
NaN	NaN	NaN	NaN	NaN	NaN	NaN	NaN	9	992.504	0.052674	82.452	AEGHQPQKV	P12980	P12980	LYL1	Protein lyl-1
NaN	NaN	23.4904	24.2056	NaN	NaN	NaN	NaN	9	1025.45	0.028807	97.068	AEGHYTVSY	Q8N0X7	Q8N0X7	SPG20	Spartin
NaN	NaN	28.4854	27.0131	NaN	NaN	NaN	NaN	9	958.451	0.009359	122.18	AEGIHTGQF	P62917	P62917	RPL8	60S ribosomal protein L8
NaN	NaN	30.2414	26.2782	NaN	NaN	NaN	NaN	11	1220.58	0.0045027	120.87	AEGIHTGQFVY	P62917	P62917	RPL8	60S ribosomal protein L8
NaN	NaN	23.5436	NaN	NaN	NaN	NaN	NaN	10	1107.58	0.016259	108.98	AEGKLISVEY	Q8IVG5;Q8IVG5-2	Q8IVG5	SAMD9L	Sterile alpha motif domain-containing protein 9-like
NaN	NaN	23.7696	23.9336	NaN	NaN	NaN	NaN	8	872.483	0.028587	128.61	AEGLATRR	Q7KZF4	Q7KZF4	SND1	Staphylococcal nuclease domain-containing protein 1
NaN	NaN	NaN	NaN	NaN	NaN	NaN	NaN	9	1035.5	0.022655	92.439	AEGLDTQRF	P01732;P01732-2;P01732-3	P01732	CD8A	T-cell surface glycoprotein CD8 alpha chain
NaN	NaN	NaN	NaN	NaN	NaN	NaN	NaN	9	966.513	0.035033	92.47	AEGLNLHTI	P36405	P36405	ARL3	ADP-ribosylation factor-like protein 3
24.9687	NaN	NaN	NaN	NaN	NaN	NaN	NaN	9	1014.51	0.013967	122.44	AEGLRNENL	Q86WV1;Q86WV1-2	Q86WV1	SKAP1	Src kinase-associated phosphoprotein 1
NaN	NaN	26.4132	NaN	NaN	NaN	NaN	NaN	9	1017.49	0.014389	112.11	AEGNHIKSY	Q5T7W0;Q5T7W0-2;Q5T7W0-4	Q5T7W0	ZNF618	Zinc finger protein 618
NaN	NaN	22.234	NaN	NaN	NaN	NaN	NaN	9	998.471	0.11053	64.757	AEGNTVFVY	A8MW92	A8MW92	PHF20L1	PHD finger protein 20-like protein 1
20.0811	NaN	NaN	NaN	NaN	NaN	NaN	NaN	12	1266.65	0.035775	78.655	AEGPEVDVNLPK	Q09666	Q09666	AHNAK	Neuroblast differentiation-associated protein AHNAK
NaN	NaN	27.3814	25.219	NaN	NaN	NaN	NaN	9	1031.54	0.021715	103.74	AEGPNRLLY	Q643R3	Q643R3	LPCAT4	Lysophospholipid acyltransferase LPCAT4
NaN	NaN	30.8961	27.3603	NaN	NaN	NaN	NaN	9	922.524	0.013686	113.5	AEGPPRLAI	Q15773	Q15773	MLF2	Myeloid leukemia factor 2
NaN	NaN	NaN	NaN	NaN	NaN	NaN	NaN	9	944.508	0.051032	83.265	AEGPRAVFV	P19532;P19532-2	P19532	TFE3	Transcription factor E3
NaN	NaN	NaN	NaN	NaN	NaN	NaN	NaN	9	839.475	0.064769	76.847	AEGPVAVVV	Q86UK7;Q86UK7-2;Q86UK7-3;Q86UK7-4	Q86UK7	ZNF598	Zinc finger protein 598
NaN	NaN	NaN	NaN	NaN	NaN	NaN	NaN	9	829.418	0.032231	94.539	AEGPVGSTL	Q8WXE0;Q8WXE0-2	Q8WXE0	CASKIN2	Caskin-2
NaN	NaN	NaN	NaN	NaN	NaN	NaN	NaN	9	940.523	0.070888	69.423	AEGPVVEKI	Q9P2D1;Q9P2D1-2;Q9P2D1-3	Q9P2D1	CHD7	Chromodomain-helicase-DNA-binding protein 7
NaN	NaN	24.7882	23.9312	NaN	NaN	NaN	NaN	10	1133.57	0.11497	87.181	AEGQLTLQQF	Q7LFL8;Q7LFL8-2	Q7LFL8	CXXC5	CXXC-type zinc finger protein 5
NaN	NaN	23.9751	NaN	NaN	NaN	NaN	NaN	11	1234.63	0.015897	86.344	AEGQPSTVKRY	Q5H9F3;Q5H9F3-2;Q5H9F3-3	Q5H9F3	BCORL1	BCL-6 corepressor-like protein 1
NaN	NaN	24.2281	NaN	NaN	NaN	NaN	NaN	10	1178.53	0.01118	115.7	AEGQRQAQEY	P05783;CON__P05784	P05783	KRT18	Keratin, type I cytoskeletal 18
NaN	NaN	24.1459	22.0626	NaN	NaN	NaN	NaN	11	1206.59	0.0042729	136.99	AEGQSPLSQKY	Q96F24;Q96F24-3	Q96F24	NRBF2	Nuclear receptor-binding factor 2
NaN	NaN	23.6163	NaN	NaN	NaN	NaN	NaN	11	1194.59	0.077882	94.692	AEGQTSINKTF	Q9BZ95;Q9BZ95-4;Q9BZ95-5;Q9BZ95-2	Q9BZ95	WHSC1L1	Histone-lysine N-methyltransferase NSD3
NaN	NaN	NaN	23.7065	NaN	NaN	NaN	NaN	9	945.513	0.10076	79.893	AEGQTSKLL	Q9Y336;Q9Y336-2	Q9Y336	SIGLEC9	Sialic acid-binding Ig-like lectin 9
NaN	NaN	NaN	NaN	NaN	NaN	NaN	NaN	9	951.525	0.045782	90.37	AEGRPPRAV	Q8TER5;Q8TER5-4;Q8TER5-3;Q8TER5-2	Q8TER5	ARHGEF40	Rho guanine nucleotide exchange factor 40
NaN	NaN	NaN	23.4553	NaN	NaN	NaN	NaN	9	947.486	0.033715	85.212	AEGSAVKRM	Q14814;Q14814-4;Q14814-6;Q14814-3;Q14814-5;Q14814-2	Q14814	MEF2D	Myocyte-specific enhancer factor 2D
NaN	NaN	24.8561	NaN	NaN	NaN	NaN	NaN	11	1250.62	0.047025	83.862	AEGSPFRGQRF	Q8IVD9	Q8IVD9	NUDCD3	NudC domain-containing protein 3
NaN	NaN	NaN	NaN	NaN	NaN	NaN	NaN	9	993.467	0.072051	71.342	AEGSPHFHL	Q693B1;Q693B1-2	Q693B1	KCTD11	BTB/POZ domain-containing protein KCTD11
NaN	NaN	28.7001	NaN	NaN	NaN	NaN	NaN	9	972.499	0.0031947	162.5	AEGTAQQRL	Q15149;Q15149-4;Q15149-2;Q15149-6;Q15149-9;Q15149-7;Q15149-8;Q15149-5;Q15149-3	Q15149	PLEC	Plectin
NaN	NaN	NaN	NaN	NaN	NaN	NaN	NaN	9	918.481	0.055225	81.191	AEGTFPGKI	P14854	P14854	COX6B1	Cytochrome c oxidase subunit 6B1
NaN	NaN	NaN	NaN	NaN	NaN	NaN	NaN	9	859.465	0.01458	111.73	AEGTITGVI	Q96HY6	Q96HY6	DDRGK1	DDRGK domain-containing protein 1
NaN	NaN	26.886	NaN	NaN	NaN	NaN	NaN	9	945.549	0.026002	99.139	AEGTLSKKL	P42696	P42696	RBM34	RNA-binding protein 34
NaN	NaN	NaN	NaN	NaN	NaN	NaN	NaN	9	993.488	0.0217	103.56	AEGTNFRTV	Q8WUM4;Q8WUM4-2	Q8WUM4	PDCD6IP	Programmed cell death 6-interacting protein
NaN	NaN	NaN	NaN	NaN	NaN	NaN	NaN	9	946.508	0.094257	68.224	AEGTSTRLI	Q96KV7	Q96KV7	WDR90	WD repeat-containing protein 90
23.6846	NaN	NaN	NaN	NaN	NaN	NaN	NaN	8	906.424	0.095057	91.584	AEGTVFHF	Q969X6;Q969X6-3;Q969X6-2	Q969X6	CIRH1A	Cirhin
NaN	NaN	NaN	NaN	21.7289	NaN	NaN	NaN	15	1582.83	0.00081476	111.79	AEGVIVGHWAPPIHT	Q92673	Q92673	SORL1	Sortilin-related receptor
NaN	NaN	25.2999	23.7164	NaN	NaN	NaN	NaN	9	863.403	0.0084322	133.81	AEGVPASAY	Q8IUW3	Q8IUW3	SPATA2L	Spermatogenesis-associated protein 2-like protein
NaN	NaN	NaN	NaN	NaN	NaN	NaN	NaN	10	1081.54	0.035322	86.833	AEHADTVQLV	Q9BSJ2;Q9BSJ2-4;Q9BSJ2-3	Q9BSJ2	TUBGCP2	Gamma-tubulin complex component 2
NaN	NaN	24.2327	NaN	NaN	NaN	NaN	NaN	9	1002.49	0.030206	104.01	AEHAGVRTY	Q9Y2H5	Q9Y2H5	PLEKHA6	Pleckstrin homology domain-containing family A member 6
21.3824	NaN	NaN	NaN	NaN	NaN	NaN	NaN	9	940.455	0.043819	86.833	AEHARGMGL	A4D1U4	A4D1U4	LCHN	Protein LCHN
NaN	NaN	22.6149	21.5328	NaN	NaN	NaN	NaN	10	1214.59	0.012758	112.84	AEHDQLLLNY	P20700	P20700	LMNB1	Lamin-B1
NaN	NaN	23.3077	25.487	NaN	NaN	NaN	NaN	9	1033.44	0.018166	107.43	AEHDSELSF	Q9UNA1;Q9UNA1-2	Q9UNA1	ARHGAP26	Rho GTPase-activating protein 26
NaN	NaN	28.1923	NaN	NaN	NaN	NaN	NaN	9	1060.52	0.023622	107.9	AEHDVTVKY	Q8IYS1	Q8IYS1	PM20D2	Peptidase M20 domain-containing protein 2
NaN	NaN	26.9764	22.1027	NaN	NaN	NaN	NaN	10	1223.58	0.0064998	126.07	AEHDVTVKYY	Q8IYS1	Q8IYS1	PM20D2	Peptidase M20 domain-containing protein 2
22.6597	NaN	NaN	NaN	NaN	NaN	NaN	NaN	10	1196.56	0.055917	66.486	AEHENLRTPM	Q8NDX1;Q8NDX1-2	Q8NDX1	PSD4	PH and SEC7 domain-containing protein 4
21.2121	NaN	NaN	NaN	NaN	NaN	NaN	NaN	9	1066.54	0.037511	90.64	AEHERELAL	Q01082;Q01082-3;Q01082-2;O15020;O15020-2	Q01082	SPTBN1;SPTBN2	Spectrin beta chain, non-erythrocytic 1;Spectrin beta chain, non-erythrocytic 2
NaN	NaN	25.3728	NaN	NaN	NaN	NaN	NaN	9	1157.53	0.02256	102.62	AEHFEKHNF	Q96KP1	Q96KP1	EXOC2	Exocyst complex component 2
NaN	NaN	27.4763	25.7493	NaN	NaN	NaN	NaN	9	1131.5	0.013038	114.78	AEHFLEQQM	P49368;P49368-2	P49368	CCT3	T-complex protein 1 subunit gamma
NaN	NaN	NaN	NaN	NaN	NaN	NaN	NaN	9	1090.58	0.050325	71.501	AEHFYLKAL	Q8TE82	Q8TE82	SH3TC1	SH3 domain and tetratricopeptide repeat-containing protein 1
NaN	NaN	NaN	NaN	NaN	NaN	NaN	NaN	9	1054.54	0.025777	99.305	AEHIESRTL	Q99541	Q99541	PLIN2	Perilipin-2
NaN	NaN	NaN	NaN	NaN	NaN	NaN	NaN	11	1238.66	0.0020664	135.55	AEHIESRTLAI	Q99541	Q99541	PLIN2	Perilipin-2
NaN	NaN	NaN	NaN	NaN	NaN	NaN	NaN	9	990.586	0.061142	71.877	AEHIKPVVV	O75146;O75146-2	O75146	HIP1R	Huntingtin-interacting protein 1-related protein
NaN	NaN	NaN	NaN	NaN	NaN	NaN	NaN	9	1022.61	0.0081572	135.83	AEHIKSLLI	Q68E01;Q68E01-2;Q68E01-3;Q68E01-4	Q68E01	INTS3	Integrator complex subunit 3
22.2091	21.5213	NaN	NaN	NaN	NaN	NaN	NaN	9	919.476	0.075071	86.866	AEHIPSGPL	Q9Y520;Q9Y520-2;Q9Y520-6;Q9Y520-4;Q9Y520-5;Q9Y520-7;Q9Y520-3	Q9Y520	PRRC2C	Protein PRRC2C
NaN	NaN	NaN	NaN	NaN	NaN	NaN	NaN	9	1074.58	0.014235	112.41	AEHKHIEVI	Q96KQ7;Q96KQ7-2	Q96KQ7	EHMT2	Histone-lysine N-methyltransferase EHMT2
NaN	NaN	24.7653	NaN	NaN	NaN	NaN	NaN	9	1093.62	0.0091185	109.29	AEHKIDLRL	Q86VU5	Q86VU5	COMTD1	Catechol O-methyltransferase domain-containing protein 1
NaN	NaN	NaN	NaN	NaN	NaN	NaN	NaN	8	876.445	0.01795	146.94	AEHLAHSL	P23508;P23508-2	P23508	MCC	Colorectal mutant cancer protein
NaN	NaN	27.9545	25.7085	NaN	NaN	NaN	NaN	11	1344.62	0.00017725	147.19	AEHLGDFHRTY	Q92530	Q92530	PSMF1	Proteasome inhibitor PI31 subunit
NaN	NaN	NaN	NaN	NaN	NaN	NaN	NaN	9	953.445	0.014929	111.04	AEHLGEAEV	Q13724;Q13724-2	Q13724	MOGS	Mannosyl-oligosaccharide glucosidase
23.6071	NaN	NaN	NaN	NaN	NaN	NaN	NaN	9	1103.66	0.02003	91.318	AEHLRPLRL	Q9H2S9;Q9H2S9-2	Q9H2S9	IKZF4	Zinc finger protein Eos
NaN	NaN	22.8899	NaN	NaN	NaN	NaN	NaN	9	1084.53	0.019532	113.5	AEHLTSHKY	Q9NR56;Q9NR56-3;Q9NR56-4;Q9NR56-7;Q9NR56-2;Q9NR56-5	Q9NR56	MBNL1	Muscleblind-like protein 1
NaN	NaN	NaN	23.3471	NaN	NaN	NaN	NaN	9	1137.53	0.028802	97.071	AEHLTYLEY	Q7LDG7-2;Q7LDG7;Q7LDG7-4	Q7LDG7-2	RASGRP2	RAS guanyl-releasing protein 2
NaN	NaN	24.4029	NaN	NaN	NaN	NaN	NaN	13	1312.63	0.073419	58.674	AEHNLSSVLDTGA	Q7RTP6;Q7RTP6-2;Q7RTP6-4;Q7RTP6-3	Q7RTP6	MICAL3	Protein-methionine sulfoxide oxidase MICAL3
NaN	NaN	NaN	NaN	NaN	NaN	NaN	NaN	9	929.472	0.02567	99.384	AEHPAGHLV	Q15397	Q15397	KIAA0020	Pumilio domain-containing protein KIAA0020
NaN	NaN	24.8105	NaN	NaN	NaN	NaN	NaN	9	1100.53	0.018289	92.051	AEHPELRSY	Q12765;Q12765-2;Q12765-3	Q12765	SCRN1	Secernin-1
NaN	NaN	26.7741	NaN	NaN	NaN	NaN	NaN	9	979.484	0.033809	93.374	AEHPGRNSI	O60437	O60437	PPL	Periplakin
NaN	NaN	NaN	NaN	NaN	NaN	NaN	NaN	9	1004.6	0.10331	65.88	AEHPLKLVV	Q9Y5I7	Q9Y5I7	CLDN16	Claudin-16
NaN	NaN	NaN	NaN	NaN	NaN	NaN	NaN	10	1093.58	0.010441	117.04	AEHPNVTLTI	Q8IUX4	Q8IUX4	APOBEC3F	DNA dC->dU-editing enzyme APOBEC-3F
25.3672	23.6965	NaN	NaN	NaN	NaN	NaN	NaN	9	1075.65	0.017896	107.29	AEHPRLLKL	Q01415	Q01415	GALK2	N-acetylgalactosamine kinase
NaN	NaN	NaN	NaN	NaN	NaN	NaN	NaN	8	907.513	0.022998	151.29	AEHPTIKI	Q5GLZ8;Q5GLZ8-6;Q5GLZ8-2;Q5GLZ8-3	Q5GLZ8	HERC4	Probable E3 ubiquitin-protein ligase HERC4
NaN	NaN	NaN	23.2065	NaN	NaN	NaN	NaN	9	1137.59	0.037152	90.696	AEHQRKQEI	Q12929;Q12929-2	Q12929	EPS8	Epidermal growth factor receptor kinase substrate 8
NaN	NaN	NaN	NaN	NaN	NaN	NaN	NaN	9	1093.57	0.060818	87.181	AEHQRRQGL	Q15154;Q15154-2	Q15154	PCM1	Pericentriolar material 1 protein
NaN	NaN	NaN	NaN	NaN	NaN	NaN	NaN	8	956.45	0.084104	91.906	AEHQVRSM	Q14671;Q14671-4;Q14671-2;Q14671-3	Q14671	PUM1	Pumilio homolog 1
NaN	NaN	26.6086	20.4801	NaN	NaN	NaN	NaN	10	1296.63	0.025776	84.31	AEHREVRHTY	Q8NAN2;Q8NAN2-2	Q8NAN2	FAM73A	Protein FAM73A
NaN	NaN	NaN	NaN	NaN	NaN	NaN	NaN	10	1055.49	0.013942	110.81	AEHSESGQLV	P40227;P40227-2	P40227	CCT6A	T-complex protein 1 subunit zeta
NaN	NaN	NaN	NaN	NaN	NaN	NaN	NaN	9	949.523	0.017957	107.66	AEHSLPALI	Q8N8D1	Q8N8D1	PDCD7	Programmed cell death protein 7
NaN	NaN	26.9856	22.7678	NaN	NaN	NaN	NaN	9	1065.52	0.0082962	157.99	AEHSLPHYL	Q5T4B2	Q5T4B2	CERCAM	Probable inactive glycosyltransferase 25 family member 3
NaN	NaN	26.907	26.6211	NaN	NaN	NaN	NaN	9	1003.5	0.01334	114.19	AEHSTVITF	Q709C8;Q709C8-4;Q709C8-2;Q709C8-3;Q96RL7;Q96RL7-2;Q96RL7-4;Q96RL7-3	Q709C8	VPS13C;VPS13A	Vacuolar protein sorting-associated protein 13C;Vacuolar protein sorting-associated protein 13A
NaN	NaN	25.3502	23.6154	NaN	NaN	NaN	NaN	9	1088.61	0.0084352	125.98	AEHTLLHRL	Q9BYK8;Q9BYK8-2;Q9BYK8-4	Q9BYK8	HELZ2	Helicase with zinc finger domain 2
22.1197	NaN	NaN	NaN	NaN	NaN	NaN	NaN	9	1064.58	0.035417	75.825	AEHVRRNAL	Q9H9L4;Q9H9L4-4	Q9H9L4	KANSL2	KAT8 regulatory NSL complex subunit 2
NaN	NaN	24.376	NaN	NaN	NaN	NaN	NaN	9	957.549	0.058018	65.404	AEIAAKDKL	Q9BVK6	Q9BVK6	TMED9	Transmembrane emp24 domain-containing protein 9
NaN	NaN	NaN	NaN	NaN	NaN	NaN	NaN	9	971.54	0.0091439	124.98	AEIAAQRTI	Q5T4S7;Q5T4S7-4;Q5T4S7-2;Q5T4S7-3	Q5T4S7	UBR4	E3 ubiquitin-protein ligase UBR4
NaN	NaN	24.6114	NaN	NaN	NaN	NaN	NaN	9	984.56	0.0081555	135.84	AEIAEIARL	Q9Y4F5;Q9Y4F5-2;Q9Y4F5-3	Q9Y4F5	CEP170B	Centrosomal protein of 170 kDa protein B
NaN	NaN	NaN	NaN	NaN	NaN	NaN	NaN	10	1091.57	0.025543	88.681	AEIAGHEPRI	Q13813;Q13813-3;Q13813-2	Q13813	SPTAN1	Spectrin alpha chain, non-erythrocytic 1
NaN	NaN	NaN	NaN	NaN	NaN	NaN	NaN	9	987.528	0.050046	83.753	AEIAPFVEI	P55060;P55060-4;P55060-3	P55060	CSE1L	Exportin-2
NaN	NaN	NaN	NaN	NaN	NaN	NaN	NaN	9	974.511	0.013686	113.5	AEIAQLMSL	P07900;P07900-2;Q14568;P08238;Q58FF8	P07900	HSP90AA1;HSP90AA2P;HSP90AB1;HSP90AB2P	Heat shock protein HSP 90-alpha;Heat shock protein HSP 90-alpha A2;Heat shock protein HSP 90-beta;Putative heat shock protein HSP 90-beta 2
NaN	NaN	24.9033	21.9189	NaN	NaN	NaN	NaN	10	1030.54	0.028716	101.65	AEIARSNASL	P12270	P12270	TPR	Nucleoprotein TPR
NaN	NaN	22.2065	24.7565	NaN	NaN	NaN	NaN	9	893.449	0.046803	85.357	AEIASALGY	O00141;O00141-4;O00141-3;O00141-5;O00141-2;Q96BR1;Q96BR1-2	O00141	SGK1;SGK3	Serine/threonine-protein kinase Sgk1;Serine/threonine-protein kinase Sgk3
NaN	NaN	28.1868	NaN	NaN	NaN	NaN	NaN	9	1091.61	0.020901	104.44	AEIATYRRL	P05783;CON__P05784	P05783	KRT18	Keratin, type I cytoskeletal 18
NaN	NaN	23.3665	22.7228	NaN	NaN	NaN	NaN	10	1050.57	0.010368	117.17	AEIDAHLVAL	P60900;P60900-2;P60900-3	P60900	PSMA6	Proteasome subunit alpha type-6
NaN	NaN	22.9104	21.0284	NaN	NaN	NaN	NaN	10	1143.52	0.095942	74.464	AEIDAHNDIF	P46939;P46939-2;P46939-4	P46939	UTRN	Utrophin
NaN	NaN	27.9171	24.6792	NaN	NaN	NaN	NaN	10	1136.51	0.0041632	134.77	AEIDARNDSF	Q01082;Q01082-3;Q01082-2	Q01082	SPTBN1	Spectrin beta chain, non-erythrocytic 1
NaN	NaN	24.0349	NaN	NaN	NaN	NaN	NaN	10	1157.63	0.020109	105.94	AEIDDKLNKI	Q8WXH0;Q8WXH0-2;Q8WXH0-7;Q8WXH0-13	Q8WXH0	SYNE2	Nesprin-2
NaN	NaN	27.532	NaN	NaN	NaN	NaN	NaN	9	1086.57	0.026002	99.139	AEIDDRKQL	Q96P16;Q96P16-3	Q96P16	RPRD1A	Regulation of nuclear pre-mRNA domain-containing protein 1A
NaN	NaN	NaN	23.8161	NaN	NaN	NaN	NaN	9	1004.45	0.095088	67.981	AEIDEPNAF	Q8NB46	Q8NB46	ANKRD52	Serine/threonine-protein phosphatase 6 regulatory ankyrin repeat subunit C
NaN	NaN	26.1292	23.1056	NaN	NaN	NaN	NaN	10	1151.57	0.034622	95.775	AEIDKLATEY	Q9UNL4;Q9UNL4-2;Q9UNL4-4;Q9UNL4-5;Q9UNL4-8;Q9UNL4-7;Q9UNL4-6;Q9UNL4-3	Q9UNL4	ING4	Inhibitor of growth protein 4
NaN	NaN	23.8561	NaN	NaN	NaN	NaN	NaN	11	1282.74	0.0081153	94.692	AEIDLRQGRLL	Q6RFH5;Q6RFH5-2	Q6RFH5	WDR74	WD repeat-containing protein 74
NaN	NaN	NaN	NaN	NaN	NaN	NaN	NaN	11	1239.67	0.0068888	116.52	AEIDPKQLVDI	Q8WYA0;Q8WYA0-3	Q8WYA0	IFT81	Intraflagellar transport protein 81 homolog
NaN	NaN	24.3619	NaN	NaN	NaN	NaN	NaN	10	1176.63	0.0099697	102.52	AEIDRRISAF	Q9NS73;Q9NS73-3;Q9NS73-2;Q9NS73-5	Q9NS73	MBIP	MAP3K12-binding inhibitory protein 1
NaN	NaN	27.8253	27.179	NaN	NaN	NaN	NaN	9	1024.52	0.017565	108.09	AEIDSIHQL	Q9P2W9	Q9P2W9	STX18	Syntaxin-18
NaN	NaN	27.0608	NaN	NaN	NaN	NaN	NaN	9	1052.48	0.0054989	149.57	AEIEADRSY	Q13753;Q13753-2	Q13753	LAMC2	Laminin subunit gamma-2
NaN	NaN	23.4235	24.1578	NaN	NaN	NaN	NaN	9	1032.52	0.02628	98.933	AEIEALEKM	O14730;O14730-2	O14730	RIOK3	Serine/threonine-protein kinase RIO3
NaN	NaN	25.0037	NaN	NaN	NaN	NaN	NaN	10	1176.59	0.02702	100.48	AEIEARADRF	O15020;O15020-2	O15020	SPTBN2	Spectrin beta chain, non-erythrocytic 2
NaN	NaN	NaN	NaN	NaN	NaN	NaN	NaN	9	1029.51	0.014447	98.299	AEIEEANRV	Q13563;Q13563-5;Q13563-3	Q13563	PKD2	Polycystin-2
NaN	NaN	26.6779	NaN	NaN	NaN	NaN	NaN	11	1328.7	0.0032976	126.07	AEIEEDKARRI	P78527;P78527-2	P78527	PRKDC	DNA-dependent protein kinase catalytic subunit
NaN	NaN	NaN	NaN	NaN	NaN	NaN	NaN	9	1023.52	0.0086801	131.04	AEIEHEALI	Q96N67;Q96N67-3;Q96N67-2;Q96N67-4;Q96N67-5;Q96N67-6	Q96N67	DOCK7	Dedicator of cytokinesis protein 7
NaN	NaN	23.9864	NaN	NaN	NaN	NaN	NaN	9	1107.57	0.015238	110.63	AEIEHFIHL	Q13733	Q13733	ATP1A4	Sodium/potassium-transporting ATPase subunit alpha-4
NaN	NaN	31.5755	27.6012	NaN	NaN	NaN	NaN	9	1073.62	0.017951	107.66	AEIEIMKKL	Q9Y6M1;Q9Y6M1-1;Q9Y6M1-5;Q9Y6M1-6;Q9Y6M1-3;Q9Y6M1-4	Q9Y6M1	IGF2BP2	Insulin-like growth factor 2 mRNA-binding protein 2
NaN	NaN	27.6548	26.0686	NaN	NaN	NaN	NaN	9	1028.58	0.025137	121.09	AEIEIVKDL	P13674;P13674-2;P13674-3	P13674	P4HA1	Prolyl 4-hydroxylase subunit alpha-1
NaN	NaN	25.7469	20.3437	NaN	NaN	NaN	NaN	10	1205.62	0.062919	94.692	AEIEIVKEEF	Q8WXH0;Q8WXH0-2	Q8WXH0	SYNE2	Nesprin-2
NaN	NaN	26.8184	24.8963	NaN	NaN	NaN	NaN	10	1177.63	0.0056736	128.93	AEIEKLGQKY	Q9Y324	Q9Y324	FCF1	rRNA-processing protein FCF1 homolog
NaN	NaN	NaN	NaN	NaN	NaN	NaN	NaN	9	1013.58	0.0021309	138.78	AEIEKQLAL	P56559;P56559-2	P56559	ARL4C	ADP-ribosylation factor-like protein 4C
NaN	NaN	24.4355	NaN	NaN	NaN	NaN	NaN	9	1057.57	0.031122	95.358	AEIENIKEL	Q86VG3;Q86VG3-2	Q86VG3	C11orf74	Uncharacterized protein C11orf74
NaN	NaN	24.7272	NaN	NaN	NaN	NaN	NaN	10	1199.55	0.01253	113.26	AEIENKGYNY	Q08AF3;Q08AF3-2	Q08AF3	SLFN5	Schlafen family member 5
NaN	NaN	25.754	23.4576	NaN	NaN	NaN	NaN	10	1249.66	0.0014904	161.17	AEIEQKIKEY	Q9NS23;Q9NS23-2;Q9NS23-9;Q9NS23-4;Q9NS23-5	Q9NS23	RASSF1	Ras association domain-containing protein 1
NaN	NaN	NaN	NaN	NaN	NaN	NaN	NaN	9	1016.54	0.059419	79.116	AEIEQTITL	Q01484;Q01484-2;Q01484-5;Q01484-7	Q01484	ANK2	Ankyrin-2
NaN	NaN	24.5751	23.3383	NaN	NaN	NaN	NaN	8	988.501	0.046572	111.04	AEIERMQI	Q9NQH7;Q9NQH7-3;Q9NQH7-5;Q9NQH7-2;Q9NQH7-4	Q9NQH7	XPNPEP3	Probable Xaa-Pro aminopeptidase 3
NaN	NaN	NaN	NaN	NaN	NaN	NaN	NaN	10	1089.56	0.012281	113.71	AEIETDKATI	P10515	P10515	DLAT	Dihydrolipoyllysine-residue acetyltransferase component of pyruvate dehydrogenase complex, mitochondrial
NaN	NaN	23.725	20.6092	NaN	NaN	NaN	NaN	10	1143.61	0.036446	94.692	AEIETRIAEL	Q6ZRS2;Q6ZRS2-3;Q6ZRS2-2	Q6ZRS2	SRCAP	Helicase SRCAP
NaN	NaN	NaN	NaN	NaN	NaN	NaN	NaN	11	1027.56	0.0012183	143.61	AEIGADGIAVI	Q9BXD5;Q9BXD5-2;Q9BXD5-4;Q9BXD5-3	Q9BXD5	NPL	N-acetylneuraminate lyase
NaN	NaN	NaN	23.5577	NaN	NaN	NaN	NaN	9	853.382	0.0028978	166.05	AEIGASGSY	Q7L5A3;Q7L5A3-3;Q7L5A3-2	Q7L5A3	FAM214B	Protein FAM214B
NaN	NaN	NaN	NaN	NaN	NaN	NaN	NaN	9	871.501	0.043751	86.866	AEIGAVTLV	Q9BSV6	Q9BSV6	TSEN34	tRNA-splicing endonuclease subunit Sen34
NaN	NaN	26.197	22.1895	NaN	NaN	NaN	NaN	12	1239.61	0.00042543	162.34	AEIGEGAYGKVF	Q00534	Q00534	CDK6	Cyclin-dependent kinase 6
NaN	NaN	NaN	23.4328	NaN	NaN	NaN	NaN	9	1137.58	0.03396	81.548	AEIGHHRRY	Q86TJ2	Q86TJ2	TADA2B	Transcriptional adapter 2-beta
NaN	NaN	26.6008	NaN	NaN	NaN	NaN	NaN	10	1133.61	0.0027463	155.42	AEIGNKDIKF	Q8TCJ2	Q8TCJ2	STT3B	Dolichyl-diphosphooligosaccharide--protein glycosyltransferase subunit STT3B
NaN	NaN	23.2561	NaN	NaN	NaN	NaN	NaN	10	1148.58	0.0076294	122.19	AEIGNTIERF	Q9Y573;Q9Y573-2	Q9Y573	IPP	Actin-binding protein IPP
NaN	NaN	25.3533	22.317	NaN	NaN	NaN	NaN	10	1113.6	0.0030232	151.83	AEIGQVKQEL	Q8IUD2	Q8IUD2	ERC1	ELKS/Rab6-interacting/CAST family member 1
NaN	NaN	23.3913	NaN	NaN	NaN	NaN	NaN	9	1039.48	0.13094	61.582	AEIGRNYSM	O75925;O75925-2;O75925-3	O75925	PIAS1	E3 SUMO-protein ligase PIAS1
NaN	NaN	23.4844	NaN	NaN	NaN	NaN	NaN	9	1130.56	0.0089247	127.84	AEIHHFHQI	Q96RF0-2	Q96RF0-2	SNX18	Sorting nexin-18
NaN	NaN	NaN	NaN	NaN	NaN	NaN	NaN	9	1075.58	0.048821	84.359	AEIHLPHFI	Q9Y2G2-3;Q9Y2G2-5;Q9Y2G2;Q9Y2G2-2;Q9Y2G2-4	Q9Y2G2-3	CARD8	Caspase recruitment domain-containing protein 8
NaN	NaN	24.1057	NaN	NaN	NaN	NaN	NaN	10	1103.67	0.040238	79.974	AEIIKGAKKF	P50748	P50748	KNTC1	Kinetochore-associated protein 1
NaN	NaN	NaN	NaN	NaN	NaN	NaN	NaN	9	1054.67	0.0040839	154.49	AEIIKQLKI	Q5VTR2	Q5VTR2	RNF20	E3 ubiquitin-protein ligase BRE1A
NaN	NaN	NaN	NaN	NaN	NaN	NaN	NaN	9	1075.6	0.0093621	122.13	AEIIRFLTN	P55160;P55160-2	P55160	NCKAP1L	Nck-associated protein 1-like
NaN	NaN	26.4254	24.6755	NaN	NaN	NaN	NaN	9	1047.58	0.032024	105.57	AEIISRRGF	P55265;P55265-4;P55265-5;P55265-3;P55265-2	P55265	ADAR	Double-stranded RNA-specific adenosine deaminase
NaN	NaN	NaN	NaN	NaN	NaN	NaN	NaN	8	900.492	0.012191	152.31	AEIITNQI	P04150;P04150-13;P04150-12;P04150-11;P04150-8;P04150-10;P04150-3;P04150-16;P04150-15;P04150-14;P04150-5	P04150	NR3C1	Glucocorticoid receptor
NaN	NaN	25.3713	18.3359	NaN	NaN	NaN	NaN	11	1234.66	0.0051892	100.55	AEIKADKEKGF	A4D1P6;A4D1P6-3;A4D1P6-2	A4D1P6	WDR91	WD repeat-containing protein 91
NaN	NaN	27.948	NaN	NaN	NaN	NaN	NaN	9	915.539	0.0088434	134.05	AEIKAGKSL	B1AK53;B1AK53-2	B1AK53	ESPN	Espin
NaN	NaN	22.1269	NaN	NaN	NaN	NaN	NaN	12	1333.7	0.067757	78.939	AEIKAIFPNGQF	Q13191;Q13191-3;Q13191-2	Q13191	CBLB	E3 ubiquitin-protein ligase CBL-B
NaN	NaN	25.9914	NaN	NaN	NaN	NaN	NaN	10	1191.69	0.0066709	115.89	AEIKALKEKY	Q96G01;Q96G01-4;Q96G01-3	Q96G01	BICD1	Protein bicaudal D homolog 1
NaN	NaN	23.138	NaN	NaN	NaN	NaN	NaN	10	1156.68	0.065271	70.412	AEIKAQKKEL	Q9BZF9;Q9BZF9-2	Q9BZF9	UACA	Uveal autoantigen with coiled-coil domains and ankyrin repeats
NaN	NaN	NaN	22.5247	NaN	NaN	NaN	NaN	9	1020.51	0.060999	78.334	AEIKDGLEF	Q5R3I4	Q5R3I4	TTC38	Tetratricopeptide repeat protein 38
NaN	NaN	NaN	NaN	NaN	NaN	NaN	NaN	9	994.545	0.050934	83.313	AEIKDIGHL	A6NIN4	A6NIN4		Putative uncharacterized protein FLJ38447
NaN	NaN	22.9509	NaN	NaN	NaN	NaN	NaN	8	1034.59	0.021223	142.64	AEIKKQYR	Q9UGP8	Q9UGP8	SEC63	Translocation protein SEC63 homolog
NaN	NaN	NaN	NaN	NaN	NaN	NaN	NaN	9	1026.65	0.038988	77.732	AEIKLKRAV	Q96PU8;Q96PU8-9;Q96PU8-8;Q96PU8-6;Q96PU8-3;Q96PU8-5	Q96PU8	QKI	Protein quaking
NaN	NaN	22.7184	NaN	NaN	NaN	NaN	NaN	10	1156.68	0.13375	57.348	AEIKLRLDSI	P28370;P28370-2	P28370	SMARCA1	Probable global transcription activator SNF2L1
NaN	NaN	NaN	NaN	NaN	NaN	NaN	NaN	9	1014.61	0.0083415	134.48	AEIKNSLKI	O75475	O75475	PSIP1	PC4 and SFRS1-interacting protein
NaN	NaN	23.6951	NaN	NaN	NaN	NaN	NaN	10	1178.62	0.013323	111.82	AEIKQIVSEY	Q567U6	Q567U6	CCDC93	Coiled-coil domain-containing protein 93
NaN	NaN	NaN	NaN	NaN	NaN	NaN	NaN	9	1026.65	0.0075929	139.97	AEIKRKLGI	P55327;P55327-4;P55327-5;P55327-6;P55327-7;P55327-8;P55327-2;P55327-3	P55327	TPD52	Tumor protein D52
NaN	NaN	NaN	NaN	NaN	NaN	NaN	NaN	9	942.575	0.079144	81.548	AEIKVIGTI	Q9H2W1;Q9H2W1-2;Q9H2W1-5;Q9H2W1-4;Q9H2W1-3	Q9H2W1	MS4A6A	Membrane-spanning 4-domains subfamily A member 6A
NaN	NaN	NaN	NaN	NaN	NaN	NaN	NaN	8	912.601	0.038138	109.01	AEIKVKLI	Q9BPX3	Q9BPX3	NCAPG	Condensin complex subunit 3
NaN	NaN	23.2129	20.8725	NaN	NaN	NaN	NaN	10	1159.66	0.0064283	150.05	AEILALQKQF	Q96CP6;Q96CP6-2;Q96CP6-3	Q96CP6	GRAMD1A	GRAM domain-containing protein 1A
NaN	NaN	NaN	NaN	NaN	NaN	NaN	NaN	10	886.476	0.0025899	144.35	AEILGSGAGI	Q9BX95	Q9BX95	SGPP1	Sphingosine-1-phosphate phosphatase 1
NaN	NaN	24.424	NaN	NaN	NaN	NaN	NaN	9	1105.6	0.068162	66.621	AEILKEKEF	Q5VT06	Q5VT06	CEP350	Centrosome-associated protein 350
22.2178	22.7068	NaN	NaN	NaN	NaN	NaN	NaN	8	948.564	0.039365	134.08	AEILKTKF	Q9Y2L1;Q9Y2L1-2	Q9Y2L1	DIS3	Exosome complex exonuclease RRP44
NaN	NaN	23.8734	21.7228	NaN	NaN	NaN	NaN	9	1054.71	0.052519	82.529	AEILLKKKI	O95373	O95373	IPO7	Importin-7
NaN	NaN	26.5625	26.2296	NaN	NaN	NaN	NaN	9	1058.54	0.0029765	165.11	AEILLSNHY	Q8TEM1	Q8TEM1	NUP210	Nuclear pore membrane glycoprotein 210
NaN	NaN	NaN	NaN	NaN	NaN	NaN	NaN	9	1025.63	0.03241	81.296	AEILRGVRL	O00567	O00567	NOP56	Nucleolar protein 56
NaN	NaN	NaN	NaN	21.3467	NaN	NaN	NaN	14	1468.74	0.037428	73.985	AEILTYPSAFGSIT	Q86X76;Q86X76-5;Q86X76-2;Q86X76-4;Q86X76-3	Q86X76	NIT1	Nitrilase homolog 1
NaN	NaN	23.5877	24.4733	NaN	NaN	NaN	NaN	9	1029.56	0.072885	69.998	AEIMQAVRL	Q96Q07;Q96Q07-3;Q96Q07-2	Q96Q07	BTBD9	BTB/POZ domain-containing protein 9
NaN	NaN	NaN	NaN	NaN	NaN	NaN	NaN	9	1052.53	0.043819	86.833	AEIMRSFSL	P01569;P01563;P01568;P32881	P01569	IFNA5;IFNA2;IFNA21;IFNA8	Interferon alpha-5;Interferon alpha-2;Interferon alpha-21;Interferon alpha-8
NaN	NaN	NaN	NaN	NaN	NaN	NaN	NaN	9	1055.6	0.0066283	145.65	AEINEIIRV	P18206;P18206-2;P18206-3	P18206	VCL	Vinculin
NaN	NaN	27.5025	23.6022	NaN	NaN	NaN	NaN	11	1333.63	2.75e-09	198.72	AEINENNVREF	Q9NS73;Q9NS73-3;Q9NS73-2;Q9NS73-5	Q9NS73	MBIP	MAP3K12-binding inhibitory protein 1
NaN	NaN	28.4474	24.8529	NaN	NaN	NaN	NaN	9	1026.61	0.0044994	171.73	AEINNIIKI	P11388;P11388-2;P11388-3;P11388-4;Q02880;Q02880-2	P11388	TOP2A;TOP2B	DNA topoisomerase 2-alpha;DNA topoisomerase 2-beta
NaN	NaN	22.9784	24.1002	NaN	NaN	NaN	NaN	9	941.518	0.037326	90.777	AEINQAALL	Q8TEL6;Q8TEL6-3;Q8TEL6-2	Q8TEL6	TRPC4AP	Short transient receptor potential channel 4-associated protein
NaN	NaN	NaN	NaN	NaN	NaN	NaN	NaN	11	1174.63	0.030079	108.43	AEINSRTGSKL	O75179;O75179-7;O75179-6;O75179-2;Q8IWZ3;Q8IWZ3-6;Q8IWZ3-4	O75179	ANKRD17;ANKHD1	Ankyrin repeat domain-containing protein 17;Ankyrin repeat and KH domain-containing protein 1
NaN	NaN	25.8017	NaN	NaN	NaN	NaN	NaN	9	1053.56	0.0069925	144.38	AEINTTHRI	Q5TEA3	Q5TEA3	C20orf194	Uncharacterized protein C20orf194
NaN	NaN	23.2611	27.5787	NaN	NaN	NaN	NaN	10	1115.59	0.044853	89.698	AEIPADPKLY	Q8NF50;Q8NF50-4;Q8NF50-3;Q8NF50-2	Q8NF50	DOCK8	Dedicator of cytokinesis protein 8
NaN	NaN	24.5994	22.6888	NaN	NaN	NaN	NaN	10	1102.57	0.1018	73.26	AEIPQQVVGY	O75131	O75131	CPNE3	Copine-3
NaN	NaN	23.7261	NaN	NaN	NaN	NaN	NaN	10	1203.58	0.034845	95.642	AEIQDMKQEL	O00258;O00258-2	O00258	WRB	Tail-anchored protein insertion receptor WRB
NaN	NaN	NaN	NaN	NaN	NaN	NaN	NaN	10	1152.58	0.046743	110.79	AEIQELHQSV	O60826	O60826	CCDC22	Coiled-coil domain-containing protein 22
NaN	NaN	25.3437	24.4944	NaN	NaN	NaN	NaN	9	1074.58	0.0093626	122.13	AEIQFAQRL	Q14684;Q14684-2	Q14684	RRP1B	Ribosomal RNA processing protein 1 homolog B
NaN	NaN	NaN	NaN	NaN	NaN	NaN	NaN	10	1093.55	0.011786	114.6	AEIQGNINHV	Q86VI3	Q86VI3	IQGAP3	Ras GTPase-activating-like protein IQGAP3
NaN	NaN	NaN	NaN	NaN	NaN	NaN	NaN	10	1084.59	1.49e-36	237.92	AEIQGNINKV	P46940;Q13576	P46940	IQGAP1;IQGAP2	Ras GTPase-activating-like protein IQGAP1;Ras GTPase-activating-like protein IQGAP2
NaN	NaN	NaN	NaN	NaN	NaN	NaN	NaN	10	1098.6	0.027053	100.45	AEIQNGVKQI	Q12904;Q12904-2	Q12904	AIMP1	Aminoacyl tRNA synthase complex-interacting multifunctional protein 1;Endothelial monocyte-activating polypeptide 2
NaN	NaN	NaN	NaN	NaN	NaN	NaN	NaN	9	1012.52	0.0086516	131.41	AEIQPQTQV	Q13308;Q13308-4;Q13308-2;Q13308-6;Q13308-3;Q13308-5	Q13308	PTK7	Inactive tyrosine-protein kinase 7
NaN	NaN	NaN	NaN	NaN	NaN	NaN	NaN	10	1242.62	0.0078466	121.73	AEIQQRQEEL	P29590;P29590-11;P29590-12;P29590-5;P29590-4;P29590-2;P29590-3;P29590-8;P29590-9;P29590-13;P29590-14;P29590-10	P29590	PML	Protein PML
NaN	NaN	23.3398	25.9445	NaN	NaN	NaN	NaN	9	1049.55	0.0090344	126.41	AEIQSRLAY	Q8IY17;Q8IY17-2;Q8IY17-3;Q8IY17-4;Q8IY17-5	Q8IY17	PNPLA6	Neuropathy target esterase
NaN	NaN	NaN	NaN	NaN	NaN	NaN	NaN	10	1148.62	0.078187	78.516	AEIQSRLAYV	Q8IY17;Q8IY17-2;Q8IY17-3;Q8IY17-4;Q8IY17-5	Q8IY17	PNPLA6	Neuropathy target esterase
NaN	NaN	NaN	NaN	NaN	NaN	NaN	NaN	9	1042.57	0.011719	117.4	AEIRELEAL	Q8TCX5;Q8TCX5-2	Q8TCX5	RHPN1	Rhophilin-1
NaN	NaN	NaN	NaN	NaN	NaN	NaN	NaN	9	1036.6	0.046446	97.635	AEIRHVLVT	P60660;P60660-2	P60660	MYL6	Myosin light polypeptide 6
NaN	NaN	22.9675	21.7391	NaN	NaN	NaN	NaN	10	1149.69	0.011625	126.07	AEIRHVLVTL	P60660;P60660-2	P60660	MYL6	Myosin light polypeptide 6
NaN	NaN	30.7395	24.7028	NaN	NaN	NaN	NaN	11	1300.79	0.037289	95.523	AEIRIIPAKKY	Q15392;Q15392-2	Q15392	DHCR24	Delta(24)-sterol reductase
NaN	NaN	23.898	23.3885	NaN	NaN	NaN	NaN	8	914.555	0.029184	128	AEIRLVSK	P19338	P19338	NCL	Nucleolin
NaN	NaN	24.3078	NaN	NaN	NaN	NaN	NaN	10	1265.72	0.082677	77.192	AEIRRFIKAY	O14647;O14647-2	O14647	CHD2	Chromodomain-helicase-DNA-binding protein 2
NaN	NaN	NaN	NaN	NaN	NaN	NaN	NaN	9	1063.58	0.077074	69.198	AEIRRFSSV	Q9H977	Q9H977	WDR54	WD repeat-containing protein 54
24.0364	NaN	NaN	NaN	NaN	NaN	NaN	NaN	9	1078.6	0.15105	58.981	AEIRRHLAN	Q96MZ0;Q96MZ0-4	Q96MZ0	GDAP1L1	Ganglioside-induced differentiation-associated protein 1-like 1
NaN	NaN	NaN	NaN	NaN	NaN	NaN	NaN	8	923.519	0.074104	95.815	AEIRVHTV	Q99832;Q99832-3;Q99832-4;Q99832-2	Q99832	CCT7	T-complex protein 1 subunit eta
NaN	NaN	22.5963	20.67	NaN	NaN	NaN	NaN	10	1225.63	0.091497	75.378	AEIRYEGILY	Q8ND56;Q8ND56-3;Q8ND56-2	Q8ND56	LSM14A	Protein LSM14 homolog A
NaN	NaN	24.9415	22.612	NaN	NaN	NaN	NaN	12	1507.84	0.0014528	115.8	AEIRYLVEKPKY	Q9NZ32	Q9NZ32	ACTR10	Actin-related protein 10
NaN	NaN	NaN	NaN	NaN	NaN	NaN	NaN	8	965.445	0.069828	97.798	AEISFEDR	P21333;P21333-2	P21333	FLNA	Filamin-A
NaN	NaN	NaN	NaN	NaN	NaN	NaN	NaN	9	1093.54	0.13051	61.65	AEISFEDRK	P21333;P21333-2	P21333	FLNA	Filamin-A
NaN	23.4904	NaN	NaN	NaN	NaN	NaN	NaN	9	1023.53	0.11023	64.803	AEISFTLML	Q9NYA1-2;Q9NYA1;Q9NYA1-3	Q9NYA1-2	SPHK1	Sphingosine kinase 1
NaN	NaN	26.3494	23.067	NaN	NaN	NaN	NaN	10	1157.58	0.0056875	128.86	AEISHRLEGF	Q96N67;Q96N67-3;Q96N67-2;Q96N67-4;Q96N67-5;Q96N67-6	Q96N67	DOCK7	Dedicator of cytokinesis protein 7
NaN	NaN	NaN	NaN	NaN	NaN	NaN	NaN	9	983.504	0.01663	109.11	AEISHTQKA	P01850;A0A5B9	P01850	TRBC1;TRBC2	T-cell receptor beta-1 chain C region;T-cell receptor beta-2 chain C region
NaN	NaN	NaN	NaN	NaN	NaN	NaN	NaN	9	1001.54	0.026006	99.136	AEISNDLKI	P54253	P54253	ATXN1	Ataxin-1
NaN	NaN	NaN	NaN	NaN	NaN	NaN	NaN	9	924.492	0.019147	124.89	AEISQPPAL	Q9BQ70	Q9BQ70	TCF25	Transcription factor 25
NaN	NaN	NaN	NaN	NaN	NaN	NaN	NaN	11	1217.63	0.029121	119.62	AEISSNSLERI	Q5T4S7;Q5T4S7-4;Q5T4S7-2;Q5T4S7-3;Q5T4S7-5	Q5T4S7	UBR4	E3 ubiquitin-protein ligase UBR4
NaN	NaN	26.9766	27.9333	NaN	NaN	NaN	NaN	9	958.534	0.055225	81.191	AEITDKLGL	P61204;P84077;P61204-2	P61204	ARF3;ARF1	ADP-ribosylation factor 3;ADP-ribosylation factor 1
NaN	NaN	24.1627	21.0432	NaN	NaN	NaN	NaN	12	1295.71	0.0033892	113.63	AEITDKLGLHSL	P61204;P84077;P61204-2	P61204	ARF3;ARF1	ADP-ribosylation factor 3;ADP-ribosylation factor 1
NaN	NaN	NaN	NaN	NaN	NaN	NaN	NaN	9	1037.58	0.013811	113.25	AEITELIHI	Q86YH6;Q86YH6-2	Q86YH6	PDSS2	Decaprenyl-diphosphate synthase subunit 2
NaN	NaN	25.4309	NaN	NaN	NaN	NaN	NaN	9	1086.6	0.0085628	116.05	AEITKEQRL	Q96II8;Q96II8-4;Q96II8-3;Q96II8-2	Q96II8	LRCH3	Leucine-rich repeat and calponin homology domain-containing protein 3
NaN	NaN	23.9253	19.3737	NaN	NaN	NaN	NaN	8	870.492	0.04011	117.18	AEITPKGR	Q9NPA8;Q9NPA8-2	Q9NPA8	ENY2	Transcription and mRNA export factor ENY2
NaN	NaN	24.1147	NaN	NaN	NaN	NaN	NaN	10	1054.61	0.02289	88.495	AEITPKGRAL	Q9NPA8;Q9NPA8-2	Q9NPA8	ENY2	Transcription and mRNA export factor ENY2
NaN	NaN	NaN	NaN	NaN	NaN	NaN	NaN	9	1007.53	0.020891	104.45	AEITYGQKV	O94905	O94905	ERLIN2	Erlin-2
NaN	NaN	32.0089	27.0477	NaN	NaN	NaN	NaN	11	1260.56	1.01e-39	236.92	AEIVEGENHTY	P21333;P21333-2	P21333	FLNA	Filamin-A
NaN	NaN	NaN	NaN	NaN	NaN	NaN	NaN	10	1111.67	0.012443	113.41	AEIVKRLNGI	Q08117;Q08117-2	Q08117	AES	Amino-terminal enhancer of split
NaN	NaN	NaN	20.8131	NaN	NaN	NaN	NaN	9	1122.55	0.1453	59.35	AEIVRQMNY	P61225;Q9Y3L5;P10114	P61225	RAP2B;RAP2C;RAP2A	Ras-related protein Rap-2b;Ras-related protein Rap-2c;Ras-related protein Rap-2a
NaN	NaN	NaN	NaN	NaN	NaN	NaN	NaN	8	873.517	0.038462	118.74	AEIVTKTI	O75643	O75643	SNRNP200	U5 small nuclear ribonucleoprotein 200 kDa helicase
NaN	NaN	NaN	NaN	NaN	NaN	NaN	NaN	9	991.497	0.008954	127.46	AEKAFQEGI	Q9UIG0;Q9UIG0-2	Q9UIG0	BAZ1B	Tyrosine-protein kinase BAZ1B
NaN	NaN	NaN	NaN	NaN	NaN	NaN	NaN	9	1021.56	0.089557	69.598	AEKAFTRSI	P19878;P19878-3;P19878-2;P19878-4	P19878	NCF2	Neutrophil cytosol factor 2
22.4102	24.4503	NaN	NaN	NaN	NaN	NaN	NaN	8	849.46	0.057769	110.81	AEKAFVSV	O15438;O15438-4;O15438-2	O15438	ABCC3	Canalicular multispecific organic anion transporter 2
NaN	NaN	NaN	NaN	26.2379	19.2626	NaN	NaN	15	1753.99	3.49e-08	159.31	AEKALDLINKRRRDG	P04196	P04196	HRG	Histidine-rich glycoprotein
NaN	NaN	NaN	NaN	NaN	NaN	NaN	NaN	9	1017.6	0.010772	119.27	AEKALFRAL	Q9Y2X3;O00567	O00567	NOP58;NOP56	Nucleolar protein 58;Nucleolar protein 56
NaN	NaN	NaN	NaN	NaN	26.2858	NaN	NaN	13	1655.92	0.017639	92.856	AEKALQEYRKKHR	P10909;P10909-4;P10909-5;P10909-2;P10909-3	P10909	CLU	Clusterin;Clusterin beta chain;Clusterin alpha chain
NaN	NaN	28.294	25.1398	NaN	NaN	NaN	NaN	10	1104.58	0.028964	99.136	AEKAPTNIVY	P15927;P15927-2;P15927-3	P15927	RPA2	Replication protein A 32 kDa subunit
NaN	NaN	23.4063	NaN	NaN	NaN	NaN	NaN	12	1427.75	0.061233	83.194	AEKAVIDLNNRW	Q01081;P0DN76;Q01081-4;Q01081-2	Q01081	U2AF1	Splicing factor U2AF 35 kDa subunit
23.6774	NaN	27.7412	23.0867	NaN	NaN	NaN	NaN	9	1087.53	0.0068745	144.79	AEKAYHEQL	P68363;P68363-2;P68366;P68366-2;Q71U36;Q71U36-2;Q13748;Q6PEY2;Q13748-2;Q9BQE3;Q9NY65;Q9NY65-2	Q9BQE3	TUBA1B;TUBA4A;TUBA1A;TUBA3C;TUBA3E;TUBA1C;TUBA8	Tubulin alpha-1B chain;Tubulin alpha-4A chain;Tubulin alpha-1A chain;Tubulin alpha-3C/D chain;Tubulin alpha-3E chain;Tubulin alpha-1C chain;Tubulin alpha-8 chain
NaN	NaN	25.3794	NaN	NaN	NaN	NaN	NaN	10	1107.51	0.0068332	124.92	AEKDSLDPSF	Q07666;Q07666-3;Q07666-2;Q5VWX1;O75525;O75525-2	Q07666	KHDRBS1;KHDRBS2;KHDRBS3	KH domain-containing, RNA-binding, signal transduction-associated protein 1;KH domain-containing, RNA-binding, signal transduction-associated protein 2;KH domain-containing, RNA-binding, signal transduction-associated protein 3
NaN	NaN	24.8147	NaN	NaN	NaN	NaN	NaN	12	1337.68	0.00044384	139.05	AEKDVTAKDSKF	Q8IVF2;Q8IVF2-3	Q8IVF2	AHNAK2	Protein AHNAK2
NaN	NaN	23.2872	NaN	NaN	NaN	NaN	NaN	9	1049.58	0.082664	71.614	AEKEAKLVY	Q6EMB2;Q6EMB2-2	Q6EMB2	TTLL5	Tubulin polyglutamylase TTLL5
NaN	NaN	25.5172	NaN	NaN	NaN	NaN	NaN	9	971.529	0.0037523	155.84	AEKEAKPSI	Q5T0Z8	Q5T0Z8	C6orf132	Uncharacterized protein C6orf132
NaN	NaN	23.3284	NaN	NaN	NaN	NaN	NaN	10	1272.64	0.020575	91.584	AEKEEENRRL	Q9UJU6;Q9UJU6-2;Q9UJU6-3;Q9UJU6-5;Q9UJU6-4;Q9UJU6-6	Q9UJU6	DBNL	Drebrin-like protein
NaN	NaN	23.656	NaN	NaN	NaN	NaN	NaN	9	1097.47	0.034121	93.143	AEKEFNETM	O75164;O75164-2	O75164	KDM4A	Lysine-specific demethylase 4A
NaN	NaN	24.7102	NaN	NaN	NaN	NaN	NaN	9	1120.61	0.037565	77.533	AEKELEKKF	Q9NQ48;Q9NQ48-2	Q9NQ48	LZTFL1	Leucine zipper transcription factor-like protein 1
NaN	NaN	23.5664	NaN	NaN	NaN	NaN	NaN	9	1129.58	0.05719	78.098	AEKELHEKF	Q14141-4;Q14141;Q14141-2;Q9NVA2;Q9NVA2-2	Q14141-4	SEPT6;SEPT11	Septin-6;Septin-11
NaN	NaN	NaN	NaN	NaN	NaN	NaN	NaN	9	946.497	0.0083415	134.48	AEKELTASV	P48634-2;P48634-3;P48634;P48634-4	P48634-2	PRRC2A	Protein PRRC2A
NaN	NaN	24.1781	24.2096	NaN	NaN	NaN	NaN	9	1015.55	0.0070798	143.73	AEKELVQSL	O15460;O15460-2	O15460	P4HA2	Prolyl 4-hydroxylase subunit alpha-2
NaN	NaN	26.6232	22.8781	NaN	NaN	NaN	NaN	9	1134.6	0.0054757	134.25	AEKEQVIRY	Q9BRK4	Q9BRK4	LZTS2	Leucine zipper putative tumor suppressor 2
NaN	NaN	27.797	NaN	NaN	NaN	NaN	NaN	10	1092.58	0.006595	128.86	AEKEVKGAVY	Q16531;Q16531-2	Q16531	DDB1	DNA damage-binding protein 1
NaN	NaN	24.2822	20.4995	NaN	NaN	NaN	NaN	9	1105.59	0.07565	63.076	AEKFLSHKF	Q9Y219;Q9Y219-2	Q9Y219	JAG2	Protein jagged-2
NaN	NaN	NaN	NaN	NaN	NaN	NaN	NaN	9	988.559	0.0079891	137.06	AEKFPVISV	Q96RF0-2;Q96RF0;Q96RF0-3	Q96RF0-2	SNX18	Sorting nexin-18
NaN	NaN	NaN	NaN	NaN	NaN	NaN	NaN	9	927.55	0.049651	95.531	AEKGVARVV	Q15723;Q15723-1;Q15723-4;Q15723-2;Q15723-3	Q15723	ELF2	ETS-related transcription factor Elf-2
21.4255	22.5002	NaN	NaN	NaN	NaN	NaN	NaN	9	1013.62	0.02065	111.39	AEKIRTALL	P49746;P49746-2	P49746	THBS3	Thrombospondin-3
NaN	NaN	NaN	NaN	NaN	NaN	NaN	NaN	9	1076.59	0.050259	83.647	AEKKEMKTI	O15144	O15144	ARPC2	Actin-related protein 2/3 complex subunit 2
NaN	NaN	22.9636	NaN	NaN	NaN	NaN	NaN	12	1377.73	0.0079826	106.11	AEKKVAEANQKY	Q8WWY3	Q8WWY3	PRPF31	U4/U6 small nuclear ribonucleoprotein Prp31
NaN	NaN	NaN	NaN	NaN	NaN	NaN	NaN	8	913.596	0.02419	133.12	AEKKVVKI	P82979	P82979	SARNP	SAP domain-containing ribonucleoprotein
NaN	NaN	NaN	NaN	NaN	NaN	NaN	NaN	9	958.534	0.010706	119.41	AEKLEALSV	P43487;P43487-2	P43487	RANBP1	Ran-specific GTPase-activating protein
NaN	NaN	NaN	NaN	NaN	NaN	NaN	NaN	9	904.502	0.011719	117.4	AEKLGFAGL	P48643;P48643-2	P48643	CCT5	T-complex protein 1 subunit epsilon
22.9474	NaN	NaN	NaN	NaN	NaN	NaN	NaN	9	830.45	0.013164	123.16	AEKLGGSAV	P23528	P23528	CFL1	Cofilin-1
24.2613	NaN	26.1824	23.7266	NaN	NaN	NaN	NaN	10	943.534	0.0068853	124.74	AEKLGGSAVI	P23528	P23528	CFL1	Cofilin-1
21.0459	NaN	NaN	NaN	NaN	NaN	NaN	NaN	17	1667.95	0.0070673	73.848	AEKLGGSAVISLEGKPL	P23528	P23528	CFL1	Cofilin-1
NaN	NaN	NaN	NaN	NaN	NaN	NaN	NaN	8	926.464	0.021725	140.98	AEKLHQAM	P04083	P04083	ANXA1	Annexin A1
NaN	NaN	28.9826	27.9067	NaN	NaN	NaN	NaN	9	1049.58	0.0078506	156.51	AEKLITQTF	Q9Y266	Q9Y266	NUDC	Nuclear migration protein nudC
NaN	NaN	23.8255	23.1582	NaN	NaN	NaN	NaN	11	1159.62	5.28e-05	175.91	AEKLLGPGVNY	P40763;P40763-2;P40763-3	P40763	STAT3	Signal transducer and activator of transcription 3
NaN	NaN	NaN	NaN	NaN	NaN	NaN	NaN	9	1040.66	0.0086805	131.03	AEKLLKNLI	Q8ND71	Q8ND71	GIMAP8	GTPase IMAP family member 8
NaN	NaN	NaN	NaN	NaN	NaN	NaN	NaN	9	884.497	0.041101	88.177	AEKLPGATV	O15040;O15040-2	O15040	TECPR2	Tectonin beta-propeller repeat-containing protein 2
NaN	NaN	NaN	NaN	NaN	NaN	NaN	NaN	9	1056.63	0.012358	120.99	AEKLQRITV	Q15050	Q15050	RRS1	Ribosome biogenesis regulatory protein homolog
21.8624	NaN	NaN	NaN	NaN	NaN	NaN	NaN	9	1088.65	0.072064	62.546	AEKLRRLGF	A6NDG6	A6NDG6	PGP	Phosphoglycolate phosphatase
26.0486	25.2855	NaN	NaN	NaN	NaN	NaN	NaN	9	969.597	0.0011862	150.24	AEKLRVAAL	Q96G91	Q96G91	P2RY11	P2Y purinoceptor 11
NaN	NaN	23.9819	23.0135	NaN	NaN	NaN	NaN	9	1002.56	0.009026	126.52	AEKLTSELI	P20591;P20591-2	P20591	MX1	Interferon-induced GTP-binding protein Mx1;Interferon-induced GTP-binding protein Mx1, N-terminally processed
21.6532	23.971	NaN	NaN	NaN	NaN	NaN	NaN	8	870.517	0.041669	125.01	AEKLVQAL	Q5VU43;Q5VU43-3;Q5VU43-4;Q5VU43-6;Q5VU43-7;Q5VU43-2	Q5VU43	PDE4DIP	Myomegalin
NaN	NaN	24.4678	NaN	NaN	NaN	NaN	NaN	12	1482.83	0.076054	78.548	AEKNERVQRQLL	P15311	P15311	EZR	Ezrin
NaN	NaN	NaN	NaN	NaN	NaN	NaN	NaN	9	1021.54	0.022659	102.51	AEKNFLTTV	Q99549;Q99549-2	Q99549	MPHOSPH8	M-phase phosphoprotein 8
NaN	NaN	NaN	NaN	NaN	NaN	NaN	NaN	9	977.518	0.052728	98.418	AEKNGLSFI	P62491	P62491	RAB11A	Ras-related protein Rab-11A
NaN	NaN	NaN	NaN	NaN	NaN	NaN	NaN	9	970.581	0.011719	117.4	AEKNGLVKI	P08195;P08195-3;P08195-2;P08195-4	P08195	SLC3A2	4F2 cell-surface antigen heavy chain
NaN	NaN	NaN	NaN	NaN	NaN	NaN	NaN	10	1088.54	0.04987	102.07	AEKNLGESEI	Q15008;Q15008-4;Q15008-3;Q15008-2	Q15008	PSMD6	26S proteasome non-ATPase regulatory subunit 6
NaN	NaN	24.9898	24.4152	NaN	NaN	NaN	NaN	10	1172.54	0.0022967	154.12	AEKNTTFDTF	Q14562	Q14562	DHX8	ATP-dependent RNA helicase DHX8
NaN	NaN	NaN	NaN	NaN	NaN	NaN	NaN	9	896.533	0.07071	75.109	AEKPVGALL	Q9Y232-2;Q9Y232;Q9Y232-4	Q9Y232-2	CDYL	Chromodomain Y-like protein
NaN	NaN	NaN	NaN	NaN	NaN	NaN	NaN	9	1014.5	0.029587	96.492	AEKQPSQEV	Q09472	Q09472	EP300	Histone acetyltransferase p300
NaN	NaN	NaN	23.3455	NaN	NaN	NaN	NaN	10	1273.62	0.0023416	136.32	AEKQQSHQRY	O14879	O14879	IFIT3	Interferon-induced protein with tetratricopeptide repeats 3
NaN	NaN	NaN	NaN	NaN	NaN	NaN	NaN	9	1001.5	0.030503	95.815	AEKSEQPTL	Q8IWA0	Q8IWA0	WDR75	WD repeat-containing protein 75
NaN	NaN	NaN	NaN	NaN	NaN	NaN	NaN	9	985.544	0.0092839	123.16	AEKSPLQTI	Q9HAD4	Q9HAD4	WDR41	WD repeat-containing protein 41
NaN	NaN	NaN	NaN	NaN	NaN	NaN	NaN	17	2028.09	0.0043175	95.767	AEKTEVLSEDLLQIERR	Q68EM7;Q68EM7-6;Q68EM7-5;Q68EM7-2;Q68EM7-4	Q68EM7	ARHGAP17	Rho GTPase-activating protein 17
NaN	NaN	NaN	NaN	NaN	NaN	NaN	NaN	9	999.571	0.024981	113.18	AEKVDAVRI	P46736;P46736-2;P46736-3;P46736-5	P46736	BRCC3	Lys-63-specific deubiquitinase BRCC36
23.0964	NaN	NaN	NaN	NaN	NaN	NaN	NaN	8	890.523	0.068072	98.523	AEKVFAKV	Q01432;Q01432-5;Q01432-4;Q01432-3;Q01432-2	Q01432	AMPD3	AMP deaminase 3
NaN	NaN	23.2794	NaN	NaN	NaN	NaN	NaN	10	1060.56	0.079449	78.113	AEKVPAVANY	Q9H2P0	Q9H2P0	ADNP	Activity-dependent neuroprotector homeobox protein
NaN	NaN	NaN	NaN	NaN	NaN	NaN	NaN	9	924.528	0.059419	79.116	AELAAPQLI	Q13127;Q13127-4;Q13127-2;Q13127-3	Q13127	REST	RE1-silencing transcription factor
NaN	NaN	25.644	NaN	NaN	NaN	NaN	NaN	8	920.508	0.084782	91.626	AELAARKY	Q13098;Q13098-5;Q13098-7;Q13098-6	Q13098	GPS1	COP9 signalosome complex subunit 1
NaN	NaN	NaN	NaN	NaN	NaN	NaN	NaN	9	1052.53	0.057298	80.165	AELAEHREV	Q8NAN2;Q8NAN2-2	Q8NAN2	FAM73A	Protein FAM73A
NaN	NaN	24.9206	21.1481	NaN	NaN	NaN	NaN	10	1068.67	0.028034	107.9	AELAGVIKRL	P63096;P63096-2	P63096	GNAI1	Guanine nucleotide-binding protein G(i) subunit alpha-1
NaN	NaN	27.2453	25.5609	NaN	NaN	NaN	NaN	9	1062.61	0.0071793	126.67	AELALQKKY	Q15007	Q15007	WTAP	Pre-mRNA-splicing regulator WTAP
NaN	NaN	NaN	NaN	NaN	NaN	NaN	NaN	9	911.508	0.11053	64.757	AELANPKAV	Q9BPW9-2;Q9BPW9-3;Q9BPW9;Q9BPW9-4	Q9BPW9-2	DHRS9	Dehydrogenase/reductase SDR family member 9
NaN	NaN	20.4156	22.6934	NaN	NaN	NaN	NaN	9	1055.49	0.1453	69.998	AELASQQYF	Q13402;Q13402-8;Q13402-2;Q13402-7;Q13402-6;Q13402-5	Q13402	MYO7A	Unconventional myosin-VIIa
NaN	NaN	NaN	NaN	NaN	NaN	NaN	NaN	9	899.46	0.050325	83.614	AELATPEGI	O15460;O15460-2	O15460	P4HA2	Prolyl 4-hydroxylase subunit alpha-2
NaN	NaN	NaN	NaN	NaN	NaN	NaN	NaN	8	843.481	0.02397	133.6	AELATRAL	P14923	P14923	JUP	Junction plakoglobin
NaN	NaN	23.5342	NaN	NaN	NaN	NaN	NaN	12	1272.67	0.00071669	110.93	AELDGKSAKQNL	P15924;P15924-3;P15924-2	P15924	DSP	Desmoplakin
NaN	NaN	23.789	23.3487	NaN	NaN	NaN	NaN	9	970.497	0.028772	101.64	AELDIPQSV	O96005;O96005-4;O96005-3	O96005	CLPTM1	Cleft lip and palate transmembrane protein 1
NaN	NaN	NaN	NaN	NaN	NaN	NaN	NaN	10	1115.58	0.013323	111.82	AELDISNNKI	P98161;P98161-2;P98161-3	P98161	PKD1	Polycystin-1
NaN	NaN	NaN	NaN	NaN	NaN	NaN	NaN	9	974.528	0.054312	81.642	AELDKLTSV	P49454	P49454	CENPF	Centromere protein F
NaN	NaN	26.0767	NaN	NaN	NaN	NaN	NaN	9	1064.55	0.0090923	147.24	AELDKTNKF	Q9UNA1;Q9UNA1-2	Q9UNA1	ARHGAP26	Rho GTPase-activating protein 26
NaN	NaN	19.8962	19.3203	NaN	NaN	NaN	NaN	15	1584.78	0.038685	94.309	AELDPNQPASAIVNF	Q9HBL0	Q9HBL0	TNS1	Tensin-1
NaN	NaN	32.1132	27.7064	NaN	NaN	NaN	NaN	10	1205.64	0.00044845	171.33	AELDRQIKSF	Q13813;Q13813-3;Q13813-2	Q13813	SPTAN1	Spectrin alpha chain, non-erythrocytic 1
NaN	NaN	21.6972	NaN	NaN	NaN	NaN	NaN	9	1014.57	0.083465	71.379	AELEALRTL	Q92805	Q92805	GOLGA1	Golgin subfamily A member 1
NaN	NaN	23.9028	NaN	NaN	NaN	NaN	NaN	9	1128.59	0.027817	85.676	AELEDRRQL	Q9NQG5	Q9NQG5	RPRD1B	Regulation of nuclear pre-mRNA domain-containing protein 1B
NaN	NaN	24.3106	NaN	NaN	NaN	NaN	NaN	10	1237.56	2.82e-06	199.46	AELEENQRSY	P46100;P46100-4;P46100-2;P46100-5;P46100-3	P46100	ATRX	Transcriptional regulator ATRX
NaN	NaN	24.365	NaN	NaN	NaN	NaN	NaN	9	1114.6	0.063278	76.827	AELEEQKRL	Q9P2M7	Q9P2M7	CGN	Cingulin
NaN	NaN	25.7488	NaN	NaN	NaN	NaN	NaN	10	1062.46	0.02554	121.31	AELEHGSSAY	O95502	O95502	NPTXR	Neuronal pentraxin receptor
NaN	NaN	NaN	NaN	NaN	NaN	NaN	NaN	10	1118.58	0.058724	98.233	AELEKSTQTI	Q14687;Q14687-2;Q14687-3	Q14687	GSE1	Genetic suppressor element 1
NaN	NaN	27.4563	26.4627	NaN	NaN	NaN	NaN	9	1070.6	0.0047206	167.33	AELELQKQL	O43290	O43290	SART1	U4/U6.U5 tri-snRNP-associated protein 1
NaN	NaN	24.7008	NaN	NaN	NaN	NaN	NaN	11	1306.65	0.00020781	169.41	AELEQNLSRTF	P34913;P34913-3;P34913-2	P34913	EPHX2	Bifunctional epoxide hydrolase 2;Cytosolic epoxide hydrolase 2;Lipid-phosphate phosphatase
25.8604	24.0324	NaN	NaN	NaN	NaN	NaN	NaN	9	942.513	0.0099075	136.8	AELERAAAL	Q8NAF0	Q8NAF0	ZNF579	Zinc finger protein 579
NaN	NaN	NaN	NaN	NaN	NaN	NaN	NaN	9	1056.59	0.026605	96.668	AELERAQKI	Q96ST8;Q96ST8-2	Q96ST8	CEP89	Centrosomal protein of 89 kDa
NaN	NaN	25.8898	23.3984	NaN	NaN	NaN	NaN	10	1246.67	0.003983	135.86	AELERLNKQF	P35579;P35579-2	P35579	MYH9	Myosin-9
24.5236	25.0206	NaN	NaN	NaN	NaN	NaN	NaN	9	1013.55	0.02948	96.948	AELERNVAL	O95613;O95613-2	O95613	PCNT	Pericentrin
21.0836	NaN	NaN	NaN	NaN	NaN	NaN	NaN	9	1027.57	0.056507	80.455	AELERQAVL	A2A288;A2A288-3;A2A288-4	A2A288	ZC3H12D	Probable ribonuclease ZC3H12D
NaN	NaN	23.7143	NaN	NaN	NaN	NaN	NaN	9	1098.6	0.040865	88.294	AELERQQIL	Q8WWI1;Q8WWI1-3;Q8WWI1-2;Q8WWI1-4;Q8WWI1-5	Q8WWI1	LMO7	LIM domain only protein 7
NaN	NaN	NaN	NaN	NaN	NaN	NaN	NaN	9	1106.57	0.0092502	143.45	AELERTNKF	A1A4S6	A1A4S6	ARHGAP10	Rho GTPase-activating protein 10
NaN	NaN	25.2594	23.5053	NaN	NaN	NaN	NaN	10	1166.55	0.0027463	168.25	AELESSKEQF	P52306;P52306-4;P52306-5;P52306-2;P52306-3	P52306	RAP1GDS1	Rap1 GTPase-GDP dissociation stimulator 1
NaN	NaN	NaN	NaN	NaN	NaN	NaN	NaN	10	1241.67	0.080811	77.677	AELEVLRQRE	Q9UNS1;Q9UNS1-2	Q9UNS1	TIMELESS	Protein timeless homolog
NaN	NaN	25.58	23.3042	NaN	NaN	NaN	NaN	9	964.523	0.030503	95.815	AELGKSVVY	Q14558;Q14558-2	Q14558	PRPSAP1	Phosphoribosyl pyrophosphate synthase-associated protein 1
23.756	NaN	NaN	NaN	NaN	NaN	NaN	NaN	9	1029.56	0.08784	67.897	AELGRTERV	Q99829	Q99829	CPNE1	Copine-1
NaN	NaN	24.218	21.4043	NaN	NaN	NaN	NaN	10	1107.57	0.0092047	119.27	AELGTFPRAF	Q9NUP1	Q9NUP1	BLOC1S4	Biogenesis of lysosome-related organelles complex 1 subunit 4
NaN	NaN	NaN	NaN	NaN	NaN	NaN	NaN	10	1011.56	0.030802	102.07	AELGVPLSQV	Q86T24	Q86T24	ZBTB33	Transcriptional regulator Kaiso
NaN	NaN	NaN	NaN	NaN	NaN	NaN	NaN	9	1008.56	0.033412	99.136	AELHADLKI	P30533	P30533	LRPAP1	Alpha-2-macroglobulin receptor-associated protein
22.5569	NaN	NaN	NaN	NaN	NaN	NaN	NaN	10	1160.64	0.15381	64.04	AELHKTHRGL	O43491;O43491-4;O43491-3;O43491-2	O43491	EPB41L2	Band 4.1-like protein 2
NaN	NaN	NaN	NaN	NaN	NaN	NaN	NaN	10	1130.58	0.038113	93.701	AELHNHGIQI	P23497;P23497-2;P23497-7;P23497-6;P23497-5;P23497-3;P23497-4	P23497	SP100	Nuclear autoantigen Sp-100
NaN	NaN	NaN	NaN	NaN	NaN	NaN	NaN	9	1022.51	0.035033	92.47	AELHQNVNV	Q96QK1	Q96QK1	VPS35	Vacuolar protein sorting-associated protein 35
NaN	22.8595	NaN	NaN	NaN	NaN	NaN	NaN	8	829.455	0.10684	84.916	AELIANSL	P35232	P35232	PHB	Prohibitin
NaN	NaN	NaN	NaN	22.9686	NaN	NaN	NaN	13	1474.9	0.087309	69.602	AELIKHLKRTIPG	P42785;P42785-2	P42785	PRCP	Lysosomal Pro-X carboxypeptidase
NaN	NaN	NaN	NaN	NaN	NaN	NaN	NaN	9	1126.68	0.070356	64.711	AELIRERLK	Q8WUD4	Q8WUD4	CCDC12	Coiled-coil domain-containing protein 12
NaN	NaN	NaN	NaN	NaN	NaN	NaN	NaN	9	1126.68	0.019147	92.838	AELIRKREL	Q9NU02	Q9NU02	ANKEF1	Ankyrin repeat and EF-hand domain-containing protein 1
NaN	18.9109	NaN	NaN	NaN	NaN	NaN	NaN	9	1098.64	0.026006	99.136	AELIRQEKL	Q9H254;Q9H254-2;Q9H254-4	Q9H254	SPTBN4	Spectrin beta chain, non-erythrocytic 4
NaN	NaN	NaN	NaN	NaN	NaN	NaN	NaN	9	1068.64	0.030216	92.187	AELIRRQAL	Q9NUT2;Q9NUT2-5;Q9NUT2-4;Q9NUT2-3;Q9NUT2-2	Q9NUT2	ABCB8	ATP-binding cassette sub-family B member 8, mitochondrial
NaN	NaN	20.6151	27.3018	NaN	NaN	NaN	NaN	9	992.554	0.019868	105.57	AELISVSKF	Q86VB7	Q86VB7	CD163	Scavenger receptor cysteine-rich type 1 protein M130;Soluble CD163
NaN	NaN	NaN	NaN	NaN	NaN	NaN	NaN	10	1007.53	0.055575	85.744	AELKGSGFTV	Q93074;Q93074-3;Q93074-2	Q93074	MED12	Mediator of RNA polymerase II transcription subunit 12
NaN	NaN	25.263	22.9631	NaN	NaN	NaN	NaN	10	1233.64	0.0024945	160.11	AELKQLNQQY	Q13416	Q13416	ORC2	Origin recognition complex subunit 2
NaN	NaN	24.6699	24.4556	NaN	NaN	NaN	NaN	9	1028.59	0.003628	157.33	AELKQVQTL	Q9UPN3;Q9UPN3-4;Q9UPN3-2;Q9UPN3-3	Q9UPN3	MACF1	Microtubule-actin cross-linking factor 1, isoforms 1/2/3/5
NaN	NaN	25.338	22.1804	NaN	NaN	NaN	NaN	11	1243.66	0.0012936	140.49	AELKTSLAQHF	Q8IZ69;Q8IZ69-2	Q8IZ69	TRMT2A	tRNA (uracil-5-)-methyltransferase homolog A
NaN	NaN	NaN	23.4524	NaN	NaN	NaN	NaN	9	1048.58	0.074891	84.615	AELLAKELY	Q9H714;Q9H714-6;Q9H714-3;Q9H714-4	Q9H714	KIAA0226L	Uncharacterized protein KIAA0226-like
NaN	NaN	NaN	NaN	NaN	NaN	NaN	NaN	8	919.501	0.06346	100.75	AELLFNTI	P61160;P61160-2	P61160	ACTR2	Actin-related protein 2
24.0572	NaN	NaN	NaN	NaN	NaN	NaN	NaN	9	1026.52	0.0091397	125.04	AELLHQVSM	P43403;P43403-2;P43403-3	P43403	ZAP70	Tyrosine-protein kinase ZAP-70
NaN	NaN	21.9622	NaN	NaN	NaN	NaN	NaN	9	1075.63	0.048303	86.833	AELLKQIVY	Q16401;Q16401-2	Q16401	PSMD5	26S proteasome non-ATPase regulatory subunit 5
NaN	NaN	21.2573	NaN	NaN	NaN	NaN	NaN	10	1068.65	0.023134	121.99	AELLLVGNKL	Q6IQ22	Q6IQ22	RAB12	Ras-related protein Rab-12
NaN	NaN	NaN	NaN	NaN	NaN	NaN	NaN	9	1068.67	0.012569	130.27	AELLNLRKI	P29401;P29401-2	P29401	TKT	Transketolase
NaN	NaN	NaN	NaN	NaN	NaN	NaN	NaN	9	1041.61	0.0084091	106.6	AELLQKIEV	Q92598;Q92598-3;Q92598-4;Q92598-2	Q92598	HSPH1	Heat shock protein 105 kDa
NaN	NaN	24.8391	23.6352	NaN	NaN	NaN	NaN	9	1019.53	0.068162	75.854	AELLQVANY	O15460;O15460-2	O15460	P4HA2	Prolyl 4-hydroxylase subunit alpha-2
NaN	NaN	NaN	NaN	NaN	NaN	NaN	NaN	15	1695.94	0.0057088	109.1	AELLRALRRDLGAQD	Q9UHL4	Q9UHL4	DPP7	Dipeptidyl peptidase 2
23.3039	24.6217	NaN	NaN	NaN	NaN	NaN	NaN	9	970.581	0.013582	113.71	AELLRGLSL	Q9UKA1;Q9UKA1-2	Q9UKA1	FBXL5	F-box/LRR-repeat protein 5
23.7306	27.0141	NaN	NaN	NaN	NaN	NaN	NaN	9	1098.58	0.023695	116.37	AELLRHDFV	Q9H2K8	Q9H2K8	TAOK3	Serine/threonine-protein kinase TAO3
NaN	27.0068	NaN	NaN	NaN	NaN	NaN	NaN	9	1159.65	0.0088662	128.61	AELLRHKFF	O95747	O95747	OXSR1	Serine/threonine-protein kinase OSR1
25.7524	NaN	NaN	NaN	NaN	NaN	NaN	NaN	9	1173.67	0.079267	77.072	AELLRRRNF	Q6NZI2	Q6NZI2	PTRF	Polymerase I and transcript release factor
NaN	NaN	23.3265	NaN	NaN	NaN	NaN	NaN	9	985.592	0.0085207	133.12	AELLSGKRL	O75808;O75808-2	O75808	CAPN15	Calpain-15
NaN	NaN	23.5754	21.6898	NaN	NaN	NaN	NaN	9	985.592	0.059419	75.854	AELLSRAKV	Q02040-3	Q02040-3	AKAP17A	A-kinase anchor protein 17A
NaN	NaN	NaN	NaN	NaN	NaN	NaN	NaN	8	900.492	0.11302	83.377	AELLTNLQ	Q16620;Q16288;Q16620-6;Q16288-5;Q16288-3;Q16288-4;Q16620-4	Q16620	NTRK2;NTRK3	BDNF/NT-3 growth factors receptor;NT-3 growth factor receptor
NaN	NaN	22.4677	NaN	NaN	NaN	NaN	NaN	9	1107.57	0.037309	83.265	AELMQTLRF	Q9Y291	Q9Y291	MRPS33	28S ribosomal protein S33, mitochondrial
NaN	NaN	NaN	NaN	NaN	NaN	NaN	NaN	9	1006.49	0.040712	88.37	AELMRSMGL	Q96RS0	Q96RS0	TGS1	Trimethylguanosine synthase
NaN	NaN	NaN	NaN	NaN	NaN	NaN	NaN	9	1091.56	0.068764	78.334	AELNEFLTR	P23396;P23396-2	P23396	RPS3	40S ribosomal protein S3
NaN	NaN	23.4842	26.7868	NaN	NaN	NaN	NaN	9	949.451	0.027139	98.299	AELNGKDGF	P62993;P62993-2	P62993	GRB2	Growth factor receptor-bound protein 2
NaN	NaN	22.2172	21.5713	NaN	NaN	NaN	NaN	9	1079.57	0.0052718	134.81	AELNHQKQL	P07602;P07602-2;P07602-3	P07602	PSAP	Prosaposin;Saposin-A;Saposin-B-Val;Saposin-B;Saposin-C;Saposin-D
NaN	NaN	NaN	NaN	NaN	NaN	NaN	NaN	10	1157.6	0.013026	131.06	AELNLRSNEL	P13489	P13489	RNH1	Ribonuclease inhibitor
NaN	NaN	23.4315	NaN	NaN	NaN	NaN	NaN	11	1248.73	0.055557	86.624	AELNPRAPRLL	Q16619;Q16619-2	Q16619	CTF1	Cardiotrophin-1
NaN	NaN	25.3056	NaN	NaN	NaN	NaN	NaN	13	1533.73	0.010655	100.55	AELNSTTEELHKY	O95235;O95235-2	O95235	KIF20A	Kinesin-like protein KIF20A
NaN	NaN	NaN	NaN	NaN	NaN	NaN	NaN	9	829.418	0.024617	100.37	AELPGSSAV	Q14699	Q14699	RFTN1	Raftlin
NaN	NaN	NaN	NaN	NaN	NaN	NaN	NaN	10	1131.57	0.044331	72.643	AELQCEVRGK	Q8NFP4;Q8NFP4-2	Q8NFP4	MDGA1	MAM domain-containing glycosylphosphatidylinositol anchor protein 1
NaN	NaN	NaN	NaN	NaN	NaN	NaN	NaN	9	1013.58	0.040712	88.37	AELQEVVKV	Q99459	Q99459	CDC5L	Cell division cycle 5-like protein
NaN	NaN	NaN	NaN	NaN	NaN	NaN	NaN	9	1032.56	0.021891	103.35	AELQFGKQI	Q8IWT3;Q8IWT3-3	Q8IWT3	CUL9	Cullin-9
NaN	NaN	NaN	NaN	NaN	NaN	NaN	NaN	9	1030.58	0.048539	84.498	AELQKMKAI	Q96J88;Q96J88-2;Q96J88-3	Q96J88	EPSTI1	Epithelial-stromal interaction protein 1
NaN	NaN	25.59	NaN	NaN	NaN	NaN	NaN	11	1218.6	0.1048	93.325	AELQPRGSNTF	Q4KMQ1;Q4KMQ1-2;Q4KMQ1-3;Q4KMQ1-4	Q4KMQ1	TPRN	Taperin
25.0863	NaN	NaN	NaN	NaN	NaN	NaN	NaN	9	1026.59	0.0013433	147.19	AELQRARAL	Q9BVJ6;Q9BVJ6-2;Q9BVJ6-3;Q5TAP6	Q5TAP6	UTP14A;UTP14C	U3 small nucleolar RNA-associated protein 14 homolog A;U3 small nucleolar RNA-associated protein 14 homolog C
NaN	NaN	NaN	NaN	NaN	NaN	NaN	NaN	9	1056.59	0.019434	93.649	AELQRELKA	Q9UBZ9;Q9UBZ9-2	Q9UBZ9	REV1	DNA repair protein REV1
25.7716	NaN	NaN	NaN	NaN	NaN	NaN	NaN	9	1072.59	0.0011896	163.69	AELQRKESL	Q9Y4G2	Q9Y4G2	PLEKHM1	Pleckstrin homology domain-containing family M member 1
NaN	23.692	NaN	NaN	NaN	NaN	NaN	NaN	9	969.561	0.079144	69.825	AELQRLVAA	Q9Y5J9	Q9Y5J9	TIMM8B	Mitochondrial import inner membrane translocase subunit Tim8 B
24.4662	18.1729	NaN	NaN	NaN	NaN	NaN	NaN	9	1069.62	0.0014489	145.13	AELQRVQKV	Q14764	Q14764	MVP	Major vault protein
NaN	NaN	29.2775	NaN	NaN	NaN	NaN	NaN	10	1135.6	0.016988	99.855	AELQSKRASF	Q15149;Q15149-4;Q15149-2;Q15149-6;Q15149-9;Q15149-7;Q15149-8;Q15149-5;Q15149-3	Q15149	PLEC	Plectin
NaN	22.0181	NaN	NaN	NaN	NaN	NaN	NaN	19	2081.04	0.095261	55.383	AELRAAGLEPVGHYEEVEL	Q9UBS0;Q9UBS0-2	Q9UBS0	RPS6KB2	Ribosomal protein S6 kinase beta-2
NaN	NaN	27.6009	22.1498	NaN	NaN	NaN	NaN	10	1212.66	0.039128	77.64	AELRAEIKHF	Q9NUQ6;Q9NUQ6-2;Q9NUQ6-4;Q9NUQ6-3	Q9NUQ6	SPATS2L	SPATS2-like protein
NaN	21.7571	NaN	NaN	NaN	NaN	NaN	NaN	10	1087.55	0.040151	92.491	AELREASEAL	Q8TF21;Q8TF21-2	Q8TF21	ANKRD24	Ankyrin repeat domain-containing protein 24
NaN	NaN	23.5334	NaN	NaN	NaN	NaN	NaN	9	1018.59	0.058018	74.269	AELRGAKKF	Q6NV74	Q6NV74	KIAA1211L	Uncharacterized protein KIAA1211-like
NaN	21.4514	NaN	NaN	NaN	NaN	NaN	NaN	8	964.545	0.079051	93.992	AELRHLNL	Q86YC3	Q86YC3	NRROS	Negative regulator of reactive oxygen species
NaN	NaN	NaN	NaN	NaN	NaN	NaN	NaN	10	1182.62	0.020631	105.52	AELRHVMTNL	P62158	P62158	CALM1	Calmodulin
24.4499	23.6746	NaN	NaN	NaN	NaN	NaN	NaN	9	1168.65	0.026691	83.647	AELRRHLQF	O94964;O94964-2;O94964-4	O94964	SOGA1	Protein SOGA1;N-terminal form;C-terminal 80 kDa form
NaN	NaN	NaN	NaN	NaN	NaN	NaN	NaN	9	1084.64	0.05719	72.789	AELRRLQSL	O94989	O94989	ARHGEF15	Rho guanine nucleotide exchange factor 15
24.2753	NaN	NaN	NaN	NaN	NaN	NaN	NaN	9	1162.56	0.05136	80.165	AELRRMQEM	Q15019;Q15019-3;Q15019-2	Q15019	2020-09-02	Septin-2
25.0656	NaN	NaN	NaN	NaN	NaN	NaN	NaN	9	1028.57	0.023383	101.54	AELRRNGTL	P31153;P31153-2	P31153	MAT2A	S-adenosylmethionine synthase isoform type-2
17.3412	NaN	NaN	NaN	NaN	NaN	NaN	NaN	9	1162.62	0.098332	57.59	AELRRRDTF	Q9BRQ6	Q9BRQ6	CHCHD6	MICOS complex subunit MIC25
21.0956	NaN	NaN	NaN	NaN	NaN	NaN	NaN	8	873.492	0.035301	130.27	AELRTATL	Q9H479	Q9H479	FN3K	Fructosamine-3-kinase
NaN	NaN	24.2217	NaN	NaN	NaN	NaN	NaN	11	1296.63	0.0029482	128.6	AELRYDLPASY	Q9NRN9	Q9NRN9	METTL5	Methyltransferase-like protein 5
NaN	NaN	NaN	NaN	NaN	NaN	NaN	NaN	9	987.499	0.081762	71.877	AELSEGQVR	P09493-3;P09493-10;P09493-4;P09493-2;P09493-8	P09493-3	TPM1	Tropomyosin alpha-1 chain
NaN	NaN	25.8892	23.9053	NaN	NaN	NaN	NaN	10	1150.59	0.00064036	168.25	AELSEQIKSF	Q5JRA6;Q5JRA6-2;Q5JRA6-4	Q5JRA6	MIA3	Melanoma inhibitory activity protein 3
NaN	NaN	22.6664	NaN	NaN	NaN	NaN	NaN	9	933.481	0.054026	81.784	AELSPVATF	P80365	P80365	HSD11B2	Corticosteroid 11-beta-dehydrogenase isozyme 2
NaN	NaN	21.7194	24.1698	NaN	NaN	NaN	NaN	9	933.481	0.013811	113.25	AELSSLPAF	Q14814;Q14814-4;Q14814-6;Q14814-3;Q14814-5;Q14814-2	Q14814	MEF2D	Myocyte-specific enhancer factor 2D
NaN	NaN	26.1171	NaN	NaN	NaN	NaN	NaN	10	1100.62	0.012327	133.12	AELTARISQL	P26038	P26038	MSN	Moesin
NaN	NaN	NaN	NaN	NaN	NaN	NaN	NaN	9	1048.58	0.020071	125.04	AELTKVFEI	O60234;P60983	O60234	GMFG;GMFB	Glia maturation factor gamma;Glia maturation factor beta
NaN	NaN	28.0987	28.1328	NaN	NaN	NaN	NaN	9	1042.51	0.0081129	136.16	AELTPHQTF	P04844;P04844-2	P04844	RPN2	Dolichyl-diphosphooligosaccharide--protein glycosyltransferase subunit 2
NaN	NaN	NaN	NaN	NaN	NaN	NaN	NaN	10	1141.58	0.0040079	135.71	AELTPHQTFV	P04844;P04844-2	P04844	RPN2	Dolichyl-diphosphooligosaccharide--protein glycosyltransferase subunit 2
23.0036	25.7844	NaN	NaN	NaN	NaN	NaN	NaN	9	949.56	0.01334	114.19	AELVHAVVL	Q9Y6P5;Q9Y6P5-2;Q9Y6P5-3	Q9Y6P5	SESN1	Sestrin-1
22.8237	NaN	NaN	NaN	NaN	NaN	NaN	NaN	9	1120.65	0.01899	101.43	AELVRHQRI	Q8WTR7	Q8WTR7	ZNF473	Zinc finger protein 473
NaN	NaN	NaN	NaN	NaN	NaN	NaN	NaN	9	1041.63	0.056573	73.985	AELVRSVRL	Q9NR45	Q9NR45	NANS	Sialic acid synthase
NaN	NaN	NaN	NaN	NaN	NaN	NaN	NaN	8	854.45	0.064839	99.919	AELVTHSV	Q9ULJ1;Q9ULJ1-3;Q9ULJ1-6;Q9ULJ1-2;Q9ULJ1-4	Q9ULJ1	ODF2L	Outer dense fiber protein 2-like
NaN	NaN	24.495	23.2525	NaN	NaN	NaN	NaN	10	1265.56	0.01281	128.69	AELYINEHDY	Q15006	Q15006	EMC2	ER membrane protein complex subunit 2
NaN	NaN	23.1415	NaN	NaN	NaN	NaN	NaN	10	1227.61	0.0016009	171.73	AELYISNKQY	Q9Y5Q9;Q9Y5Q9-2	Q9Y5Q9	GTF3C3	General transcription factor 3C polypeptide 3
NaN	NaN	24.723	NaN	NaN	NaN	NaN	NaN	10	1109.52	0.033685	96.331	AEMALRSEGF	Q96KE9;Q96KE9-2	Q96KE9	BTBD6	BTB/POZ domain-containing protein 6
NaN	NaN	27.4326	24.0764	NaN	NaN	NaN	NaN	10	1101.56	0.0002728	124.08	AEMAQNAVRL	P35222	P35222	CTNNB1	Catenin beta-1
NaN	NaN	25.1822	NaN	NaN	NaN	NaN	NaN	10	1117.56	0.015326	109.71	AEMAQNSVRL	P14923	P14923	JUP	Junction plakoglobin
NaN	NaN	26.9035	23.3712	NaN	NaN	NaN	NaN	10	1131.6	0.023134	103.55	AEMDARTILL	P46940	P46940	IQGAP1	Ras GTPase-activating-like protein IQGAP1
NaN	NaN	23.1832	21.2116	NaN	NaN	NaN	NaN	10	1265.57	0.0073322	123.21	AEMDERFQQI	Q6UWE0;Q6UWE0-2;Q6UWE0-3	Q6UWE0	LRSAM1	E3 ubiquitin-protein ligase LRSAM1
NaN	NaN	21.7686	23.1831	NaN	NaN	NaN	NaN	9	1124.48	0.032552	94.302	AEMDEVERF	O60610;O60610-2;O60610-3	O60610	DIAPH1	Protein diaphanous homolog 1
NaN	NaN	23.1268	NaN	NaN	NaN	NaN	NaN	12	1348.64	0.0036138	121.73	AEMDPTQGRVVF	Q8NEK5-2	Q8NEK5-2	ZNF548	Zinc finger protein 548
NaN	NaN	23.4535	NaN	NaN	NaN	NaN	NaN	10	1018.46	0.042592	91.041	AEMDPTTAAL	Q9H7Z6;Q9H7Z6-2	Q9H7Z6	KAT8	Histone acetyltransferase KAT8
NaN	NaN	23.5246	NaN	NaN	NaN	NaN	NaN	13	1434.56	0.0044611	120.12	AEMDSQFDSTTGF	O15155;O15155-2	O15155	BET1	BET1 homolog
NaN	NaN	24.238	NaN	NaN	NaN	NaN	NaN	10	1134.57	0.0098108	118.18	AEMDSVKRSL	P58107	P58107	EPPK1	Epiplakin
NaN	NaN	NaN	22.3447	NaN	NaN	NaN	NaN	9	1168.51	0.12474	62.546	AEMEEELRY	Q9UEU0	Q9UEU0	VTI1B	Vesicle transport through interaction with t-SNAREs homolog 1B
NaN	NaN	28.6068	26.6773	NaN	NaN	NaN	NaN	10	1392.61	0.0033241	139.88	AEMEERFYRY	Q14839;Q14839-2	Q14839	CHD4	Chromodomain-helicase-DNA-binding protein 4
NaN	NaN	NaN	NaN	NaN	NaN	NaN	NaN	10	1033.47	0.024576	102.41	AEMEGAVQSI	Q6NZI2;Q6NZI2-2	Q6NZI2	PTRF	Polymerase I and transcript release factor
NaN	NaN	24.3279	NaN	NaN	NaN	NaN	NaN	10	1180.58	0.0086348	120.31	AEMEKDLAKF	Q8TDH9;Q8TDH9-3	Q8TDH9	BLOC1S5	Biogenesis of lysosome-related organelles complex 1 subunit 5
NaN	NaN	27.1455	25.98	NaN	NaN	NaN	NaN	9	1031.53	0.00345	159.46	AEMELQAKL	Q15583;Q15583-4;Q15583-2;Q15583-3	Q15583	TGIF1	Homeobox protein TGIF1
NaN	NaN	NaN	NaN	NaN	NaN	NaN	NaN	9	1017.52	0.044832	86.332	AEMENIKAI	Q15276;Q15276-2	Q15276	RABEP1	Rab GTPase-binding effector protein 1
NaN	NaN	26.0176	NaN	NaN	NaN	NaN	NaN	9	1034.51	0.042518	87.476	AEMERTSVL	Q86XR8;Q86XR8-3;Q86XR8-2;Q86XR8-4;Q86XR8-5	Q86XR8	CEP57	Centrosomal protein of 57 kDa
NaN	NaN	23.7979	NaN	NaN	NaN	NaN	NaN	11	1275.52	0.00098112	162.31	AEMESSHQQVM	Q9H2D6;Q9H2D6-5;Q9H2D6-7;Q9H2D6-3;Q9H2D6-2	Q9H2D6	TRIOBP	TRIO and F-actin-binding protein
NaN	NaN	27.3846	NaN	NaN	NaN	NaN	NaN	10	1205.6	0.0022506	155.58	AEMETQKEKI	Q9NTJ3;Q9NTJ3-2	Q9NTJ3	SMC4	Structural maintenance of chromosomes protein 4
NaN	NaN	27.7077	22.3452	NaN	NaN	NaN	NaN	10	1240.58	0.0042804	134.05	AEMEVKRESY	Q92575	Q92575	UBXN4	UBX domain-containing protein 4
NaN	NaN	22.4549	23.6123	NaN	NaN	NaN	NaN	9	939.437	0.067546	76.035	AEMGAYVSL	P05198	P05198	EIF2S1	Eukaryotic translation initiation factor 2 subunit 1
NaN	NaN	26.1075	NaN	NaN	NaN	NaN	NaN	10	1037.49	0.049286	87.754	AEMGLATQAF	O15027;O15027-5;O15027-2;O15027-4;O15027-3	O15027	SEC16A	Protein transport protein Sec16A
NaN	NaN	24.3469	NaN	NaN	NaN	NaN	NaN	11	1216.55	0.0098835	111.06	AEMGTRTFSAF	Q9NYU1;Q9NYU1-2	Q9NYU1	UGGT2	UDP-glucose:glycoprotein glucosyltransferase 2
NaN	NaN	25.4583	22.7152	NaN	NaN	NaN	NaN	10	1062.48	0.01218	113.89	AEMGVHSVAY	Q9NWZ5;Q9NWZ5-4	Q9NWZ5	UCKL1	Uridine-cytidine kinase-like 1
NaN	NaN	24.5473	NaN	NaN	NaN	NaN	NaN	9	1074.45	0.062334	77.674	AEMHMEQSL	Q5T5P2;Q5T5P2-3;Q5T5P2-9;Q5T5P2-2;Q5T5P2-7;Q5T5P2-10;Q5T5P2-4;Q5T5P2-8;Q5T5P2-6	Q5T5P2	KIAA1217	Sickle tail protein homolog
NaN	NaN	24.2183	NaN	NaN	NaN	NaN	NaN	10	1245.65	0.090165	75.652	AEMHNILKKY	P48426;P48426-2;P78356;P78356-2	P48426	PIP4K2A;PIP4K2B	Phosphatidylinositol 5-phosphate 4-kinase type-2 alpha;Phosphatidylinositol 5-phosphate 4-kinase type-2 beta
NaN	NaN	NaN	NaN	NaN	NaN	NaN	NaN	15	1646.77	0.037986	69.721	AEMKFDHTNSLNIAG	P04114	P04114	APOB	Apolipoprotein B-100;Apolipoprotein B-48
NaN	NaN	NaN	NaN	NaN	NaN	20.7824	22.0557	16	1759.86	0.027962	72.417	AEMKFDHTNSLNIAGL	P04114	P04114	APOB	Apolipoprotein B-100;Apolipoprotein B-48
NaN	NaN	29.9809	22.3306	NaN	NaN	NaN	NaN	11	1364.71	0.0019357	153.97	AEMLERVIKNY	P43358	P43358	MAGEA4	Melanoma-associated antigen 4
NaN	NaN	28.0684	21.7364	NaN	NaN	NaN	NaN	11	1295.64	6.7e-40	239.6	AEMLESVIKNY	P43355	P43355	MAGEA1	Melanoma-associated antigen 1
27.3964	29.3117	22.7717	25.1493	NaN	NaN	NaN	NaN	9	1026.52	0.021539	103.74	AEMLHNVTL	Q9HBI0	Q9HBI0	PARVG	Gamma-parvin
NaN	NaN	25.3894	21.5851	NaN	NaN	NaN	NaN	11	1231.63	0.0095096	111.74	AEMLPGVLQQF	Q92597;Q92597-3;Q92597-2	Q92597	NDRG1	Protein NDRG1
25.9473	26.6655	25.848	24.2107	NaN	NaN	NaN	NaN	9	1052.53	0.0057818	147.51	AEMLRSISF	Q05048	Q05048	CSTF1	Cleavage stimulation factor subunit 1
NaN	NaN	23.2805	NaN	NaN	NaN	NaN	NaN	10	1248.6	0.12419	68.657	AEMNERLQKM	P28370;P28370-2	P28370	SMARCA1	Probable global transcription activator SNF2L1
NaN	NaN	23.9441	23.1935	NaN	NaN	NaN	NaN	8	874.458	0.08098	93.195	AEMNGKLI	Q9Y6Y0	Q9Y6Y0	IVNS1ABP	Influenza virus NS1A-binding protein
18.4993	NaN	NaN	NaN	NaN	NaN	NaN	NaN	9	1061.47	0.18595	53.554	AEMPFMHSL	Q9NR48;Q9NR48-2	Q9NR48	ASH1L	Histone-lysine N-methyltransferase ASH1L
NaN	NaN	24.5496	NaN	NaN	NaN	NaN	NaN	10	1158.51	0.092416	75.189	AEMPGNLQHY	P86791;P86790	P86791	CCZ1;CCZ1B	Vacuolar fusion protein CCZ1 homolog;Vacuolar fusion protein CCZ1 homolog B
NaN	NaN	23.2446	NaN	NaN	NaN	NaN	NaN	9	1079.5	0.0093391	122.44	AEMQKTIEM	Q8IXT5	Q8IXT5	RBM12B	RNA-binding protein 12B
NaN	NaN	23.304	NaN	NaN	NaN	NaN	NaN	10	1235.63	0.067377	81.972	AEMQNLKQKF	O75330;O75330-4;O75330-2;O75330-3	O75330	HMMR	Hyaluronan mediated motility receptor
NaN	NaN	25.2488	NaN	NaN	NaN	NaN	NaN	11	1323.58	0.0020493	135.71	AEMQQIEQSNF	P50542;P50542-3;P50542-4;P50542-2	P50542	PEX5	Peroxisomal targeting signal 1 receptor
NaN	NaN	22.7899	NaN	NaN	NaN	NaN	NaN	10	1208.59	0.11324	70.908	AEMQRFSDLL	Q9NS37	Q9NS37	CREBZF	CREB/ATF bZIP transcription factor
NaN	NaN	NaN	NaN	NaN	NaN	NaN	NaN	9	933.448	0.01334	114.19	AEMSTPLSV	Q13546	Q13546	RIPK1	Receptor-interacting serine/threonine-protein kinase 1
NaN	NaN	NaN	22.4548	NaN	NaN	NaN	NaN	9	996.459	0.085062	70.912	AEMSVSVQF	Q8NHM5;Q8NHM5-3	Q8NHM5	KDM2B	Lysine-specific demethylase 2B
NaN	NaN	22.903	NaN	NaN	NaN	NaN	NaN	10	1182.56	0.050684	87.308	AEMVETQKTF	Q9NQX4;Q9NQX4-2	Q9NQX4	MYO5C	Unconventional myosin-Vc
NaN	NaN	NaN	NaN	NaN	NaN	NaN	NaN	9	1022.52	0.054503	81.548	AEMVFATRV	Q562E7;Q562E7-4	Q562E7	WDR81	WD repeat-containing protein 81
25.633	NaN	NaN	NaN	NaN	NaN	NaN	NaN	8	856.411	0.010318	113.08	AEMVHTGL	Q01518;Q01518-2	Q01518	CAP1	Adenylyl cyclase-associated protein 1
27.0832	NaN	NaN	NaN	NaN	NaN	NaN	NaN	8	925.48	0.039082	127.12	AEMVRHAL	Q16864;Q16864-2	Q16864	ATP6V1F	V-type proton ATPase subunit F
28.5756	27.9603	NaN	NaN	NaN	NaN	NaN	NaN	8	957.463	0.042483	124.34	AEMYVAKF	P13639	P13639	EEF2	Elongation factor 2
NaN	NaN	NaN	28.4105	NaN	NaN	NaN	NaN	10	1227.53	0.00093435	165.26	AENAEFMRNF	P09601	P09601	HMOX1	Heme oxygenase 1
NaN	NaN	22.3608	23.2063	NaN	NaN	NaN	NaN	9	910.403	0.099128	66.799	AENAGSYSL	Q13569	Q13569	TDG	G/T mismatch-specific thymine DNA glycosylase
24.7926	NaN	25.9544	NaN	NaN	NaN	NaN	NaN	9	951.441	0.0012027	170.95	AENARSASF	Q9UQC2;Q9UQC2-2	Q9UQC2	GAB2	GRB2-associated-binding protein 2
NaN	NaN	24.9399	21.6069	NaN	NaN	NaN	NaN	11	1328.62	0.0016019	123.8	AENDEVKFKSY	Q6IE81;Q6IE81-2;Q6IE81-3	Q6IE81	JADE1	Protein Jade-1
NaN	NaN	NaN	24.3166	NaN	NaN	NaN	NaN	9	1044.49	0.010463	119.89	AENDFLHSL	Q92608	Q92608	DOCK2	Dedicator of cytokinesis protein 2
NaN	NaN	NaN	NaN	NaN	NaN	NaN	NaN	9	1099.54	0.032064	93.162	AENDFVHRI	Q9Y3T6;Q9Y3T6-3	Q9Y3T6	R3HCC1	R3H and coiled-coil domain-containing protein 1
NaN	NaN	NaN	NaN	NaN	NaN	NaN	NaN	9	1030.53	0.034166	93.111	AENDKDVKI	P22681;Q13191;Q13191-3;Q13191-2	Q13191	CBL;CBLB	E3 ubiquitin-protein ligase CBL;E3 ubiquitin-protein ligase CBL-B
NaN	NaN	NaN	NaN	NaN	NaN	NaN	NaN	10	1097.5	0.0025859	144.38	AENEEIGSHI	Q9Y490	Q9Y490	TLN1	Talin-1
NaN	NaN	NaN	NaN	NaN	NaN	NaN	NaN	10	1222.64	0.0055346	129.38	AENEKLHQRV	P49716	P49716	CEBPD	CCAAT/enhancer-binding protein delta
NaN	NaN	24.5007	23.9644	NaN	NaN	NaN	NaN	9	1066.46	0.023223	117.4	AENELNQSY	O15397	O15397	IPO8	Importin-8
NaN	NaN	27.2234	NaN	NaN	NaN	NaN	NaN	11	1305.68	0.048222	88.596	AENESKARVRF	Q9BWJ5	Q9BWJ5	SF3B5	Splicing factor 3B subunit 5
NaN	NaN	24.9127	23.8074	NaN	NaN	NaN	NaN	10	1165.49	0.0071066	123.98	AENETNEVNF	Q15369;Q15369-2	Q15369	TCEB1	Transcription elongation factor B polypeptide 1
NaN	NaN	26.1974	25.2355	NaN	NaN	NaN	NaN	9	1037.47	0.026756	116.9	AENEYQTAI	P52907;P47755	P52907	CAPZA1;CAPZA2	F-actin-capping protein subunit alpha-1;F-actin-capping protein subunit alpha-2
NaN	NaN	24.2078	24.1835	NaN	NaN	NaN	NaN	9	1028.49	0.088236	69.984	AENFAEHVL	Q9Y276	Q9Y276	BCS1L	Mitochondrial chaperone BCS1
NaN	NaN	NaN	26.5483	NaN	NaN	NaN	NaN	9	1084.53	0.025137	112.17	AENFIQHNL	P43657	P43657	LPAR6	Lysophosphatidic acid receptor 6
NaN	NaN	NaN	NaN	NaN	NaN	NaN	NaN	9	1037.47	0.048398	84.568	AENGHFHNL	Q9H116;Q9H116-4	Q9H116	GZF1	GDNF-inducible zinc finger protein 1
NaN	NaN	NaN	NaN	NaN	NaN	NaN	NaN	14	1438.78	0.015554	95.401	AENGKLVINGNPIT	P04406;P04406-2	P04406	GAPDH	Glyceraldehyde-3-phosphate dehydrogenase
NaN	NaN	NaN	NaN	NaN	NaN	NaN	NaN	16	1698.93	0.047401	66.498	AENGKLVINGNPITIF	P04406;P04406-2	P04406	GAPDH	Glyceraldehyde-3-phosphate dehydrogenase
NaN	NaN	NaN	NaN	NaN	NaN	NaN	NaN	17	1826.99	0.0018879	109.84	AENGKLVINGNPITIFQ	P04406;P04406-2	P04406	GAPDH	Glyceraldehyde-3-phosphate dehydrogenase
NaN	NaN	25.2932	26.9155	NaN	NaN	NaN	NaN	9	978.477	0.060142	93.701	AENGKSNFL	P61769	P61769	B2M	Beta-2-microglobulin;Beta-2-microglobulin form pI 5.3
NaN	NaN	27.1932	25.9257	NaN	NaN	NaN	NaN	9	971.54	0.060999	78.334	AENGLTVRL	Q12789;Q12789-3	Q12789	GTF3C1	General transcription factor 3C polypeptide 1
NaN	NaN	NaN	NaN	NaN	NaN	NaN	NaN	11	1117.6	0.099116	76.228	AENGVKTITSV	Q99541	Q99541	PLIN2	Perilipin-2
NaN	NaN	NaN	NaN	NaN	NaN	NaN	NaN	9	924.528	0.073631	74.255	AENIPAVVI	Q9Y6M5	Q9Y6M5	SLC30A1	Zinc transporter 1
NaN	NaN	27.326	22.1617	NaN	NaN	NaN	NaN	11	1275.61	0.0022157	157.99	AENIQPGEQKY	Q04637;Q04637-3;Q04637-8;Q04637-6;Q04637-7;Q04637-5;Q04637-4;Q04637-9	Q04637	EIF4G1	Eukaryotic translation initiation factor 4 gamma 1
21.5942	NaN	NaN	NaN	NaN	NaN	NaN	NaN	9	1103.54	0.010804	119.21	AENIRNKEM	Q96Q89-4;Q96Q89;Q96Q89-3;Q96Q89-2;Q96Q89-5	Q96Q89-4	KIF20B	Kinesin-like protein KIF20B
NaN	NaN	22.7051	24.3545	NaN	NaN	NaN	NaN	9	1051.52	0.044147	86.67	AENISKDLY	Q9NQ31;Q9NQ31-3;Q9NQ31-2	Q9NQ31	AKIP1	A-kinase-interacting protein 1
NaN	NaN	NaN	28.1054	NaN	NaN	NaN	NaN	9	1063.57	0.0035889	157.8	AENISRVLY	P11216;P11217;P11217-2;P06737;P06737-2	P06737	PYGB;PYGM;PYGL	Glycogen phosphorylase, brain form;Glycogen phosphorylase, muscle form;Glycogen phosphorylase, liver form
NaN	NaN	25.6386	NaN	NaN	NaN	NaN	NaN	9	1071.59	0.0068745	157.2	AENKEIQKL	O95994	O95994	AGR2	Anterior gradient protein 2 homolog
NaN	NaN	23.2446	NaN	NaN	NaN	NaN	NaN	10	1200.67	0.013524	106.62	AENKELEKKL	Q9ULJ1;Q9ULJ1-3;Q9ULJ1-6;Q9ULJ1-2;Q9ULJ1-4;Q9ULJ1-5	Q9ULJ1	ODF2L	Outer dense fiber protein 2-like
NaN	NaN	NaN	NaN	NaN	NaN	NaN	NaN	9	1009.56	0.055726	70.816	AENKLVHSI	Q9NZV5;Q9NZV5-2	Q9NZV5	SEPN1	Selenoprotein N
NaN	NaN	23.6828	NaN	NaN	NaN	NaN	NaN	10	1085.61	0.033685	96.015	AENLEAAKKL	O60716;O60716-3;O60716-4;O60716-16;O60716-15;O60716-13;O60716-11;O60716-14;O60716-12;O60716-10;O60716-8;O60716-9;O60716-7;O60716-5;O60716-6;O60716-2;O60716-22;O60716-24;O60716-23;O60716-21;O60716-19;O60716-20;O60716-18;O60716-17;O60716-32;O60716-31;O60716-29;O60716-27;O60716-30;O60716-28;O60716-26;O60716-25	O60716	CTNND1	Catenin delta-1
NaN	NaN	NaN	NaN	NaN	NaN	NaN	NaN	9	940.523	0.026194	98.997	AENLSVPVI	Q643R3	Q643R3	LPCAT4	Lysophospholipid acyltransferase LPCAT4
NaN	NaN	21.2497	27.4966	NaN	NaN	NaN	NaN	9	1092.53	0.02628	98.933	AENMIQLQF	P20592	P20592	MX2	Interferon-induced GTP-binding protein Mx2
NaN	NaN	20.6897	22.9214	NaN	NaN	NaN	NaN	9	999.524	0.079685	72.485	AENNIDLVL	Q96KA5;Q96KA5-2	Q96KA5	CLPTM1L	Cleft lip and palate transmembrane protein 1-like protein
NaN	NaN	NaN	22.4717	NaN	NaN	NaN	NaN	9	1046.54	0.14099	60.682	AENNINLIF	P18084	P18084	ITGB5	Integrin beta-5
NaN	NaN	21.5075	31.4278	NaN	NaN	NaN	NaN	9	1044.52	0.0034848	159.04	AENNIQPIF	P05107	P05107	ITGB2	Integrin beta-2
NaN	NaN	25.0662	20.5175	NaN	NaN	NaN	NaN	11	1270.7	0.036513	96.015	AENPDMLKKLL	Q7L311	Q7L311	ARMCX2	Armadillo repeat-containing X-linked protein 2
NaN	NaN	24.3805	23.274	NaN	NaN	NaN	NaN	9	926.435	0.07071	75.109	AENPDTPAL	Q9P219	Q9P219	CCDC88C	Protein Daple
NaN	NaN	NaN	NaN	NaN	NaN	NaN	NaN	9	1040.53	0.012151	116.54	AENPFLTHL	Q05655;Q05655-2	Q05655	PRKCD	Protein kinase C delta type;Protein kinase C delta type regulatory subunit;Protein kinase C delta type catalytic subunit
NaN	NaN	27.3748	27.1207	NaN	NaN	NaN	NaN	9	1004.49	0.027532	98.009	AENPGKYNI	Q00839;Q00839-2	Q00839	HNRNPU	Heterogeneous nuclear ribonucleoprotein U
NaN	NaN	25.27	NaN	NaN	NaN	NaN	NaN	10	1115.49	0.0075572	122.44	AENPHSEYGL	Q9C005	Q9C005	DPY30	Protein dpy-30 homolog
NaN	21.4729	27.3012	25.1924	NaN	NaN	NaN	NaN	9	983.529	0.0088057	129.4	AENPSIQLL	Q7Z434;Q7Z434-4	Q7Z434	MAVS	Mitochondrial antiviral-signaling protein
NaN	NaN	NaN	NaN	NaN	NaN	NaN	NaN	9	856.429	0.048801	84.368	AENPTAGVV	Q86XP3;Q86XP3-2	Q86XP3	DDX42	ATP-dependent RNA helicase DDX42
NaN	NaN	NaN	NaN	NaN	NaN	NaN	NaN	9	1021.48	0.034051	93.195	AENPVENHI	Q58WW2;Q58WW2-2;Q58WW2-4;Q58WW2-3	Q58WW2	DCAF6	DDB1- and CUL4-associated factor 6
NaN	NaN	NaN	NaN	NaN	NaN	NaN	NaN	9	1000.46	0.037127	83.364	AENQAQPML	Q14160;Q14160-3;Q14160-2	Q14160	SCRIB	Protein scribble homolog
NaN	NaN	NaN	NaN	NaN	NaN	NaN	NaN	9	941.482	0.056241	91.318	AENQGTPLL	P56559;P56559-2	P56559	ARL4C	ADP-ribosylation factor-like protein 4C
NaN	NaN	NaN	NaN	NaN	NaN	NaN	NaN	11	1153.63	0.04497	90.657	AENQGTPLLVI	P56559;P56559-2	P56559	ARL4C	ADP-ribosylation factor-like protein 4C
NaN	NaN	21.6904	23.4691	NaN	NaN	NaN	NaN	9	999.524	0.071596	69.198	AENQLALEL	Q68EM7;Q68EM7-6;Q68EM7-5;Q68EM7-2;Q68EM7-4	Q68EM7	ARHGAP17	Rho GTPase-activating protein 17
NaN	NaN	NaN	NaN	NaN	NaN	NaN	NaN	9	1000.53	0.029831	96.311	AENQRITAV	Q12996	Q12996	CSTF3	Cleavage stimulation factor subunit 3
NaN	NaN	26.3319	25.7123	NaN	NaN	NaN	NaN	9	1050.53	5.65e-07	193.41	AENQTVVKY	Q12769;Q12769-3	Q12769	NUP160	Nuclear pore complex protein Nup160
NaN	NaN	NaN	22.7709	NaN	NaN	NaN	NaN	11	1280.6	0.048222	83.998	AENRQGTLTEY	P14598;P14598-2	P14598	NCF1	Neutrophil cytosol factor 1
NaN	NaN	27.0571	NaN	NaN	NaN	NaN	NaN	9	1136.61	0.034074	93.178	AENRRLHEL	Q9BYN8	Q9BYN8	MRPS26	28S ribosomal protein S26, mitochondrial
NaN	NaN	NaN	23.9503	NaN	NaN	NaN	NaN	9	1043.47	0.086852	83.623	AENRSAFSY	Q9BYM8;Q9BYM8-3	Q9BYM8	RBCK1	RanBP-type and C3HC4-type zinc finger-containing protein 1
NaN	NaN	25.0053	NaN	NaN	NaN	NaN	NaN	10	1176.55	8.45e-05	168.26	AENSPTRQQF	Q86XP3	Q86XP3	DDX42	ATP-dependent RNA helicase DDX42
NaN	NaN	NaN	NaN	NaN	NaN	NaN	NaN	10	1159.58	9.99e-06	186.25	AENSQLTERI	Q9P2E9;Q9P2E9-3;Q9P2E9-2	Q9P2E9	RRBP1	Ribosome-binding protein 1
NaN	NaN	23.4881	24.3518	NaN	NaN	NaN	NaN	9	1049.51	0.054549	85.161	AENSRDVFI	Q5T6V5	Q5T6V5	C9orf64	UPF0553 protein C9orf64
NaN	NaN	23.981	NaN	NaN	NaN	NaN	NaN	10	1110.6	0.11109	71.349	AENSSLIKHL	Q9NXT0;Q9NXT0-3	Q9NXT0	ZNF586	Zinc finger protein 586
NaN	NaN	23.7069	NaN	NaN	NaN	NaN	NaN	9	1041.48	0.0086516	131.41	AENSYVKMT	O14617;O14617-2;O14617-5;O14617-3;O14617-4	O14617	AP3D1	AP-3 complex subunit delta-1
NaN	NaN	25.5749	26.0251	NaN	NaN	NaN	NaN	9	987.56	0.011247	118.33	AENTLSKLL	Q5T6F0	Q5T6F0	DCAF12	DDB1- and CUL4-associated factor 12
NaN	NaN	24.779	21.3891	NaN	NaN	NaN	NaN	9	937.462	0.047395	85.064	AENVAGHQI	P53804;P53804-3;P53804-2	P53804	TTC3	E3 ubiquitin-protein ligase TTC3
NaN	NaN	NaN	25.1643	NaN	NaN	NaN	NaN	9	961.487	0.039803	88.948	AENVPASKF	Q4ADV7;Q4ADV7-2;Q4ADV7-3	Q4ADV7	RIC1	RAB6A-GEF complex partner protein 1
NaN	NaN	NaN	NaN	NaN	NaN	NaN	NaN	9	997.508	0.040457	99.442	AENVPVEQI	O95786;O95786-2	O95786	DDX58	Probable ATP-dependent RNA helicase DDX58
NaN	NaN	NaN	24.9148	NaN	NaN	NaN	NaN	10	1195.53	0.12748	67.981	AENWFRTSAD	Q96KM6	Q96KM6	ZNF512B	Zinc finger protein 512B
NaN	NaN	26.0134	NaN	NaN	NaN	NaN	NaN	9	973.414	0.073083	74.415	AEPEGTHSF	Q03135;Q03135-2	Q03135	CAV1	Caveolin-1
NaN	NaN	NaN	NaN	NaN	NaN	NaN	NaN	9	1059.62	0.063158	77.318	AEPHRPLKI	Q15652;Q15652-3;Q15652-2	Q15652	JMJD1C	Probable JmjC domain-containing histone demethylation protein 2C
22.5873	NaN	NaN	NaN	NaN	NaN	NaN	NaN	8	902.486	0.092688	92.319	AEPIKQAF	Q56NI9;Q56NI9-2	Q56NI9	ESCO2	N-acetyltransferase ESCO2
NaN	NaN	NaN	NaN	NaN	NaN	NaN	NaN	9	1001.52	0.083049	71.501	AEPKAKDPF	P26641;P26641-2	P26641	EEF1G	Elongation factor 1-gamma
NaN	NaN	NaN	NaN	NaN	NaN	NaN	NaN	9	1006.58	0.067546	76.035	AEPKPKPQL	Q53T59	Q53T59	HS1BP3	HCLS1-binding protein 3
NaN	NaN	NaN	NaN	NaN	NaN	NaN	24.821	13	1524.72	0.0017491	128.68	AEPLAFTFSHDYK	P04114	P04114	APOB	Apolipoprotein B-100;Apolipoprotein B-48
NaN	NaN	NaN	NaN	NaN	NaN	21.1892	25.0193	14	1581.75	0.021253	85.45	AEPLAFTFSHDYKG	P04114	P04114	APOB	Apolipoprotein B-100;Apolipoprotein B-48
24.6632	NaN	23.5504	NaN	NaN	NaN	NaN	NaN	9	984.528	0.099133	68.422	AEPLGWLTV	Q9Y5U5-3;Q9Y5U5	Q9Y5U5-3	TNFRSF18	Tumor necrosis factor receptor superfamily member 18
NaN	NaN	23.8086	21.3028	NaN	NaN	NaN	NaN	9	1025.59	0.082396	79.116	AEPLLLQRS	Q5TAP6	Q5TAP6	UTP14C	U3 small nucleolar RNA-associated protein 14 homolog C
NaN	NaN	NaN	NaN	NaN	NaN	NaN	NaN	9	1012.56	0.03954	89.142	AEPNLKQTI	Q8NFC6	Q8NFC6	BOD1L1	Biorientation of chromosomes in cell division protein 1-like 1
19.7763	NaN	NaN	NaN	NaN	NaN	NaN	NaN	9	879.434	0.028953	97.602	AEPPPAEGL	P55884;P55884-2	P55884	EIF3B	Eukaryotic translation initiation factor 3 subunit B
NaN	NaN	NaN	NaN	NaN	NaN	NaN	NaN	9	957.513	0.040735	88.358	AEPSKLNSI	Q15392;Q15392-2	Q15392	DHCR24	Delta(24)-sterol reductase
NaN	NaN	27.4135	NaN	NaN	NaN	NaN	NaN	11	1330.69	0.019922	88.596	AEPTPEKEKRF	Q9BQI3;Q9BQI3-2	Q9BQI3	EIF2AK1	Eukaryotic translation initiation factor 2-alpha kinase 1
24.3322	22.3758	NaN	NaN	NaN	NaN	NaN	NaN	9	983.471	0.046113	94.407	AEPVPTSHF	Q9HCH0;Q9HCH0-2;Q9HCH0-3	Q9HCH0	NCKAP5L	Nck-associated protein 5-like
NaN	NaN	25.9281	NaN	NaN	NaN	NaN	NaN	10	1181.61	0.018389	107.29	AEPYGKIKNY	P43243;P43243-2	P43243	MATR3	Matrin-3
NaN	NaN	NaN	NaN	NaN	NaN	NaN	NaN	9	1066.51	0.048398	84.568	AEPYPTSRF	P24468;P24468-3;P24468-2	P24468	NR2F2	COUP transcription factor 2
NaN	NaN	26.1823	NaN	NaN	NaN	NaN	NaN	9	1135.57	0.015707	110.12	AEPYRPIQY	Q99569;Q99569-2	Q99569	PKP4	Plakophilin-4
NaN	NaN	22.6121	NaN	NaN	NaN	NaN	NaN	11	1198.67	0.0055346	115.78	AEQAAQLSRLL	Q8WV44;Q8WV44-4;Q8WV44-2	Q8WV44	TRIM41	E3 ubiquitin-protein ligase TRIM41
NaN	NaN	26.4259	NaN	NaN	NaN	NaN	NaN	11	1327.72	0.0043801	108.43	AEQALKHLKQY	Q9Y6E2	Q9Y6E2	BZW2	Basic leucine zipper and W2 domain-containing protein 2
NaN	NaN	24.4107	NaN	NaN	NaN	NaN	NaN	9	1117.57	0.024896	84.568	AEQARFFLH	O15230	O15230	LAMA5	Laminin subunit alpha-5
NaN	NaN	23.7887	NaN	NaN	NaN	NaN	NaN	9	930.502	0.053136	96.492	AEQASILSL	Q12905	Q12905	ILF2	Interleukin enhancer-binding factor 2
NaN	NaN	26.4002	27.1498	NaN	NaN	NaN	NaN	9	1083.52	0.046047	85.731	AEQDFISKF	Q9NV70;Q9NV70-2	Q9NV70	EXOC1	Exocyst complex component 1
NaN	NaN	23.7327	24.0155	NaN	NaN	NaN	NaN	9	1051.48	0.039978	88.819	AEQDIKDSF	Q8IYN0	Q8IYN0	ZNF100	Zinc finger protein 100
NaN	NaN	25.9533	25.0645	NaN	NaN	NaN	NaN	9	1101.53	0.0085121	138.98	AEQDIREEI	Q15631;Q15631-2	Q15631	TSN	Translin
NaN	NaN	28.0695	26.9367	NaN	NaN	NaN	NaN	9	1085.57	0.012038	127.4	AEQDLIREL	Q9BXC9	Q9BXC9	BBS2	Bardet-Biedl syndrome 2 protein
NaN	NaN	23.6554	23.2824	NaN	NaN	NaN	NaN	9	1015.52	0.082396	71.692	AEQDLVQTL	Q9P289;Q9P289-3;Q9P289-2	Q9P289	STK26	Serine/threonine-protein kinase 26
NaN	NaN	NaN	22.6221	NaN	NaN	NaN	NaN	9	958.461	0.061021	78.324	AEQDVPSTL	Q96RL6;Q96RL6-2	Q96RL6	SIGLEC11	Sialic acid-binding Ig-like lectin 11
23.0135	NaN	NaN	NaN	NaN	NaN	NaN	NaN	9	1016.46	0.0083599	127.46	AEQEAHYAV	Q9NUV9	Q9NUV9	GIMAP4	GTPase IMAP family member 4
NaN	NaN	28.182	22.8284	NaN	NaN	NaN	NaN	11	1320.64	0.0014297	147.91	AEQEDRALRSF	Q00341;Q00341-2	Q00341	HDLBP	Vigilin
NaN	NaN	25.2306	NaN	NaN	NaN	NaN	NaN	11	1293.62	3.64e-05	145.99	AEQEDTQKKAF	Q8WXH0;Q8WXH0-2;Q8WXH0-9;Q8WXH0-8	Q8WXH0	SYNE2	Nesprin-2
NaN	NaN	22.5921	NaN	NaN	NaN	NaN	NaN	9	1113.65	0.079685	64.04	AEQEKLKRL	Q13625;Q13625-2;Q13625-3	Q13625	TP53BP2	Apoptosis-stimulating of p53 protein 2
NaN	NaN	24.039	24.1173	NaN	NaN	NaN	NaN	9	1001.54	0.0088834	128.38	AEQEKTLAL	P32456	P32456	GBP2	Interferon-induced guanylate-binding protein 2
NaN	NaN	27.7406	NaN	NaN	NaN	NaN	NaN	11	1370.72	1.14e-29	228.84	AEQELEKQRQL	Q15149;Q15149-4;Q15149-2;Q15149-6;Q15149-9;Q15149-7;Q15149-8;Q15149-5;Q15149-3	Q15149	PLEC	Plectin
NaN	NaN	24.0286	18.6393	NaN	NaN	NaN	NaN	10	1128.61	0.018567	107.15	AEQENLGKKL	Q8WYA0;Q8WYA0-4	Q8WYA0	IFT81	Intraflagellar transport protein 81 homolog
NaN	NaN	23.7371	NaN	NaN	NaN	NaN	NaN	11	1434.72	0.0012153	130.01	AEQERDKLQRY	O95229	O95229	ZWINT	ZW10 interactor
NaN	NaN	NaN	NaN	NaN	NaN	NaN	NaN	9	1084.6	0.015534	94.309	AEQERLARL	Q9UBC2-2	Q9UBC2-2	EPS15L1	Epidermal growth factor receptor substrate 15-like 1
NaN	NaN	22.5873	NaN	NaN	NaN	NaN	NaN	9	1173.52	0.12048	51.113	AEQERQHNY	Q6P2Q9	Q6P2Q9	PRPF8	Pre-mRNA-processing-splicing factor 8
NaN	NaN	24.7214	NaN	NaN	NaN	NaN	NaN	10	1172.58	0.0027766	143.21	AEQERTAQQL	Q14980;Q14980-2;Q14980-4;Q14980-3	Q14980	NUMA1	Nuclear mitotic apparatus protein 1
NaN	NaN	30.3631	NaN	NaN	NaN	NaN	NaN	9	1030.5	0.0031955	162.49	AEQESARQL	Q15149;Q15149-4;Q15149-2;Q15149-6;Q15149-9;Q15149-7;Q15149-8;Q15149-5;Q15149-3	Q15149	PLEC	Plectin
NaN	NaN	24.4167	NaN	NaN	NaN	NaN	NaN	10	1214.56	0.010808	116.37	AEQESGLYRY	Q9NU22	Q9NU22	MDN1	Midasin
NaN	NaN	24.5315	24.6933	NaN	NaN	NaN	NaN	9	1027.57	0.010772	119.27	AEQEVARLL	Q86YV9	Q86YV9	HPS6	Hermansky-Pudlak syndrome 6 protein
22.2737	20.0044	NaN	NaN	NaN	NaN	NaN	NaN	8	978.466	0.090352	101.33	AEQEVEKF	P39748;P39748-2	P39748	FEN1	Flap endonuclease 1
NaN	NaN	25.7817	24.5153	NaN	NaN	NaN	NaN	9	1086.58	0.013624	127.56	AEQFPRQVL	Q96K17;Q96K17-2	Q96K17	BTF3L4	Transcription factor BTF3 homolog 4
NaN	NaN	25.3288	NaN	NaN	NaN	NaN	NaN	9	1132.59	0.017925	107.69	AEQFRLEQI	Q9UNN5;Q9UNN5-2	Q9UNN5	FAF1	FAS-associated factor 1
NaN	NaN	23.8772	NaN	NaN	NaN	NaN	NaN	10	1090.54	0.068703	81.548	AEQGGTPIRY	Q5THJ4;Q5THJ4-2	Q5THJ4	VPS13D	Vacuolar protein sorting-associated protein 13D
NaN	NaN	NaN	NaN	NaN	NaN	NaN	NaN	9	941.555	0.023127	102	AEQGKALLI	Q6ZT12;Q6ZT12-3;Q6ZT12-2;Q6ZT12-4	Q6ZT12	UBR3	E3 ubiquitin-protein ligase UBR3
NaN	NaN	25.8033	NaN	NaN	NaN	NaN	NaN	9	1055.51	0.054503	95.909	AEQHVTQLM	Q9NQS7;Q9NQS7-2	Q9NQS7	INCENP	Inner centromere protein
NaN	NaN	21.4709	20.8598	NaN	NaN	NaN	NaN	9	1118.54	0.095373	79.469	AEQIIFDHF	Q14997;Q14997-3;Q14997-2	Q14997	PSME4	Proteasome activator complex subunit 4
22.2738	23.9697	NaN	NaN	NaN	NaN	NaN	NaN	9	1058.55	0.0017054	140.14	AEQIRLAQM	Q14157;Q14157-3;Q14157-5;Q14157-1;Q14157-4	Q14157	UBAP2L	Ubiquitin-associated protein 2-like
NaN	NaN	NaN	NaN	NaN	NaN	NaN	NaN	9	1033.54	0.0098553	121.09	AEQKAFEVI	O43439;O43439-5;O43439-2;O43439-4	O43439	CBFA2T2	Protein CBFA2T2
NaN	NaN	27.0798	NaN	NaN	NaN	NaN	NaN	9	1007.58	0.091001	69.176	AEQKGHLLL	O15440;O15440-5	O15440	ABCC5	Multidrug resistance-associated protein 5
NaN	NaN	26.5257	24.7735	NaN	NaN	NaN	NaN	9	1057.58	0.006135	147.36	AEQKLQQTL	Q13136;Q13136-2	Q13136	PPFIA1	Liprin-alpha-1
NaN	NaN	NaN	NaN	NaN	NaN	NaN	NaN	9	1071.64	0.0085418	132.84	AEQKRLKTV	Q14444;Q14444-2	Q14444	CAPRIN1	Caprin-1
NaN	NaN	NaN	NaN	NaN	NaN	NaN	NaN	9	1160.64	0.07966	58.916	AEQKRRFNI	Q9HAP2;Q9HAP2-4;Q9HAP2-2;Q9NP71;Q9NP71-4;Q9NP71-2;Q9NP71-3;Q9NP71-6	Q9NP71	MLXIP;MLXIPL	MLX-interacting protein;Carbohydrate-responsive element-binding protein
23.133	23.6434	25.3397	23.6906	NaN	NaN	NaN	NaN	9	1079.55	0.0057096	146.81	AEQKVEYTL	Q04637;Q04637-3;Q04637-8;Q04637-6;Q04637-7;Q04637-5;Q04637-4;Q04637-9	Q04637	EIF4G1	Eukaryotic translation initiation factor 4 gamma 1
21.7114	NaN	NaN	NaN	NaN	NaN	NaN	NaN	8	936.503	0.073561	100.39	AEQLHVQL	Q5BJF6;Q5BJF6-3;Q5BJF6-9;Q5BJF6-8;Q5BJF6-5;Q5BJF6-6;Q5BJF6-10;Q5BJF6-7;Q5BJF6-2;Q5BJF6-4	Q5BJF6	ODF2	Outer dense fiber protein 2
NaN	NaN	23.3571	NaN	NaN	NaN	NaN	NaN	10	1170.64	0.082065	61.765	AEQLIKHAVY	Q92624	Q92624	APPBP2	Amyloid protein-binding protein 2
NaN	NaN	NaN	NaN	NaN	NaN	NaN	NaN	9	967.534	0.043687	97.431	AEQLPVAQI	Q92643;Q92643-2	Q92643	PIGK	GPI-anchor transamidase
NaN	NaN	24.2107	NaN	NaN	NaN	NaN	NaN	9	1104.62	0.0088601	128.69	AEQLQKLLY	Q8N2F6;Q8N2F6-2;Q8N2F6-6;Q8N2F6-4;Q8N2F6-5;Q8N2F6-3	Q8N2F6	ARMC10	Armadillo repeat-containing protein 10
17.1612	NaN	NaN	NaN	NaN	NaN	NaN	NaN	11	1241.67	0.00063195	134.84	AEQLREKAGQL	Q9BRK4	Q9BRK4	LZTS2	Leucine zipper putative tumor suppressor 2
NaN	NaN	NaN	NaN	NaN	NaN	NaN	NaN	9	1028.56	0.040712	88.37	AEQLRQTAL	O95502	O95502	NPTXR	Neuronal pentraxin receptor
NaN	NaN	NaN	NaN	NaN	NaN	NaN	NaN	9	1062.57	0.016293	110.81	AEQLYKQAL	Q7Z494;Q7Z494-2	Q7Z494	NPHP3	Nephrocystin-3
NaN	NaN	26.5087	NaN	NaN	NaN	NaN	NaN	9	1053.49	0.022659	102.51	AEQMPQHTL	Q3L8U1;Q3L8U1-2;Q3L8U1-3	Q3L8U1	CHD9	Chromodomain-helicase-DNA-binding protein 9
25.1464	24.4469	NaN	NaN	NaN	NaN	NaN	NaN	9	1058.59	0.0090184	133.86	AEQMRKIAL	Q13501;Q13501-2	Q13501	SQSTM1	Sequestosome-1
NaN	NaN	25.2815	21.4777	NaN	NaN	NaN	NaN	10	1142.49	0.077392	78.77	AEQNPTASYY	O14526;O14526-3;O14526-2	O14526	FCHO1	F-BAR domain only protein 1
NaN	NaN	23.7763	24.1532	NaN	NaN	NaN	NaN	9	1095.51	0.018289	107.29	AEQNRGQFF	Q9Y2G9;Q9Y2G9-3	Q9Y2G9	SBNO2	Protein strawberry notch homolog 2
NaN	NaN	NaN	NaN	NaN	NaN	NaN	NaN	10	1103.55	0.025813	101.43	AEQNTQITSI	Q14204	Q14204	DYNC1H1	Cytoplasmic dynein 1 heavy chain 1
NaN	NaN	23.3122	NaN	NaN	NaN	NaN	NaN	10	1133.5	0.13062	79.474	AEQPPFPEGY	Q8N0W5-3;Q8N0W5;Q8N0W5-2	Q8N0W5-3	IQCK	IQ domain-containing protein K
NaN	NaN	NaN	NaN	NaN	NaN	NaN	NaN	9	938.507	0.088188	69.998	AEQPPSIVV	O75923-11;O75923-5;O75923-2;O75923-8;O75923-7;O75923-13;O75923;O75923-10;O75923-15;O75923-3;O75923-9;O75923-14;O75923-6;O75923-12;O75923-4	O75923-11	DYSF	Dysferlin
NaN	NaN	23.7914	22.52	NaN	NaN	NaN	NaN	9	982.44	0.083592	71.342	AEQPSGFTF	Q76FK4;Q76FK4-4;Q76FK4-2	Q76FK4	NOL8	Nucleolar protein 8
NaN	NaN	23.5831	21.7768	NaN	NaN	NaN	NaN	9	953.482	0.039694	104.06	AEQPTPQAL	Q8WWM7;Q8WWM7-6;Q8WWM7-8;Q8WWM7-5;Q8WWM7-4;Q8WWM7-9;Q8WWM7-2;Q8WWM7-3	Q8WWM7	ATXN2L	Ataxin-2-like protein
NaN	NaN	NaN	NaN	NaN	NaN	NaN	NaN	10	1100.55	0.050157	87.476	AEQQKAQAEV	Q15149;Q15149-4;Q15149-2;Q15149-6;Q15149-9;Q15149-7;Q15149-8;Q15149-5;Q15149-3	Q15149	PLEC	Plectin
NaN	NaN	22.6959	NaN	NaN	NaN	NaN	NaN	11	1284.6	0.11688	73.885	AEQQSVVSQFY	Q9ULH7;Q9ULH7-4;Q9ULH7-5	Q9ULH7	MKL2	MKL/myocardin-like protein 2
NaN	NaN	25.3664	NaN	NaN	NaN	NaN	NaN	9	1094.57	0.059535	79.059	AEQRKTVTY	Q6ZVM7;Q6ZVM7-4;Q6ZVM7-2;Q6ZVM7-3;Q6ZVM7-5	Q6ZVM7	TOM1L2	TOM1-like protein 2
NaN	NaN	27.6584	NaN	NaN	NaN	NaN	NaN	11	1416.75	5.05e-06	180.67	AEQRQELLRQF	Q15149;Q15149-4;Q15149-2;Q15149-6;Q15149-9;Q15149-7;Q15149-8;Q15149-5;Q15149-3	Q15149	PLEC	Plectin
20.7111	NaN	NaN	NaN	NaN	NaN	NaN	NaN	10	1130.56	0.10697	70.256	AEQRTESTPI	Q9Y678	Q9Y678	COPG1	Coatomer subunit gamma-1
23.4333	21.3316	NaN	NaN	NaN	NaN	NaN	NaN	9	1014.55	0.0085482	132.76	AEQSRIAQL	O60336;O60336-4;O60336-2;O60336-3;O60336-6	O60336	MAPKBP1	Mitogen-activated protein kinase-binding protein 1
NaN	NaN	22.6341	NaN	NaN	NaN	NaN	NaN	11	1282.58	0.01825	106.42	AEQSSPQLYNF	Q9ULL5-3	Q9ULL5-3	PRR12	Proline-rich protein 12
NaN	NaN	26.6239	24.2462	NaN	NaN	NaN	NaN	10	1124.55	0.020575	105.57	AEQTALMAKY	Q9BYK8	Q9BYK8	HELZ2	Helicase with zinc finger domain 2
NaN	NaN	NaN	NaN	NaN	NaN	NaN	NaN	9	1035.49	0.10735	65.252	AEQTFEQAI	P30305;P30305-2;P30305-3;P30305-4	P30305	CDC25B	M-phase inducer phosphatase 2
NaN	NaN	28.1412	24.705	NaN	NaN	NaN	NaN	11	1304.67	0.0011582	157.34	AEQTLNNIKQF	Q92499;Q92499-3;Q92499-2	Q92499	DDX1	ATP-dependent RNA helicase DDX1
24.1986	25.9072	NaN	NaN	NaN	NaN	NaN	NaN	8	833.428	0.072949	96.51	AEQVIAGF	Q9UHV9	Q9UHV9	PFDN2	Prefoldin subunit 2
20.2908	NaN	NaN	NaN	NaN	NaN	NaN	NaN	9	1030.58	5.91e-07	193.1	AEQVRKSTL	Q99700;Q99700-5;Q99700-2;Q99700-4	Q99700	ATXN2	Ataxin-2
26.469	NaN	NaN	NaN	NaN	NaN	NaN	NaN	9	1087.54	0.0015222	172.23	AEQWRSAQL	P55160;P55160-2	P55160	NCKAP1L	Nck-associated protein 1-like
NaN	NaN	22.5336	NaN	NaN	NaN	NaN	NaN	10	1216.58	0.078187	78.516	AEQYDAFVKF	Q53H80	Q53H80	AKIRIN2	Akirin-2
NaN	NaN	23.5103	NaN	NaN	NaN	NaN	NaN	12	1312.59	0.056701	84.615	AEQYPGGMARAY	Q12948	Q12948	FOXC1	Forkhead box protein C1
20.3325	NaN	NaN	NaN	NaN	NaN	NaN	NaN	9	1154.56	0.15146	58.917	AEQYRKMVM	O75533	O75533	SF3B1	Splicing factor 3B subunit 1
24.1897	22.6098	NaN	NaN	NaN	NaN	NaN	NaN	9	1184.59	0.023638	104.2	AEQYRSYRL	O14929;O14929-2	O14929	HAT1	Histone acetyltransferase type B catalytic subunit
NaN	NaN	25.7751	NaN	NaN	NaN	NaN	NaN	10	1197.6	0.047361	88.37	AEQYTPKAKY	P49327	P49327	FASN	Fatty acid synthase;[Acyl-carrier-protein] S-acetyltransferase;[Acyl-carrier-protein] S-malonyltransferase;3-oxoacyl-[acyl-carrier-protein] synthase;3-oxoacyl-[acyl-carrier-protein] reductase;3-hydroxyacyl-[acyl-carrier-protein] dehydratase;Enoyl-[acyl-carrier-protein] reductase;Oleoyl-[acyl-carrier-protein] hydrolase
NaN	NaN	24.0595	NaN	NaN	NaN	NaN	NaN	11	1219.59	0.029692	80.834	AERDGKNNVAF	P35606;P35606-2	P35606	COPB2	Coatomer subunit beta
NaN	NaN	25.4298	24.743	NaN	NaN	NaN	NaN	11	1208.57	0.016971	91.584	AERDVYTGDAL	P20618	P20618	PSMB1	Proteasome subunit beta type-1
NaN	NaN	NaN	NaN	NaN	NaN	NaN	NaN	9	1103.6	0.044147	86.67	AEREFILNL	Q9BYT8	Q9BYT8	NLN	Neurolysin, mitochondrial
NaN	NaN	NaN	NaN	NaN	NaN	NaN	NaN	9	1099.6	0.0056798	148.94	AEREIVRDI	P60709;P63261;Q6S8J3;A5A3E0;P0CG38;P0CG39;P68133;P68032;P62736;P63267;P63267-2	P60709	ACTB;ACTG1;POTEE;POTEF;POTEI;POTEJ;ACTA1;ACTC1;ACTA2;ACTG2	Actin, cytoplasmic 1;Actin, cytoplasmic 1, N-terminally processed;Actin, cytoplasmic 2;Actin, cytoplasmic 2, N-terminally processed;POTE ankyrin domain family member E;POTE ankyrin domain family member F;POTE ankyrin domain family member I;POTE ankyrin domain family member J;Actin, alpha skeletal muscle;Actin, alpha cardiac muscle 1;Actin, aortic smooth muscle;Actin, gamma-enteric smooth muscle
NaN	NaN	NaN	NaN	NaN	NaN	NaN	NaN	10	1254.7	0.060366	73.781	AERELQQIRI	Q6IBS0	Q6IBS0	TWF2	Twinfilin-2
NaN	NaN	NaN	NaN	NaN	NaN	NaN	NaN	9	1170.59	0.026006	99.136	AERENFHRL	Q9H3U1;Q9H3U1-2	Q9H3U1	UNC45A	Protein unc-45 homolog A
NaN	NaN	NaN	NaN	NaN	NaN	NaN	NaN	9	1043.57	0.010328	120.15	AERERGITI	P68104;P68104-2;Q5VTE0;Q05639	P68104	EEF1A1;EEF1A1P5;EEF1A2	Elongation factor 1-alpha 1;Putative elongation factor 1-alpha-like 3;Elongation factor 1-alpha 2
NaN	NaN	NaN	NaN	23.5953	NaN	NaN	NaN	18	2066.07	0.0034333	75.55	AERGALLVFAEHRYYGKS	Q9UHL4	Q9UHL4	DPP7	Dipeptidyl peptidase 2
NaN	NaN	NaN	NaN	NaN	NaN	NaN	NaN	8	949.487	0.049257	109.36	AERIFSEV	P30260;P30260-2	P30260	CDC27	Cell division cycle protein 27 homolog
NaN	NaN	NaN	NaN	NaN	NaN	NaN	NaN	9	994.52	0.0094731	118.5	AERIGVDHV	Q7L5N1	Q7L5N1	COPS6	COP9 signalosome complex subunit 6
NaN	NaN	NaN	NaN	28.0984	26.8258	NaN	NaN	17	2226.18	0.070757	43.208	AERKLEEQQRRHREHPK	Q02818	Q02818	NUCB1	Nucleobindin-1
NaN	NaN	NaN	NaN	22.0667	NaN	NaN	NaN	15	1910.96	3.95e-59	199.58	AERKYTQEQARKEFQ	Q9H3U7;Q9H3U7-2	Q9H3U7	SMOC2	SPARC-related modular calcium-binding protein 2
NaN	NaN	NaN	NaN	21.5386	NaN	NaN	NaN	16	2039.02	0.0050404	98.507	AERKYTQEQARKEFQQ	Q9H3U7;Q9H3U7-2	Q9H3U7	SMOC2	SPARC-related modular calcium-binding protein 2
NaN	NaN	NaN	NaN	NaN	NaN	NaN	NaN	9	1118.57	0.02148	103.8	AERLFENQL	Q9HDC9;Q9HDC9-2	Q9HDC9	APMAP	Adipocyte plasma membrane-associated protein
25.4135	21.8312	NaN	NaN	NaN	NaN	NaN	NaN	8	999.546	0.0097826	163.2	AERLQREV	P06753-2;P06753-6;P06753-5;P06753-3;P06753-4	P06753-3
NaN	NaN	NaN	NaN	NaN	NaN	NaN	NaN	9	1014.61	0.053103	82.241	AERLTLLTV	Q99704;Q99704-3	Q99704	DOK1	Docking protein 1
NaN	NaN	NaN	NaN	NaN	NaN	NaN	NaN	9	1044.58	0.079144	71.501	AERLTTELI	P20592	P20592	MX2	Interferon-induced GTP-binding protein Mx2
NaN	NaN	24.0397	NaN	NaN	NaN	NaN	NaN	10	1177.62	0.1263	58.37	AERNGRIISY	P10586;P10586-2	P10586	PTPRF	Receptor-type tyrosine-protein phosphatase F
NaN	NaN	NaN	NaN	NaN	NaN	NaN	NaN	9	898.451	0.010706	119.41	AERPGEAAV	P29966	P29966	MARCKS	Myristoylated alanine-rich C-kinase substrate
NaN	NaN	NaN	NaN	NaN	NaN	NaN	NaN	9	1011.58	0.018848	105.52	AERPTVARI	Q9Y5J1	Q9Y5J1	UTP18	U3 small nucleolar RNA-associated protein 18 homolog
NaN	NaN	NaN	NaN	NaN	NaN	NaN	NaN	9	985.567	0.057821	71.349	AERSGLRVV	P35270	P35270	SPR	Sepiapterin reductase
NaN	NaN	NaN	NaN	NaN	NaN	NaN	NaN	9	1007.59	0.058213	79.713	AERVGLHKV	P11388;P11388-2;P11388-3;P11388-4	P11388	TOP2A	DNA topoisomerase 2-alpha
NaN	NaN	22.6561	NaN	NaN	NaN	NaN	NaN	10	1126.6	0.1263	57.532	AESAFSFKKL	Q99627	Q99627	COPS8	COP9 signalosome complex subunit 8
NaN	NaN	25.3757	22.4762	NaN	NaN	NaN	NaN	9	886.487	0.11819	63.565	AESAGIALR	P51788;P51788-4;P51788-5;P51788-3	P51788	CLCN2	Chloride channel protein 2
NaN	NaN	25.8715	22.7055	NaN	NaN	NaN	NaN	10	1021.52	0.013942	110.81	AESAGPLHQL	Q9NY26;Q9NY26-2	Q9NY26	SLC39A1	Zinc transporter ZIP1
NaN	NaN	24.1682	NaN	NaN	NaN	NaN	NaN	9	1008.5	0.08504	62.823	AESAHEPRL	Q02952;Q02952-3;Q02952-2	Q02952	AKAP12	A-kinase anchor protein 12
NaN	NaN	22.4053	23.4893	NaN	NaN	NaN	NaN	9	1006.53	0.054026	81.784	AESALQLLY	Q9Y490	Q9Y490	TLN1	Talin-1
NaN	NaN	NaN	NaN	NaN	NaN	NaN	NaN	9	871.429	0.037043	90.986	AESAPGEVI	Q96SB3	Q96SB3	PPP1R9B	Neurabin-2
NaN	NaN	27.9639	22.892	NaN	NaN	NaN	NaN	11	1153.56	3.64e-09	231.26	AESASEAAKKY	P51572-2;P51572	P51572-2	BCAP31	B-cell receptor-associated protein 31
NaN	23.411	NaN	NaN	NaN	NaN	NaN	NaN	8	780.365	0.059786	102.98	AESAVASF	Q92542;Q92542-2	Q92542	NCSTN	Nicastrin
NaN	NaN	27.5911	26.3884	NaN	NaN	NaN	NaN	9	973.403	0.017951	122.78	AESDFASTF	Q9UBW8	Q9UBW8	COPS7A	COP9 signalosome complex subunit 7a
NaN	NaN	26.2651	NaN	NaN	NaN	NaN	NaN	9	1076.53	0.030927	95.502	AESDIMKRQ	P05023;P05023-3;P05023-4;P13637;P50993;P13637-2;P13637-3	P05023	ATP1A1;ATP1A3;ATP1A2	Sodium/potassium-transporting ATPase subunit alpha-1;Sodium/potassium-transporting ATPase subunit alpha-3;Sodium/potassium-transporting ATPase subunit alpha-2
NaN	NaN	23.5797	NaN	NaN	NaN	NaN	NaN	9	956.518	0.038809	82.452	AESDKPVVI	Q9Y4K1	Q9Y4K1	AIM1	Absent in melanoma 1 protein
NaN	NaN	22.704	20.7717	NaN	NaN	NaN	NaN	10	1215.53	0.067964	81.784	AESDLDYIQY	Q8WVK7	Q8WVK7	SKA2	Spindle and kinetochore-associated protein 2
22.2625	NaN	NaN	NaN	NaN	NaN	NaN	NaN	8	854.413	0.096488	91.14	AESEAHLV	Q06546	Q06546	GABPA	GA-binding protein alpha chain
NaN	NaN	25.9941	NaN	NaN	NaN	NaN	NaN	9	969.429	0.02003	105.39	AESEALTSY	Q7Z404;Q7Z404-1	Q7Z404	TMC4	Transmembrane channel-like protein 4
NaN	NaN	22.6398	NaN	NaN	NaN	NaN	NaN	10	1082.52	0.017928	107.66	AESEDLAVHL	Q86X27;Q86X27-3	Q86X27	RALGPS2	Ras-specific guanine nucleotide-releasing factor RalGPS2
NaN	NaN	24.2656	NaN	NaN	NaN	NaN	NaN	11	1245.59	0.058868	116.3	AESEDLAVHLY	Q86X27;Q86X27-3	Q86X27	RALGPS2	Ras-specific guanine nucleotide-releasing factor RalGPS2
NaN	NaN	26.3306	NaN	NaN	NaN	NaN	NaN	10	1215.66	0.050714	87.298	AESEKIKKHF	Q5T3F8;Q5T3F8-3;Q5T3F8-2	Q5T3F8	TMEM63B	CSC1-like protein 2
NaN	NaN	25.8146	NaN	NaN	NaN	NaN	NaN	9	1018.53	0.0090028	126.82	AESEKSQKL	Q14980;Q14980-2;Q14980-4;Q14980-3	Q14980	NUMA1	Nuclear mitotic apparatus protein 1
NaN	NaN	25.6232	NaN	NaN	NaN	NaN	NaN	9	1045.53	0.0074689	153.73	AESELQKEL	Q9BVM2	Q9BVM2	DPCD	Protein DPCD
NaN	NaN	NaN	NaN	NaN	NaN	NaN	NaN	8	920.508	0.10214	86.086	AESFRKAL	Q99996-3;Q99996-2;Q99996-6;Q99996;Q99996-5;O95613;O95613-2	Q99996-3	AKAP9;PCNT	A-kinase anchor protein 9;Pericentrin
NaN	NaN	23.4979	NaN	NaN	NaN	NaN	NaN	9	943.57	0.12457	62.573	AESGIIKVK	Q7Z3U7;Q7Z3U7-2;Q7Z3U7-6;Q7Z3U7-5	Q7Z3U7	MON2	Protein MON2 homolog
NaN	NaN	NaN	NaN	NaN	NaN	NaN	NaN	10	944.481	0.0094145	118.89	AESGPASLTI	P36956;P36956-3;P36956-2;P36956-4	P36956	SREBF1	Sterol regulatory element-binding protein 1;Processed sterol regulatory element-binding protein 1
NaN	NaN	25.4555	NaN	NaN	NaN	NaN	NaN	9	1028.57	0.039233	74.301	AESGRQRLL	Q9H427	Q9H427	KCNK15	Potassium channel subfamily K member 15
NaN	NaN	26.5358	21.3001	NaN	NaN	NaN	NaN	9	993.586	0.037043	90.986	AESHIILVL	Q13454;Q13454-2	Q13454	TUSC3	Tumor suppressor candidate 3
NaN	NaN	22.118	25.4753	NaN	NaN	NaN	NaN	9	1031.53	0.020203	105.2	AESHLSLLY	P55899	P55899	FCGRT	IgG receptor FcRn large subunit p51
NaN	NaN	NaN	NaN	NaN	NaN	NaN	NaN	9	940.425	0.0043034	153.73	AESHPSSNL	Q10567;Q10567-3;Q10567-2;Q10567-4	Q10567	AP1B1	AP-1 complex subunit beta-1
NaN	NaN	NaN	22.6541	NaN	NaN	NaN	NaN	9	1061.6	0.10872	56.729	AESIAFRRL	Q13459;Q13459-2	Q13459	MYO9B	Unconventional myosin-IXb
NaN	NaN	24.93	NaN	NaN	NaN	NaN	NaN	9	1084.67	0.058707	67.897	AESIIKRRI	O95503	O95503	CBX6	Chromobox protein homolog 6
NaN	NaN	22.2374	NaN	NaN	NaN	NaN	NaN	9	915.491	0.037043	90.986	AESIISPSL	Q8TCN5;Q8TCN5-2	Q8TCN5	ZNF507	Zinc finger protein 507
NaN	NaN	25.6761	NaN	NaN	NaN	NaN	NaN	9	949.476	0.028083	97.602	AESIPTVSF	Q8WXI7	Q8WXI7	MUC16	Mucin-16
NaN	NaN	NaN	NaN	NaN	NaN	NaN	NaN	9	980.518	0.055012	81.296	AESITFKSV	Q7Z6E9;Q7Z6E9-2	Q7Z6E9	RBBP6	E3 ubiquitin-protein ligase RBBP6
NaN	NaN	29.4085	27.3834	NaN	NaN	NaN	NaN	9	1017.51	1.59e-17	216.01	AESIVVHTY	P55060;P55060-4;P55060-3	P55060	CSE1L	Exportin-2
NaN	NaN	28.3035	NaN	NaN	NaN	NaN	NaN	10	1150.6	0.0048843	131.62	AESKEIVRGY	Q9NRX4;Q9NRX4-2	Q9NRX4	PHPT1	14 kDa phosphohistidine phosphatase
NaN	NaN	24.7222	NaN	NaN	NaN	NaN	NaN	9	1086.56	0.014574	111.74	AESKLIYTY	Q9NQX4;Q9NQX4-2	Q9NQX4	MYO5C	Unconventional myosin-Vc
NaN	NaN	22.205	NaN	NaN	NaN	NaN	NaN	9	998.587	0.079685	64.04	AESKPKRAI	Q9P2D3;Q9P2D3-3	Q9P2D3	HEATR5B	HEAT repeat-containing protein 5B
22.1189	NaN	NaN	NaN	NaN	NaN	NaN	NaN	8	837.423	0.077127	98.458	AESKSFAV	P49748-3;P49748	P49748-3	ACADVL	Very long-chain specific acyl-CoA dehydrogenase, mitochondrial
25.0129	26.7282	NaN	NaN	NaN	NaN	NaN	NaN	8	923.46	0.038534	127.56	AESKTIEF	P49792	P49792	RANBP2	E3 SUMO-protein ligase RanBP2
27.7887	23.4588	NaN	NaN	NaN	NaN	NaN	NaN	8	955.501	0.045751	111.82	AESKVFYL	P63104;P63104-2	P63104	YWHAZ	14-3-3 protein zeta/delta
NaN	NaN	NaN	NaN	NaN	NaN	NaN	NaN	9	888.492	0.052674	82.452	AESKVSVAV	Q99590;Q99590-2	Q99590	SCAF11	Protein SCAF11
NaN	NaN	NaN	24.835	NaN	NaN	NaN	NaN	9	952.498	0.034095	111.04	AESLAVHNI	P04839	P04839	CYBB	Cytochrome b-245 heavy chain
NaN	NaN	NaN	NaN	NaN	NaN	21.0887	NaN	15	1706.85	0.17426	48.177	AESLFREALSNKVDE	P43358	P43358	MAGEA4	Melanoma-associated antigen 4
NaN	NaN	NaN	NaN	NaN	NaN	20.4132	NaN	16	1819.93	0.37903	32.815	AESLFREALSNKVDEL	P43358	P43358	MAGEA4	Melanoma-associated antigen 4
NaN	NaN	NaN	NaN	NaN	NaN	NaN	NaN	9	996.56	0.033954	93.267	AESLHKTIV	P21359;P21359-2;P21359-6;P21359-4	P21359	NF1	Neurofibromin;Neurofibromin truncated
21.9784	NaN	NaN	NaN	NaN	NaN	NaN	NaN	8	868.465	0.091485	92.692	AESLHSLL	O15169;O15169-2	O15169	AXIN1	Axin-1
NaN	NaN	27.9867	27.3107	NaN	NaN	NaN	NaN	9	971.602	0.0075929	139.97	AESLIAKKI	P78371;P78371-2	P78371	CCT2	T-complex protein 1 subunit beta
23.7442	22.0048	NaN	NaN	NaN	NaN	NaN	NaN	8	923.46	0.066223	104.37	AESLKETF	P53621;P53621-2	P53621	COPA	Coatomer subunit alpha;Xenin;Proxenin
23.1418	NaN	NaN	NaN	NaN	NaN	NaN	NaN	8	922.512	0.043874	136.27	AESLKTKF	Q6ZNA1	Q6ZNA1	ZNF836	Zinc finger protein 836
NaN	NaN	NaN	NaN	NaN	NaN	NaN	NaN	9	923.496	0.0023949	168.74	AESLPPPTL	Q5I0X4	Q5I0X4	C6orf226	Uncharacterized protein C6orf226
NaN	NaN	NaN	NaN	NaN	NaN	NaN	NaN	9	958.534	0.046988	85.265	AESLQLVTV	Q9H3H5;Q9H3H5-3;Q9H3H5-2	Q9H3H5	DPAGT1	UDP-N-acetylglucosamine--dolichyl-phosphate N-acetylglucosaminephosphotransferase
NaN	NaN	25.8781	23.835	NaN	NaN	NaN	NaN	9	991.497	0.027139	98.299	AESLQPKGY	Q6ZRS2;Q6ZRS2-3;Q6ZRS2-2	Q6ZRS2	SRCAP	Helicase SRCAP
21.273	NaN	NaN	NaN	NaN	NaN	NaN	NaN	9	1111.53	0.0015206	143.73	AESLRENFF	O00443	O00443	PIK3C2A	Phosphatidylinositol 4-phosphate 3-kinase C2 domain-containing subunit alpha
NaN	NaN	22.3592	23.4404	NaN	NaN	NaN	NaN	9	1075.53	0.01334	114.19	AESLREPQF	Q5THJ4;Q5THJ4-2	Q5THJ4	VPS13D	Vacuolar protein sorting-associated protein 13D
17.0444	23.4283	NaN	NaN	NaN	NaN	NaN	NaN	9	1019.54	0.025089	110.41	AESLRGLQF	Q6ZNR0;Q6ZNR0-4;Q6ZNR0-3;Q6ZNR0-5;Q6ZNR0-2	Q6ZNR0	TMEM91	Transmembrane protein 91
20.9712	NaN	NaN	NaN	NaN	NaN	NaN	NaN	8	875.471	0.030016	134.81	AESLRTSL	Q9NVX7;Q9NVX7-2	Q9NVX7	KBTBD4	Kelch repeat and BTB domain-containing protein 4
26.5423	24.0941	NaN	NaN	NaN	NaN	NaN	NaN	8	978.55	0.034526	166.45	AESLRYKL	P23396;P23396-2	P23396	RPS3	40S ribosomal protein S3
25.6793	29.9513	27.8995	26.561	NaN	NaN	NaN	NaN	9	1091.63	0.0020506	170.3	AESLRYKLL	P23396;P23396-2	P23396	RPS3	40S ribosomal protein S3
NaN	NaN	23.3889	24.3157	NaN	NaN	NaN	NaN	9	1037.53	0.12284	56.547	AESLVHVHF	Q12770;Q12770-3	Q12770	SCAP	Sterol regulatory element-binding protein cleavage-activating protein
21.84	24.0351	NaN	NaN	NaN	NaN	NaN	NaN	8	900.503	0.059722	108.92	AESLVRNL	Q9UDY8;Q9UDY8-2	Q9UDY8	MALT1	Mucosa-associated lymphoid tissue lymphoma translocation protein 1
NaN	NaN	21.2513	21.4034	NaN	NaN	NaN	NaN	9	1126.57	0.077074	73.248	AESLYEIRF	O15321;O15321-2	O15321	TM9SF1	Transmembrane 9 superfamily member 1
NaN	NaN	NaN	24.0476	NaN	NaN	NaN	NaN	9	1110.55	0.095088	57.859	AESNHERRL	Q9Y485	Q9Y485	DMXL1	DmX-like protein 1
NaN	NaN	24.0341	NaN	NaN	NaN	NaN	NaN	9	997.519	0.10066	56.013	AESNHIKLS	O43707;O43707-2;O43707-3	O43707	ACTN4	Alpha-actinin-4
NaN	NaN	23.1709	NaN	NaN	NaN	NaN	NaN	10	1121.48	0.14462	65.313	AESNPTHYGF	O00623	O00623	PEX12	Peroxisome assembly protein 12
21.3116	NaN	28.7467	NaN	NaN	NaN	NaN	NaN	9	901.393	0.020821	110.63	AESPAGHSF	Q9NXE4;Q9NXE4-10;Q9NXE4-7;Q9NXE4-8;Q9NXE4-3;Q9NXE4-6;Q9NXE4-2;Q9NXE4-5;Q9NXE4-9;Q9NXE4-4	Q9NXE4	SMPD4	Sphingomyelin phosphodiesterase 4
21.5799	NaN	20.6091	26.273	NaN	NaN	NaN	NaN	9	1012.56	0.021028	109.71	AESPERVLL	Q5TEJ8;Q5TEJ8-6;Q5TEJ8-3;Q5TEJ8-5	Q5TEJ8	THEMIS2	Protein THEMIS2
NaN	NaN	NaN	NaN	NaN	NaN	NaN	NaN	9	855.434	0.026863	98.503	AESPGSPLV	O14901;O14901-2	O14901	KLF11	Krueppel-like factor 11
20.8886	21.9717	NaN	NaN	NaN	NaN	NaN	NaN	9	1112.53	0.073998	73.665	AESPPRFYF	P13612	P13612	ITGA4	Integrin alpha-4
NaN	NaN	NaN	NaN	NaN	NaN	NaN	NaN	9	949.476	0.052972	82.305	AESPSFLSL	O43639	O43639	NCK2	Cytoplasmic protein NCK2
NaN	NaN	26.4333	23.8888	NaN	NaN	NaN	NaN	9	1018.53	0.051032	83.265	AESPVFKEL	Q08357	Q08357	SLC20A2	Sodium-dependent phosphate transporter 2
NaN	NaN	26.7478	21.2001	NaN	NaN	NaN	NaN	9	1037.59	0.083592	63.673	AESQILKHL	P40261	P40261	NNMT	Nicotinamide N-methyltransferase
NaN	NaN	24.7118	NaN	NaN	NaN	NaN	NaN	10	1150.67	0.12748	67.494	AESQILKHLL	P40261	P40261	NNMT	Nicotinamide N-methyltransferase
16.7467	22.8953	NaN	23.7377	NaN	NaN	NaN	NaN	9	1076.56	0.083465	71.379	AESQRLQVF	Q93100;Q93100-2;Q93100-4;Q93100-3	Q93100	PHKB	Phosphorylase b kinase regulatory subunit beta
NaN	NaN	NaN	NaN	NaN	NaN	NaN	NaN	10	1072.56	0.01539	96.229	AESRAEAARI	Q14764	Q14764	MVP	Major vault protein
NaN	NaN	23.3332	21.5465	NaN	NaN	NaN	NaN	9	1171.58	0.072915	74.464	AESRFPRYF	O15315;O15315-5;O15315-2;O15315-1;O15315-4	O15315	RAD51B	DNA repair protein RAD51 homolog 2
22.3844	25.5306	NaN	NaN	NaN	NaN	NaN	NaN	9	1055.65	0.032552	84.213	AESRRVLLL	P07199	P07199	CENPB	Major centromere autoantigen B
NaN	NaN	NaN	NaN	NaN	NaN	NaN	NaN	9	904.45	0.035417	92.187	AESSAIQSI	Q03112;Q03112-3;Q03112-6;Q03112-4;Q03112-5	Q03112	MECOM	MDS1 and EVI1 complex locus protein EVI1
NaN	NaN	25.507	NaN	NaN	NaN	NaN	NaN	9	939.43	0.040712	88.37	AESSGQKSF	Q5QJE6	Q5QJE6	DNTTIP2	Deoxynucleotidyltransferase terminal-interacting protein 2
NaN	NaN	22.6963	25.4814	NaN	NaN	NaN	NaN	9	1035.53	0.0049455	151.5	AESSLRVQF	Q9P278;Q9P278-2	Q9P278	FNIP2	Folliculin-interacting protein 2
NaN	NaN	22.811	NaN	NaN	NaN	NaN	NaN	9	961.403	0.082318	71.715	AESSSTFSF	O95425;O95425-3;O95425-2;O95425-4	O95425	SVIL	Supervillin
NaN	NaN	NaN	NaN	NaN	NaN	NaN	NaN	9	918.477	0.043819	86.833	AESTGTVRV	A2RRP1;A2RRP1-2	A2RRP1	NBAS	Neuroblastoma-amplified sequence
NaN	NaN	NaN	NaN	NaN	NaN	NaN	NaN	9	987.56	0.068162	75.854	AESTNILKL	P51878;P51878-3;P51878-6;P51878-2;P51878-5	P51878	CASP5	Caspase-5;Caspase-5 subunit p20;Caspase-5 subunit p10
NaN	NaN	24.4214	NaN	NaN	NaN	NaN	NaN	9	960.466	0.011839	117.16	AESVGAKHY	Q9UL25	Q9UL25	RAB21	Ras-related protein Rab-21
NaN	NaN	NaN	23.5836	NaN	NaN	NaN	NaN	9	973.508	0.039233	89.369	AESVSQQIL	Q86WX3	Q86WX3	RPS19BP1	Active regulator of SIRT1
NaN	NaN	NaN	23.5759	NaN	NaN	NaN	NaN	9	1038.49	0.014469	111.95	AESVTEEKF	P42229;P42229-2;P51692	P42229	STAT5A;STAT5B	Signal transducer and activator of transcription 5A;Signal transducer and activator of transcription 5B
NaN	NaN	24.7984	22.7739	NaN	NaN	NaN	NaN	10	1064.59	0.0045276	132.84	AESVVKKTGF	Q92562	Q92562	FIG4	Polyphosphoinositide phosphatase
NaN	NaN	27.7877	22.9111	NaN	NaN	NaN	NaN	11	1288.64	1.49e-06	186.16	AESVVLEHRSY	Q9BWS9;Q9BWS9-2;Q9BWS9-3	Q9BWS9	CHID1	Chitinase domain-containing protein 1
22.1361	NaN	NaN	NaN	NaN	NaN	NaN	NaN	9	958.491	0.029976	107.66	AESVVPARM	P53602	P53602	MVD	Diphosphomevalonate decarboxylase
26.6851	20.7135	NaN	NaN	NaN	NaN	NaN	NaN	10	1032.5	0.01024	120.15	AESWGTGRAV	P36578	P36578	RPL4	60S ribosomal protein L4
24.7747	NaN	NaN	NaN	NaN	NaN	NaN	NaN	8	1017.43	0.01499	166.05	AESYHQHF	Q03169	Q03169	TNFAIP2	Tumor necrosis factor alpha-induced protein 2
NaN	NaN	26.5058	24.1728	NaN	NaN	NaN	NaN	9	1129.54	4.31e-08	199.7	AESYRIQTY	O95453;O95453-2;O95453-4;O95453-3	O95453	PARN	Poly(A)-specific ribonuclease PARN
NaN	22.6479	24.0078	24.0704	NaN	NaN	NaN	NaN	9	994.508	0.012237	116.37	AETARLTSF	P78371	P78371	CCT2	T-complex protein 1 subunit beta
NaN	NaN	NaN	NaN	NaN	NaN	NaN	NaN	9	990.539	0.012151	116.54	AETAVQLFI	P62495;P62495-2	P62495	ETF1	Eukaryotic peptide chain release factor subunit 1
NaN	NaN	23.1606	23.6106	NaN	NaN	NaN	NaN	9	1034.54	0.042859	98.299	AETDAIRFL	Q53HC9	Q53HC9	TSSC1	Protein TSSC1
NaN	NaN	26.6876	25.4532	NaN	NaN	NaN	NaN	10	1256.57	0.0050688	125.82	AETDFEKRDF	Q99615;Q99615-2	Q99615	DNAJC7	DnaJ homolog subfamily C member 7
NaN	NaN	NaN	NaN	NaN	NaN	NaN	NaN	10	1117.59	0.0092399	119.21	AETDKITLEV	P38606;P38606-2	P38606	ATP6V1A	V-type proton ATPase catalytic subunit A
NaN	NaN	26.0092	25.1458	NaN	NaN	NaN	NaN	9	1049.55	0.0089803	109.71	AETDLAKRF	P13667	P13667	PDIA4	Protein disulfide-isomerase A4
NaN	NaN	NaN	24.9676	NaN	NaN	NaN	NaN	9	1101.58	0.095088	57.859	AETDRLREI	O95382;O95382-3	O95382	MAP3K6	Mitogen-activated protein kinase kinase kinase 6
NaN	NaN	NaN	NaN	NaN	NaN	NaN	NaN	10	1134.59	0.010241	117.4	AETDVLFNKV	P54277;P54277-2;P54277-3;P54277-4	P54277	PMS1	PMS1 protein homolog 1
NaN	NaN	21.6312	23.4271	NaN	NaN	NaN	NaN	9	1084.52	0.038988	89.55	AETEGYLRF	O60568	O60568	PLOD3	Procollagen-lysine,2-oxoglutarate 5-dioxygenase 3
NaN	NaN	NaN	NaN	NaN	NaN	NaN	NaN	9	1043.56	0.0090447	126.28	AETELINRV	Q9UKW4;Q9UKW4-3;Q9UKW4-2;Q9UKW4-4	Q9UKW4	VAV3	Guanine nucleotide exchange factor VAV3
NaN	NaN	25.3212	NaN	NaN	NaN	NaN	NaN	9	1016.52	0.026194	98.997	AETEPIVKM	P60228	P60228	EIF3E	Eukaryotic translation initiation factor 3 subunit E
NaN	NaN	NaN	NaN	NaN	NaN	NaN	NaN	9	1053.55	0.011078	138.78	AETEQHIKV	Q96P48;Q96P48-1;Q96P48-7;Q96P48-2;Q96P48-4;Q96P48-3;Q96P48-5	Q96P48	ARAP1	Arf-GAP with Rho-GAP domain, ANK repeat and PH domain-containing protein 1
NaN	NaN	NaN	NaN	NaN	NaN	NaN	NaN	9	1046.51	0.056106	80.755	AETERNART	O75956	O75956	CDK2AP2	Cyclin-dependent kinase 2-associated protein 2
NaN	NaN	NaN	NaN	25.5129	NaN	21.4138	NaN	19	2160.13	2.49e-05	136.49	AETGDKVYVHLKNLASRPY	P00450	P00450	CP	Ceruloplasmin
NaN	NaN	NaN	NaN	25.9602	NaN	21.6812	NaN	20	2261.18	4.35e-50	207.43	AETGDKVYVHLKNLASRPYT	P00450	P00450	CP	Ceruloplasmin
NaN	NaN	23.9617	21.1209	NaN	NaN	NaN	NaN	9	928.559	0.032806	94.114	AETGKVVII	Q8TEM1	Q8TEM1	NUP210	Nuclear pore membrane glycoprotein 210
NaN	NaN	NaN	NaN	NaN	NaN	NaN	NaN	9	873.481	0.028802	97.071	AETGLLSAI	P10276;P10276-3;P10276-2	P10276	RARA	Retinoic acid receptor alpha
NaN	NaN	25.1723	23.2404	NaN	NaN	NaN	NaN	10	1087.49	0.0025859	144.38	AETGNLPHSY	Q86T82;Q86T82-2	Q86T82	USP37	Ubiquitin carboxyl-terminal hydrolase 37
NaN	NaN	28.6758	NaN	NaN	NaN	NaN	NaN	9	972.524	0.0093329	122.52	AETGQVQKI	Q00610;Q00610-2	Q00610	CLTC	Clathrin heavy chain 1
NaN	NaN	23.3267	NaN	NaN	NaN	NaN	NaN	14	1476.64	4.91e-05	166.16	AETGSSTDPEALHY	Q8N556;Q8N556-2	Q8N556	AFAP1	Actin filament-associated protein 1
NaN	NaN	NaN	NaN	NaN	NaN	NaN	NaN	10	1136.51	0.022097	104.37	AETHFGFETV	Q5HYK3;Q5HYK3-2	Q5HYK3	COQ5	2-methoxy-6-polyprenyl-1,4-benzoquinol methylase, mitochondrial
NaN	NaN	NaN	NaN	NaN	NaN	NaN	NaN	9	1014.57	4.79e-07	194.44	AETILKNNI	O95793-3;O95793;O95793-2	O95793-3	STAU1	Double-stranded RNA-binding protein Staufen homolog 1
NaN	NaN	NaN	NaN	NaN	NaN	NaN	NaN	9	1033.51	0.085386	64.803	AETITSHYL	P24390;P24390-2	P24390	KDELR1	ER lumen protein-retaining receptor 1
NaN	NaN	24.632	NaN	NaN	NaN	NaN	NaN	9	1047.52	0.077034	86.086	AETITTHYL	P33947;O43731;O43731-2	P33947	KDELR2;KDELR3	ER lumen protein-retaining receptor 2;ER lumen protein-retaining receptor 3
NaN	NaN	NaN	NaN	NaN	NaN	NaN	NaN	9	985.617	0.030375	95.909	AETKKVVLV	Q92625	Q92625	ANKS1A	Ankyrin repeat and SAM domain-containing protein 1A
23.3352	NaN	NaN	NaN	NaN	NaN	NaN	NaN	8	942.517	0.0075876	167.23	AETLHFLL	Q14669;Q14669-3;Q14669-4;Q14669-2	Q14669	TRIP12	E3 ubiquitin-protein ligase TRIP12
NaN	NaN	21.712	21.8437	NaN	NaN	NaN	NaN	9	1082.6	0.085823	70.69	AETLIFVKY	Q6YHU6;Q6YHU6-3;Q6YHU6-2;Q6YHU6-4	Q6YHU6	THADA	Thyroid adenoma-associated protein
NaN	NaN	NaN	NaN	NaN	NaN	NaN	NaN	9	954.575	0.015534	110.31	AETLPALKI	O43252	O43252	PAPSS1	Bifunctional 3-phosphoadenosine 5-phosphosulfate synthase 1;Sulfate adenylyltransferase;Adenylyl-sulfate kinase
NaN	NaN	NaN	NaN	NaN	NaN	NaN	NaN	9	929.507	0.010143	120.52	AETLPSLSI	O95340;O95340-2	O95340	PAPSS2	Bifunctional 3-phosphoadenosine 5-phosphosulfate synthase 2;Sulfate adenylyltransferase;Adenylyl-sulfate kinase
NaN	NaN	NaN	26.9829	NaN	NaN	NaN	NaN	9	975.524	0.0035085	179.21	AETLSKQSI	P04839	P04839	CYBB	Cytochrome b-245 heavy chain
NaN	NaN	25.3028	21.3561	NaN	NaN	NaN	NaN	13	1353.62	6.8e-30	213.81	AETNSRVSGVDGY	Q14566	Q14566	MCM6	DNA replication licensing factor MCM6
NaN	NaN	30.5109	29.716	NaN	NaN	NaN	NaN	9	1032.55	0.0085207	133.12	AETPDIKLF	P46782	P46782	RPS5	40S ribosomal protein S5;40S ribosomal protein S5, N-terminally processed
NaN	NaN	NaN	NaN	NaN	NaN	NaN	NaN	9	909.419	0.048821	84.359	AETPEGHAV	P30876	P30876	POLR2B	DNA-directed RNA polymerase II subunit RPB2
NaN	NaN	NaN	NaN	NaN	NaN	NaN	NaN	9	914.471	0.073913	87.181	AETPGAEKI	P32314	P32314	FOXN2	Forkhead box protein N2
NaN	NaN	26.3325	21.9504	NaN	NaN	NaN	NaN	9	984.56	0.058018	79.809	AETPQAKKI	Q14978;Q14978-3;Q14978-2	Q14978	NOLC1	Nucleolar and coiled-body phosphoprotein 1
23.4292	25.0317	NaN	NaN	NaN	NaN	NaN	NaN	8	981.492	0.038192	127.84	AETPVYRF	Q9Y6Q9;Q9Y6Q9-2;Q9Y6Q9-3;Q9Y6Q9-5;Q9Y6Q9-4	Q9Y6Q9	NCOA3	Nuclear receptor coactivator 3
NaN	NaN	NaN	23.5021	NaN	NaN	NaN	NaN	9	924.419	0.014943	111.01	AETQATSAF	P06400	P06400	RB1	Retinoblastoma-associated protein
NaN	NaN	NaN	NaN	NaN	NaN	NaN	NaN	9	930.513	0.042073	87.696	AETRAGLTL	Q5JPE7;Q15155;P69849;Q5JPE7-2;Q5JPE7-3	Q5JPE7	NOMO2;NOMO1;NOMO3	Nodal modulator 2;Nodal modulator 1;Nodal modulator 3
NaN	NaN	26.5623	NaN	NaN	NaN	NaN	NaN	9	1099.65	0.073939	74.165	AETRVKQRL	P15924;P15924-3;P15924-2	P15924	DSP	Desmoplakin
NaN	NaN	24.4019	20.6516	NaN	NaN	NaN	NaN	9	996.535	0.0017433	113.71	AETSLAHRL	P56524;P56524-2	P56524	HDAC4	Histone deacetylase 4
NaN	NaN	30.2624	NaN	NaN	NaN	NaN	NaN	9	1008.55	0.0086781	131.06	AETSYVKVL	P43358;P43355	P43355	MAGEA4;MAGEA1	Melanoma-associated antigen 4;Melanoma-associated antigen 1
NaN	NaN	24.0817	NaN	NaN	NaN	NaN	NaN	11	1300.66	0.033091	120.27	AETSYVKVLEY	P43355	P43355	MAGEA1	Melanoma-associated antigen 1
NaN	NaN	NaN	NaN	NaN	NaN	NaN	NaN	9	944.518	0.073474	89.369	AETTVNVLV	P46939;P46939-2;P46939-4	P46939	UTRN	Utrophin
NaN	NaN	24.9701	23.9601	NaN	NaN	NaN	NaN	9	1065.55	0.0028978	166.05	AETVQTVRY	Q8N0X7	Q8N0X7	SPG20	Spartin
NaN	NaN	27.7298	27.708	NaN	NaN	NaN	NaN	9	950.471	0.12977	72.879	AEVAAEKSF	Q9NW64;Q9NW64-2	Q9NW64	RBM22	Pre-mRNA-splicing factor RBM22
NaN	NaN	NaN	NaN	NaN	NaN	NaN	NaN	9	932.497	0.052972	82.305	AEVAGQFVI	P02786	P02786	TFRC	Transferrin receptor protein 1;Transferrin receptor protein 1, serum form
NaN	NaN	NaN	NaN	NaN	NaN	NaN	NaN	9	970.57	0.040712	88.37	AEVAKLLDL	P56192	P56192	MARS	Methionine--tRNA ligase, cytoplasmic
NaN	NaN	NaN	NaN	NaN	NaN	NaN	NaN	9	955.57	0.034903	84.568	AEVAKNLVL	P41226	P41226	UBA7	Ubiquitin-like modifier-activating enzyme 7
23.281	20.4937	NaN	NaN	NaN	NaN	NaN	NaN	9	1078.6	0.027228	98.233	AEVARRHQL	O75153	O75153	CLUH	Clustered mitochondria protein homolog
NaN	NaN	26.1798	NaN	NaN	NaN	NaN	NaN	11	971.529	0.047676	72.643	AEVASAGLAIA	P63133	P63133	ERVK-8	Endogenous retrovirus group K member 8 Pol protein;Reverse transcriptase;Ribonuclease H;Integrase
NaN	NaN	22.7097	20.2689	NaN	NaN	NaN	NaN	10	1049.55	0.041202	91.867	AEVASALRSF	Q7Z3C6;Q7Z3C6-2	Q7Z3C6	ATG9A	Autophagy-related protein 9A
NaN	NaN	NaN	NaN	NaN	NaN	NaN	NaN	9	954.55	0.03967	89.046	AEVASLPRL	Q9C0D3	Q9C0D3	ZYG11B	Protein zyg-11 homolog B
NaN	NaN	NaN	NaN	NaN	NaN	NaN	NaN	12	1336.72	0.0069976	99.522	AEVDARTLARHV	Q8N5H7;Q8N5H7-2;Q8N5H7-6;Q8N5H7-5;Q8N5H7-4;Q8N5H7-3	Q8N5H7	SH2D3C	SH2 domain-containing protein 3C
NaN	NaN	NaN	NaN	NaN	NaN	NaN	NaN	9	1002.49	0.037565	108.09	AEVDDQLTI	Q8WUM0	Q8WUM0	NUP133	Nuclear pore complex protein Nup133
NaN	NaN	NaN	NaN	NaN	NaN	NaN	NaN	9	999.571	0.0090608	141.39	AEVDKVARL	Q9UNK9	Q9UNK9	ANGEL1	Protein angel homolog 1
NaN	NaN	26.1657	20.3762	NaN	NaN	NaN	NaN	9	973.519	0.0051846	173.48	AEVDKVTGR	P63220	P63220	RPS21	40S ribosomal protein S21
NaN	NaN	25.7636	24.972	NaN	NaN	NaN	NaN	10	1120.59	0.025543	88.681	AEVDKVTGRF	P63220	P63220	RPS21	40S ribosomal protein S21
NaN	NaN	24.9695	25.6568	NaN	NaN	NaN	NaN	9	1078.53	0.0085482	132.76	AEVDLERTF	P36959	P36959	GMPR	GMP reductase 1
NaN	NaN	NaN	NaN	NaN	NaN	NaN	NaN	10	1115.58	0.039128	93.098	AEVDNSKQLI	Q8NEZ4;Q8NEZ4-3	Q8NEZ4	KMT2C	Histone-lysine N-methyltransferase 2C
NaN	NaN	NaN	NaN	NaN	NaN	NaN	NaN	9	1056.58	0.049651	83.948	AEVDRLLEI	Q8IUD2;Q8IUD2-3;Q8IUD2-5;Q8IUD2-2;O15083;Q8IUD2-4	Q8IUD2	ERC1;ERC2	ELKS/Rab6-interacting/CAST family member 1;ERC protein 2
NaN	NaN	25.3806	21.9577	NaN	NaN	NaN	NaN	10	1128.63	0.073627	79.974	AEVDTVRRAL	Q15149;Q15149-4;Q15149-2;Q15149-6;Q15149-9;Q15149-7;Q15149-8;Q15149-5;Q15149-3	Q15149	PLEC	Plectin
NaN	NaN	23.3292	NaN	NaN	NaN	NaN	NaN	10	929.482	0.1354	66.351	AEVEGAGVKA	Q8N5I2	Q8N5I2	ARRDC1	Arrestin domain-containing protein 1
NaN	NaN	NaN	NaN	NaN	NaN	NaN	NaN	9	1017.5	0.022263	102.95	AEVEKNETV	Q14966;Q14966-3;Q14966-5	Q14966	ZNF638	Zinc finger protein 638
NaN	NaN	23.914	NaN	NaN	NaN	NaN	NaN	10	1158.66	0.027874	87.298	AEVEKQSKKL	Q9UM00;Q9UM00-2	Q9UM00	TMCO1	Transmembrane and coiled-coil domain-containing protein 1
NaN	NaN	NaN	NaN	NaN	NaN	NaN	NaN	9	972.524	0.013586	113.7	AEVELASRV	Q15149;Q15149-4;Q15149-2;Q15149-6;Q15149-9;Q15149-7;Q15149-8;Q15149-5;Q15149-3	Q15149	PLEC	Plectin
NaN	NaN	NaN	23.2947	NaN	NaN	NaN	NaN	10	1142.64	0.040238	79.974	AEVELSARRL	Q8IZ83;Q8IZ83-3	Q8IZ83	ALDH16A1	Aldehyde dehydrogenase family 16 member A1
NaN	NaN	24.3623	NaN	NaN	NaN	NaN	NaN	9	949.487	0.040092	88.734	AEVEPGVHL	A2A3N6;Q99755;Q99755-4;Q99755-3	A2A3N6	PIPSL;PIP5K1A	Putative PIP5K1A and PSMD4-like protein;Phosphatidylinositol 4-phosphate 5-kinase type-1 alpha
NaN	NaN	NaN	NaN	NaN	NaN	NaN	NaN	9	985.544	0.021417	103.87	AEVEPSKKV	P11137;P11137-3	P11137	MAP2	Microtubule-associated protein 2
NaN	NaN	24.0867	NaN	NaN	NaN	NaN	NaN	11	1362.76	0.0016019	123.8	AEVEQKKKRTF	P62841	P62841	RPS15	40S ribosomal protein S15
NaN	NaN	23.2573	21.028	NaN	NaN	NaN	NaN	9	1143.56	0.12826	61.999	AEVEQRREQ	Q15036;Q15036-2	Q15036	SNX17	Sorting nexin-17
NaN	NaN	NaN	NaN	NaN	NaN	NaN	NaN	9	1056.57	0.014469	111.95	AEVERARQV	Q15149;Q15149-4;Q15149-2;Q15149-6;Q15149-9;Q15149-7;Q15149-8;Q15149-5;Q15149-3	Q15149	PLEC	Plectin
NaN	NaN	24.8558	NaN	NaN	NaN	NaN	NaN	9	1076.49	0.047395	85.064	AEVESYHSR	Q9UPS8;Q9UPS8-3;Q9UPS8-2	Q9UPS8	ANKRD26	Ankyrin repeat domain-containing protein 26
NaN	NaN	NaN	NaN	NaN	NaN	NaN	NaN	8	930.513	0.060226	93.374	AEVETRKV	Q9UHY1	Q9UHY1	NRBP1	Nuclear receptor-binding protein
24.0711	NaN	NaN	NaN	NaN	NaN	NaN	NaN	8	948.528	0.03004	127.12	AEVEVKKF	Q14764	Q14764	MVP	Major vault protein
NaN	NaN	26.6751	23.9474	NaN	NaN	NaN	NaN	9	1173.55	0.021453	103.83	AEVFNYREF	Q7L311	Q7L311	ARMCX2	Armadillo repeat-containing X-linked protein 2
NaN	NaN	23.3318	NaN	NaN	NaN	NaN	NaN	9	771.413	0.073083	74.415	AEVGAAAAL	Q8IYS1	Q8IYS1	PM20D2	Peptidase M20 domain-containing protein 2
NaN	NaN	NaN	NaN	NaN	NaN	NaN	NaN	10	934.424	0.0074679	122.74	AEVGDGTTSV	Q99832;Q99832-3	Q99832	CCT7	T-complex protein 1 subunit eta
NaN	NaN	NaN	NaN	NaN	NaN	NaN	NaN	9	928.487	0.094257	79.116	AEVGDQVLV	Q96DZ5	Q96DZ5	CLIP3	CAP-Gly domain-containing linker protein 3
NaN	NaN	25.7517	21.7425	NaN	NaN	NaN	NaN	11	1206.62	0.0059786	118.18	AEVGDTIRVTF	P00450;CON__ENSEMBL:ENSBTAP00000031900	P00450	CP	Ceruloplasmin
NaN	NaN	23.2826	NaN	NaN	NaN	NaN	NaN	10	1106.55	0.092302	75.213	AEVGGMQLRF	P33316;P33316-2	P33316	DUT	Deoxyuridine 5-triphosphate nucleotidohydrolase, mitochondrial
NaN	NaN	NaN	NaN	NaN	NaN	NaN	NaN	9	998.587	0.030888	95.531	AEVGKLNRI	O14901;O14901-2	O14901	KLF11	Krueppel-like factor 11
NaN	NaN	24.3549	NaN	NaN	NaN	NaN	NaN	12	1256.65	0.076156	60.598	AEVGMLPSQRVA	Q8N2C7-7;Q8N2C7-5	Q8N2C7-7	UNC80	Protein unc-80 homolog
NaN	NaN	NaN	NaN	NaN	NaN	NaN	NaN	9	913.498	0.031869	94.806	AEVGRAAQL	Q9NSC5;Q9NSC5-5;Q9NSC5-2	Q9NSC5	HOMER3	Homer protein homolog 3
NaN	NaN	NaN	NaN	NaN	NaN	NaN	NaN	9	997.628	0.095373	67.897	AEVGRKLLL	Q15916	Q15916	ZBTB6	Zinc finger and BTB domain-containing protein 6
NaN	NaN	NaN	NaN	NaN	NaN	NaN	NaN	9	969.561	0.038175	101.54	AEVGRVLQV	Q8N6R0;Q8N6R0-3;Q8N6R0-2;Q8N6R0-4	Q8N6R0	METTL13	Methyltransferase-like protein 13
NaN	NaN	NaN	NaN	NaN	NaN	NaN	NaN	9	980.565	0.023072	112.84	AEVHKAITI	Q8IZA0;Q8IZA0-2	Q8IZA0	KIAA0319L	Dyslexia-associated protein KIAA0319-like protein
NaN	NaN	23.8862	NaN	NaN	NaN	NaN	NaN	10	1183.65	0.092806	72.928	AEVHKLGQRF	O60437	O60437	PPL	Periplakin
NaN	NaN	NaN	NaN	NaN	NaN	NaN	NaN	9	1020.61	0.013809	113.26	AEVHRLVVV	P54619;P54619-2;P54619-3;Q9UGJ0;Q9UGJ0-2;Q9UGJ0-3	Q9UGJ0	PRKAG1;PRKAG2	5-AMP-activated protein kinase subunit gamma-1;5-AMP-activated protein kinase subunit gamma-2
22.4273	NaN	NaN	NaN	NaN	NaN	NaN	NaN	8	975.55	0.064837	105.12	AEVIKNRF	O94966;O94966-3;O94966-7;O94966-4;O94966-6;O94966-5	O94966	USP19	Ubiquitin carboxyl-terminal hydrolase 19
NaN	NaN	21.0348	NaN	NaN	NaN	NaN	NaN	10	1148.64	0.12046	69.423	AEVISVLQKY	P54132	P54132	BLM	Bloom syndrome protein
NaN	NaN	NaN	NaN	NaN	NaN	NaN	NaN	9	900.492	0.10738	65.246	AEVKAAAEI	Q9Y2X3	Q9Y2X3	NOP58	Nucleolar protein 58
NaN	NaN	NaN	NaN	NaN	NaN	NaN	NaN	10	1171.69	0.041736	91.549	AEVKDLTKRI	Q96BY6;Q96BY6-3;Q5JSL3	Q96BY6	DOCK10;DOCK11	Dedicator of cytokinesis protein 10;Dedicator of cytokinesis protein 11
NaN	NaN	26.5195	26.6626	NaN	NaN	NaN	NaN	9	1039.53	0.020901	104.44	AEVKGVYQF	Q9Y3Q3;Q9Y3Q3-2	Q9Y3Q3	TMED3	Transmembrane emp24 domain-containing protein 3
NaN	NaN	NaN	NaN	NaN	NaN	NaN	NaN	9	1118.64	0.055223	68.383	AEVKLLRQY	Q8IVF7;Q8IVF7-2;Q8IVF7-3	Q8IVF7	FMNL3	Formin-like protein 3
NaN	NaN	NaN	NaN	NaN	NaN	NaN	NaN	10	1129.6	0.01695	115.7	AEVKNQEVTI	P39880;P39880-6;P39880-4;P39880-5;P39880-2;P39880-3;Q13948;Q13948-9;Q13948-10;Q13948-2	P39880	CUX1	Homeobox protein cut-like 1;Protein CASP
NaN	NaN	NaN	NaN	NaN	NaN	NaN	NaN	9	1024.56	0.022039	102.46	AEVKSEIHI	Q96KE9;Q96KE9-2	Q96KE9	BTBD6	BTB/POZ domain-containing protein 6
NaN	NaN	25.8843	24.0336	NaN	NaN	NaN	NaN	10	1246.7	0.020575	94.114	AEVLDLRRLY	O95602	O95602	POLR1A	DNA-directed RNA polymerase I subunit RPA1
NaN	NaN	23.0967	NaN	NaN	NaN	NaN	NaN	9	981.513	0.0085844	132.29	AEVLEAHTI	Q9P2E3	Q9P2E3	ZNFX1	NFX1-type zinc finger-containing protein 1
20.4262	NaN	23.5058	18.7102	NaN	NaN	NaN	NaN	9	1009.56	0.06352	77.732	AEVLNKHSL	P52272;P52272-2	P52272	HNRNPM	Heterogeneous nuclear ribonucleoprotein M
NaN	NaN	NaN	NaN	NaN	NaN	NaN	NaN	9	978.55	0.074555	84.568	AEVLPSHKV	P35670;P35670-2;P35670-3;P35670-4;Q04656;Q04656-4;Q04656-5;Q04656-2;Q04656-3	P35670	ATP7B;ATP7A	Copper-transporting ATPase 2;WND/140 kDa;Copper-transporting ATPase 1
25.9065	27.4044	NaN	NaN	NaN	NaN	NaN	NaN	9	1060.56	0.0036414	147.51	AEVLRTMEL	Q9BY43;Q9BY43-2	Q9BY43	CHMP4A	Charged multivesicular body protein 4a
NaN	NaN	NaN	NaN	NaN	NaN	NaN	NaN	10	1004.51	0.038113	93.701	AEVNSSGKTI	Q9Y385	Q9Y385	UBE2J1	Ubiquitin-conjugating enzyme E2 J1
NaN	NaN	21.555	20.2361	NaN	NaN	NaN	NaN	9	915.47	0.090291	69.383	AEVPFSPGL	Q8TEM1	Q8TEM1	NUP210	Nuclear pore membrane glycoprotein 210
NaN	NaN	NaN	NaN	NaN	NaN	NaN	NaN	9	983.518	0.082121	86.833	AEVPLLDEV	Q16643;Q16643-3;Q16643-2	Q16643	DBN1	Drebrin
NaN	NaN	24.8237	NaN	NaN	NaN	NaN	NaN	10	1076.49	0.098274	74.127	AEVQAVSRCD	Q13049	Q13049	TRIM32	E3 ubiquitin-protein ligase TRIM32
NaN	NaN	NaN	NaN	NaN	NaN	NaN	NaN	9	1059.55	0.053025	82.279	AEVQHQLHV	Q6P2E9;Q6P2E9-2	Q6P2E9	EDC4	Enhancer of mRNA-decapping protein 4
NaN	NaN	NaN	NaN	NaN	NaN	NaN	NaN	9	998.576	0.010706	119.41	AEVQKLQAL	Q86UP2;Q86UP2-2;Q86UP2-3;Q86UP2-4	Q86UP2	KTN1	Kinectin
NaN	NaN	23.6265	NaN	NaN	NaN	NaN	NaN	10	1202.64	0.0087631	120.07	AEVQQVLNRF	Q6NXG1;Q6NXG1-5;Q6NXG1-4;Q6NXG1-3;Q6NXG1-2	Q6NXG1	ESRP1	Epithelial splicing regulatory protein 1
NaN	NaN	NaN	NaN	NaN	NaN	NaN	NaN	9	1082.69	0.0073995	126.07	AEVRKIIRV	P18206;P18206-2;P18206-3	P18206	VCL	Vinculin
20.8685	NaN	NaN	NaN	NaN	NaN	NaN	NaN	10	1157.63	0.18968	60.102	AEVRPRGNLF	O75592;O75592-2	O75592	MYCBP2	E3 ubiquitin-protein ligase MYCBP2
NaN	NaN	NaN	NaN	NaN	NaN	NaN	NaN	9	1025.62	0.031869	94.806	AEVRVINLI	Q9H765	Q9H765	ASB8	Ankyrin repeat and SOCS box protein 8
NaN	NaN	NaN	NaN	NaN	NaN	NaN	NaN	9	872.497	0.07071	75.109	AEVSGGLKI	P0C7T5	P0C7T5	ATXN1L	Ataxin-1-like
NaN	NaN	24.3043	NaN	NaN	NaN	NaN	NaN	11	1257.6	4.04e-09	190.02	AEVSVEHVQNF	Q96DN0	Q96DN0	ERP27	Endoplasmic reticulum resident protein 27
NaN	NaN	NaN	NaN	NaN	NaN	NaN	NaN	10	1069.6	0.091497	75.378	AEVSVPKELV	P09960;P09960-3;P09960-2;P09960-4	P09960	LTA4H	Leukotriene A-4 hydrolase
NaN	NaN	NaN	NaN	NaN	NaN	NaN	NaN	9	1009.54	0.05484	81.381	AEVTELHVI	Q63HN8-4;Q63HN8;Q63HN8-6	Q63HN8-4	RNF213	E3 ubiquitin-protein ligase RNF213
NaN	NaN	24.5806	NaN	NaN	NaN	NaN	NaN	10	1139.51	0.03082	98.033	AEVTTDDRAY	P53992;P53992-2	P53992	SEC24C	Protein transport protein Sec24C
NaN	NaN	NaN	NaN	NaN	NaN	NaN	NaN	9	975.524	0.057661	95.605	AEVTTKSQI	P13010	P13010	XRCC5	X-ray repair cross-complementing protein 5
NaN	NaN	NaN	NaN	NaN	NaN	NaN	NaN	10	1164.61	0.012327	113.62	AEVVHQLQEI	O14976;O14976-2	O14976	GAK	Cyclin-G-associated kinase
NaN	NaN	NaN	NaN	NaN	NaN	NaN	NaN	9	939.539	0.013582	129.47	AEVVKAPQV	O60832	O60832	DKC1	H/ACA ribonucleoprotein complex subunit 4
NaN	NaN	NaN	NaN	NaN	NaN	NaN	NaN	9	930.513	0.027817	97.798	AEVVVGTTR	Q5ST30;Q5ST30-3;Q5ST30-4	Q5ST30	VARS2	Valine--tRNA ligase, mitochondrial
NaN	NaN	NaN	NaN	NaN	NaN	NaN	NaN	9	1032.51	0.041401	88.029	AEVWSEITV	A1XBS5-5	A1XBS5-5
NaN	NaN	NaN	NaN	24.7779	21.8999	NaN	NaN	14	1719.92	0.046109	66.004	AEVYVVPWEKKIYP	P01042-2;P01042;P01042-3	P01042-2	KNG1	Kininogen-1;Kininogen-1 heavy chain;T-kinin;Bradykinin;Lysyl-bradykinin;Kininogen-1 light chain;Low molecular weight growth-promoting factor
NaN	NaN	NaN	NaN	23.9559	21.8749	NaN	NaN	15	1820.97	0.0019852	119.69	AEVYVVPWEKKIYPT	P01042-2;P01042;P01042-3	P01042-2	KNG1	Kininogen-1;Kininogen-1 heavy chain;T-kinin;Bradykinin;Lysyl-bradykinin;Kininogen-1 light chain;Low molecular weight growth-promoting factor
NaN	NaN	NaN	NaN	27.8221	24.0798	NaN	NaN	17	2034.08	0.0018221	111.06	AEVYVVPWEKKIYPTVN	P01042-2;P01042;P01042-3	P01042-2	KNG1	Kininogen-1;Kininogen-1 heavy chain;T-kinin;Bradykinin;Lysyl-bradykinin;Kininogen-1 light chain;Low molecular weight growth-promoting factor
NaN	NaN	NaN	NaN	NaN	NaN	NaN	NaN	9	1122.49	0.023812	101.25	AEWQRAMTM	Q9ULM3	Q9ULM3	YEATS2	YEATS domain-containing protein 2
20.2352	NaN	NaN	NaN	NaN	NaN	NaN	NaN	15	1589.66	0.016621	78.096	AEWSDSAQGSESHSL	P13747	P13747	HLA-E	HLA class I histocompatibility antigen, alpha chain E
NaN	NaN	23.5688	21.565	NaN	NaN	NaN	NaN	11	1242.59	0.007542	135.55	AEYARVVGSEY	Q9Y6X3	Q9Y6X3	MAU2	MAU2 chromatid cohesion factor homolog
NaN	NaN	NaN	NaN	NaN	NaN	NaN	NaN	10	1214.52	0.047964	88.177	AEYDFRNDSV	P19447	P19447	ERCC3	TFIIH basal transcription factor complex helicase XPB subunit
NaN	NaN	NaN	NaN	NaN	NaN	NaN	NaN	10	1282.56	0.0034854	138.9	AEYDNFFQHL	Q7Z460;Q7Z460-3;Q7Z460-2;Q7Z460-4;Q7Z460-5	Q7Z460	CLASP1	CLIP-associating protein 1
NaN	NaN	NaN	NaN	NaN	NaN	NaN	NaN	11	1261.69	0.011483	96.143	AEYDPSKLVKL	Q13075;Q13075-2	Q13075	NAIP	Baculoviral IAP repeat-containing protein 1
NaN	NaN	23.5093	NaN	NaN	NaN	NaN	NaN	9	1089.55	0.047199	85.161	AEYDRPNLL	P49754;P49754-2;P49754-3	P49754	VPS41	Vacuolar protein sorting-associated protein 41 homolog
NaN	NaN	NaN	NaN	NaN	NaN	NaN	NaN	10	1193.59	0.050157	87.476	AEYENLTNKL	Q8N4C6;Q8N4C6-7;Q8N4C6-11;Q8N4C6-9;Q8N4C6-5;Q8N4C6-6	Q8N4C6	NIN	Ninein
NaN	NaN	24.6819	23.2287	NaN	NaN	NaN	NaN	9	1035.52	0.0078774	137.88	AEYGEIKNI	Q9Y5S9;Q9Y5S9-2	Q9Y5S9	RBM8A	RNA-binding protein 8A
NaN	NaN	NaN	NaN	NaN	NaN	NaN	NaN	9	1049.48	0.054026	81.784	AEYGHFVDI	Q6P1X5	Q6P1X5	TAF2	Transcription initiation factor TFIID subunit 2
NaN	NaN	23.196	NaN	NaN	NaN	NaN	NaN	9	1137.58	0.013038	111.95	AEYKKLHSY	O43933	O43933	PEX1	Peroxisome biogenesis factor 1
22.9687	20.9838	NaN	NaN	NaN	NaN	NaN	NaN	9	1201.58	0.014533	111.82	AEYKRYLEM	Q12874	Q12874	SF3A3	Splicing factor 3A subunit 3
NaN	NaN	NaN	24.7624	NaN	NaN	NaN	NaN	9	1084.54	0.051032	83.265	AEYLIKEGY	P48147	P48147	PREP	Prolyl endopeptidase
22.6012	NaN	NaN	NaN	NaN	NaN	NaN	NaN	8	1020.56	0.064091	114.5	AEYLREKL	Q9H3K6;Q9H3K6-2	Q9H3K6	BOLA2	BolA-like protein 2
NaN	NaN	23.698	NaN	NaN	NaN	NaN	NaN	10	1222.53	0.0057603	128.61	AEYNSDLHQF	O43683;O43683-2;O43683-3	O43683	BUB1	Mitotic checkpoint serine/threonine-protein kinase BUB1
NaN	NaN	24.3077	NaN	NaN	NaN	NaN	NaN	9	1063.56	0.064837	76.827	AEYSEPKKL	P55196;P55196-3;P55196-2;P55196-6;P55196-1;P55196-5	P55196	MLLT4	Afadin
NaN	NaN	NaN	NaN	NaN	NaN	NaN	NaN	10	1109.54	0.0088792	119.86	AEYSTKNNAL	P61009	P61009	SPCS3	Signal peptidase complex subunit 3
NaN	NaN	24.3459	NaN	NaN	NaN	NaN	NaN	9	1024.52	0.061832	77.923	AEYTGPKLF	Q5T5Y3;Q5T5Y3-3;Q5T5Y3-2	Q5T5Y3	CAMSAP1	Calmodulin-regulated spectrin-associated protein 1
NaN	NaN	22.8441	NaN	NaN	NaN	NaN	NaN	9	1114.51	0.10872	65.038	AEYYAAHKY	O75477	O75477	ERLIN1	Erlin-1
NaN	NaN	NaN	26.1372	NaN	NaN	NaN	NaN	9	1223.55	0.0092205	123.98	AEYYFQKEF	P09913	P09913	IFIT2	Interferon-induced protein with tetratricopeptide repeats 2
NaN	18.2709	NaN	NaN	NaN	NaN	NaN	NaN	9	1014.49	0.021417	103.87	AFDGHAREL	Q3MIP1	Q3MIP1	ITPRIPL2	Inositol 1,4,5-trisphosphate receptor-interacting protein-like 2
NaN	NaN	24.2684	23.6602	NaN	NaN	NaN	NaN	8	1023.55	0.017334	162.51	AFEFVKQR	P28562;Q13115;Q13115-2	P28562	DUSP1;DUSP4	Dual specificity protein phosphatase 1;Dual specificity protein phosphatase 4
NaN	NaN	NaN	NaN	NaN	NaN	NaN	NaN	10	1244.64	0.11766	69.998	AFEIKLHWMA	O75140;O75140-1;O75140-7;O75140-8;O75140-3;O75140-5;O75140-4;O75140-9	O75140	DEPDC5	DEP domain-containing protein 5
NaN	NaN	NaN	NaN	NaN	NaN	NaN	NaN	16	1817.77	7.12e-80	245.13	AFGDMTSEEFRQVMNG	P07711	P07711	CTSL	Cathepsin L1;Cathepsin L1 heavy chain;Cathepsin L1 light chain
NaN	NaN	24.7687	NaN	NaN	NaN	NaN	NaN	8	914.483	0.062515	101.33	AFHAGRTR	P43353;P43353-2	P43353	ALDH3B1	Aldehyde dehydrogenase family 3 member B1
NaN	NaN	NaN	NaN	NaN	NaN	NaN	NaN	18	2095.09	0.0010596	104.26	AFHQIAMEPFEINVPKPK	Q9UEW3	Q9UEW3	MARCO	Macrophage receptor MARCO
NaN	NaN	NaN	NaN	NaN	NaN	NaN	19.2538	12	1395.73	0.039356	114.28	AFIANLFNRYPA	P13796	P13796	LCP1	Plastin-2
NaN	NaN	NaN	NaN	NaN	NaN	NaN	NaN	9	1123.63	0.057298	80.165	AFIDRHPRL	Q96RG2;Q96RG2-4;Q96RG2-2	Q96RG2	PASK	PAS domain-containing serine/threonine-protein kinase
NaN	26.0218	NaN	NaN	NaN	NaN	NaN	NaN	9	1043.65	0.0087936	129.55	AFIKRTPVI	Q14204	Q14204	DYNC1H1	Cytoplasmic dynein 1 heavy chain 1
NaN	NaN	NaN	NaN	NaN	NaN	NaN	NaN	9	1112.6	0.016633	109.11	AFINKFVQF	Q8N201	Q8N201	INTS1	Integrator complex subunit 1
NaN	NaN	NaN	NaN	NaN	NaN	NaN	NaN	9	979.501	0.014537	111.81	AFIPAIDSF	Q15029;Q15029-2;Q15029-3	Q15029	EFTUD2	116 kDa U5 small nuclear ribonucleoprotein component
NaN	NaN	NaN	NaN	NaN	NaN	NaN	NaN	9	1069.63	0.0091066	113.91	AFIQKTHLI	Q6P3V2;Q6P3V2-2	Q6P3V2	ZNF585A	Zinc finger protein 585A
NaN	NaN	NaN	NaN	NaN	NaN	NaN	NaN	10	1123.6	0.0065285	147.19	AFIRVVGSEF	P43686;P43686-2	P43686	PSMC4	26S protease regulatory subunit 6B
NaN	NaN	NaN	NaN	NaN	NaN	NaN	NaN	11	1263.69	0.045769	90.15	AFITNIPFDVK	P52272;P52272-2	P52272	HNRNPM	Heterogeneous nuclear ribonucleoprotein M
NaN	NaN	NaN	NaN	NaN	NaN	NaN	NaN	9	1060.58	0.017124	118.07	AFLALRSHF	P78527;P78527-2	P78527	PRKDC	DNA-dependent protein kinase catalytic subunit
NaN	NaN	NaN	NaN	NaN	NaN	NaN	NaN	11	1336.71	1.16e-14	209.03	AFLDKQNQVKF	P13612	P13612	ITGA4	Integrin alpha-4
NaN	NaN	NaN	NaN	NaN	NaN	NaN	NaN	9	1011.58	0.009532	135.83	AFLKAKTSF	Q8IZQ1;Q8IZQ1-2	Q8IZQ1	WDFY3	WD repeat and FYVE domain-containing protein 3
NaN	22.6696	NaN	NaN	NaN	NaN	NaN	NaN	8	849.496	0.11302	83.377	AFLKVSSV	P46060	P46060	RANGAP1	Ran GTPase-activating protein 1
NaN	NaN	NaN	NaN	NaN	NaN	NaN	NaN	9	996.564	0.016719	109.01	AFLKVSSVF	P46060	P46060	RANGAP1	Ran GTPase-activating protein 1
NaN	NaN	NaN	NaN	NaN	NaN	NaN	NaN	11	1305.72	0.0012953	160.36	AFLPREAVTRF	O94818;O94818-2;O94818-3	O94818	NOL4	Nucleolar protein 4
NaN	NaN	NaN	NaN	NaN	NaN	NaN	NaN	9	1034.53	0.026172	104.06	AFLTGRHSF	P51689;P51689-3;P51689-2	P51689	ARSD	Arylsulfatase D
NaN	NaN	NaN	NaN	NaN	NaN	22.1666	NaN	16	1908.89	0.35367	26.729	AFMAYDRYVAICYPLN	Q8NGE0	Q8NGE0	OR10AD1	Olfactory receptor 10AD1
NaN	NaN	NaN	NaN	NaN	NaN	23.3187	23.3254	16	1866.03	0.29862	44.543	AFQLKKDQVVLLNTSY	Q66K64	Q66K64	DCAF15	DDB1- and CUL4-associated factor 15
NaN	NaN	NaN	NaN	NaN	NaN	NaN	NaN	8	774.428	0.12258	80.999	AFSLVAAP	Q96J87;Q96J87-4;Q96J87-2;Q96J87-3	Q96J87	CELF6	CUGBP Elav-like family member 6
NaN	NaN	NaN	21.1231	NaN	NaN	NaN	NaN	11	1282.64	0.010224	110.76	AFVDFLSDEIK	Q07021	Q07021	C1QBP	Complement component 1 Q subcomponent-binding protein, mitochondrial
NaN	NaN	NaN	NaN	NaN	NaN	NaN	NaN	10	1210.65	0.0022153	155.84	AFVDRLSTRF	O75122-3	O75122-3	CLASP2	CLIP-associating protein 2
NaN	NaN	NaN	NaN	NaN	NaN	NaN	NaN	14	1470.73	0.0021233	127.87	AFVGSVREGQGFAF	Q9P031	Q9P031	CCDC59	Thyroid transcription factor 1-associated protein 26
NaN	NaN	NaN	NaN	NaN	NaN	21.8362	NaN	13	1519.86	5e-40	231.2	AFVVVHRIQQIPN	Q6UX71;Q6UX71-2	Q6UX71	PLXDC2	Plexin domain-containing protein 2
NaN	NaN	NaN	NaN	NaN	NaN	NaN	NaN	14	1618.93	0.014263	98.156	AFVVVHRIQQIPNV	Q6UX71;Q6UX71-2	Q6UX71	PLXDC2	Plexin domain-containing protein 2
21.3013	NaN	NaN	NaN	NaN	NaN	NaN	NaN	9	1035.58	0.15628	58.167	AFYKAQPVI	Q9UKV8;Q9UKV8-2;Q9H9G7;Q9UL18	Q9H9G7	AGO2;AGO3;AGO1	Protein argonaute-2;Protein argonaute-3;Protein argonaute-1
NaN	NaN	NaN	22.1486	NaN	NaN	NaN	NaN	9	837.46	0.058737	79.454	AGAALPPLE	O15069	O15069	NACAD	NAC-alpha domain-containing protein 1
NaN	NaN	NaN	NaN	21.8899	NaN	NaN	NaN	16	1596.8	0.081549	73.067	AGAEILTYPSAFGSIT	Q86X76;Q86X76-5;Q86X76-2;Q86X76-4;Q86X76-3	Q86X76	NIT1	Nitrilase homolog 1
NaN	NaN	NaN	NaN	23.8106	NaN	NaN	NaN	16	1732.99	0.019683	79.652	AGAEVKSRTTLFRKIG	O95831;O95831-3;O95831-4;O95831-6	O95831	AIFM1	Apoptosis-inducing factor 1, mitochondrial
NaN	NaN	NaN	NaN	NaN	NaN	NaN	NaN	14	1552.8	0.016169	94.09	AGAFEHLPSLRQLD	Q13641	Q13641	TPBG	Trophoblast glycoprotein
NaN	21.7387	NaN	23.4855	NaN	NaN	NaN	NaN	9	727.35	0.050987	83.287	AGAGVPGEA	O00358	O00358	FOXE1	Forkhead box protein E1
NaN	NaN	NaN	NaN	NaN	NaN	NaN	NaN	10	908.483	0.0030548	141.52	AGAHLQGGAK	P04406;P04406-2	P04406	GAPDH	Glyceraldehyde-3-phosphate dehydrogenase
NaN	NaN	NaN	NaN	NaN	NaN	NaN	NaN	8	802.445	0.016293	148.49	AGAHVVIH	Q9H2F3;Q9H2F3-2	Q9H2F3	HSD3B7	3 beta-hydroxysteroid dehydrogenase type 7
NaN	NaN	NaN	NaN	26.0178	NaN	NaN	NaN	18	1968.12	0.37249	35.757	AGAQLRPPPMRPVRPVVQ	O43295;O43295-2	O43295	SRGAP3	SLIT-ROBO Rho GTPase-activating protein 3
NaN	NaN	NaN	23.832	NaN	NaN	NaN	NaN	9	729.329	0.0071773	143.02	AGATAADGP	P03971	P03971	AMH	Muellerian-inhibiting factor
NaN	NaN	26.7288	19.6163	NaN	NaN	NaN	NaN	9	870.42	0.029587	96.492	AGDDAPRAV	P60709;P63261;Q6S8J3;A5A3E0;P0CG38;P0CG39;P68133;P68032;P62736;P63267;P63267-2	P60709	ACTB;ACTG1;POTEE;POTEF;POTEI;POTEJ;ACTA1;ACTC1;ACTA2;ACTG2	Actin, cytoplasmic 1;Actin, cytoplasmic 1, N-terminally processed;Actin, cytoplasmic 2;Actin, cytoplasmic 2, N-terminally processed;POTE ankyrin domain family member E;POTE ankyrin domain family member F;POTE ankyrin domain family member I;POTE ankyrin domain family member J;Actin, alpha skeletal muscle;Actin, alpha cardiac muscle 1;Actin, aortic smooth muscle;Actin, gamma-enteric smooth muscle
NaN	NaN	NaN	NaN	24.3715	NaN	NaN	NaN	25	2588.34	0.01165	65.213	AGDDAPRAVFPSIVGRPRHQGVMVG	P60709;P63261;P68133;P68032;P62736;P63267	P60709	ACTB;ACTG1;ACTA1;ACTC1;ACTA2;ACTG2	Actin, cytoplasmic 1;Actin, cytoplasmic 1, N-terminally processed;Actin, cytoplasmic 2;Actin, cytoplasmic 2, N-terminally processed;Actin, alpha skeletal muscle;Actin, alpha cardiac muscle 1;Actin, aortic smooth muscle;Actin, gamma-enteric smooth muscle
NaN	NaN	28.7445	22.969	NaN	NaN	NaN	NaN	9	814.43	0.036942	103.83	AGDGGRVAL	P30559	P30559	OXTR	Oxytocin receptor
NaN	NaN	NaN	NaN	25.5311	NaN	NaN	NaN	18	2087.01	6.03e-20	159.4	AGDHPVELLARDFEKNYN	P09486	P09486	SPARC	SPARC
NaN	NaN	NaN	NaN	22.8758	NaN	NaN	NaN	23	2555.22	1.09e-15	155.44	AGEDPHSFYFPGQFAFSKALPRS	Q99969	Q99969	RARRES2	Retinoic acid receptor responder protein 2
25.6039	NaN	NaN	NaN	NaN	NaN	NaN	NaN	12	1215.56	0.036884	78.334	AGEELQAVESSP	O75339	O75339	CILP	Cartilage intermediate layer protein 1;Cartilage intermediate layer protein 1 C1;Cartilage intermediate layer protein 1 C2
NaN	NaN	NaN	NaN	NaN	NaN	NaN	NaN	9	856.465	0.030874	95.541	AGEGLLAVQ	P21333;P21333-2;O75369;O75369-8;O75369-2;O75369-9;O75369-6;O75369-3;O75369-7;O75369-5;O75369-4	P21333	FLNA;FLNB	Filamin-A;Filamin-B
NaN	NaN	NaN	NaN	NaN	NaN	NaN	NaN	10	975.441	0.0070784	124.08	AGFAGDDAPR	P60709;P63261;Q6S8J3;A5A3E0;P0CG38;P0CG39;P68133;P68032;P62736;P63267;P63267-2	P60709	ACTB;ACTG1;POTEE;POTEF;POTEI;POTEJ;ACTA1;ACTC1;ACTA2;ACTG2	Actin, cytoplasmic 1;Actin, cytoplasmic 1, N-terminally processed;Actin, cytoplasmic 2;Actin, cytoplasmic 2, N-terminally processed;POTE ankyrin domain family member E;POTE ankyrin domain family member F;POTE ankyrin domain family member I;POTE ankyrin domain family member J;Actin, alpha skeletal muscle;Actin, alpha cardiac muscle 1;Actin, aortic smooth muscle;Actin, gamma-enteric smooth muscle
NaN	NaN	NaN	NaN	NaN	NaN	NaN	NaN	8	803.465	0.10043	86.512	AGFRALGL	Q8NI36	Q8NI36	WDR36	WD repeat-containing protein 36
NaN	NaN	NaN	NaN	NaN	NaN	NaN	NaN	17	1782.94	0.093802	55.011	AGGELKVGTLENPLEKE	P08F94;P08F94-2	P08F94	PKHD1	Fibrocystin
NaN	NaN	NaN	NaN	NaN	NaN	21.3232	21.5686	14	1396.75	0.037428	66.498	AGGHKLGLGLEFQA	P21796	P21796	VDAC1	Voltage-dependent anion-selective channel protein 1
NaN	NaN	24.0514	25.8506	NaN	NaN	NaN	NaN	8	792.413	0.16434	71.575	AGGHPLEL	O75064	O75064	DENND4B	DENN domain-containing protein 4B
NaN	NaN	NaN	NaN	NaN	NaN	NaN	NaN	24	2315.28	0.043852	59.356	AGGKAGKDSGKAKTKAVSRSQRAG	P0C0S5	P0C0S5	H2AFZ	Histone H2A.Z
21.4388	NaN	NaN	NaN	NaN	NaN	NaN	NaN	25	2629.48	0.013423	70.917	AGGSAALSPSKKRKNSKKKNQPGKY	Q92522	Q92522	H1FX	Histone H1x
NaN	NaN	25.2005	22.5776	NaN	NaN	NaN	NaN	10	1043.58	0.0042926	133.98	AGGSLRSIQR	Q96BI3;Q96BI3-2;Q96BI3-3	Q96BI3	APH1A	Gamma-secretase subunit APH-1A
NaN	NaN	23.028	21.8277	NaN	NaN	NaN	NaN	11	1115.65	0.030514	99.802	AGGVMTALIKR	P0DMV8;P0DMV9;P0DMV8-2;P34931	P0DMV8	HSPA1A;HSPA1B;HSPA1L	Heat shock 70 kDa protein 1A;Heat shock 70 kDa protein 1B;Heat shock 70 kDa protein 1-like
NaN	NaN	22.87	22.7039	NaN	NaN	NaN	NaN	8	798.471	0.052068	107.65	AGIIGVNR	Q00610;Q00610-2	Q00610	CLTC	Clathrin heavy chain 1
NaN	NaN	NaN	NaN	26.9127	21.0282	NaN	NaN	16	1698.93	0.0010274	78.441	AGKDDYVKALPGQLKP	P09211	P09211	GSTP1	Glutathione S-transferase P
NaN	NaN	NaN	NaN	19.8139	NaN	NaN	NaN	17	1846	0.0014779	116.83	AGKDDYVKALPGQLKPF	P09211	P09211	GSTP1	Glutathione S-transferase P
NaN	NaN	NaN	NaN	23.1769	NaN	NaN	NaN	18	1975.04	3.93e-13	163.15	AGKDDYVKALPGQLKPFE	P09211	P09211	GSTP1	Glutathione S-transferase P
NaN	NaN	NaN	NaN	23.2791	20.2266	NaN	NaN	22	2478.36	4.77e-06	126.51	AGKEPGLQIWRVEKFDLVPVPT	P06396;P06396-2;P06396-4;P06396-3	P06396	GSN	Gelsolin
NaN	NaN	NaN	NaN	23.1795	NaN	NaN	NaN	23	2592.41	1.19e-07	106.58	AGKEPGLQIWRVEKFDLVPVPTN	P06396;P06396-2;P06396-4;P06396-3	P06396	GSN	Gelsolin
NaN	NaN	22.4052	NaN	NaN	NaN	NaN	NaN	8	780.435	0.075296	95.541	AGKHGVGR	P00966	P00966	ASS1	Argininosuccinate synthase
NaN	NaN	NaN	NaN	24.8673	NaN	NaN	NaN	16	1994.06	5.06e-12	160.27	AGKINYVFRHYIFNPR	Q9NYU2;Q9NYU2-2	Q9NYU2	UGGT1	UDP-glucose:glycoprotein glucosyltransferase 1
NaN	NaN	NaN	NaN	NaN	NaN	NaN	NaN	15	1826.03	0.040227	56.872	AGKRLEELRRRRGET	Q05682;Q05682-3;Q05682-4;Q05682-6;Q05682-2;Q05682-5	Q05682	CALD1	Caldesmon
NaN	NaN	NaN	NaN	NaN	NaN	NaN	NaN	16	1955.08	0.04694	44.998	AGKRLEELRRRRGETE	Q05682;Q05682-3;Q05682-4;Q05682-6;Q05682-2;Q05682-5	Q05682	CALD1	Caldesmon
23.8525	NaN	NaN	NaN	24.3623	NaN	NaN	NaN	16	1727.84	0.00032735	129.36	AGKSVTCHVKHYTNPS	P01876	P01876	IGHA1	Ig alpha-1 chain C region
NaN	NaN	NaN	NaN	25.7572	17.9451	19.6819	NaN	13	1388.79	8.6e-07	145.46	AGKYVPAIAHLIH	Q9H3G5	Q9H3G5	CPVL	Probable serine carboxypeptidase CPVL
NaN	NaN	NaN	NaN	27.2287	19.8471	19.9266	NaN	14	1475.82	6.54e-16	195.72	AGKYVPAIAHLIHS	Q9H3G5	Q9H3G5	CPVL	Probable serine carboxypeptidase CPVL
24.6737	NaN	NaN	NaN	NaN	NaN	NaN	NaN	9	900.528	0.029362	97.093	AGLSLSQLL	Q96AP0;Q96AP0-2	Q96AP0	ACD	Adrenocortical dysplasia protein homolog
NaN	NaN	NaN	NaN	20.702	NaN	NaN	NaN	14	1602.72	0.3481	42.21	AGNEYWIYSASTLE	P08253;P08253-3;P08253-2	P08253	MMP2	72 kDa type IV collagenase;PEX
NaN	NaN	NaN	NaN	25.9546	20.1567	NaN	NaN	15	1758.82	6.71e-10	200.82	AGNEYWIYSASTLER	P08253;P08253-3;P08253-2	P08253	MMP2	72 kDa type IV collagenase;PEX
NaN	NaN	NaN	NaN	24.2599	NaN	NaN	NaN	19	2204.05	7.38e-07	144.17	AGNEYWIYSASTLERGYPK	P08253;P08253-3;P08253-2	P08253	MMP2	72 kDa type IV collagenase;PEX
NaN	NaN	NaN	NaN	22.0247	NaN	NaN	NaN	17	1981.01	0.0072951	89.541	AGNFMDPSKRHQRKVPN	P13686	P13686	ACP5	Tartrate-resistant acid phosphatase type 5
NaN	NaN	NaN	NaN	22.0307	NaN	19.7749	22.5395	16	1717.89	0.0037863	103.22	AGNKLAMQEFMILPVG	P06733;P06733-2;P13929;P13929-3;P09104;P09104-2	P06733	ENO1;ENO3;ENO2	Alpha-enolase;Beta-enolase;Gamma-enolase
NaN	NaN	NaN	NaN	NaN	NaN	NaN	NaN	21	2108.17	8.79e-51	209.9	AGPGNAKKVVENGALLSWKLG	Q14118	Q14118	DAG1	Dystroglycan;Alpha-dystroglycan;Beta-dystroglycan
20.3766	NaN	NaN	NaN	NaN	NaN	NaN	NaN	9	805.376	0.1419	60.404	AGPGPGFGF	Q8TBX8;Q8TBX8-3;Q8TBX8-2	Q8TBX8	PIP4K2C	Phosphatidylinositol 5-phosphate 4-kinase type-2 gamma
NaN	NaN	NaN	NaN	NaN	NaN	22.2457	NaN	13	1416.74	0.020138	104.17	AGPHFNPLSRKHG	P00441	P00441	SOD1	Superoxide dismutase [Cu-Zn]
NaN	NaN	NaN	NaN	NaN	NaN	23.944	NaN	15	1570.81	3.17e-59	194.48	AGPHFNPLSRKHGGP	P00441	P00441	SOD1	Superoxide dismutase [Cu-Zn]
NaN	NaN	24.6429	21.3092	NaN	NaN	29.0923	23.0962	16	1698.91	3.39e-81	255.54	AGPHFNPLSRKHGGPK	P00441	P00441	SOD1	Superoxide dismutase [Cu-Zn]
NaN	NaN	NaN	NaN	NaN	NaN	24.2079	NaN	17	1813.93	8.95e-06	143.28	AGPHFNPLSRKHGGPKD	P00441	P00441	SOD1	Superoxide dismutase [Cu-Zn]
NaN	NaN	NaN	NaN	NaN	NaN	24.9795	18.4231	18	1942.98	6.2e-26	178.76	AGPHFNPLSRKHGGPKDE	P00441	P00441	SOD1	Superoxide dismutase [Cu-Zn]
NaN	NaN	NaN	NaN	NaN	NaN	19.7109	NaN	21	2365.18	1.98e-22	170.14	AGPHFNPLSRKHGGPKDEERH	P00441	P00441	SOD1	Superoxide dismutase [Cu-Zn]
NaN	NaN	NaN	24.5713	NaN	NaN	NaN	NaN	8	725.407	0.16225	72.021	AGPNIAAI	P05107	P05107	ITGB2	Integrin beta-2
21.9251	NaN	NaN	NaN	NaN	NaN	NaN	NaN	9	839.396	0.03041	95.793	AGPSHVAAM	Q92900;Q92900-2	Q92900	UPF1	Regulator of nonsense transcripts 1
NaN	NaN	NaN	NaN	NaN	NaN	23.0332	NaN	15	1697.98	0.028601	74.769	AGPVFVKVNRRTQAR	Q9H479	Q9H479	FN3K	Fructosamine-3-kinase
NaN	NaN	NaN	NaN	NaN	NaN	22.5429	NaN	16	1826.04	0.018801	80.534	AGPVFVKVNRRTQARQ	Q9H479	Q9H479	FN3K	Fructosamine-3-kinase
NaN	NaN	NaN	NaN	25.0057	NaN	NaN	NaN	18	1989.97	0.050577	62.861	AGQEKFKCIASAYYRGAQ	O95755;O95755-2	O95755	RAB36	Ras-related protein Rab-36
NaN	NaN	NaN	NaN	NaN	NaN	21.0412	NaN	15	1858.96	0.23412	37.583	AGQERFRAVTRSYYR	P61106	P61106	RAB14	Ras-related protein Rab-14
NaN	NaN	NaN	NaN	NaN	NaN	20.7542	NaN	16	1915.98	0.012522	73.707	AGQERFRAVTRSYYRG	P61106	P61106	RAB14	Ras-related protein Rab-14
NaN	NaN	NaN	NaN	NaN	NaN	23.6125	NaN	15	1598.74	2.16e-19	195.4	AGQFFSNSSIMSNPL	O95436;O95436-2	O95436	SLC34A2	Sodium-dependent phosphate transport protein 2B
NaN	NaN	NaN	NaN	NaN	NaN	NaN	NaN	17	2004.1	0.0016267	114.34	AGRDKYKTLRQIRQGNT	P35241;P35241-5;P35241-3;P35241-4;P35241-2	P35241	RDX	Radixin
NaN	NaN	NaN	21.7838	NaN	NaN	NaN	NaN	8	730.383	0.15102	74.415	AGSGGARR	P33121;P33121-2;P33121-3	P33121	ACSL1	Long-chain-fatty-acid--CoA ligase 1
NaN	NaN	27.1326	23.356	NaN	NaN	NaN	NaN	8	880.488	9.9e-15	214.25	AGSHIIQR	P30491;P10319;P30685;P30481;Q07000	P30491	HLA-B;HLA-C	HLA class I histocompatibility antigen, B-53 alpha chain;HLA class I histocompatibility antigen, B-58 alpha chain;HLA class I histocompatibility antigen, B-35 alpha chain;HLA class I histocompatibility antigen, B-44 alpha chain;HLA class I histocompatibility antigen, Cw-15 alpha chain
NaN	24.6711	NaN	NaN	NaN	NaN	NaN	NaN	9	959.508	0.05936	79.146	AGSLYHLTV	Q9HD43;Q9HD43-3;Q9HD43-2	Q9HD43	PTPRH	Receptor-type tyrosine-protein phosphatase H
NaN	NaN	22.374	NaN	NaN	NaN	NaN	NaN	9	915.514	0.032973	93.992	AGSTSIPKR	O00567	O00567	NOP56	Nucleolar protein 56
NaN	NaN	NaN	22.4385	NaN	NaN	NaN	NaN	9	907.549	0.034732	92.692	AGSVVLIIH	Q7RTP0;Q7RTP0-2	Q7RTP0	NIPA1	Magnesium transporter NIPA1
NaN	NaN	NaN	NaN	NaN	NaN	21.3956	NaN	15	1586.79	4.44e-08	157.24	AGTAFIQTQQLHAAM	P14618;P14618-2	P14618	PKM	Pyruvate kinase PKM
NaN	NaN	NaN	NaN	NaN	NaN	23.3136	NaN	16	1657.82	1.84e-53	223.14	AGTAFIQTQQLHAAMA	P14618;P14618-2	P14618	PKM	Pyruvate kinase PKM
NaN	NaN	23.2293	21.394	NaN	NaN	NaN	NaN	8	813.423	0.032715	124.37	AGTQPLEV	P22314;P22314-2	P22314	UBA1	Ubiquitin-like modifier-activating enzyme 1
NaN	NaN	NaN	NaN	NaN	NaN	20.3722	NaN	14	1467.82	0.27302	30.998	AGTVRRQAVDVSPL	P46782	P46782	RPS5	40S ribosomal protein S5;40S ribosomal protein S5, N-terminally processed
NaN	NaN	24.1328	NaN	NaN	NaN	NaN	NaN	9	916.509	0.0051222	150.88	AGTVTGQKR	Q86U44	Q86U44	METTL3	N6-adenosine-methyltransferase 70 kDa subunit
NaN	NaN	NaN	NaN	25.5242	NaN	NaN	NaN	13	1378.74	2.44e-08	141.08	AGTWLAVHPNKVS	Q9UGT4	Q9UGT4	SUSD2	Sushi domain-containing protein 2
NaN	NaN	NaN	NaN	24.033	NaN	NaN	NaN	14	1509.78	0.033154	75.483	AGTWLAVHPNKVSM	Q9UGT4	Q9UGT4	SUSD2	Sushi domain-containing protein 2
NaN	NaN	21.2246	NaN	NaN	NaN	NaN	NaN	9	854.45	0.037043	90.986	AGVAVLDNP	P48637;P48637-2	P48637	GSS	Glutathione synthetase
NaN	NaN	24.7274	25.2377	NaN	NaN	NaN	NaN	9	906.481	0.019124	106.38	AGVFVDATK	Q15149;Q15149-4;Q15149-2;Q15149-6;Q15149-9;Q15149-7;Q15149-8;Q15149-5;Q15149-3	Q15149	PLEC	Plectin
NaN	NaN	24.005	23.7087	NaN	NaN	NaN	NaN	9	892.502	0.061021	78.324	AGVGKSLYV	Q63HN8-4;Q63HN8	Q63HN8-4	RNF213	E3 ubiquitin-protein ligase RNF213
NaN	NaN	NaN	NaN	NaN	NaN	NaN	NaN	11	1222.63	0.003602	123.86	AGVLAHLEEER	P35579;P35579-2;P35580;P35580-2;P35580-5;P35580-3;P35580-4	P35579	MYH9;MYH10	Myosin-9;Myosin-10
19.8185	25.85	NaN	NaN	NaN	NaN	NaN	NaN	8	808.481	0.059078	103.41	AGVLLHSL	Q9ULT0;Q9ULT0-4	Q9ULT0	TTC7A	Tetratricopeptide repeat protein 7A
NaN	20.6172	NaN	NaN	NaN	NaN	NaN	NaN	9	869.522	0.098323	67.035	AGVLTISLP	Q96RP8	Q96RP8	KCNA7	Potassium voltage-gated channel subfamily A member 7
NaN	NaN	NaN	NaN	23.7854	NaN	NaN	NaN	15	1558.91	0.013434	76.358	AGVVHAINAIVRSPR	P12110	P12110	COL6A2	Collagen alpha-2(VI) chain
NaN	NaN	NaN	NaN	20.4669	NaN	NaN	NaN	14	1415.7	0.14389	53.683	AGVVSTGLIQNGDW	Q30154;P79483	P79483	HLA-DRB5;HLA-DRB3	HLA class II histocompatibility antigen, DR beta 5 chain;HLA class II histocompatibility antigen, DR beta 3 chain
NaN	NaN	NaN	NaN	24.0042	NaN	NaN	NaN	16	1782.99	0.02738	72.898	AGVYHEVKAMRKKAPV	Q8IUL8	Q8IUL8	CILP2	Cartilage intermediate layer protein 2;Cartilage intermediate layer protein 2 C1;Cartilage intermediate layer protein 2 C2
NaN	NaN	NaN	NaN	26.212	NaN	NaN	NaN	14	1644.87	0.07758	46.797	AGWLADQTVRYPIR	P13611;P13611-5;P13611-2;P13611-3;P13611-4	P13611	VCAN	Versican core protein
NaN	NaN	NaN	NaN	NaN	NaN	25.2852	18.2215	15	1544.85	6.31e-27	208.25	AGYALAQMGRLKGPL	P01024	P01024	C3	Complement C3;Complement C3 beta chain;C3-beta-c;Complement C3 alpha chain;C3a anaphylatoxin;Acylation stimulating protein;Complement C3b alpha chain;Complement C3c alpha chain fragment 1;Complement C3dg fragment;Complement C3g fragment;Complement C3d fragment;Complement C3f fragment;Complement C3c alpha chain fragment 2
NaN	NaN	NaN	NaN	NaN	NaN	22.4135	24.9199	16	1657.93	0.017266	82.069	AGYALAQMGRLKGPLL	P01024	P01024	C3	Complement C3;Complement C3 beta chain;C3-beta-c;Complement C3 alpha chain;C3a anaphylatoxin;Acylation stimulating protein;Complement C3b alpha chain;Complement C3c alpha chain fragment 1;Complement C3dg fragment;Complement C3g fragment;Complement C3d fragment;Complement C3f fragment;Complement C3c alpha chain fragment 2
20.0799	NaN	NaN	NaN	NaN	NaN	NaN	NaN	9	843.424	0.1419	60.404	AGYGAAVVH	Q9H6Y7	Q9H6Y7	RNF167	E3 ubiquitin-protein ligase RNF167
19.0726	NaN	26.5111	23.7356	NaN	NaN	NaN	NaN	9	1046.6	0.010819	86.794	AGYNRVRIV	O95271;O95271-2	O95271	TNKS	Tankyrase-1
NaN	NaN	NaN	NaN	NaN	NaN	22.5932	NaN	13	1427.76	0.032168	72.327	AGYRLLSRGHTPT	P98160	P98160	HSPG2	Basement membrane-specific heparan sulfate proteoglycan core protein;Endorepellin;LG3 peptide
NaN	NaN	NaN	NaN	NaN	NaN	NaN	NaN	16	1709.9	0.056653	62.055	AGYRLLSRGHTPTQPG	P98160	P98160	HSPG2	Basement membrane-specific heparan sulfate proteoglycan core protein;Endorepellin;LG3 peptide
NaN	NaN	NaN	NaN	NaN	NaN	NaN	NaN	9	976.484	0.058696	70.028	AHAHLDTGR	Q14697;Q14697-2	Q14697	GANAB	Neutral alpha-glucosidase AB
NaN	NaN	NaN	24.2772	NaN	NaN	NaN	NaN	9	984.539	0.13598	60.799	AHFLGVDKV	Q6IN84	Q6IN84	MRM1	rRNA methyltransferase 1, mitochondrial
NaN	NaN	23.3464	20.8202	NaN	NaN	NaN	NaN	9	1065.64	0.0087426	130.22	AHFVPLVKR	P30153	P30153	PPP2R1A	Serine/threonine-protein phosphatase 2A 65 kDa regulatory subunit A alpha isoform
NaN	NaN	NaN	NaN	21.2082	NaN	NaN	NaN	19	2079.06	0.0036835	86.488	AHGERAELATEEFLPVTPI	Q13200;Q13200-2;Q13200-3	Q13200	PSMD2	26S proteasome non-ATPase regulatory subunit 2
NaN	NaN	NaN	NaN	NaN	NaN	NaN	NaN	14	1486.72	0.1297	61.78	AHGVFLLNSNAMDV	P10253;P14410	P10253	GAA;SI	Lysosomal alpha-glucosidase;76 kDa lysosomal alpha-glucosidase;70 kDa lysosomal alpha-glucosidase;Sucrase-isomaltase, intestinal;Sucrase;Isomaltase
NaN	NaN	24.4613	NaN	NaN	NaN	NaN	NaN	8	979.524	0.010008	166.22	AHIYLNHI	P04818;P04818-3;P04818-2	P04818	TYMS	Thymidylate synthase
NaN	25.2011	NaN	NaN	NaN	NaN	NaN	NaN	9	962.591	0.10207	55.441	AHLANVLLL	Q12870	Q12870	TCF15	Transcription factor 15
NaN	NaN	NaN	NaN	NaN	NaN	NaN	NaN	8	809.476	0.09025	89.369	AHLGTALK	P62266	P62266	RPS23	40S ribosomal protein S23
NaN	NaN	NaN	NaN	NaN	NaN	20.7314	NaN	10	1052.53	0.11196	70.912	AHLPAEFTPA	P69905	P69905	HBA1	Hemoglobin subunit alpha
NaN	NaN	NaN	NaN	NaN	NaN	NaN	NaN	9	1096.55	0.010093	120.62	AHLPHTFQF	P54253	P54253	ATXN1	Ataxin-1
19.9879	NaN	NaN	NaN	NaN	NaN	NaN	NaN	9	1012.45	0.16019	57.559	AHPGMMQEL	Q0VD83;Q0VD83-4;Q0VD83-2	Q0VD83	APOBR	Apolipoprotein B receptor
NaN	NaN	27.0196	NaN	NaN	NaN	NaN	NaN	8	921.478	0.042694	114.72	AHPTNVQR	P35222	P35222	CTNNB1	Catenin beta-1
NaN	NaN	24.4842	NaN	NaN	NaN	NaN	NaN	9	1034.56	0.01313	114.6	AHPTNVQRL	P35222	P35222	CTNNB1	Catenin beta-1
NaN	NaN	25.5836	NaN	NaN	NaN	NaN	NaN	11	1289.6	4.17e-05	176.38	AHSDAYQTREI	Q99996-3;Q99996-2;Q99996-6	Q99996-3	AKAP9	A-kinase anchor protein 9
NaN	NaN	NaN	NaN	19.6952	NaN	NaN	NaN	17	1991	6.35e-171	252.73	AHSEFLKAASNLRDNYR	P30101	P30101	PDIA3	Protein disulfide-isomerase A3
NaN	22.9695	NaN	NaN	NaN	NaN	NaN	NaN	8	894.565	0.071598	97.068	AHVTVKKL	P22626;P22626-2	P22626	HNRNPA2B1	Heterogeneous nuclear ribonucleoproteins A2/B1
NaN	NaN	NaN	NaN	NaN	NaN	NaN	NaN	17	2076.94	0.15854	41.412	AHWTRSGENRTTMHKCY	Q5T3F8;Q5T3F8-3	Q5T3F8	TMEM63B	CSC1-like protein 2
NaN	NaN	26.1484	21.8514	NaN	NaN	NaN	NaN	9	1096.68	0.058707	67.897	AIAEIRRLR	Q9BVJ7	Q9BVJ7	DUSP23	Dual specificity protein phosphatase 23
23.165	NaN	NaN	NaN	NaN	NaN	NaN	NaN	14	1555.8	0.024152	75.387	AIAFHSNAEKILQD	Q86VW0	Q86VW0	SESTD1	SEC14 domain and spectrin repeat-containing protein 1
NaN	NaN	NaN	NaN	25.7712	NaN	NaN	NaN	8	860.487	0.0014315	184.24	AIAHLIHS	Q9H3G5	Q9H3G5	CPVL	Probable serine carboxypeptidase CPVL
NaN	NaN	22.8373	NaN	NaN	NaN	NaN	NaN	9	1000.64	0.0060931	147.51	AIATIKTKR	P68363;P68363-2;Q71U36;Q71U36-2;Q13748;Q6PEY2;Q13748-2;Q9BQE3	Q9BQE3	TUBA1B;TUBA1A;TUBA3C;TUBA3E;TUBA1C	Tubulin alpha-1B chain;Tubulin alpha-1A chain;Tubulin alpha-3C/D chain;Tubulin alpha-3E chain;Tubulin alpha-1C chain
NaN	NaN	NaN	NaN	NaN	NaN	22.7205	NaN	13	1426.77	0.18173	58.699	AIDDIRISTDVPL	O60462;O60462-5;O60462-4;O60462-2;O60462-3	O60462	NRP2	Neuropilin-2
NaN	NaN	NaN	NaN	NaN	NaN	21.5504	NaN	15	1669.85	0.0072707	107.09	AIDDIRISTDVPLEN	O60462;O60462-5;O60462-4;O60462-2;O60462-3	O60462	NRP2	Neuropilin-2
26.7095	28.8164	24.4302	28.1541	NaN	NaN	NaN	NaN	9	1092.55	0.00053586	187.78	AIDEDVLRY	Q13356;Q13356-2	Q13356	PPIL2	Peptidyl-prolyl cis-trans isomerase-like 2
NaN	NaN	23.5173	25.5324	NaN	NaN	NaN	NaN	9	1018.53	0.015079	110.81	AIDFPESKL	Q07954	Q07954	LRP1	Prolow-density lipoprotein receptor-related protein 1;Low-density lipoprotein receptor-related protein 1 85 kDa subunit;Low-density lipoprotein receptor-related protein 1 515 kDa subunit;Low-density lipoprotein receptor-related protein 1 intracellular domain
25.0105	NaN	22.1746	25.5152	NaN	NaN	NaN	NaN	8	941.461	0.082047	95.793	AIDNPLHY	A5YKK6;A5YKK6-2;A5YKK6-3;A5YKK6-4	A5YKK6	CNOT1	CCR4-NOT transcription complex subunit 1
27.4317	29.0574	29.326	28.3712	NaN	NaN	NaN	NaN	9	1100.55	0.012056	121.05	AIDQLHLEY	O43707;O43707-2;O43707-3	O43707	ACTN4	Alpha-actinin-4
NaN	NaN	NaN	NaN	22.2935	NaN	NaN	NaN	17	1956.02	0.26401	43.454	AIDQLHLEYAKRAAPFN	O43707;O43707-2;O43707-3	O43707	ACTN4	Alpha-actinin-4
NaN	NaN	NaN	NaN	NaN	NaN	NaN	NaN	9	900.466	0.029408	106.14	AIDRAGAEV	O95831;O95831-3;O95831-4;O95831-6	O95831	AIFM1	Apoptosis-inducing factor 1, mitochondrial
NaN	23.6752	NaN	NaN	NaN	NaN	NaN	NaN	9	1075.6	0.048398	84.568	AIDRLVNIY	Q9H0D6;Q9H0D6-2	Q9H0D6	XRN2	5-3 exoribonuclease 2
NaN	NaN	22.1696	22.6283	NaN	NaN	NaN	NaN	8	834.412	0.05612	105.2	AIDSPVSF	Q92900;Q92900-2	Q92900	UPF1	Regulator of nonsense transcripts 1
NaN	NaN	25.5028	NaN	NaN	NaN	NaN	NaN	8	945.477	0.13014	79.116	AIDTEERL	Q04637;Q04637-3;Q04637-8;Q04637-6;Q04637-7;Q04637-5;Q04637-4;Q04637-9	Q04637	EIF4G1	Eukaryotic translation initiation factor 4 gamma 1
NaN	NaN	NaN	NaN	22.1877	NaN	NaN	NaN	16	1711.9	0.0040134	131.32	AIEALNDGELQKAIDL	P50502;Q8IZP2	P50502	ST13;ST13P4	Hsc70-interacting protein;Putative protein FAM10A4
NaN	NaN	NaN	NaN	NaN	NaN	NaN	NaN	9	887.496	0.034556	92.822	AIEGLATLT	O75808	O75808	CAPN15	Calpain-15
NaN	NaN	NaN	NaN	NaN	NaN	NaN	NaN	18	1970.05	0.0050109	88.551	AIEPPPLDAVIEAEHTLR	Q08211	Q08211	DHX9	ATP-dependent RNA helicase A
23.2591	22.103	NaN	22.7838	NaN	NaN	NaN	NaN	9	1036.51	0.064047	77.058	AIETQLAEY	O14777	O14777	NDC80	Kinetochore protein NDC80 homolog
NaN	NaN	NaN	NaN	NaN	NaN	NaN	NaN	9	1102.62	0.027406	76.679	AIFDQVVRR	P18440	P18440	NAT1	Arylamine N-acetyltransferase 1
NaN	NaN	NaN	NaN	21.8025	22.7823	NaN	NaN	12	1376.73	0.026206	99.815	AIFFLPDEGKLQ	P01009;P01009-2;P01009-3	P01009	SERPINA1	Alpha-1-antitrypsin;Short peptide from AAT
NaN	NaN	NaN	NaN	20.3516	NaN	NaN	NaN	12	1349.76	0.33579	51.066	AIFFLPDSSKLL	P33908;P33908-2	P33908	MAN1A1	Mannosyl-oligosaccharide 1,2-alpha-mannosidase IA
NaN	NaN	NaN	NaN	21.3541	20.8153	NaN	NaN	13	1436.79	0.20384	56.404	AIFFLPDSSKLLS	P33908;P33908-2	P33908	MAN1A1	Mannosyl-oligosaccharide 1,2-alpha-mannosidase IA
NaN	NaN	NaN	NaN	23.1518	22.6909	NaN	NaN	14	1493.81	0.023181	83.045	AIFFLPDSSKLLSG	P33908;P33908-2	P33908	MAN1A1	Mannosyl-oligosaccharide 1,2-alpha-mannosidase IA
NaN	NaN	NaN	NaN	NaN	NaN	NaN	NaN	14	1573.79	8.73e-99	256.96	AIFQSLARAYSSFN	P16870;P16870-2	P16870	CPE	Carboxypeptidase E
NaN	NaN	NaN	NaN	NaN	NaN	24.5543	NaN	13	1530.91	0.00011229	153.38	AIFRSLTKRNAVR	Q99985;Q99985-2	Q99985	SEMA3C	Semaphorin-3C
NaN	NaN	NaN	NaN	NaN	NaN	22.3376	NaN	14	1631.96	0.020943	85.837	AIFRSLTKRNAVRT	Q99985;Q99985-2	Q99985	SEMA3C	Semaphorin-3C
NaN	NaN	23.2898	22.8042	NaN	NaN	NaN	NaN	9	1096.6	0.088826	69.812	AIFTKAYQR	P52701;P52701-3;P52701-4;P52701-2	P52701	MSH6	DNA mismatch repair protein Msh6
NaN	NaN	23.8386	NaN	NaN	NaN	NaN	NaN	10	983.565	0.047397	88.358	AIGSQPVLTV	Q96DZ1;Q96DZ1-3	Q96DZ1	ERLEC1	Endoplasmic reticulum lectin 1
NaN	NaN	NaN	NaN	23.1591	NaN	NaN	NaN	16	1897.94	0.11653	52.522	AIHFYNKSLAEHRTPD	P31948;P31948-3;P31948-2	P31948	STIP1	Stress-induced-phosphoprotein 1
NaN	NaN	NaN	NaN	23.2308	NaN	NaN	NaN	14	1678.89	0.024852	80.96	AIHLYVKDPARPWN	P07333;P07333-2	P07333	CSF1R	Macrophage colony-stimulating factor 1 receptor
NaN	NaN	22.7073	24.3447	NaN	NaN	NaN	NaN	10	1113.62	0.020792	105.4	AIIDHIFASK	Q8TAS1;Q8TAS1-2;Q8TAS1-3	Q8TAS1	UHMK1	Serine/threonine-protein kinase Kist
23.2467	25.4543	NaN	NaN	NaN	NaN	NaN	NaN	9	1006.54	0.0098553	121.09	AIIERTASF	Q12872;Q12872-2	Q12872	SFSWAP	Splicing factor, suppressor of white-apricot homolog
NaN	NaN	23.9364	23.2663	NaN	NaN	NaN	NaN	8	868.575	0.07159	97.071	AIIPSKKL	P08708	P08708	RPS17	40S ribosomal protein S17
20.9358	NaN	NaN	NaN	NaN	NaN	NaN	NaN	9	1008.5	0.035755	91.9	AIITPQTCY	P35869	P35869	AHR	Aryl hydrocarbon receptor
NaN	NaN	NaN	NaN	23.7689	NaN	NaN	NaN	17	1939.14	0.00067231	106.38	AIKDFVLKYALPLVGHR	P13667	P13667	PDIA4	Protein disulfide-isomerase A4
NaN	NaN	NaN	NaN	24.4344	NaN	NaN	NaN	14	1592.9	6.04e-07	166.48	AIKELGDHVTNLRK	P02794	P02794	FTH1	Ferritin heavy chain;Ferritin heavy chain, N-terminally processed
NaN	NaN	NaN	NaN	26.4342	NaN	NaN	NaN	19	2078.09	0.0041373	85.636	AIKELGDHVTNLRKMGAPE	P02794	P02794	FTH1	Ferritin heavy chain;Ferritin heavy chain, N-terminally processed
NaN	23.6172	NaN	NaN	NaN	NaN	NaN	NaN	9	960.601	0.10066	69.176	AIKLVTAVF	Q6KC79;Q6KC79-2	Q6KC79	NIPBL	Nipped-B-like protein
NaN	NaN	NaN	NaN	NaN	NaN	NaN	NaN	15	1614.83	9.65e-05	134.98	AILVDLEPGTMDSVR	P07437;Q13885;Q9BVA1;Q13509	P07437	TUBB;TUBB2A;TUBB2B;TUBB3	Tubulin beta chain;Tubulin beta-2A chain;Tubulin beta-2B chain;Tubulin beta-3 chain
NaN	NaN	NaN	NaN	NaN	NaN	NaN	NaN	17	1874	0.040483	64.82	AIMARIAQFLSDIPETV	P09110;P09110-2	P09110	ACAA1	3-ketoacyl-CoA thiolase, peroxisomal
NaN	NaN	27.4227	29.598	NaN	NaN	NaN	NaN	9	1008.63	0.035075	105.39	AINPKLLQL	P17844;P17844-2	P17844	DDX5	Probable ATP-dependent RNA helicase DDX5
NaN	NaN	24.855	25.94	NaN	NaN	NaN	NaN	9	1026.59	0.010081	120.65	AINPKLMQL	Q92841;Q92841-3;Q92841-1;Q92841-2	Q92841	DDX17	Probable ATP-dependent RNA helicase DDX17
NaN	NaN	25.1116	25.0925	NaN	NaN	NaN	NaN	9	987.55	0.00099377	140.98	AIPGFTINR	Q9UDX5	Q9UDX5	MTFP1	Mitochondrial fission process protein 1
NaN	NaN	NaN	NaN	24.5485	NaN	NaN	NaN	24	2841.53	0.0052526	72.676	AIPREDKEEILMLHNKLRGQVQPQ	Q9H0B8;Q9H0B8-5;Q9H0B8-4;Q9H0B8-3;Q9H0B8-2	Q9H0B8	CRISPLD2	Cysteine-rich secretory protein LCCL domain-containing 2
NaN	NaN	NaN	22.016	NaN	NaN	NaN	NaN	9	1036.56	0.053009	93.374	AIQDHLLEV	P12270;P12270-2	P12270	TPR	Nucleoprotein TPR
NaN	NaN	NaN	NaN	NaN	NaN	NaN	NaN	15	1675.81	0.00911	120.96	AIQLTYNPDESSKPN	P02679;P02679-2	P02679	FGG	Fibrinogen gamma chain
NaN	NaN	NaN	NaN	NaN	NaN	21.2836	NaN	17	1806.08	0.019754	75.574	AIRGQILSKLRLASPPS	P01137	P01137	TGFB1	Transforming growth factor beta-1;Latency-associated peptide
NaN	NaN	23.8885	22.1437	NaN	NaN	NaN	NaN	8	886.56	0.033091	123.99	AIRVTKTV	Q9BZH6	Q9BZH6	WDR11	WD repeat-containing protein 11
20.4238	NaN	NaN	NaN	NaN	NaN	NaN	NaN	11	1223.71	0.12342	66.92	AIRVTNPNARL	P62910	P62910	RPL32	60S ribosomal protein L32
21.8103	NaN	NaN	NaN	NaN	NaN	NaN	NaN	17	1968.01	0.006167	76.82	AIRVTNPNARLRSEENE	P62910	P62910	RPL32	60S ribosomal protein L32
NaN	NaN	NaN	NaN	NaN	NaN	NaN	19.7425	15	1698.83	0.061342	97.813	AISDYVFNTASLVYH	P18428	P18428	LBP	Lipopolysaccharide-binding protein
NaN	NaN	NaN	NaN	NaN	NaN	NaN	NaN	16	1827.87	3.32e-19	220.1	AISDYVFNTASLVYHE	P18428	P18428	LBP	Lipopolysaccharide-binding protein
NaN	NaN	NaN	NaN	NaN	NaN	NaN	20.1064	17	1956.91	1.77e-73	274.59	AISDYVFNTASLVYHEE	P18428	P18428	LBP	Lipopolysaccharide-binding protein
NaN	NaN	NaN	NaN	NaN	NaN	NaN	NaN	18	2013.93	5.34e-26	180.2	AISDYVFNTASLVYHEEG	P18428	P18428	LBP	Lipopolysaccharide-binding protein
NaN	NaN	23.1126	21.6197	NaN	NaN	NaN	NaN	10	984.608	0.022007	104.44	AITAIKGVGR	P62269	P62269	RPS18	40S ribosomal protein S18
NaN	NaN	NaN	NaN	NaN	NaN	24.4466	NaN	14	1561.9	5.28e-06	122.56	AITFKKLVKGHAYS	P07384	P07384	CAPN1	Calpain-1 catalytic subunit
NaN	NaN	23.9838	23.0144	NaN	NaN	NaN	NaN	9	1063.6	0.0018616	141.52	AITLAERKY	Q8TBA6;Q8TBA6-2	Q8TBA6	GOLGA5	Golgin subfamily A member 5
NaN	NaN	27.3612	22.8758	NaN	NaN	NaN	NaN	9	971.576	0.0067702	145.16	AITQVVVSR	Q9H9B4	Q9H9B4	SFXN1	Sideroflexin-1
NaN	NaN	NaN	NaN	NaN	NaN	NaN	NaN	9	999.644	0.024271	91.318	AITTKVLRV	Q15477	Q15477	SKIV2L	Helicase SKI2W
22.0813	NaN	NaN	NaN	NaN	NaN	NaN	NaN	8	929.508	0.033179	132.09	AIVARHTY	Q9H3M7;Q9H3M7-2	Q9H3M7	TXNIP	Thioredoxin-interacting protein
NaN	NaN	NaN	22.8203	NaN	NaN	NaN	NaN	10	1141.61	0.011624	114.89	AIVDVIDQNR	P50914	P50914	RPL14	60S ribosomal protein L14
NaN	NaN	27.1082	28.3713	NaN	NaN	NaN	NaN	9	955.545	0.0019557	170.73	AIVDVVANR	P20073;P20073-2	P20073	ANXA7	Annexin A7
NaN	NaN	22.5512	24.1321	NaN	NaN	NaN	NaN	9	1102.72	0.02003	105.39	AIYKRVLKL	Q86U86;Q86U86-8;Q86U86-5;Q86U86-4;Q86U86-7;Q86U86-3;Q86U86-9;Q86U86-2;Q86U86-6	Q86U86	PBRM1	Protein polybromo-1
NaN	NaN	NaN	NaN	24.3971	NaN	NaN	NaN	8	833.501	0.31092	52.636	AKASVFIV	Q8NGH5	Q8NGH5	OR56A1	Olfactory receptor 56A1
NaN	NaN	NaN	NaN	NaN	NaN	NaN	NaN	8	800.476	0.034858	122.18	AKAVTQAL	Q9Y490	Q9Y490	TLN1	Talin-1
NaN	NaN	NaN	NaN	24.9664	NaN	NaN	NaN	21	2301.12	0.30865	39.863	AKCSALEELNLENNNISTLPE	Q9UQ13;Q9UQ13-2	Q9UQ13	SHOC2	Leucine-rich repeat protein SHOC-2
NaN	NaN	NaN	NaN	NaN	NaN	21.3819	NaN	11	1298.69	0.34799	51.979	AKDFEKAYKTV	P43686;P43686-2	P43686	PSMC4	26S protease regulatory subunit 6B
NaN	21.3063	NaN	NaN	NaN	NaN	NaN	NaN	8	914.507	0.10214	86.086	AKEEINVL	Q14314	Q14314	FGL2	Fibroleukin
NaN	NaN	NaN	NaN	NaN	NaN	22.3117	NaN	15	1573.85	0.0071375	83.54	AKEGFEKISKGANPV	P10809;P10809-2	P10809	HSPD1	60 kDa heat shock protein, mitochondrial
NaN	NaN	NaN	NaN	NaN	NaN	23.8252	NaN	18	2089.19	1.06e-62	231.37	AKEKGTWVQLKRQPAPPR	P46778	P46778	RPL21	60S ribosomal protein L21
NaN	NaN	NaN	NaN	20.4077	NaN	NaN	NaN	14	1794.93	0.026699	62.042	AKEQLEIRHRNRMD	Q06481;Q06481-5;Q06481-4;Q06481-2;Q06481-3;Q06481-6	Q06481	APLP2	Amyloid-like protein 2
NaN	NaN	NaN	NaN	21.5378	21.5389	NaN	NaN	15	1951.03	0.0030083	116.87	AKEQLEIRHRNRMDR	Q06481;Q06481-5;Q06481-4;Q06481-2;Q06481-3;Q06481-6	Q06481	APLP2	Amyloid-like protein 2
NaN	NaN	NaN	NaN	23.7627	NaN	NaN	NaN	17	2178.19	0.0094643	86.548	AKEQLEIRHRNRMDRVK	Q06481;Q06481-5;Q06481-4;Q06481-2;Q06481-3;Q06481-6	Q06481	APLP2	Amyloid-like protein 2
NaN	NaN	NaN	NaN	NaN	NaN	NaN	23.7506	16	1667.82	0.00096975	120.87	AKETFGVNNAVYGIDA	O75822;O75822-3	O75822	EIF3J	Eukaryotic translation initiation factor 3 subunit J
NaN	NaN	NaN	NaN	24.1073	NaN	NaN	NaN	18	2056	1.55e-08	153.36	AKGEKFVMQEEFSRDGKA	P30101	P30101	PDIA3	Protein disulfide-isomerase A3
22.1393	NaN	NaN	NaN	NaN	NaN	NaN	NaN	8	795.424	0.030815	134.12	AKGPSHSL	Q8WV48;Q8WV48-5	Q8WV48	CCDC107	Coiled-coil domain-containing protein 107
26.9595	NaN	NaN	NaN	NaN	NaN	NaN	NaN	11	1129.66	0.034786	82.452	AKGVRSSGQKI	Q8NEM2	Q8NEM2	SHCBP1	SHC SH2 domain-binding protein 1
NaN	NaN	22.8282	NaN	NaN	NaN	NaN	NaN	8	987.573	0.025187	132.09	AKIHIHRN	P26012;P26012-2	P26012	ITGB8	Integrin beta-8
22.6949	NaN	NaN	NaN	NaN	NaN	NaN	NaN	12	1382.88	0.0019963	124.6	AKIKARDLRGKK	P42766	P42766	RPL35	60S ribosomal protein L35
22.6994	NaN	NaN	NaN	NaN	NaN	NaN	NaN	13	1510.98	5.83e-25	141.58	AKIKARDLRGKKK	P42766	P42766	RPL35	60S ribosomal protein L35
NaN	NaN	NaN	NaN	NaN	NaN	21.4236	NaN	17	1986.17	0.00023683	131.56	AKIRIFDLGRKKAKVDE	P27635;Q96L21	P27635	RPL10;RPL10L	60S ribosomal protein L10;60S ribosomal protein L10-like
NaN	NaN	NaN	NaN	22.3972	NaN	NaN	NaN	18	2178.2	0.25552	41.871	AKKFHLRPELRSQMQGPR	Q53G59;Q53G59-2	Q53G59	KLHL12	Kelch-like protein 12
NaN	NaN	NaN	NaN	NaN	NaN	20.6416	NaN	16	1954.15	0.13922	50.155	AKKNVRAFWKLRANPR	Q9BWW8	Q9BWW8	APOL6	Apolipoprotein L6
NaN	NaN	NaN	NaN	NaN	NaN	NaN	NaN	16	1712	0.033964	51.888	AKKVVENGALLSWKLG	Q14118	Q14118	DAG1	Dystroglycan;Alpha-dystroglycan;Beta-dystroglycan
NaN	NaN	25.2453	25.806	NaN	NaN	NaN	NaN	8	826.539	0.13563	77.748	AKLAIRVG	Q9NX61;Q9NX61-2	Q9NX61	TMEM161A	Transmembrane protein 161A
NaN	NaN	NaN	NaN	23.5391	NaN	NaN	NaN	22	2582.31	0.033742	63.869	AKLHDRNTYEKYLGEEYVKAVG	P02787	P02787	TF	Serotransferrin
NaN	NaN	NaN	NaN	NaN	NaN	NaN	NaN	9	1042.53	0.11053	64.757	AKMANYAKF	Q6ZMG9;Q6ZMG9-2	Q6ZMG9	CERS6	Ceramide synthase 6
NaN	NaN	NaN	NaN	26.0327	NaN	NaN	NaN	15	1913.98	1.83e-26	194.77	AKMREWFSETFQKVK	P02654	P02654	APOC1	Apolipoprotein C-I;Truncated apolipoprotein C-I
NaN	NaN	NaN	NaN	23.4096	NaN	NaN	NaN	16	2043.02	0.0023484	112.3	AKMREWFSETFQKVKE	P02654	P02654	APOC1	Apolipoprotein C-I;Truncated apolipoprotein C-I
NaN	NaN	NaN	NaN	26.8639	18.5929	NaN	NaN	17	2171.12	3.18e-33	205.98	AKMREWFSETFQKVKEK	P02654	P02654	APOC1	Apolipoprotein C-I;Truncated apolipoprotein C-I
NaN	NaN	NaN	NaN	20.0865	NaN	NaN	NaN	18	2284.2	0.0011497	110.44	AKMREWFSETFQKVKEKL	P02654	P02654	APOC1	Apolipoprotein C-I;Truncated apolipoprotein C-I
NaN	NaN	NaN	NaN	26.1488	NaN	NaN	NaN	19	2412.3	1.05e-05	141.07	AKMREWFSETFQKVKEKLK	P02654	P02654	APOC1	Apolipoprotein C-I;Truncated apolipoprotein C-I
NaN	NaN	NaN	NaN	NaN	NaN	NaN	NaN	22	2727.44	0.00049261	85.062	AKMREWFSETFQKVKEKLKIDS	P02654	P02654	APOC1	Apolipoprotein C-I;Truncated apolipoprotein C-I
NaN	NaN	NaN	NaN	22.8236	NaN	NaN	NaN	16	1851.91	0.040535	65.225	AKNSLYLQMNSLRAED	A0A0B4J1V1;P01763;P01762;P01782;P01780	A0A0B4J1V1	IGHV3-21	Ig heavy chain V-III region WEA;Ig heavy chain V-III region TRO;Ig heavy chain V-III region DOB;Ig heavy chain V-III region JON
NaN	NaN	NaN	NaN	NaN	NaN	20.7514	NaN	16	1750.89	0.0070244	113.61	AKNTFYETLPVAINGN	O00469;O00469-2	O00469	PLOD2	Procollagen-lysine,2-oxoglutarate 5-dioxygenase 2
NaN	NaN	NaN	NaN	19.9624	NaN	NaN	NaN	17	1966.98	3.01e-12	159.02	AKNTLYLQMNSLRAEDT	A0A0B4J1X5	A0A0B4J1X5	IGHV3-74
NaN	NaN	NaN	NaN	NaN	NaN	NaN	NaN	9	1043.52	0.068162	75.854	AKPEDRESL	Q969V5	Q969V5	MUL1	Mitochondrial ubiquitin ligase activator of NFKB 1
NaN	NaN	NaN	NaN	NaN	NaN	NaN	NaN	16	1663.1	0.023553	84.753	AKPKAAKPKKAAAKKK	P10412	P10412	HIST1H1E	Histone H1.4
NaN	NaN	NaN	25.022	NaN	NaN	NaN	NaN	15	1494.97	0.14735	50.843	AKPKAKKAGAAKAKK	P16401;P10412	P10412	HIST1H1B;HIST1H1E	Histone H1.5;Histone H1.4
NaN	23.7201	NaN	NaN	NaN	NaN	NaN	NaN	14	1462.93	0.057876	64.798	AKPKTAKPKAAKPK	P10412	P10412	HIST1H1E	Histone H1.4
21.1099	23.8439	NaN	NaN	NaN	NaN	NaN	NaN	9	1071.68	0.066031	58.604	AKPRLLVLY	Q68BL8	Q68BL8	OLFML2B	Olfactomedin-like protein 2B
NaN	NaN	NaN	NaN	NaN	NaN	NaN	NaN	24	2449.15	1.9e-06	93.572	AKPRNQGGYGGSSSSSSYGSGRRF	P09651-2;P09651;P09651-3	P09651-2	HNRNPA1	Heterogeneous nuclear ribonucleoprotein A1;Heterogeneous nuclear ribonucleoprotein A1, N-terminally processed
NaN	NaN	NaN	NaN	NaN	NaN	NaN	NaN	13	1390.88	0.067374	62.14	AKPSVPKVPKGRK	Q92522	Q92522	H1FX	Histone H1x
NaN	NaN	NaN	NaN	NaN	NaN	NaN	NaN	14	1823.09	0.20703	47.915	AKQYHRILKRRQAR	P23511;P23511-2	P23511	NFYA	Nuclear transcription factor Y subunit alpha
NaN	NaN	NaN	NaN	NaN	NaN	21.2244	NaN	14	1574.85	1.53e-15	154.86	AKRQFVQSAKEVAN	Q9Y490	Q9Y490	TLN1	Talin-1
NaN	NaN	NaN	NaN	NaN	NaN	22.3603	NaN	16	1762.93	8.12e-12	142.45	AKRQFVQSAKEVANST	Q9Y490	Q9Y490	TLN1	Talin-1
NaN	NaN	NaN	NaN	NaN	21.6848	NaN	NaN	17	1924.14	1.28e-12	163.45	AKRTKKVGIVGKYGTRY	P61513	P61513	RPL37A	60S ribosomal protein L37a
NaN	NaN	NaN	NaN	NaN	NaN	NaN	NaN	19	2052.2	0.0057487	82.609	AKRTKKVGIVGKYGTRYGA	P61513	P61513	RPL37A	60S ribosomal protein L37a
21.8666	NaN	NaN	NaN	NaN	NaN	NaN	NaN	8	808.444	0.031798	125.31	AKSGTKAF	P07900;P07900-2;Q14568;P08238	P07900	HSP90AA1;HSP90AA2P;HSP90AB1	Heat shock protein HSP 90-alpha;Heat shock protein HSP 90-alpha A2;Heat shock protein HSP 90-beta
NaN	NaN	NaN	NaN	NaN	NaN	NaN	NaN	23	2608.45	5.7e-14	149.62	AKSYFEKSKEQLTPLIKKAGTEL	P02652	P02652	APOA2	Apolipoprotein A-II;Proapolipoprotein A-II;Truncated apolipoprotein A-II
NaN	23.14	23.3134	NaN	NaN	NaN	23.5134	20.142	16	1587.79	5.16e-67	242.41	AKTDQAQKAEGAGDAK	P05204	P05204	HMGN2	Non-histone chromosomal protein HMG-17
NaN	NaN	NaN	NaN	NaN	NaN	19.8152	NaN	16	1616.94	0.22151	42.52	AKVTLNGVPAQPLGPR	P05362	P05362	ICAM1	Intercellular adhesion molecule 1
NaN	NaN	NaN	19.9825	NaN	NaN	NaN	NaN	10	1253.71	0.16184	63.486	AKYNKILNKY	Q92608	Q92608	DOCK2	Dedicator of cytokinesis protein 2
21.716	NaN	NaN	NaN	NaN	NaN	NaN	NaN	17	1818.96	0.026469	69.594	ALAAAGYDVEKNNSRIK	P16403;P22492;P10412;P16402;Q02539	P16403	HIST1H1C;HIST1H1T;HIST1H1E;HIST1H1D;HIST1H1A	Histone H1.2;Histone H1t;Histone H1.4;Histone H1.3;Histone H1.1
20.9436	NaN	NaN	NaN	NaN	NaN	NaN	NaN	21	2230.24	0.00035885	86.479	ALAAAGYDVEKNNSRIKLGLK	P16403;P10412;P16402	P16403	HIST1H1C;HIST1H1E;HIST1H1D	Histone H1.2;Histone H1.4;Histone H1.3
NaN	NaN	NaN	NaN	NaN	NaN	NaN	NaN	11	1279.65	0.0048942	108.47	ALAEEVEQVHR	Q9BQE5	Q9BQE5	APOL2	Apolipoprotein L2
NaN	NaN	22.3029	NaN	NaN	NaN	NaN	NaN	9	835.517	0.14973	58.661	ALAPPAALL	Q14183	Q14183	DOC2A	Double C2-like domain-containing protein alpha
20.017	NaN	NaN	NaN	NaN	NaN	NaN	NaN	9	825.46	0.075658	73.039	ALAPTPSAV	Q9UPR0	Q9UPR0	PLCL2	Inactive phospholipase C-like protein 2
NaN	NaN	23.2062	22.2142	NaN	NaN	NaN	NaN	9	977.474	0.090291	69.383	ALDDMISTL	P49368;P49368-2	P49368	CCT3	T-complex protein 1 subunit gamma
NaN	NaN	25.3616	25.3464	NaN	NaN	NaN	NaN	9	972.476	0.0058011	170.87	ALDEPTTNL	Q92878;Q92878-2;Q92878-3	Q92878	RAD50	DNA repair protein RAD50
NaN	NaN	NaN	21.6759	NaN	NaN	18.9045	21.638	14	1537.76	4.04e-148	304.7	ALDFFGNGPPVNYK	P13284	P13284	IFI30	Gamma-interferon-inducible lysosomal thiol reductase
NaN	NaN	NaN	NaN	NaN	NaN	NaN	NaN	16	1695.83	4.59e-137	279.38	ALDFFGNGPPVNYKTG	P13284	P13284	IFI30	Gamma-interferon-inducible lysosomal thiol reductase
NaN	NaN	NaN	NaN	NaN	NaN	NaN	NaN	18	1922.95	3.41e-211	317.77	ALDFFGNGPPVNYKTGNL	P13284	P13284	IFI30	Gamma-interferon-inducible lysosomal thiol reductase
NaN	NaN	22.3291	23.4809	NaN	NaN	NaN	NaN	10	1137.49	0.13502	66.429	ALDGGFQMHY	Q9Y6B2;Q9Y6B2-2	Q9Y6B2	EID1	EP300-interacting inhibitor of differentiation 1
NaN	NaN	24.4866	NaN	NaN	NaN	NaN	NaN	10	1185.53	0.035324	95.358	ALDGRETDFY	Q5VT25;Q5VT25-2;Q5VT25-3;Q5VT25-4;Q5VT25-5;Q5VT25-6	Q5VT25	CDC42BPA	Serine/threonine-protein kinase MRCK alpha
NaN	NaN	24.276	24.693	NaN	NaN	NaN	NaN	9	942.575	0.016751	121.62	ALDKATVLL	Q53EL6;Q53EL6-2	Q53EL6	PDCD4	Programmed cell death protein 4
24.881	NaN	24.6155	21.7933	NaN	NaN	NaN	NaN	10	1160.62	0.00096523	153.24	ALDKDAPLRY	Q9BQT9;Q9BQT9-2	Q9BQT9	CLSTN3	Calsyntenin-3
NaN	NaN	21.7029	22.3122	NaN	NaN	NaN	NaN	8	940.607	0.11348	91.041	ALDKIRLI	P14625	P14625	HSP90B1	Endoplasmin
NaN	NaN	NaN	21.1242	NaN	NaN	NaN	NaN	24	2636.36	5.44e-08	103.84	ALDLFSDNAPPPELLEIINEDIAK	Q15084;Q15084-5;Q15084-3;Q15084-4;Q15084-2	Q15084	PDIA6	Protein disulfide-isomerase A6
23.8022	26.9259	NaN	25.7677	NaN	NaN	NaN	NaN	9	1055.49	0.023649	117.93	ALDNSQVFY	O94956;O94956-3;O94956-4;O94956-2	O94956	SLCO2B1	Solute carrier organic anion transporter family member 2B1
NaN	NaN	19.318	20.6169	NaN	NaN	NaN	NaN	12	1354.64	0.019716	104.44	ALDNTDLVFGQY	P12694;P12694-2	P12694	BCKDHA	2-oxoisovalerate dehydrogenase subunit alpha, mitochondrial
22.4869	24.4046	NaN	NaN	NaN	NaN	NaN	NaN	9	1140.55	0.0016896	157.68	ALDQFQEKY	A0AVT1;A0AVT1-3	A0AVT1	UBA6	Ubiquitin-like modifier-activating enzyme 6
17.6451	NaN	NaN	NaN	NaN	NaN	NaN	NaN	9	1118.52	0.0082962	134.81	ALDQNKMHY	P15088	P15088	CPA3	Mast cell carboxypeptidase A
NaN	23.1934	NaN	NaN	NaN	NaN	NaN	NaN	9	1104.52	0.049116	95.909	ALDRFSSFY	Q8IWT3;Q8IWT3-3	Q8IWT3	CUL9	Cullin-9
NaN	NaN	NaN	NaN	NaN	NaN	NaN	NaN	9	993.488	0.099495	66.692	ALDRGTAQY	Q9UBX1	Q9UBX1	CTSF	Cathepsin F
NaN	NaN	21.7986	NaN	NaN	NaN	NaN	NaN	9	845.449	0.081848	71.852	ALDSGASLL	P57078;P57078-2	P57078	RIPK4	Receptor-interacting serine/threonine-protein kinase 4
NaN	NaN	22.609	20.7856	NaN	NaN	NaN	NaN	9	1045.51	0.054328	81.635	ALDSHILDY	Q9BV44	Q9BV44	THUMPD3	THUMP domain-containing protein 3
23.9205	24.9448	NaN	23.0321	NaN	NaN	NaN	NaN	9	967.486	0.038821	89.673	ALDSSSILY	Q8TC07;Q8TC07-2;Q8TC07-3	Q8TC07	TBC1D15	TBC1 domain family member 15
25.3598	23.0071	24.5218	26.2161	NaN	NaN	NaN	NaN	9	1035.57	0.0017878	163.2	ALDTKIGRY	O60264	O60264	SMARCA5	SWI/SNF-related matrix-associated actin-dependent regulator of chromatin subfamily A member 5
NaN	NaN	22.2683	22.8077	NaN	NaN	NaN	NaN	8	844.436	0.15945	72.618	ALDTPVMV	Q9NV06	Q9NV06	DCAF13	DDB1- and CUL4-associated factor 13
NaN	NaN	23.0381	NaN	NaN	NaN	NaN	NaN	9	946.476	0.046988	85.265	ALDVPASQF	P49815;P49815-3;P49815-4;P49815-7;P49815-6;P49815-5;P49815-2	P49815	TSC2	Tuberin
25.6643	20.1905	NaN	NaN	NaN	NaN	NaN	NaN	9	1004.55	0.031782	94.662	ALDVVNLVY	O95236;O95236-3;O95236-2	O95236	APOL3	Apolipoprotein L3
NaN	NaN	NaN	NaN	NaN	NaN	NaN	NaN	9	1037.51	0.046756	85.38	ALEAQTSRY	Q9BQI3;Q9BQI3-2	Q9BQI3	EIF2AK1	Eukaryotic translation initiation factor 2-alpha kinase 1
NaN	NaN	NaN	NaN	NaN	NaN	NaN	NaN	9	969.561	0.065342	66.073	ALEARVAQL	Q8NAA4;Q8NAA4-3;Q8NAA4-2	Q8NAA4	ATG16L2	Autophagy-related protein 16-2
NaN	NaN	NaN	NaN	19.8178	NaN	NaN	NaN	12	1413.77	0.037938	92.439	ALEFHTVPFQLL	Q08380	Q08380	LGALS3BP	Galectin-3-binding protein
NaN	NaN	NaN	NaN	23.448	NaN	NaN	NaN	14	1640.9	2.4e-07	145.31	ALEFHTVPFQLLAR	Q08380	Q08380	LGALS3BP	Galectin-3-binding protein
NaN	NaN	NaN	NaN	20.8672	NaN	NaN	NaN	15	1803.97	0.0049231	89.43	ALEFHTVPFQLLARY	Q08380	Q08380	LGALS3BP	Galectin-3-binding protein
NaN	NaN	NaN	NaN	22.961	24.6647	NaN	NaN	15	1624.86	1e-10	202.32	ALEIFKQASAFSRAS	Q15582	Q15582	TGFBI	Transforming growth factor-beta-induced protein ig-h3
NaN	NaN	NaN	NaN	24.8897	27.3414	NaN	NaN	16	1752.92	5.09e-95	260.25	ALEIFKQASAFSRASQ	Q15582	Q15582	TGFBI	Transforming growth factor-beta-induced protein ig-h3
NaN	NaN	NaN	NaN	21.4684	NaN	NaN	NaN	17	1909.02	7.63e-67	203.99	ALEIFKQASAFSRASQR	Q15582	Q15582	TGFBI	Transforming growth factor-beta-induced protein ig-h3
20.9889	NaN	NaN	NaN	NaN	NaN	NaN	NaN	14	1629.74	0.1345	58.37	ALEKDYEEVGIDSY	P68366;P68366-2	P68366	TUBA4A	Tubulin alpha-4A chain
NaN	NaN	23.229	NaN	NaN	NaN	NaN	NaN	10	1136.59	0.097398	74.165	ALELAHERQA	Q9HB14	Q9HB14	KCNK13	Potassium channel subfamily K member 13
NaN	NaN	NaN	NaN	NaN	NaN	NaN	NaN	16	1841.97	0.15565	48.44	ALELMVLNVPRLMTQD	P08709;P08709-2	P08709	F7	Coagulation factor VII;Factor VII light chain;Factor VII heavy chain
NaN	NaN	NaN	NaN	NaN	NaN	NaN	NaN	17	1767.99	0.013089	82.259	ALESPERPFLAILGGAK	P00558;P00558-2	P00558	PGK1	Phosphoglycerate kinase 1
NaN	NaN	NaN	20.0851	NaN	NaN	NaN	NaN	15	1716.88	0.01926	93.959	ALFEEVPELLTEAEK	P31939;P31939-2	P31939	ATIC	Bifunctional purine biosynthesis protein PURH;Phosphoribosylaminoimidazolecarboxamide formyltransferase;IMP cyclohydrolase
NaN	NaN	NaN	NaN	NaN	NaN	22.5563	NaN	16	1907.02	0.050374	63.29	ALGRWHRVSAERLNKD	P98160	P98160	HSPG2	Basement membrane-specific heparan sulfate proteoglycan core protein;Endorepellin;LG3 peptide
NaN	NaN	NaN	NaN	NaN	NaN	23.0155	NaN	17	1964.05	0.0020718	106.38	ALGRWHRVSAERLNKDG	P98160	P98160	HSPG2	Basement membrane-specific heparan sulfate proteoglycan core protein;Endorepellin;LG3 peptide
21.3492	23.6946	NaN	NaN	NaN	NaN	NaN	NaN	8	767.418	0.091485	92.692	ALGSLPPN	O94916;O94916-2;O94916-4;O94916-5	O94916	NFAT5	Nuclear factor of activated T-cells 5
NaN	NaN	NaN	NaN	NaN	NaN	NaN	NaN	16	1803.04	0.022322	77.078	ALIIPALLEIVIFYSE	Q495N2-3;Q495N2-2;Q495N2	Q495N2-3	SLC36A3	Proton-coupled amino acid transporter 3
NaN	NaN	NaN	NaN	NaN	NaN	NaN	NaN	9	981.524	0.0049011	112.17	ALISNSHQL	O75444;O75444-1	O75444	MAF	Transcription factor Maf
NaN	NaN	NaN	NaN	NaN	NaN	20.3087	24.536	15	1518.84	6.67e-05	137.89	ALKDIVINANPASPP	Q13155	Q13155	AIMP2	Aminoacyl tRNA synthase complex-interacting multifunctional protein 2
23.6307	NaN	NaN	NaN	NaN	NaN	NaN	NaN	17	2085.23	0.010765	72.433	ALKEPPRDRKKQKNIKH	P30050;P30050-2	P30050	RPL12	60S ribosomal protein L12
NaN	NaN	22.2806	22.7953	NaN	NaN	NaN	NaN	8	799.517	0.12128	81.32	ALKISGVI	P07942	P07942	LAMB1	Laminin subunit beta-1
NaN	24.1204	NaN	NaN	NaN	NaN	NaN	NaN	9	934.571	0.13494	60.961	ALLARHAAL	Q9H254;Q9H254-2;Q9H254-4	Q9H254	SPTBN4	Spectrin beta chain, non-erythrocytic 4
NaN	NaN	23.9505	NaN	NaN	NaN	NaN	NaN	8	881.533	0.11207	83.614	ALLPAREL	O95359;O95359-3	O95359	TACC2	Transforming acidic coiled-coil-containing protein 2
NaN	NaN	NaN	NaN	NaN	NaN	NaN	NaN	18	1911	4.94e-08	179.93	ALLSPYSYSTTAVVTNPK	P02766	P02766	TTR	Transthyretin
NaN	NaN	NaN	NaN	NaN	NaN	NaN	NaN	9	974.511	0.058213	79.713	ALMDEVVKA	P00558;P00558-2	P00558	PGK1	Phosphoglycerate kinase 1
NaN	NaN	NaN	NaN	NaN	NaN	NaN	NaN	21	2112.13	5.27e-05	109.5	ALMLQGVDLLADAVAVTMGPK	P10809;P10809-2	P10809	HSPD1	60 kDa heat shock protein, mitochondrial
NaN	NaN	21.0161	NaN	NaN	NaN	NaN	NaN	9	967.618	0.073474	81.784	ALNAVRLLV	O14745	O14745	SLC9A3R1	Na(+)/H(+) exchange regulatory cofactor NHE-RF1
NaN	NaN	NaN	NaN	NaN	NaN	NaN	NaN	15	1758.95	0.0042154	112.02	ALNNFQAVQRRVSEK	Q86Y82	Q86Y82	STX12	Syntaxin-12
NaN	NaN	NaN	NaN	23.5218	NaN	NaN	NaN	14	1590.82	0.17023	36.519	ALPEFDGKRFQNVA	P14625;Q58FF3	P14625	HSP90B1;HSP90B2P	Endoplasmin;Putative endoplasmin-like protein
NaN	NaN	NaN	NaN	29.083	NaN	NaN	NaN	15	1718.91	4.01e-10	171.32	ALPEFDGKRFQNVAK	P14625;Q58FF3	P14625	HSP90B1;HSP90B2P	Endoplasmin;Putative endoplasmin-like protein
NaN	NaN	NaN	NaN	28.804	NaN	NaN	NaN	16	1847.95	0.0044962	99.451	ALPEFDGKRFQNVAKE	P14625;Q58FF3	P14625	HSP90B1;HSP90B2P	Endoplasmin;Putative endoplasmin-like protein
NaN	NaN	NaN	NaN	30.2224	NaN	NaN	NaN	17	1904.97	0.0014628	117.08	ALPEFDGKRFQNVAKEG	P14625;Q58FF3	P14625	HSP90B1;HSP90B2P	Endoplasmin;Putative endoplasmin-like protein
NaN	NaN	22.7531	20.5561	NaN	NaN	NaN	NaN	9	959.555	0.033437	94.302	ALPGAFKTR	P35579;P35579-2	P35579	MYH9	Myosin-9
NaN	NaN	NaN	NaN	NaN	NaN	NaN	NaN	8	889.55	0.088958	89.903	ALPHAILR	P60709;P63261;Q562R1	P60709	ACTB;ACTG1;ACTBL2	Actin, cytoplasmic 1;Actin, cytoplasmic 1, N-terminally processed;Actin, cytoplasmic 2;Actin, cytoplasmic 2, N-terminally processed;Beta-actin-like protein 2
20.9454	23.6031	NaN	NaN	NaN	NaN	NaN	NaN	9	1037.64	0.042339	87.323	ALPPKPRFL	O75362	O75362	ZNF217	Zinc finger protein 217
NaN	NaN	NaN	NaN	NaN	NaN	NaN	NaN	9	972.564	0.10735	65.252	ALPSKLPTF	Q14258	Q14258	TRIM25	E3 ubiquitin/ISG15 ligase TRIM25
NaN	22.2913	NaN	NaN	NaN	NaN	NaN	NaN	8	855.507	0.12541	80.294	ALQEALVL	P19971;P19971-2	P19971	TYMP	Thymidine phosphorylase
NaN	NaN	NaN	NaN	NaN	NaN	NaN	NaN	9	1114.6	0.061281	64.04	ALQLEEERK	P15311	P15311	EZR	Ezrin
NaN	NaN	NaN	NaN	NaN	NaN	21.3357	NaN	15	1424.8	0.029045	74.53	ALQNIIPASTGAAKA	P04406;P04406-2	P04406	GAPDH	Glyceraldehyde-3-phosphate dehydrogenase
25.0311	NaN	NaN	NaN	NaN	NaN	NaN	NaN	9	902.482	0.0089747	171.38	ALRASESGI	P48960;P48960-2;P48960-3	P48960	CD97	CD97 antigen;CD97 antigen subunit alpha;CD97 antigen subunit beta
NaN	NaN	NaN	NaN	NaN	25.7174	22.5519	NaN	18	2184.26	0.11151	42.277	ALRDKLMSQQKDALRKRK	Q9P267;Q9P267-2	Q9P267	MBD5	Methyl-CpG-binding domain protein 5
NaN	NaN	NaN	NaN	20.4851	NaN	NaN	NaN	15	1624.97	0.28237	37.092	ALRGLFIIDPNGVIK	P30048;P30048-2	P30048	PRDX3	Thioredoxin-dependent peroxide reductase, mitochondrial
NaN	NaN	NaN	NaN	NaN	NaN	23.0531	NaN	15	1615.03	0.010099	96.464	ALRGLLPVLGQPIIR	Q13421;Q13421-4;Q13421-3;Q13421-2	Q13421	MSLN	Mesothelin;Megakaryocyte-potentiating factor;Mesothelin, cleaved form
NaN	NaN	NaN	NaN	NaN	NaN	20.95	NaN	16	1702.06	0.046149	47.548	ALRGLLPVLGQPIIRS	Q13421;Q13421-4;Q13421-3;Q13421-2	Q13421	MSLN	Mesothelin;Megakaryocyte-potentiating factor;Mesothelin, cleaved form
21.9711	NaN	NaN	NaN	NaN	NaN	NaN	NaN	11	1249.68	0.0035747	101.54	ALRPSTSRSLY	P08670	P08670	VIM	Vimentin
NaN	NaN	NaN	NaN	20.8864	NaN	NaN	NaN	15	1896.06	0.0034419	115.68	ALRRYVRAENKDRLH	Q06481;Q06481-5;Q06481-4;Q06481-2;Q06481-3;Q06481-6	Q06481	APLP2	Amyloid-like protein 2
NaN	NaN	NaN	NaN	26.168	25.0134	NaN	NaN	16	1997.1	1.28e-15	176.25	ALRRYVRAENKDRLHT	Q06481;Q06481-5;Q06481-4;Q06481-2;Q06481-3;Q06481-6	Q06481	APLP2	Amyloid-like protein 2
NaN	NaN	NaN	NaN	NaN	NaN	NaN	NaN	19	1939.1	0.048733	57.499	ALSALLDSAEKLAPGKKVE	Q8N2C7-7;Q8N2C7;Q8N2C7-2;Q8N2C7-4	Q8N2C7-7	UNC80	Protein unc-80 homolog
NaN	NaN	NaN	NaN	NaN	NaN	NaN	NaN	9	1067.54	0.021953	103.29	ALSDHHIYL	P04075;P04075-2	P04075	ALDOA	Fructose-bisphosphate aldolase A
NaN	NaN	NaN	NaN	NaN	NaN	NaN	NaN	9	941.482	0.083049	83.614	ALSDSIHTV	Q9UKN5	Q9UKN5	PRDM4	PR domain zinc finger protein 4
NaN	NaN	NaN	NaN	NaN	NaN	NaN	NaN	9	996.51	0.0092016	124.08	ALSSQHQAR	P11021	P11021	HSPA5	78 kDa glucose-regulated protein
NaN	NaN	NaN	22.4616	NaN	NaN	NaN	NaN	9	973.556	0.13778	68.224	ALSTIVSQR	Q5EE01;Q5EE01-2	Q5EE01	CENPW	Centromere protein W
NaN	NaN	NaN	NaN	NaN	NaN	NaN	NaN	25	2754.4	0.20611	45.395	ALSVTMSYLEIYQEKVLDLLDPASG	Q14807;Q14807-2	Q14807	KIF22	Kinesin-like protein KIF22
NaN	NaN	NaN	NaN	NaN	NaN	NaN	NaN	9	911.533	0.064769	76.847	ALTLLGEVP	Q969P6	Q969P6	TOP1MT	DNA topoisomerase I, mitochondrial
NaN	NaN	NaN	NaN	NaN	NaN	NaN	NaN	13	1423.71	0.055704	78.334	ALTMLSRENVGYA	O00400	O00400	SLC33A1	Acetyl-coenzyme A transporter 1
NaN	NaN	NaN	NaN	NaN	NaN	NaN	NaN	11	1107.6	0.099761	78.516	ALTQTGGPHVK	P21333;P21333-2	P21333	FLNA	Filamin-A
NaN	NaN	NaN	NaN	NaN	NaN	NaN	NaN	15	1658.89	0.00091035	124.42	ALTVPELTQQVFDAK	P07437	P07437	TUBB	Tubulin beta chain
NaN	NaN	NaN	NaN	NaN	NaN	NaN	NaN	9	898.512	0.028091	97.596	ALVVQVAEA	P07686	P07686	HEXB	Beta-hexosaminidase subunit beta;Beta-hexosaminidase subunit beta chain B;Beta-hexosaminidase subunit beta chain A
NaN	NaN	NaN	NaN	21.1459	NaN	NaN	NaN	16	1905.99	0.10968	37.77	ALWVLARRCYTLQAEN	Q9UFD9	Q9UFD9	RIMBP3	RIMS-binding protein 3A
21.2632	NaN	NaN	NaN	NaN	NaN	NaN	NaN	10	1173.56	0.019272	112.84	ALYDATYETK	P23528;Q9Y281;Q9Y281-3	P23528	CFL1;CFL2	Cofilin-1;Cofilin-2
21.0363	NaN	NaN	NaN	NaN	NaN	NaN	NaN	12	1431.83	0.11311	65.395	ALYKGKKERPRS	P62266	P62266	RPS23	40S ribosomal protein S23
NaN	NaN	NaN	NaN	NaN	NaN	NaN	NaN	9	941.537	0.085062	70.912	AMAKPQVVV	Q9H074;Q9H074-2	Q9H074	PAIP1	Polyadenylate-binding protein-interacting protein 1
23.1676	NaN	NaN	NaN	NaN	NaN	NaN	NaN	9	914.453	0.021487	107.67	AMAPTSPQI	Q9BYD2	Q9BYD2	MRPL9	39S ribosomal protein L9, mitochondrial
NaN	NaN	25.6376	24.973	NaN	NaN	NaN	NaN	9	932.511	0.005004	151.29	AMATVTALR	P04075;P04075-2;P09972	P04075	ALDOA;ALDOC	Fructose-bisphosphate aldolase A;Fructose-bisphosphate aldolase C
24.3238	26.7899	23.8944	27.4456	NaN	NaN	NaN	NaN	9	967.432	0.020891	104.45	AMDPVSVSY	P57682;P57682-2	P57682	KLF3	Krueppel-like factor 3
NaN	NaN	21.814	23.0213	NaN	NaN	NaN	NaN	9	1115.53	0.088509	69.905	AMDVYKNLY	P60228	P60228	EIF3E	Eukaryotic translation initiation factor 3 subunit E
NaN	NaN	NaN	NaN	NaN	NaN	NaN	NaN	11	1342.59	1	NaN	AMFDQSQIQEF	O14950;P19105;P24844-2;P24844	O14950	MYL12B;MYL12A;MYL9	Myosin regulatory light chain 12B;Myosin regulatory light chain 12A;Myosin regulatory light polypeptide 9
23.0296	24.4984	NaN	NaN	NaN	NaN	NaN	NaN	9	1010.53	0.028625	98.009	AMFGKLMTI	Q29RF7;Q29RF7-3	Q29RF7	PDS5A	Sister chromatid cohesion protein PDS5 homolog A
21.0389	NaN	NaN	NaN	NaN	NaN	NaN	NaN	15	1742.81	3.95e-08	158.31	AMGIMNSFVNDIFER	P62807;O60814;P57053;Q99877;Q99879;Q16778;P06899;P33778;P58876;Q93079;Q5QNW6;Q5QNW6-2;Q99880	P62807	HIST1H2BC;HIST1H2BK;H2BFS;HIST1H2BN;HIST1H2BM;HIST2H2BE;HIST1H2BJ;HIST1H2BB;HIST1H2BD;HIST1H2BH;HIST2H2BF;HIST1H2BL	Histone H2B type 1-C/E/F/G/I;Histone H2B type 1-K;Histone H2B type F-S;Histone H2B type 1-N;Histone H2B type 1-M;Histone H2B type 2-E;Histone H2B type 1-J;Histone H2B type 1-B;Histone H2B type 1-D;Histone H2B type 1-H;Histone H2B type 2-F;Histone H2B type 1-L
24.9851	27.0651	NaN	NaN	NaN	NaN	NaN	NaN	8	858.5	0.022188	141.98	AMIKGLQV	Q96F07;Q96F07-2;Q7L576	Q7L576	CYFIP2;CYFIP1	Cytoplasmic FMR1-interacting protein 2;Cytoplasmic FMR1-interacting protein 1
21.41	NaN	NaN	NaN	NaN	NaN	NaN	NaN	8	889.422	0.036125	129.56	AMKEDPTV	P78417;P78417-2;P78417-3	P78417	GSTO1	Glutathione S-transferase omega-1
NaN	NaN	NaN	NaN	NaN	NaN	NaN	NaN	9	1003.53	0.064769	76.847	AMLGVNPRF	Q96S52;Q96S52-2	Q96S52	PIGS	GPI transamidase component PIG-S
NaN	NaN	NaN	NaN	NaN	NaN	NaN	20.9088	14	1519.74	1.76e-22	202.44	AMLMAVQLLDSSNQ	Q14624;Q14624-2;Q14624-4;Q14624-3	Q14624	ITIH4	Inter-alpha-trypsin inhibitor heavy chain H4;70 kDa inter-alpha-trypsin inhibitor heavy chain H4;35 kDa inter-alpha-trypsin inhibitor heavy chain H4
NaN	NaN	NaN	NaN	NaN	NaN	NaN	NaN	17	2015.07	0.15075	49.343	AMNEIRAKKRLRQSGEE	O75391	O75391	SPAG7	Sperm-associated antigen 7
31.4161	30.9703	NaN	23.54	NaN	NaN	NaN	NaN	9	1040.47	0.01373	133.81	AMNPVEHPF	P62917	P62917	RPL8	60S ribosomal protein L8
NaN	NaN	25.7307	23.5879	NaN	NaN	NaN	NaN	9	1003.5	0.0087565	130.04	AMNSQILEV	O60281;O60281-2	O60281	ZNF292	Zinc finger protein 292
20.9107	NaN	NaN	NaN	NaN	NaN	NaN	NaN	8	858.5	0.068216	103.29	AMQKGLIV	Q15149;Q15149-4;Q15149-2;Q15149-6;Q15149-9;Q15149-7;Q15149-8;Q15149-5;Q15149-3;P58107	Q15149	PLEC;EPPK1	Plectin;Epiplakin
22.3473	NaN	NaN	NaN	NaN	NaN	NaN	NaN	8	931.491	0.051163	117.18	AMRQVNTI	Q96NB3	Q96NB3	ZNF830	Zinc finger protein 830
25.5158	NaN	NaN	NaN	NaN	NaN	NaN	NaN	9	918.459	0.017607	119.17	AMSARAEAI	P47914	P47914	RPL29	60S ribosomal protein L29
23.2796	24.2477	NaN	NaN	NaN	NaN	NaN	NaN	9	930.448	0.035805	91.9	AMVDPAQTV	P50416;P50416-2	P50416	CPT1A	Carnitine O-palmitoyltransferase 1, liver isoform
22.9247	25.3519	NaN	NaN	NaN	NaN	NaN	NaN	8	873.511	0.0023831	179.16	AMVRVISV	Q6P2E9	Q6P2E9	EDC4	Enhancer of mRNA-decapping protein 4
22.5762	NaN	NaN	NaN	NaN	NaN	NaN	NaN	9	1089.6	0.11172	45.335	AMYKKSLHI	O94804	O94804	STK10	Serine/threonine-protein kinase 10
20.629	NaN	NaN	NaN	NaN	NaN	NaN	NaN	13	1530.83	0.0068148	89.46	AMYKRKYSAAKSK	Q02878	Q02878	RPL6	60S ribosomal protein L6
NaN	21.6152	NaN	NaN	NaN	NaN	NaN	NaN	8	982.531	0.13962	76.847	AMYPFKKV	Q9NZV5;Q9NZV5-2	Q9NZV5	SEPN1	Selenoprotein N
NaN	NaN	27.349	24.8846	NaN	NaN	NaN	NaN	9	854.486	0.01016	120.49	ANAASPLIV	Q5JPE7;Q15155;P69849;Q5JPE7-2;Q5JPE7-3	Q5JPE7	NOMO2;NOMO1;NOMO3	Nodal modulator 2;Nodal modulator 1;Nodal modulator 3
NaN	NaN	22.6691	NaN	NaN	NaN	NaN	NaN	8	855.493	0.11371	83.206	ANAIPSKR	Q63HN8-4	Q63HN8-4	RNF213	E3 ubiquitin-protein ligase RNF213
NaN	NaN	NaN	NaN	NaN	NaN	NaN	NaN	9	1009.59	0.063187	71.877	ANDIPRILV	Q9H082	Q9H082	RAB33B	Ras-related protein Rab-33B
NaN	NaN	NaN	NaN	NaN	NaN	NaN	NaN	15	1780.05	0.011901	78.505	ANDLKLLRHHLQIPI	Q9Y2Q3;Q9Y2Q3-3;Q9Y2Q3-2	Q9Y2Q3	GSTK1	Glutathione S-transferase kappa 1
NaN	NaN	NaN	NaN	20.6577	NaN	NaN	NaN	16	1754.02	0.34726	21.314	ANKALDKARAKNKDVL	Q9UNH7;Q9UNH7-2	Q9UNH7	SNX6	Sorting nexin-6;Sorting nexin-6, N-terminally processed
NaN	NaN	NaN	24.3113	NaN	NaN	NaN	24.2753	16	1659.85	1.43e-12	164.9	ANKVDLSFSPSQSLPA	P01023	P01023	A2M	Alpha-2-macroglobulin
NaN	NaN	NaN	22.9323	NaN	NaN	NaN	22.4349	17	1746.88	3.02e-08	196.11	ANKVDLSFSPSQSLPAS	P01023	P01023	A2M	Alpha-2-macroglobulin
NaN	NaN	NaN	NaN	NaN	NaN	21.6592	18.4676	20	2295.13	0.26532	43.208	ANLHHFNLGRRIPGFDYGPD	P98153;P98153-2	P98153	DGCR2	Integral membrane protein DGCR2/IDD
22.0483	NaN	NaN	NaN	NaN	NaN	NaN	NaN	8	955.581	0.13402	70.525	ANLKLIRE	Q9P2P6	Q9P2P6	STARD9	StAR-related lipid transfer protein 9
NaN	NaN	NaN	21.3621	NaN	NaN	NaN	NaN	9	954.55	0.07779	73.039	ANLNLVQAL	Q9UIA0	Q9UIA0	CYTH4	Cytohesin-4
NaN	NaN	NaN	NaN	NaN	NaN	NaN	NaN	13	1433.72	0.0065435	138.25	ANLPQSFQVDTSK	P21333;P21333-2	P21333	FLNA	Filamin-A
[truncated: 30,298 more rows]
