# Supplementary material
Source: HighWire-hosted journal article supplement (https://jitc.bmj.com/content/8/2/e000875)
Supplement: inline-supplementary-material-7 [file inline-supplementary-material-7.xlsx]

## Sheet: Feuil1
ENSEMBL_ID	GENE_NAME	Patient_1_tumor	Patient_1_CD14+	Patient_2_tumor	Patient_2_CD14
ENSG00000183067.5_2	IGSF5	0.2639	0	0	0
ENSG00000205362.11_4	MT1A	0.4718	0	8.3763	8.7994
ENSG00000225526.4_4	MKRN2OS	0.4762	0	1.4301	0.3628
ENSG00000174015.10_5	SPERT	0.1001	0	0.5432	0.2181
ENSG00000183251.4_5	OR51B4	0.1001	0	0	0.0661
ENSG00000124302.13_5	CHST8	0.1	0	0.0473	0
ENSG00000206052.11_4	DOK6	12.246	0	0.1629	0.0609
ENSG00000183775.11_4	KCTD16	0.0999	0	0.0195	0.0022
ENSG00000143631.10_2	FLG	0.4763	0	0.0614	0.0314
ENSG00000237136.7_3	C4orf51	0.0998	0	0.066	0
ENSG00000095627.9_2	TDRD1	0.0997	0	0.0101	0.0455
ENSG00000102290.22_3	PCDH11X	0.0995	0	0	0
ENSG00000197233.7_2	OR1J2	0.0992	0	0.1312	0.1637
ENSG00000165188.13_2	RNF183	2.3106	0	3.8584	0.8354
ENSG00000204571.6_4	KRTAP5-11	0.0992	0	0	0
ENSG00000018625.15_3	ATP1A2	3.1669	0	0.0878	0.0328
ENSG00000231738.11_3	TSPAN19	0.4776	0	0	0
ENSG00000239590.1_3	OR1J4	0.0992	0	0.0437	0.0982
ENSG00000172031.7_3	EPHX4	3.1674	0	2.1972	0.2277
ENSG00000284862.3_5	CCDC39	0.0991	0	0	0
ENSG00000171462.15_5	DLK2	0.479	0	0.383	0.1581
ENSG00000187288.10_2	CIDEC	4.7284	0	0.0191	0.0286
ENSG00000127743.6_3	IL17B	0.099	0	0	0
ENSG00000132911.4_2	NMUR2	0.099	0	0	0
ENSG00000188293.6_3	IGFL1	0.4797	0	1.005	0.0396
ENSG00000174808.12_3	BTC	2.3002	0	8.5656	1.5437
ENSG00000137077.8_5	CCL21	2.2971	0	0.0281	0
ENSG00000147041.12_5	SYTL5	0.0988	0	1.1635	0.0848
ENSG00000164129.12_3	NPY5R	0.0989	0	0.0327	0
ENSG00000133665.13_5	DYDC2	0.4843	0	1.5784	0.2842
ENSG00000182631.7_4	RXFP3	0.0983	0	0	0
ENSG00000184908.17_2	CLCNKB	0.4749	0	5.5097	1.0413
ENSG00000114200.10_4	BCHE	2.3175	0	0.4883	0.0256
ENSG00000154227.13_4	CERS3	0.5261	0	0	0.0651
ENSG00000134115.13_3	CNTN6	0.1006	0	0	0.0125
ENSG00000269190.6_5	FBXO17	7.1193	0	11.1657	2.3027
ENSG00000215182.6	MUC5AC	0.4548	0	0	0
ENSG00000204616.11_3	TRIM31	0.4572	0	0.0672	0.5534
ENSG00000163075.13_4	CFAP221	3.1578	0	0.767	0.1188
ENSG00000183150.8_5	GPR19	0.4579	0	5.2517	0.9825
ENSG00000167104.11_3	BPIFB6	0.1027	0	0	0
ENSG00000183054.11_4	RGPD6	0.1028	0	0.034	0
ENSG00000183691.5_3	NOG	0.4589	0	0.3036	0.0162
ENSG00000177519.4_4	RPRM	0.4589	0	0.2747	0.1298
ENSG00000179796.12_6	LRRC3B	0.4617	0	0.1063	0.0596
ENSG00000096006.11_2	CRISP3	0.1024	0	5.2285	3.5277
ENSG00000188306.6_2	LRRIQ4	0.1023	0	0.0564	0.1013
ENSG00000167749.11_2	KLK4	0.4635	0	0.0279	0
ENSG00000109182.12_3	CWH43	0.1021	0	0.7816	0.2455
ENSG00000143858.12_3	SYT2	0.1021	0	0.0351	0.0081
ENSG00000249853.7_5	HS3ST5	0.1021	0	0.015	0.0112
ENSG00000006377.11_3	DLX6	0.4636	0	0.2684	0.0765
ENSG00000171004.18_4	HS6ST2	0.4643	0	0.6911	0.0821
ENSG00000123119.12_3	NECAB1	0.4654	0	0.6998	0.2095
ENSG00000229314.5_2	ORM1	0.1018	0	0.101	0
ENSG00000089225.19_2	TBX5	0.4664	0	0.0094	0
ENSG00000153002.12_6	CPB1	0.4671	0	0.4464	0.1028
ENSG00000283324.1_5	CTXND2	0.1013	0	0	0
ENSG00000112559.14_3	MDFI	74.5007	0	9.2316	0.4825
ENSG00000180083.11_3	WFDC11	0.1013	0	0.067	0
ENSG00000173156.7_3	RHOD	12.2586	0	28.919	4.0979
ENSG00000120729.9_2	MYOT	0.1008	0	0	0
ENSG00000005981.13_3	ASB4	0.1006	0	0.04	0
ENSG00000204963.4	PCDHA7	0.4676	0	0.3636	0.0894
ENSG00000133488.15_3	SEC14L4	0.0982	0	4.2635	0.8508
ENSG00000184995.7_3	IFNE	0.4855	0	0.447	0.2091
ENSG00000179934.7_3	CCR8	0.4862	0	0	0.0241
ENSG00000139610.2_3	CELA1	0.098	0	0	0.0324
ENSG00000206432.4_2	TMEM200C	0.5058	0	0.0689	0.0196
ENSG00000160870.14_5	CYP3A7	0.0914	0	0	0
ENSG00000185662.9_5	SMIM23	0.0913	0	0	0
ENSG00000272414.6_8	FAM47E-STBD1	0.0913	0	0	0.0129
ENSG00000184702.20_8	SEPTIN5	0.5059	0	0.3719	0.1113
ENSG00000128610.12_4	FEZF1	0.091	0	0	0
ENSG00000261949.5_2	GFY	0.0907	0	0	0
ENSG00000204618.8_3	RNF39	0.507	0	0.2565	0.0295
ENSG00000130173.13_7	ANGPTL8	0.0905	0	0.3593	0
ENSG00000166342.19_6	NETO1	2.2772	0	0	0
ENSG00000174697.5_3	LEP	0.5088	0	0	0.189
ENSG00000156486.8_6	KCNS2	0.0906	0	0.2568	0.1537
ENSG00000186973.11_3	FAM183A	0.5105	0	1.1399	0.6319
ENSG00000007062.11_5	PROM1	2.2759	0	7.4265	1.7416
ENSG00000213996.13_4	TM6SF2	0.5128	0	0.0814	0.0406
ENSG00000160862.13_6	AZGP1	3.2254	0	0	0.0819
ENSG00000167355.8_5	OR51B5	0.5159	0	0.0201	0.1202
ENSG00000122584.13_3	NXPH1	0.0899	0	0.1388	0.1781
ENSG00000169100.14_3	SLC25A6	151.78	0	142.112	0
ENSG00000169100.14_3	SLC25A6	151.78	0	142.112	0
ENSG00000169100.14_3	SLC25A6	151.78	0	142.112	149.045
ENSG00000169100.14_3	SLC25A6	151.78	0	142.112	149.045
ENSG00000169100.14_3	SLC25A6	151.78	0	0	149.045
ENSG00000169100.14_3	SLC25A6	151.78	0	0	149.045
ENSG00000169100.14_3	SLC25A6	151.78	0	0	0
ENSG00000169100.14_3	SLC25A6	151.78	0	0	0
ENSG00000169100.14_3	SLC25A6	151.78	205.972	142.112	0
ENSG00000169100.14_3	SLC25A6	151.78	205.972	142.112	0
ENSG00000169100.14_3	SLC25A6	151.78	205.972	142.112	149.045
ENSG00000169100.14_3	SLC25A6	151.78	205.972	142.112	149.045
ENSG00000169100.14_3	SLC25A6	151.78	205.972	0	149.045
ENSG00000169100.14_3	SLC25A6	151.78	205.972	0	149.045
ENSG00000169100.14_3	SLC25A6	151.78	205.972	0	0
ENSG00000169100.14_3	SLC25A6	151.78	205.972	0	0
ENSG00000169100.14_3_PAR_Y	SLC25A6	0	205.972	142.112	0
ENSG00000169100.14_3_PAR_Y	SLC25A6	0	205.972	142.112	0
ENSG00000169100.14_3_PAR_Y	SLC25A6	0	205.972	142.112	149.045
ENSG00000169100.14_3_PAR_Y	SLC25A6	0	205.972	142.112	149.045
ENSG00000169100.14_3_PAR_Y	SLC25A6	0	205.972	0	149.045
ENSG00000169100.14_3_PAR_Y	SLC25A6	0	205.972	0	149.045
ENSG00000169100.14_3_PAR_Y	SLC25A6	0	205.972	0	0
ENSG00000169100.14_3_PAR_Y	SLC25A6	0	205.972	0	0
ENSG00000169100.14_3_PAR_Y	SLC25A6	0	0	142.112	0
ENSG00000169100.14_3_PAR_Y	SLC25A6	0	0	142.112	0
ENSG00000169100.14_3_PAR_Y	SLC25A6	0	0	142.112	149.045
ENSG00000169100.14_3_PAR_Y	SLC25A6	0	0	142.112	149.045
ENSG00000169100.14_3_PAR_Y	SLC25A6	0	0	0	149.045
ENSG00000169100.14_3_PAR_Y	SLC25A6	0	0	0	149.045
ENSG00000169100.14_3_PAR_Y	SLC25A6	0	0	0	0
ENSG00000169100.14_3_PAR_Y	SLC25A6	0	0	0	0
ENSG00000163121.10_3	NEURL3	0.517	0	0.1316	0.0197
ENSG00000198049.7_3	AVPR1B	0.0894	0	0.0148	0
ENSG00000162399.9_6	BSND	0.0893	0	0.8401	0.1169
ENSG00000205693.3_2	MANSC4	0.5174	0	0	0
ENSG00000176887.7_5	SOX11	0.5189	0	0.2746	0.0548
ENSG00000203805.10_2	PLPP4	15.6615	0	0.3672	0.6412
ENSG00000187123.15_5	LYPD6	3.249	0	16.1878	3.3903
ENSG00000175161.13_4	CADM2	0.5213	0	0.2665	0.0469
ENSG00000171201.11_3	SMR3B	0.0885	0	0	0
ENSG00000139194.8_3	RBP5	4.748	0	1.6438	0.4921
ENSG00000274588.2_3	DGKK	0.0914	0	0	0
ENSG00000183423.12_4	LRIT3	0.092	0	0.0831	0.0331
ENSG00000182255.7_3	KCNA4	0.092	0	0.0783	0.026
ENSG00000185149.6_3	NPY2R	0.096	0	0.0462	0.0086
ENSG00000136839.1_3	OR13C9	0.0976	0	0	0
ENSG00000188993.3_2	LRRC66	0.4867	0	0.0743	0.0834
ENSG00000178115.11_3	GOLGA8Q	0.0976	0	0.0161	0.0483
ENSG00000108839.12_4	ALOX12	0.487	0	0.1611	0
ENSG00000184343.11_4	SRPK3	8.8178	0	4.2049	0.5458
ENSG00000185028.4_3	LRRC14B	0.0969	0	0.1523	0.108
ENSG00000139915.20_8	MDGA2	0.4887	0	0.7699	0.2305
ENSG00000196408.11_3	NOXO1	0.4899	0	0.5583	0.027
ENSG00000260851.6_6	AC010542.3	0.0967	0	0	0.3352
ENSG00000206262.9_3	FOXL2NB	0.4908	0	0.0361	0
ENSG00000166220.12_2	TBATA	0.4918	0	0	0
ENSG00000124196.6_3	GTSF1L	0.096	0	0	0
ENSG00000071991.9_3	CDH19	0.4917	0	0	0
ENSG00000183644.13_5	C11orf88	0.4956	0	0.0546	0
ENSG00000283683.1_5	MYOCOS	0.5053	0	1.7673	0.3575
ENSG00000149534.9_3	MS4A2	2.2896	0	0.0267	0.0267
ENSG00000163736.4_3	PPBP	0.0953	0	0.1103	0.0236
ENSG00000258713.2_3	C20orf141	0.0951	0	0.8178	0.2825
ENSG00000151778.11_3	SERP2	2.2861	0	0.7563	0.1952
ENSG00000284680.1_2	OR8B2	0.0935	0	0	0
ENSG00000198570.5_2	RD3	0.0934	0	0	0
ENSG00000205669.4_5	ACOT6	0.093	0	0.041	0
ENSG00000139767.10_5	SRRM4	0.5022	0	0.0906	0
ENSG00000141639.12_4	MAPK4	0.0924	0	0.0611	0
ENSG00000027644.5_3	INSRR	0.503	0	0.0119	0.0059
ENSG00000154529.10	CNTNAP3B	0.503	0	0.0666	0.0249
ENSG00000130675.15_5	MNX1	0.5034	0	0	0
ENSG00000204572.10_3	KRTAP5-10	0.5044	0	0.1229	0.1052
ENSG00000233198.3_2	RNF224	0.1039	0	0.9511	0.1887
ENSG00000100121.13_4	GGTLC2	0.1044	0	0	0
ENSG00000179023.8_2	KLHDC7A	0.4539	0	0.1241	0.006
ENSG00000053702.15_3	NRIP2	4.6364	0	0.0349	0
ENSG00000165084.16_5	C8orf34	0.4124	0	1.2767	0.3355
ENSG00000122375.12_4	OPN4	0.1176	0	0	0
ENSG00000160097.18_5	FNDC5	4.0505	0	1.1725	0.2507
ENSG00000176563.10_4	CNTD1	0.4133	0	0.0684	0
ENSG00000204909.8_3	SPINK9	0.1175	0	0.2721	0.0582
ENSG00000074211.14_3	PPP2R2C	7.2422	0	6.4007	0.693
ENSG00000203499.11_7	IQANK1	12.5621	0	55.6183	11.823
ENSG00000142623.11_4	PADI1	0.1162	0	0.7995	0.0115
ENSG00000166396.13_4	SERPINB7	0.415	0	0.2746	0.0316
ENSG00000151812.15_4	SLC35F4	0.1162	0	0.0192	0
ENSG00000227471.9_3	AKR1B15	0.1158	0	0	0
ENSG00000124205.18_5	EDN3	0.1156	0	0.034	0
ENSG00000167165.19_6	UGT1A6	0.1156	0	0.1785	0.0763
ENSG00000285382.1_2	FO393400.1	0.1155	0	0.0556	0.0416
ENSG00000221946.7_3	FXYD7	0.4158	0	0.5808	0.2745
ENSG00000181961.4_3	OR4A16	0.1152	0	0	0
ENSG00000126838.10_4	PZP	0.416	0	0	0
ENSG00000166959.8_6	MS4A8	0.4174	0	0	0
ENSG00000182256.13_6	GABRG3	4.6331	0	0.2762	0
ENSG00000213886.4_4	UBD	0.418	0	0	0
ENSG00000130433.7_2	CACNG6	0.1143	0	0	0
ENSG00000229676.3_3	ZNF492	0.418	0	0.7133	0.1525
ENSG00000205572.9_3	SERF1B	0.4195	0	0.1851	0.0923
ENSG00000173557.15_4	FAM166C	0.4202	0	0.7785	0.2913
ENSG00000250423.2_2	KIAA1210	7.2233	0	0.0158	0.0079
ENSG00000179813.7_3	FAM216B	0.1137	0	0	0
ENSG00000165376.10_3	CLDN2	0.4209	0	0.0279	0.0313
ENSG00000186847.6_3	KRT14	3.1049	0	1.6239	0.0293
ENSG00000139330.5_2	KERA	2.4052	0	0.0191	0
ENSG00000175877.4_6	TMEM270	0.4124	0	0.1819	0
ENSG00000186895.4_5	FGF3	0.4114	0	0	0
ENSG00000125813.13_2	PAX1	0.1178	0	0.0111	0
ENSG00000153233.13_6	PTPRR	0.404	0	2.6836	0.5601
ENSG00000122756.15_4	CNTFR	4.6106	0	0	0.0161
ENSG00000176435.7_3	CLEC14A	12.6693	0	0.0394	0
ENSG00000178343.5_3	SHISA3	0.1207	0	0.7542	0.0398
ENSG00000183346.7_6	CABCOCO1	0.1207	0	0.1278	0.0239
ENSG00000137441.8_4	FGFBP2	0.1204	0	1.2213	1.7087
ENSG00000189409.14_6	MMP23B	0.4023	0	0.1331	0.0797
ENSG00000180988.2_2	OR52N2	0.1203	0	0.0199	0.0596
ENSG00000169093.16_4	ASMTL	15.0122	0	17.1452	0
ENSG00000169093.16_4	ASMTL	15.0122	0	17.1452	0
ENSG00000169093.16_4	ASMTL	15.0122	0	17.1452	13.234
ENSG00000169093.16_4	ASMTL	15.0122	0	17.1452	13.234
ENSG00000169093.16_4	ASMTL	15.0122	0	0	13.234
ENSG00000169093.16_4	ASMTL	15.0122	0	0	13.234
ENSG00000169093.16_4	ASMTL	15.0122	0	0	0
ENSG00000169093.16_4	ASMTL	15.0122	0	0	0
ENSG00000169093.16_4	ASMTL	15.0122	23.2978	17.1452	0
ENSG00000169093.16_4	ASMTL	15.0122	23.2978	17.1452	0
ENSG00000169093.16_4	ASMTL	15.0122	23.2978	17.1452	13.234
ENSG00000169093.16_4	ASMTL	15.0122	23.2978	17.1452	13.234
ENSG00000169093.16_4	ASMTL	15.0122	23.2978	0	13.234
ENSG00000169093.16_4	ASMTL	15.0122	23.2978	0	13.234
ENSG00000169093.16_4	ASMTL	15.0122	23.2978	0	0
ENSG00000169093.16_4	ASMTL	15.0122	23.2978	0	0
ENSG00000169093.16_4_PAR_Y	ASMTL	0	23.2978	17.1452	0
ENSG00000169093.16_4_PAR_Y	ASMTL	0	23.2978	17.1452	0
ENSG00000169093.16_4_PAR_Y	ASMTL	0	23.2978	17.1452	13.234
ENSG00000169093.16_4_PAR_Y	ASMTL	0	23.2978	17.1452	13.234
ENSG00000169093.16_4_PAR_Y	ASMTL	0	23.2978	0	13.234
ENSG00000169093.16_4_PAR_Y	ASMTL	0	23.2978	0	13.234
ENSG00000169093.16_4_PAR_Y	ASMTL	0	23.2978	0	0
ENSG00000169093.16_4_PAR_Y	ASMTL	0	23.2978	0	0
ENSG00000169093.16_4_PAR_Y	ASMTL	0	0	17.1452	0
ENSG00000169093.16_4_PAR_Y	ASMTL	0	0	17.1452	0
ENSG00000169093.16_4_PAR_Y	ASMTL	0	0	17.1452	13.234
ENSG00000169093.16_4_PAR_Y	ASMTL	0	0	17.1452	13.234
ENSG00000169093.16_4_PAR_Y	ASMTL	0	0	0	13.234
ENSG00000169093.16_4_PAR_Y	ASMTL	0	0	0	13.234
ENSG00000169093.16_4_PAR_Y	ASMTL	0	0	0	0
ENSG00000169093.16_4_PAR_Y	ASMTL	0	0	0	0
ENSG00000100033.16_4	PRODH	2.4188	0	9.8151	1.0612
ENSG00000184949.16_6	FAM227A	12.6589	0	13.2537	5.1875
ENSG00000011677.13_3	GABRA3	0.1198	0	40.3732	7.0865
ENSG00000108878.5_3	CACNG1	0.1196	0	0.3323	0.1421
ENSG00000095917.14_4	TPSD1	0.4037	0	0	0.075
ENSG00000068781.21_3	STON1-GTF2A1L	0.119	0	0.0169	0.0168
ENSG00000176678.5_5	FOXL1	0.4105	0	0	0
ENSG00000092009.10_3	CMA1	0.119	0	0	0
ENSG00000205863.10_2	C1QTNF9B	0.1186	0	0.4709	0.0881
ENSG00000140465.14_4	CYP1A1	0.404	0	0	0
ENSG00000204613.11_3	TRIM10	0.1185	0	0.0302	0.009
ENSG00000136327.7_3	NKX2-8	0.1183	0	0.7713	0.1004
ENSG00000172421.9_5	EFCAB3	0.1183	0	0	0
ENSG00000067842.17_3	ATP2B3	0.4045	0	0.0438	0.0146
ENSG00000167105.8_3	TMEM92	0.4047	0	1.1629	0.0687
ENSG00000126233.2_3	SLURP1	0.1182	0	0.0391	0
ENSG00000036473.8_5	OTC	0.4059	0	0.0632	0
ENSG00000188501.11_2	LCTL	0.4077	0	0.2698	0.1275
ENSG00000133878.9_6	DUSP26	0.4082	0	0.015	0.0225
ENSG00000124780.14_3	KCNK17	0.4086	0	0.2163	0.0405
ENSG00000127928.13_4	GNGT1	3.1091	0	5.5169	1.4462
ENSG00000147509.14_4	RGS20	0.4219	0	0.3071	0.0418
ENSG00000215183.5_3	MSMP	0.1045	0	0.3802	0.1035
ENSG00000166426.8_3	CRABP1	28.9481	0	0.2474	0
ENSG00000140481.15_4	CCDC33	3.1376	0	3.2241	0.8945
ENSG00000267360.6_6	AC012309.1	0.1083	0	0.0358	0
ENSG00000179008.9_4	C14orf39	0.4464	0	0	0
ENSG00000171873.8_3	ADRA1D	0.1082	0	0.0358	0
ENSG00000120693.13_4	SMAD9	3.1379	0	1.2092	0.2732
ENSG00000120057.5_3	SFRP5	0.4465	0	0.0875	0
ENSG00000177839.7_6	PCDHB9	3.1391	0	0.1675	0
ENSG00000248329.6_3	APELA	3.1415	0	0	0
ENSG00000101292.7_2	PROKR2	0.1078	0	0.4281	0.0534
ENSG00000213214.4_2	ARHGEF35	0.4483	0	3.034	0.4059
ENSG00000150625.16_5	GPM6A	2.3663	0	1.1387	0.213
ENSG00000135312.6_3	HTR1B	0.1079	0	0	0
ENSG00000163017.14_4	ACTG2	34.329	0	0.0667	0.0333
ENSG00000109832.14_4	DDX25	0.1077	0	0.0713	0.0267
ENSG00000244476.3_3	ERVFRD-1	0.1074	0	0	0
ENSG00000116031.9_3	CD207	8.6939	0	0.011	0.1983
ENSG00000187398.12_7	LUZP2	0.4491	0	0.027	0
ENSG00000183654.9_3	MARCH11	0.1066	0	0	0
ENSG00000250366.2_4	TUNAR	0.1063	0	0.8508	0.0737
ENSG00000137090.12_3	DMRT1	0.1061	0	0.117	0.0525
ENSG00000179468.5_2	OR9A2	0.45	0	0.0595	0.0297
ENSG00000147113.17_3	DIPK2B	7.1443	0	0	0
ENSG00000241119.2_4	UGT1A9	0.1051	0	0.0782	0.052
ENSG00000156096.14_4	UGT2B4	0.1049	0	0	0
ENSG00000172733.11_3	PURG	0.4509	0	0.1148	0.0229
ENSG00000125508.3_2	SRMS	0.4519	0	0.068	0.061
ENSG00000204022.9_4	LIPJ	0.1049	0	0.0416	0.0416
ENSG00000170890.14_3	PLA2G1B	0.4521	0	0	0
ENSG00000275493.2_3	AL627230.1	0.1048	0	0	0
ENSG00000204866.8_4	IGFL2	7.1598	0	0.0318	0
ENSG00000270806.2_4	C17orf50	0.1094	0	0.0724	0.0542
ENSG00000172061.8_3	LRRC15	24.2366	0	0	0
ENSG00000185523.6_3	SPATA45	0.4308	0	0	0.0609
ENSG00000173838.12_5	MARCH10	0.4224	0	0.1065	0.0199
ENSG00000130701.4_3	RBBP8NL	0.4227	0	3.4227	0.5288
ENSG00000165091.17_4	TMC1	0.4232	0	1.969	0.8787
ENSG00000019102.12_3	VSIG2	0.4233	0	0.4376	0.0524
ENSG00000164035.10_5	EMCN	28.9339	0	0	0
ENSG00000214376.6_4	VSTM5	0.4235	0	0.6194	0.1766
ENSG00000170054.14_3	SERPINA9	0.1125	0	0.0149	0
ENSG00000141579.7_3	ZNF750	0.4265	0	0	0
ENSG00000102466.15_3	FGF14	0.4278	0	32.4609	10.687
ENSG00000224109.3_6	CENPVL3	0.1121	0	0	0
ENSG00000171303.7_3	KCNK3	0.428	0	0.4653	0.0378
ENSG00000168505.7_3	GBX2	0.4288	0	0.0158	0
ENSG00000183778.17_4	B3GALT5	2.3842	0	0.1104	0.0354
ENSG00000283434.2_6	CSNKA2IP	0.1116	0	0	0
ENSG00000232040.4_5	ZBED9	3.1325	0	6.3002	1.1094
ENSG00000285085.1_2	AL662884.4	0.1116	0	0	0
ENSG00000105894.12_3	PTN	8.6337	0	1.699	0.2603
ENSG00000155052.14_2	CNTNAP5	0.1112	0	0.1472	0.0551
ENSG00000165972.13_5	CCDC38	0.4316	0	0.0408	0.1221
ENSG00000146938.16_6	NLGN4X	4.6385	0	2.0501	0.6191
ENSG00000081277.12_3	PKP1	0.111	0	2.231	0.2611
ENSG00000100604.13_5	CHGA	15.1212	0	1.2079	0.1023
ENSG00000128710.5_3	HOXD10	2.3739	0	1.3667	0.0611
ENSG00000205864.1_3	KRTAP5-6	0.111	0	0	0
ENSG00000267710.9_7	EDDM13	0.1108	0	0.0367	0
ENSG00000269964.3_4	MEI4	0.1107	0	0.0419	0.0392
ENSG00000148053.16_3	NTRK2	2.3726	0	0.2761	0.0365
ENSG00000261210.8_4	CLEC19A	0.438	0	0.1844	0.2366
ENSG00000143196.5_4	DPT	3.2605	0	0	0
ENSG00000149635.3_3	OCSTAMP	0.088	0	0	0
ENSG00000179774.9_3	ATOH7	0.0615	0	0.0271	0
ENSG00000229453.2_2	SPINK8	0.0701	0	0	0
ENSG00000114757.19_8	PEX5L	0.0701	0	0.1159	0
ENSG00000158874.11_4	APOA2	0.07	0	0	0
ENSG00000189366.9_2	ALG1L	0.6203	0	9.8225	0.6552
ENSG00000021461.16_2	CYP3A43	0.6203	0	0.0492	0
ENSG00000256762.1_4	STH	0.07	0	0	0
ENSG00000286135.1_1	AL603764.2	0.0698	0	0	0
ENSG00000242515.5_3	UGT1A10	0.0696	0	0.0369	0.069
ENSG00000258818.4_4	RNASE4	0.0697	0	0	0.046
ENSG00000186288.5_4	PABPC1L2A	0.0696	0	0	0
ENSG00000198739.11_4	LRRTM3	0.0693	0	0	0
ENSG00000197261.11_2	C6orf141	0.6228	0	0.7924	0.427
ENSG00000155026.16_2	RSPH10B	0.6228	0	0	0.0257
ENSG00000082556.12_5	OPRK1	0.0691	0	0.2662	0.0373
ENSG00000163440.12_4	PDCL2	0.0692	0	0.1145	0
ENSG00000142748.12_2	FCN3	0.624	0	0.0413	0.0309
ENSG00000205002.4_3	AARD	0.6245	0	1.9333	0.2872
ENSG00000184956.16_6	MUC6	2.1652	0	0	0
ENSG00000255552.7_4	LY6G6E	0.0692	0	0	0.2056
ENSG00000188508.11_3	KRTDAP	0.069	0	0.5025	0.4102
ENSG00000131730.16_3	CKMT2	9.029	0	0.0969	0.0483
ENSG00000106511.6_3	MEOX2	3.3751	0	0.0608	0
ENSG00000205858.10_3	LRRC72	0.0686	0	0	0
ENSG00000185176.13_3	AQP12B	0.068	0	0	0
ENSG00000205704.7_5	LINC00634	0.0678	0	0.5162	0
ENSG00000143278.4_5	F13B	0.0678	0	0.0449	0.0224
ENSG00000080293.9_4	SCTR	0.0677	0	0	0
ENSG00000182508.14_3	LHFPL1	0.6262	0	0.4708	0.1409
ENSG00000099960.13_4	SLC7A4	0.0675	0	4.4206	0.6951
ENSG00000166707.11_3	ZCCHC18	0.6273	0	0.0332	0.1491
ENSG00000196611.5_3	MMP1	0.6161	0	0.2091	0.0469
ENSG00000002586.20_6	CD99	173.188	0	85.7727	0
ENSG00000002586.20_6	CD99	173.188	0	85.7727	0
ENSG00000002586.20_6	CD99	173.188	0	85.7727	134.358
ENSG00000002586.20_6	CD99	173.188	0	85.7727	134.358
ENSG00000002586.20_6	CD99	173.188	0	0	134.358
ENSG00000002586.20_6	CD99	173.188	0	0	134.358
ENSG00000002586.20_6	CD99	173.188	0	0	0
ENSG00000002586.20_6	CD99	173.188	0	0	0
ENSG00000002586.20_6	CD99	173.188	189.218	85.7727	0
ENSG00000002586.20_6	CD99	173.188	189.218	85.7727	0
ENSG00000002586.20_6	CD99	173.188	189.218	85.7727	134.358
ENSG00000002586.20_6	CD99	173.188	189.218	85.7727	134.358
ENSG00000002586.20_6	CD99	173.188	189.218	0	134.358
ENSG00000002586.20_6	CD99	173.188	189.218	0	134.358
ENSG00000002586.20_6	CD99	173.188	189.218	0	0
ENSG00000002586.20_6	CD99	173.188	189.218	0	0
ENSG00000002586.20_6_PAR_Y	CD99	0	189.218	85.7727	0
ENSG00000002586.20_6_PAR_Y	CD99	0	189.218	85.7727	0
ENSG00000002586.20_6_PAR_Y	CD99	0	189.218	85.7727	134.358
ENSG00000002586.20_6_PAR_Y	CD99	0	189.218	85.7727	134.358
ENSG00000002586.20_6_PAR_Y	CD99	0	189.218	0	134.358
ENSG00000002586.20_6_PAR_Y	CD99	0	189.218	0	134.358
ENSG00000002586.20_6_PAR_Y	CD99	0	189.218	0	0
ENSG00000002586.20_6_PAR_Y	CD99	0	189.218	0	0
ENSG00000002586.20_6_PAR_Y	CD99	0	0	85.7727	0
ENSG00000002586.20_6_PAR_Y	CD99	0	0	85.7727	0
ENSG00000002586.20_6_PAR_Y	CD99	0	0	85.7727	134.358
ENSG00000002586.20_6_PAR_Y	CD99	0	0	85.7727	134.358
ENSG00000002586.20_6_PAR_Y	CD99	0	0	0	134.358
ENSG00000002586.20_6_PAR_Y	CD99	0	0	0	134.358
ENSG00000002586.20_6_PAR_Y	CD99	0	0	0	0
ENSG00000002586.20_6_PAR_Y	CD99	0	0	0	0
ENSG00000103089.9_3	FA2H	0.5267	0	0.5228	0.0803
ENSG00000225950.8_3	NTF4	0.6128	0	5.5751	1.4793
ENSG00000218823.2_4	PAPOLB	0.0725	0	0.0096	0
ENSG00000145681.11_7	HAPLN1	3.9348	0	0	0
ENSG00000249242.8_5	TMEM150C	3.3433	0	1.7609	0.3624
ENSG00000174482.10_3	LINGO2	0.0725	0	0.7402	0.4514
ENSG00000189108.13_4	IL1RAPL2	0.0724	0	1.5811	0.9084
ENSG00000198535.5_3	C2CD4A	0.0723	0	0.1376	0.0269
ENSG00000091128.13_8	LAMB4	0.0721	0	0.0955	0.0476
ENSG00000135914.6_3	HTR2B	2.1811	0	0.0095	0.0711
ENSG00000186439.14_6	TRDN	0.0722	0	7.0374	1.8588
ENSG00000162618.15_4	ADGRL4	21.5722	0	0.1042	0
ENSG00000162188.6_3	GNG3	0.0721	0	0.2385	0.0714
ENSG00000131620.17_5	ANO1	24.4898	0	33.0585	3.2248
ENSG00000171864.5_3	PRND	0.6023	0	0	0
ENSG00000100078.4_3	PLA2G3	0.0719	0	0	0
ENSG00000213023.11_4	SYT3	0.6033	0	0.5794	0.0964
ENSG00000112214.10_3	FHL5	2.1751	0	0.0108	0
ENSG00000206069.6_3	TMEM211	0.0719	0	0.119	0
ENSG00000122733.12_2	PHF24	0.61	0	0.0877	0.1576
ENSG00000042304.11_6	C2orf83	0.0717	0	0.0712	0
ENSG00000166924.9_4	NYAP1	0.6102	0	1.4766	0.4144
ENSG00000204583.10_3	LRCOL1	0.0717	0	0.0237	0
ENSG00000204956.5_3	PCDHGA1	0.6104	0	0.2708	0.0498
ENSG00000165646.14_6	SLC18A2	0.6105	0	0.0052	0.0155
ENSG00000169550.14_5	MUC15	0.0716	0	1.7603	0.2331
ENSG00000102924.12_3	CBLN1	0.0714	0	0.0945	0.1061
ENSG00000079112.10_5	CDH17	0.0706	0	0.0093	0
ENSG00000188573.8_5	FBLL1	0.0702	0	0.6351	0.1855
ENSG00000157103.12_5	SLC6A1	0.6108	0	0.005	0
ENSG00000075673.11_3	ATP12A	0.0701	0	0.0155	0
ENSG00000181781.9_2	ODF3L2	0.0671	0	0.0296	0
ENSG00000187186.15_7	AL162231.1	0.067	0	0.1329	0
ENSG00000163982.5_2	OTOP1	0.0668	0	0	0
ENSG00000169067.4_4	ACTBL2	0.0669	0	0.671	0.0441
ENSG00000149295.14_4	DRD2	0.6487	0	0.6438	0.2998
ENSG00000261787.2_3	TCF24	0.6495	0	0.3907	0.0195
ENSG00000106236.4_3	NPTX2	4.8511	0	0.7184	0.0694
ENSG00000113205.5_4	PCDHB3	3.4007	0	0.3985	0.1052
ENSG00000204195.4_3	AWAT1	0.0633	0	0.0419	0.094
ENSG00000111404.6_2	RERGL	4.856	0	0.0282	0
ENSG00000179058.7_5	C9orf50	0.6535	0	0.2671	0.0571
ENSG00000144331.20_5	ZNF385B	2.1423	0	0.2444	0.1463
ENSG00000138435.16_4	CHRNA1	2.1405	0	0.0221	0
ENSG00000180305.5_3	WFDC10A	0.0632	0	0.0418	0
ENSG00000128713.14_4	HOXD11	0.063	0	0.4171	0.0416
ENSG00000157890.17_3	MEGF11	0.6555	0	1.6536	0.1217
ENSG00000124721.18_7	DNAH8	0.0626	0	0.0271	0.0167
ENSG00000203740.3_2	METTL11B	0.6563	0	0	0
ENSG00000074219.13_5	TEAD2	16.3683	0	45.8845	6.0916
ENSG00000086991.13_3	NOX4	9.1097	0	21.9847	10.4991
ENSG00000198353.8_4	HOXC4	4.8627	0	0.8787	0.0607
ENSG00000181541.6_3	MAB21L2	0.6612	0	0.162	0.0121
ENSG00000181092.10_3	ADIPOQ	16.3866	0	0.0045	0.0067
ENSG00000120279.6_5	MYCT1	3.4149	0	0	0
ENSG00000152669.9_3	CCNO	0.6655	0	0.854	0.4194
ENSG00000171450.6_3	CDK5R2	0.0625	0	0	0.0124
ENSG00000197191.6_4	CYSRT1	0.6657	0	4.2246	0.7792
ENSG00000164197.12_4	RNF180	6.6711	0	0.7993	0.1607
ENSG00000183145.9_3	RIPPLY3	0.0621	0	0.6679	0.0461
ENSG00000150361.12_4	KLHL1	0.0617	0	0.0153	0
ENSG00000164049.14_3	FBXW12	0.0617	0	0	0
ENSG00000177508.12_3	IRX3	0.6672	0	0.2408	0.04
ENSG00000101198.15_3	NKAIN4	0.6675	0	0.1559	0.0778
ENSG00000166407.14_3	LMO1	0.6487	0	6.4157	1.2849
ENSG00000133124.11_3	IRS4	0.0634	0	0.0105	0
ENSG00000244734.4_4	HBB	64.4424	0	0	0
ENSG00000113430.10_4	IRX4	0.0651	0	0	0
ENSG00000187758.8_3	ADH1A	0.0667	0	0	0
ENSG00000158055.15_2	GRHL3	3.9223	0	6.9532	1.649
ENSG00000197893.13_3	NRAP	0.6302	0	0.0149	0
ENSG00000170820.11_2	FSHR	0.0665	0	0	0
ENSG00000165061.15_4	ZMAT4	0.6333	0	0.0349	0
ENSG00000188199.10_5	NUTM2B	0.0662	0	0.0313	0.0281
ENSG00000140832.9_3	MARVELD3	3.3899	0	9.9892	2.0939
ENSG00000183117.19_7	CSMD1	0.066	0	0.0175	0
ENSG00000165202.3_5	OR1Q1	0.0659	0	0.4142	0.0653
ENSG00000179242.16_5	CDH4	0.066	0	0.0062	0
ENSG00000251258.2_4	RFPL4B	0.0656	0	0.0109	0
ENSG00000088726.16_5	TMEM40	0.0651	0	0.1724	0
ENSG00000168515.3_3	SCGB1D1	11.6853	0	0	0
ENSG00000184601.10_3	C14orf180	0.6355	0	0	0
ENSG00000269466.3_6	H3.Y	0.0637	0	0.1264	0
ENSG00000137463.5_4	MGARP	0.636	0	0.0337	0
ENSG00000124334.17_5	IL9R	0.636	0	0	0.0822
ENSG00000124334.17_5	IL9R	0.636	0	0	0.0822
ENSG00000124334.17_5	IL9R	0.636	0	0	0.0822
ENSG00000124334.17_5	IL9R	0.636	0	0	0.0822
ENSG00000124334.17_5	IL9R	0.636	0	0	0
ENSG00000124334.17_5	IL9R	0.636	0	0	0
ENSG00000124334.17_5	IL9R	0.636	0	0	0
ENSG00000124334.17_5	IL9R	0.636	0	0	0
ENSG00000124334.17_5	IL9R	0.636	0.0709	0	0.0822
ENSG00000124334.17_5	IL9R	0.636	0.0709	0	0.0822
ENSG00000124334.17_5	IL9R	0.636	0.0709	0	0.0822
ENSG00000124334.17_5	IL9R	0.636	0.0709	0	0.0822
ENSG00000124334.17_5	IL9R	0.636	0.0709	0	0
ENSG00000124334.17_5	IL9R	0.636	0.0709	0	0
ENSG00000124334.17_5	IL9R	0.636	0.0709	0	0
ENSG00000124334.17_5	IL9R	0.636	0.0709	0	0
ENSG00000124334.17_5_PAR_Y	IL9R	0	0.0709	0	0.0822
ENSG00000124334.17_5_PAR_Y	IL9R	0	0.0709	0	0.0822
ENSG00000124334.17_5_PAR_Y	IL9R	0	0.0709	0	0.0822
ENSG00000124334.17_5_PAR_Y	IL9R	0	0.0709	0	0.0822
ENSG00000124334.17_5_PAR_Y	IL9R	0	0.0709	0	0
ENSG00000124334.17_5_PAR_Y	IL9R	0	0.0709	0	0
ENSG00000124334.17_5_PAR_Y	IL9R	0	0.0709	0	0
ENSG00000124334.17_5_PAR_Y	IL9R	0	0.0709	0	0
ENSG00000124334.17_5_PAR_Y	IL9R	0	0	0	0.0822
ENSG00000124334.17_5_PAR_Y	IL9R	0	0	0	0.0822
ENSG00000124334.17_5_PAR_Y	IL9R	0	0	0	0.0822
ENSG00000124334.17_5_PAR_Y	IL9R	0	0	0	0.0822
ENSG00000124334.17_5_PAR_Y	IL9R	0	0	0	0
ENSG00000124334.17_5_PAR_Y	IL9R	0	0	0	0
ENSG00000124334.17_5_PAR_Y	IL9R	0	0	0	0
ENSG00000124334.17_5_PAR_Y	IL9R	0	0	0	0
ENSG00000132429.10_3	POPDC3	0.6367	0	0.1805	0.03
ENSG00000139223.3_3	ANP32D	0.065	0	0.0215	0
ENSG00000133433.10_3	GSTT2B	0.0649	0	0	0
ENSG00000152578.13_6	GRIA4	0.0649	0	0.859	0.0857
ENSG00000187714.7_6	SLC18A3	0.0646	0	0.2393	0.0256
ENSG00000187144.11_3	SPATA21	0.0642	0	0	0
ENSG00000198062.10	POTEH	0.064	0	0.0423	0.0317
ENSG00000171551.12_3	ECEL1	0.2159	0	0.1905	0.0356
ENSG00000259571.2_4	BLID	0.6398	0	0.0235	0
ENSG00000185960.14_4	SHOX	0.0638	0	0	0
ENSG00000185960.14_4	SHOX	0.0638	0	0	0
ENSG00000185960.14_4	SHOX	0.0638	0	0	0
ENSG00000185960.14_4	SHOX	0.0638	0	0	0
ENSG00000185960.14_4	SHOX	0.0638	0	0	0
ENSG00000185960.14_4	SHOX	0.0638	0	0	0
ENSG00000185960.14_4	SHOX	0.0638	0	0	0
ENSG00000185960.14_4	SHOX	0.0638	0	0	0
ENSG00000185960.14_4	SHOX	0.0638	0.0205	0	0
ENSG00000185960.14_4	SHOX	0.0638	0.0205	0	0
ENSG00000185960.14_4	SHOX	0.0638	0.0205	0	0
ENSG00000185960.14_4	SHOX	0.0638	0.0205	0	0
ENSG00000185960.14_4	SHOX	0.0638	0.0205	0	0
ENSG00000185960.14_4	SHOX	0.0638	0.0205	0	0
ENSG00000185960.14_4	SHOX	0.0638	0.0205	0	0
ENSG00000185960.14_4	SHOX	0.0638	0.0205	0	0
ENSG00000185960.14_4_PAR_Y	SHOX	0	0.0205	0	0
ENSG00000185960.14_4_PAR_Y	SHOX	0	0.0205	0	0
ENSG00000185960.14_4_PAR_Y	SHOX	0	0.0205	0	0
ENSG00000185960.14_4_PAR_Y	SHOX	0	0.0205	0	0
ENSG00000185960.14_4_PAR_Y	SHOX	0	0.0205	0	0
ENSG00000185960.14_4_PAR_Y	SHOX	0	0.0205	0	0
ENSG00000185960.14_4_PAR_Y	SHOX	0	0.0205	0	0
ENSG00000185960.14_4_PAR_Y	SHOX	0	0.0205	0	0
ENSG00000185960.14_4_PAR_Y	SHOX	0	0	0	0
ENSG00000185960.14_4_PAR_Y	SHOX	0	0	0	0
ENSG00000185960.14_4_PAR_Y	SHOX	0	0	0	0
ENSG00000185960.14_4_PAR_Y	SHOX	0	0	0	0
ENSG00000185960.14_4_PAR_Y	SHOX	0	0	0	0
ENSG00000185960.14_4_PAR_Y	SHOX	0	0	0	0
ENSG00000185960.14_4_PAR_Y	SHOX	0	0	0	0
ENSG00000185960.14_4_PAR_Y	SHOX	0	0	0	0
ENSG00000204740.11_4	MALRD1	2.1493	0	0.6044	0.5321
ENSG00000155886.11_3	SLC24A2	0.5977	0	0.2392	0.0382
ENSG00000285218.1_3	AC026316.4	0.0728	0	0	0
ENSG00000146166.17_4	LGSN	0.073	0	0.0121	0.0181
ENSG00000115221.12_5	ITGB6	2.2452	0	65.5501	7.533
ENSG00000158258.16_4	CLSTN2	8.9357	0	5.4037	1.2106
ENSG00000172782.12_5	FADS6	0.5403	0	0.3575	0.2253
ENSG00000204711.9_3	C9orf135	0.0833	0	2.7544	0.3298
ENSG00000198750.7	GATSL2	0.541	0	0.2386	0.1191
ENSG00000170523.3_4	KRT83	0.083	0	0	0
ENSG00000170788.14_5	DYDC1	0.083	0	0.0549	0
ENSG00000188163.8_4	FAM166A	0.5423	0	0.7554	0.1413
ENSG00000054803.4_3	CBLN4	0.543	0	0	0
ENSG00000267812.1	FKSG68	0.083	0	0	0
ENSG00000213171.2_3	LINGO4	0.0829	0	0.0732	0.0091
ENSG00000170367.5_3	CST5	0.0825	0	0.191	0.0408
ENSG00000262179.3_5	MYMX	0.0825	0	0	0.0408
ENSG00000196844.9_4	PATE2	0.544	0	0.3428	0.1539
ENSG00000148123.15_5	PLPPR1	0.5448	0	0	0
ENSG00000174607.11_5	UGT8	0.5469	0	13.6846	1.7132
ENSG00000167880.7_4	EVPL	6.9201	0	28.9092	4.2913
ENSG00000164123.7_3	C4orf45	0.0824	0	0.1363	0
ENSG00000167768.4_3	KRT1	0.0824	0	0	0.0204
ENSG00000143882.12_6	ATP6V1C2	8.9388	0	0.5222	0.1759
ENSG00000267909.3_3	CCDC177	0.0819	0	0.0197	0.0221
ENSG00000134489.7_3	HRH4	0.0817	0	0.1082	0.027
ENSG00000165682.14_6	CLEC1B	0.5475	0	0	0
ENSG00000168621.15_5	GDNF	2.2486	0	0	0.0377
ENSG00000182674.6_4	KCNB2	0.5483	0	0.0275	0
ENSG00000214216.10_4	IQCJ	0.0815	0	0	0
ENSG00000155282.7	RP11-195B21.3	0.0813	0	0	0.0805
ENSG00000183798.5_3	EMILIN3	0.5503	0	0.0598	0.0163
ENSG00000156150.9_6	ALX3	0.0812	0	0.2283	0.0402
ENSG00000185479.6_3	KRT6B	0.0812	0	0.0358	0
ENSG00000268696.3_8	ZNF723	0.0835	0	0	0
ENSG00000133636.11_3	NTS	0.0836	0	0.3501	0.1103
ENSG00000152670.19_7	DDX4	0.0837	0	0.0185	0
ENSG00000157766.17_5	ACAN	0.5337	0	0.0027	0
ENSG00000243896.4_5	OR2A7	0.5291	0	0.4019	0.0388
ENSG00000164694.17_4	FNDC1	24.3778	0	0.0785	0.0256
ENSG00000075290.8_3	WNT8B	0.0871	0	0.0384	0.0144
ENSG00000172410.4_2	INSL5	0.0871	0	0	0.0431
ENSG00000106384.12_6	MOGAT3	0.0868	0	0	0
ENSG00000135960.10_4	EDAR	0.0868	0	1.9248	0.1863
ENSG00000053438.11_5	NNAT	0.5304	0	0.0206	0.0309
ENSG00000196542.8_2	SPTSSB	0.5308	0	7.3514	0.5256
ENSG00000158008.10_3	EXTL1	3.2735	0	0.0792	0
ENSG00000244414.6_4	CFHR1	0.0861	0	0.0285	0
ENSG00000148942.15_4	SLC5A12	0.5319	0	0.3732	0.1756
ENSG00000197870.12_2	PRB3	0.0856	0	0	0
ENSG00000168830.8_4	HTR1E	0.0853	0	0	0
ENSG00000157578.13_2	LCA5L	3.2757	0	2.0909	0.5725
ENSG00000204538.4_3	PSORS1C2	0.5381	0	1.9463	0.9947
ENSG00000205111.8_3	CDKL4	0.5346	0	1.9895	0.6617
ENSG00000125788.6_3	DEFB126	0.0851	0	2.7583	0.674
ENSG00000114786.16_7	ABHD14A-ACY1	0.0848	0	0	0
ENSG00000184560.8_5	SPEM2	0.0848	0	0	0.021
ENSG00000124818.15_3	OPN5	0.0846	0	0.4059	0.1466
ENSG00000137745.12_3	MMP13	3.2833	0	0.028	0.021
ENSG00000179088.14_4	C12orf42	0.5353	0	0.0295	0.5301
ENSG00000164076.17_4	CAMKV	0.0844	0	0.014	0.0418
ENSG00000005073.5_2	HOXA11	0.0843	0	0	0
ENSG00000188803.15_5	SHISA6	0.0843	0	0	0
ENSG00000149124.11_4	GLYAT	0.0842	0	0	0
ENSG00000261701.7_3	HPR	0.0842	0	0.0371	0
ENSG00000189129.14_5	PLAC9	4.7666	0	0	0
ENSG00000054938.15_6	CHRDL2	0.0809	0	0.0803	0
ENSG00000173452.13_4	TMEM196	0.0804	0	0.2658	0
ENSG00000134259.3_2	NGF	0.5948	0	0.7478	0.0884
ENSG00000120659.15_3	TNFSF11	0.5531	0	0.4608	0.2434
ENSG00000112530.11_3	PACRG	2.2241	0	0.3589	0.1612
ENSG00000089356.18_5	FXYD3	0.5812	0	1.813	0.5345
ENSG00000135423.13_3	GLS2	2.2146	0	0.2664	0.1329
ENSG00000168959.14_3	GRM5	0.0765	0	0.1243	0.0689
ENSG00000196353.11_5	CPNE4	0.0764	0	0.5658	0.0605
ENSG00000124939.6_3	SCGB2A1	8.9821	0	7.6864	2.7279
ENSG00000124232.11_5	RBPJL	0.0761	0	0.063	0
ENSG00000254636.1_3	ARMS2	0.0761	0	0.0252	0
ENSG00000196104.11_7	SPOCK3	0.0758	0	0.0752	0.0188
ENSG00000164900.4_2	GBX1	0.0756	0	0	0
ENSG00000150471.16_4	ADGRL3	2.2067	0	5.3124	1.4208
ENSG00000186479.5_3	RGS7BP	2.204	0	0.1551	0
ENSG00000008196.13_4	TFAP2B	0.0746	0	0	0
ENSG00000144063.3_2	MALL	0.582	0	30.4418	2.4208
ENSG00000105880.7_5	DLX5	2.2034	0	0.0575	0.0574
ENSG00000095752.7_5	IL11	0.587	0	0.3144	0.083
ENSG00000181449.4_6	SOX2	0.0744	0	0.0164	0
ENSG00000116748.21_5	AMPD1	0.5885	0	0.2921	0.1093
ENSG00000174498.14_7	IGDCC3	0.5903	0	0	0
ENSG00000196711.9_5	ALKAL1	0.0743	0	0	0
ENSG00000112273.7_4	HDGFL1	0.0741	0	0	0
ENSG00000162728.5_3	KCNJ9	0.0741	0	0.049	0
ENSG00000107165.13_5	TYRP1	0.592	0	23.1094	4.1428
ENSG00000167359.8_4	OR51I1	0.5931	0	0	0
ENSG00000075886.11_3	TUBA3D	0.594	0	0	0
ENSG00000185888.5_2	PRSS38	0.0737	0	0.0163	0
ENSG00000159387.7_2	IRX6	0.5949	0	0.0207	0.031
ENSG00000111704.11_5	NANOG	0.073	0	0.0483	0.0362
ENSG00000112499.13_3	SLC22A2	0.073	0	0.1931	0.0482
ENSG00000213471.10_6	TTLL13P	0.0767	0	0.0406	0.0304
ENSG00000185437.13_4	SH3BGR	0.0767	0	0	0.038
ENSG00000095587.9_3	TLL2	0.5775	0	0.0655	0.0327
ENSG00000175946.8_2	KLHL38	0.0786	0	0	0
ENSG00000072444.10	ASAH2C	0.08	0	0.1165	0.0158
ENSG00000143184.5_3	XCL1	0.5583	0	1.041	0.2011
ENSG00000137860.12_3	SLC28A2	0.08	0	0	0.0264
ENSG00000163273.4_3	NPPC	0.08	0	0.053	0.0396
ENSG00000120341.18_7	SEC16B	0.5598	0	0.1019	0.0554
ENSG00000106633.17_4	GCK	0.0798	0	0.243	0.0316
ENSG00000185559.16_5	DLK1	0.561	0	0	0
ENSG00000164707.15_3	SLC13A4	2.2312	0	0	0
ENSG00000121853.4_4	GHSR	0.0793	0	0	0
ENSG00000124194.16_3	GDAP1L1	0.0792	0	0.0131	0
ENSG00000176988.9_3	FMR1NB	0.0792	0	0.1311	0.0785
ENSG00000188487.11_3	INSC	0.079	0	0	0
ENSG00000235718.9_4	MFRP	0.0786	0	0	0
ENSG00000198908.12_4	BHLHB9	0.0784	0	0.0052	0.0078
ENSG00000102195.10_4	GPR50	0.0771	0	0	0
ENSG00000136546.16_5	SCN7A	2.2261	0	0.4156	0.2183
ENSG00000111732.11_3	AICDA	0.0783	0	0	0
ENSG00000214510.10_4	SPINK13	0.5653	0	0.0312	0
ENSG00000101981.11_4	F9	0.078	0	0	0
ENSG00000152969.20_8	JAKMIP1	0.078	0	0.0086	0.0129
ENSG00000183560.9_3	IZUMO1R	0.0777	0	0	0
ENSG00000160472.5_3	TMEM190	0.5661	0	0	0
ENSG00000222046.2_2	DCDC2B	0.0776	0	0.0385	0.0192
ENSG00000215595.2_4	C20orf202	0.0774	0	0.0384	0.0383
ENSG00000128714.6_3	HOXD13	0.0773	0	0.0171	0
ENSG00000286094.1_1	AC026740.3	0.0773	0	0.0341	0.0255
ENSG00000184330.12_3	S100A7A	0.5708	0	0	0.0628
ENSG00000130054.4_2	FAM155B	0.5742	0	0.3183	0.0154
ENSG00000206075.14_4	SERPINB5	0.4022	0	0.8363	0
ENSG00000271092.5_6	TLCD4-RWDD3	0.4014	0	0.1138	0.3123
ENSG00000151468.11_6	CCDC3	8.5094	0	4.3026	2.0391
ENSG00000230873.8_2	STMND1	0.1884	0	0.0312	0
ENSG00000144488.15_3	ESPNL	0.1881	0	0.6562	0.1185
ENSG00000254585.5_6	MAGEL2	0.1874	0	0.0143	0
ENSG00000166736.11_4	HTR3A	4.248	0	19.8976	3.4294
ENSG00000144230.16_2	GPR17	0.2639	0	0	0
ENSG00000129744.3_3	ART1	0.1871	0	0	0
ENSG00000188686.2	SCXA	0.187	0	0	0
ENSG00000160339.16_3	FCN2	0.1865	0	0.0206	0
ENSG00000124657.1_3	OR2B6	0.2644	0	0.1531	0.0655
ENSG00000180525.12_4	PRR26	0.1855	0	0.0072	0
ENSG00000137440.5_3	FGFBP1	0.1844	0	3.5837	0.2283
ENSG00000150722.10_4	PPP1R1C	0.2655	0	13.5009	2.8921
ENSG00000165509.13_4	MAGEC3	0.2655	0	0.0479	0
ENSG00000181656.7_3	GPR88	0.2675	0	0	0.0088
ENSG00000253313.6_3	C1orf210	4.4146	0	19.3174	2.2151
ENSG00000204961.6_3	PCDHA9	0.1841	0	0.0906	0.0655
ENSG00000182901.16_4	RGS7	0.1835	0	0.0187	0
ENSG00000164764.11_4	SBSPON	4.2396	0	2.8415	0.446
ENSG00000010282.15_7	HHATL	0.2684	0	0	0.0886
ENSG00000164175.15_3	SLC45A2	0.2695	0	0.4754	0.3855
ENSG00000187616.5_6	MYMK	0.1829	0	0	0
ENSG00000163132.8_5	MSX1	2.6457	0	0.101	0
ENSG00000137252.9_2	HCRTR2	0.1816	0	0.0218	0.0164
ENSG00000166603.5_4	MC4R	0.1817	0	0	0
ENSG00000224982.4_3	TMEM233	0.2714	0	0.0513	0
ENSG00000106852.15_4	LHX6	2.8879	0	1.5265	0.3196
ENSG00000090932.10_2	DLL3	0.2717	0	0.0749	0
ENSG00000136457.10_3	CHAD	0.2739	0	0.0242	0
ENSG00000169314.14_3	C22orf15	0.2743	0	0	0.0906
ENSG00000078725.13_3	BRINP1	7.6659	0	4.0552	0.5074
ENSG00000139874.6_4	SSTR1	0.2624	0	0.0235	0
ENSG00000185155.11_2	MIXL1	0.2598	0	0.0491	0
ENSG00000170891.11_4	CYTL1	2.4212	0	0.1118	0.1673
ENSG00000214575.9_6	CPEB1	0.2597	0	0.0202	0
ENSG00000115507.10_3	OTX1	0.2544	0	0.0561	0.042
ENSG00000230062.5_2	ANKRD66	0.1918	0	0	0
ENSG00000102243.13_4	VGLL1	0.2544	0	68.2715	5.6937
ENSG00000116176.6_2	TPSG1	0.2546	0	0	0
ENSG00000120068.7_4	HOXB8	4.4004	0	0	0
ENSG00000137968.16_2	SLC44A5	0.2558	0	5.0555	1.7334
ENSG00000253649.5_7	PRSS51	0.1903	0	2.4053	0.7163
ENSG00000080224.17_5	EPHA6	2.6572	0	4.7014	1.4814
ENSG00000145692.15_3	BHMT	0.2559	0	0	0
ENSG00000146469.13_3	VIP	0.2562	0	0	0
ENSG00000166148.3_2	AVPR1A	2.8452	0	0	0
ENSG00000204962.6_5	PCDHA8	0.2564	0	0.072	0.0308
ENSG00000100312.11_3	ACR	0.257	0	0.1458	0
ENSG00000167393.18_6	PPP2R3B	13.5329	0	13.4992	0
ENSG00000167393.18_6	PPP2R3B	13.5329	0	13.4992	0
ENSG00000167393.18_6	PPP2R3B	13.5329	0	13.4992	8.2693
ENSG00000167393.18_6	PPP2R3B	13.5329	0	13.4992	8.2693
ENSG00000167393.18_6	PPP2R3B	13.5329	0	0	8.2693
ENSG00000167393.18_6	PPP2R3B	13.5329	0	0	8.2693
ENSG00000167393.18_6	PPP2R3B	13.5329	0	0	0
ENSG00000167393.18_6	PPP2R3B	13.5329	0	0	0
ENSG00000167393.18_6	PPP2R3B	13.5329	5.9033	13.4992	0
ENSG00000167393.18_6	PPP2R3B	13.5329	5.9033	13.4992	0
ENSG00000167393.18_6	PPP2R3B	13.5329	5.9033	13.4992	8.2693
ENSG00000167393.18_6	PPP2R3B	13.5329	5.9033	13.4992	8.2693
ENSG00000167393.18_6	PPP2R3B	13.5329	5.9033	0	8.2693
ENSG00000167393.18_6	PPP2R3B	13.5329	5.9033	0	8.2693
ENSG00000167393.18_6	PPP2R3B	13.5329	5.9033	0	0
ENSG00000167393.18_6	PPP2R3B	13.5329	5.9033	0	0
ENSG00000167393.18_6_PAR_Y	PPP2R3B	0	5.9033	13.4992	0
ENSG00000167393.18_6_PAR_Y	PPP2R3B	0	5.9033	13.4992	0
ENSG00000167393.18_6_PAR_Y	PPP2R3B	0	5.9033	13.4992	8.2693
ENSG00000167393.18_6_PAR_Y	PPP2R3B	0	5.9033	13.4992	8.2693
ENSG00000167393.18_6_PAR_Y	PPP2R3B	0	5.9033	0	8.2693
ENSG00000167393.18_6_PAR_Y	PPP2R3B	0	5.9033	0	8.2693
ENSG00000167393.18_6_PAR_Y	PPP2R3B	0	5.9033	0	0
ENSG00000167393.18_6_PAR_Y	PPP2R3B	0	5.9033	0	0
ENSG00000167393.18_6_PAR_Y	PPP2R3B	0	0	13.4992	0
ENSG00000167393.18_6_PAR_Y	PPP2R3B	0	0	13.4992	0
ENSG00000167393.18_6_PAR_Y	PPP2R3B	0	0	13.4992	8.2693
ENSG00000167393.18_6_PAR_Y	PPP2R3B	0	0	13.4992	8.2693
ENSG00000167393.18_6_PAR_Y	PPP2R3B	0	0	0	8.2693
ENSG00000167393.18_6_PAR_Y	PPP2R3B	0	0	0	8.2693
ENSG00000167393.18_6_PAR_Y	PPP2R3B	0	0	0	0
ENSG00000167393.18_6_PAR_Y	PPP2R3B	0	0	0	0
ENSG00000172724.12_4	CCL19	2.8484	0	0.0428	0.0641
ENSG00000244122.2_5	UGT1A7	0.1899	0	0.0628	0.0672
ENSG00000163064.6_2	EN1	0.2572	0	0	0
ENSG00000161594.7_3	KLHL10	0.2573	0	0.2043	0.3568
ENSG00000172346.15_3	CSDC2	2.8534	0	1.4318	0.1517
ENSG00000284730.1_4	C12orf81	0.1893	0	0.1252	0.0937
ENSG00000198944.6_4	SOWAHA	0.2591	0	0.3074	0.0442
ENSG00000106128.19_3	GHRHR	0.1891	0	0	0
ENSG00000196433.13_5	ASMT	0.1889	0	0.0417	0
ENSG00000196433.13_5	ASMT	0.1889	0	0.0417	0
ENSG00000196433.13_5	ASMT	0.1889	0	0.0417	0.1871
ENSG00000196433.13_5	ASMT	0.1889	0	0.0417	0.1871
ENSG00000196433.13_5	ASMT	0.1889	0	0	0.1871
ENSG00000196433.13_5	ASMT	0.1889	0	0	0.1871
ENSG00000196433.13_5	ASMT	0.1889	0	0	0
ENSG00000196433.13_5	ASMT	0.1889	0	0	0
ENSG00000196433.13_5	ASMT	0.1889	0.7665	0.0417	0
ENSG00000196433.13_5	ASMT	0.1889	0.7665	0.0417	0
ENSG00000196433.13_5	ASMT	0.1889	0.7665	0.0417	0.1871
ENSG00000196433.13_5	ASMT	0.1889	0.7665	0.0417	0.1871
ENSG00000196433.13_5	ASMT	0.1889	0.7665	0	0.1871
ENSG00000196433.13_5	ASMT	0.1889	0.7665	0	0.1871
ENSG00000196433.13_5	ASMT	0.1889	0.7665	0	0
ENSG00000196433.13_5	ASMT	0.1889	0.7665	0	0
ENSG00000196433.13_5_PAR_Y	ASMT	0	0.7665	0.0417	0
ENSG00000196433.13_5_PAR_Y	ASMT	0	0.7665	0.0417	0
ENSG00000196433.13_5_PAR_Y	ASMT	0	0.7665	0.0417	0.1871
ENSG00000196433.13_5_PAR_Y	ASMT	0	0.7665	0.0417	0.1871
ENSG00000196433.13_5_PAR_Y	ASMT	0	0.7665	0	0.1871
ENSG00000196433.13_5_PAR_Y	ASMT	0	0.7665	0	0.1871
ENSG00000196433.13_5_PAR_Y	ASMT	0	0.7665	0	0
ENSG00000196433.13_5_PAR_Y	ASMT	0	0.7665	0	0
ENSG00000196433.13_5_PAR_Y	ASMT	0	0	0.0417	0
ENSG00000196433.13_5_PAR_Y	ASMT	0	0	0.0417	0
ENSG00000196433.13_5_PAR_Y	ASMT	0	0	0.0417	0.1871
ENSG00000196433.13_5_PAR_Y	ASMT	0	0	0.0417	0.1871
ENSG00000196433.13_5_PAR_Y	ASMT	0	0	0	0.1871
ENSG00000196433.13_5_PAR_Y	ASMT	0	0	0	0.1871
ENSG00000196433.13_5_PAR_Y	ASMT	0	0	0	0
ENSG00000196433.13_5_PAR_Y	ASMT	0	0	0	0
ENSG00000255181.3_3	CCDC166	0.2595	0	0.0156	0
ENSG00000117400.17_7	MPL	0.1887	0	0.0454	0.034
ENSG00000242441.8_4	GTF2A1L	0.2595	0	0	0
ENSG00000170298.15_3	LGALS9B	0.2595	0	0.1226	0.1101
ENSG00000162944.11_4	RFTN2	14.0283	0	6.0628	1.847
ENSG00000158748.4_3	HTR6	0.1885	0	0.0108	0
ENSG00000033050.9_4	ABCF2	13.4346	0	15.7859	0
ENSG00000033050.9_4	ABCF2	13.4346	0	15.7859	0
ENSG00000033050.9_4	ABCF2	13.4346	0	15.7859	10.126
ENSG00000033050.9_4	ABCF2	13.4346	0	15.7859	10.126
ENSG00000033050.9_4	ABCF2	13.4346	0	0	10.126
ENSG00000033050.9_4	ABCF2	13.4346	0	0	10.126
ENSG00000033050.9_4	ABCF2	13.4346	0	0	0
ENSG00000033050.9_4	ABCF2	13.4346	0	0	0
ENSG00000033050.9_4	ABCF2	13.4346	5.173	15.7859	0
ENSG00000033050.9_4	ABCF2	13.4346	5.173	15.7859	0
ENSG00000033050.9_4	ABCF2	13.4346	5.173	15.7859	10.126
ENSG00000033050.9_4	ABCF2	13.4346	5.173	15.7859	10.126
ENSG00000033050.9_4	ABCF2	13.4346	5.173	0	10.126
ENSG00000033050.9_4	ABCF2	13.4346	5.173	0	10.126
ENSG00000033050.9_4	ABCF2	13.4346	5.173	0	0
ENSG00000033050.9_4	ABCF2	13.4346	5.173	0	0
ENSG00000285292.1_3	ABCF2	0	5.173	15.7859	0
ENSG00000285292.1_3	ABCF2	0	5.173	15.7859	0
ENSG00000285292.1_3	ABCF2	0	5.173	15.7859	10.126
ENSG00000285292.1_3	ABCF2	0	5.173	15.7859	10.126
ENSG00000285292.1_3	ABCF2	0	5.173	0	10.126
ENSG00000285292.1_3	ABCF2	0	5.173	0	10.126
ENSG00000285292.1_3	ABCF2	0	5.173	0	0
ENSG00000285292.1_3	ABCF2	0	5.173	0	0
ENSG00000285292.1_3	ABCF2	0	0	15.7859	0
ENSG00000285292.1_3	ABCF2	0	0	15.7859	0
ENSG00000285292.1_3	ABCF2	0	0	15.7859	10.126
ENSG00000285292.1_3	ABCF2	0	0	15.7859	10.126
ENSG00000285292.1_3	ABCF2	0	0	0	10.126
ENSG00000285292.1_3	ABCF2	0	0	0	10.126
ENSG00000285292.1_3	ABCF2	0	0	0	0
ENSG00000285292.1_3	ABCF2	0	0	0	0
ENSG00000183559.12_6	C10orf120	0.1815	0	0	0
ENSG00000057593.13_2	F7	0.2745	0	0.0778	0.0388
ENSG00000185467.7_2	KPNA7	0.1805	0	0.1553	0
ENSG00000204659.5_3	CBY3	0.287	0	0.1899	0.0711
ENSG00000170743.17_3	SYT9	0.1761	0	0.0129	0
ENSG00000135447.17_4	PPP1R1A	4.4631	0	0.309	0.0771
ENSG00000102539.5_3	MLNR	0.1759	0	0.0333	0.0249
ENSG00000170929.6_4	OR1M1	0.1744	0	0.0808	0.0518
ENSG00000268925.1	AL161645.2	2.5948	0	0	0
ENSG00000171885.16_7	AQP4	0.293	0	0.0352	0
ENSG00000171772.16_4	SYCE1	0.1738	0	0	0.0246
ENSG00000088926.13_3	F11	0.1737	0	0.2299	0.4301
ENSG00000179083.6_2	FAM133A	0.1737	0	0	0
ENSG00000100146.17_4	SOX10	0.1736	0	0	0
ENSG00000026559.14_5	KCNG1	4.4655	0	3.2741	0.3884
ENSG00000165863.17_3	C10orf82	0.2961	0	0.049	0
ENSG00000180697.9_3	C3orf22	0.2968	0	0.3474	0.1809
ENSG00000125798.14_4	FOXA2	0.2969	0	0.2563	0
ENSG00000283703.2_4	VSIG10L2	0.2973	0	0.0246	0.0368
ENSG00000164266.10_2	SPINK1	0.1724	0	0.076	0
ENSG00000240505.8_3	TNFRSF13B	0.1722	0	0	0.0244
ENSG00000152192.8_4	POU4F1	0.1715	0	0.0045	0.0068
ENSG00000204361.10_6	NXPE2	0.3	0	0.0772	0.033
ENSG00000129991.13_5	TNNI3	0.3013	0	2.4258	0.2984
ENSG00000164100.9_3	NDST3	0.1715	0	4.3835	0.687
ENSG00000197889.10_3	MEIG1	0.3017	0	0.2795	0.1793
ENSG00000177108.5_7	ZDHHC22	0.1714	0	0	0
ENSG00000258644.6_8	SYNJ2BP-COX16	0.3023	0	0.1334	0.0998
ENSG00000171509.16_4	RXFP1	0.1708	0	1.1977	0.2142
ENSG00000166961.15_5	MS4A15	0.3028	0	1.6737	0.1764
ENSG00000138100.13_2	TRIM54	0.303	0	0.3238	0.0462
ENSG00000107147.13_6	KCNT1	2.9192	0	18.6711	6.2035
ENSG00000180739.14_4	S1PR5	0.1762	0	0.3391	0.3331
ENSG00000136011.15_5	STAB2	0.1763	0	0.1166	0
ENSG00000178965.14_3	ERICH3	0.2861	0	0.1096	0.0298
ENSG00000186051.7_3	TAL2	0.2797	0	0.0617	0.1385
ENSG00000178795.9_2	GDPD4	0.2746	0	0.0727	0
ENSG00000140279.12_3	DUOX2	0.2748	0	0.013	0
ENSG00000105668.7_2	UPK1A	0.2749	0	0.0661	0.0495
ENSG00000130377.13_3	ACSBG2	0.2763	0	0	0
ENSG00000101463.6_3	SYNDIG1	13.4087	0	16.5938	3.3198
ENSG00000112761.20_5	CCN6	0.2773	0	4.2373	0.9239
ENSG00000268041.2_6	ERFL	0.1798	0	0.2677	0.0297
ENSG00000197245.6_3	FAM110D	0.2781	0	0	0
ENSG00000105251.10_4	SHD	0.279	0	0.5538	0.0553
ENSG00000182040.9_3	USH1G	0.1786	0	0.0394	0.0118
ENSG00000187682.2_4	ERAS	0.1786	0	0.0985	0.0884
ENSG00000109738.11_3	GLRB	8.2018	0	11.3579	1.5454
ENSG00000166391.15_3	MOGAT2	0.2794	0	0	0
ENSG00000169783.12_5	LINGO1	2.899	0	6.1808	1.4355
ENSG00000196376.11_4	SLC35F1	0.2857	0	0.0687	0.0129
ENSG00000171126.8_5	KCNG3	0.1776	0	0.3749	0.067
ENSG00000170608.3_4	FOXA3	0.1772	0	0.737	0.0501
ENSG00000135744.8_4	AGT	0.2796	0	0.3797	0.0729
ENSG00000183114.8_3	FAM43B	0.2798	0	0.0168	0
ENSG00000184530.9_3	C6orf58	0.2802	0	0.0794	0.0396
ENSG00000139835.14_4	GRTP1	4.4277	0	10.9063	1.406
ENSG00000258388.7_3	PPT2-EGFL8	0.2816	0	0.2484	0.1162
ENSG00000241186.10_4	TDGF1	0.1769	0	0	0
ENSG00000204475.10_3	NCR3	0.2818	0	0.3729	0.1395
ENSG00000137674.4_4	MMP20	0.2822	0	0.0622	0.0466
ENSG00000130720.13_4	FIBCD1	0.2834	0	0.011	0
ENSG00000132702.13_3	HAPLN2	0.1765	0	0.1168	0
ENSG00000181291.7_4	TMEM132E	0.2844	0	0.0235	0
ENSG00000165953.9_2	SERPINA12	0.1925	0	0	0
ENSG00000241563.3_3	CORT	0.1929	0	0.0912	0
ENSG00000188629.12_4	ZNF177	0.2544	0	0	0
ENSG00000121361.5_4	KCNJ8	4.3579	0	0.0273	0.0272
ENSG00000196503.4_5	ARL9	0.2089	0	0.0377	0.094
ENSG00000006611.16_4	USH1C	0.2086	0	0.2071	0.0517
ENSG00000144290.17_5	SLC4A10	0.2263	0	0.0524	0.2465
ENSG00000205456.11_3	TP53TG3D	0.2085	0	2.3684	0.3442
ENSG00000158815.11_3	FGF17	0.2264	0	0.0272	0.0408
ENSG00000129673.9_2	AANAT	0.2076	0	0.2289	0.0343
ENSG00000260325.2_3	HSPB9	0.2269	0	0.6004	0.1685
ENSG00000284969.1_3	AL049629.2	0.2069	0	0.2396	0.2049
ENSG00000125414.19_7	MYH2	0.2284	0	0.0168	0
ENSG00000178171.10_3	AMER3	0.2063	0	0	0
ENSG00000044012.4_3	GUCA2B	0.2062	0	0	0
ENSG00000146678.10_3	IGFBP1	0.2057	0	0.6804	0.0815
ENSG00000005421.9_3	PON1	0.2284	0	0.1763	0.0377
ENSG00000179603.17_5	GRM8	0.2053	0	0.0453	0.0678
ENSG00000197587.10_3	DMBX1	0.2054	0	3.3825	0.3104
ENSG00000119919.11_3	NKX2-3	0.2293	0	0.0303	0
ENSG00000146250.7_3	PRSS35	0.2293	0	0.0674	0.0505
ENSG00000165309.14_5	ARMC3	4.322	0	0.8449	0.2432
ENSG00000178860.8_2	MSC	13.687	0	1.4037	0.61
ENSG00000187581.3_4	COX8C	0.2298	0	0	0
ENSG00000269339.1	AC139768.1	2.7314	0	0	0
ENSG00000122735.16_4	DNAI1	7.93	0	0.0722	0.072
ENSG00000187135.7_2	VSTM2B	0.2302	0	0	0
ENSG00000221887.6_4	HMSD	0.2035	0	0.3703	0.0504
ENSG00000160838.14_3	LRRC71	0.2313	0	0.0459	0
ENSG00000230257.4_4	NFE4	0.2318	0	0	0.0383
ENSG00000279012.2_5	OR51B2	0.2321	0	0	0
ENSG00000132518.6_2	GUCY2D	0.2351	0	0.0778	0
ENSG00000188783.6_3	PRELP	13.6718	0	0.0214	0
ENSG00000167759.13_3	KLK13	0.2262	0	4.4232	0.5973
ENSG00000117971.12_4	CHRNB4	0.2094	0	0.4156	0.0592
ENSG00000205221.12_2	VIT	0.2258	0	0.1245	0.0497
ENSG00000204969.7_5	PCDHA2	0.214	0	0	0
ENSG00000170290.4_3	SLN	0.2156	0	0	0
ENSG00000008118.10_4	CAMK1G	0.2155	0	0	0
ENSG00000152936.10_7	LMNTD1	0.2174	0	0.0575	0
ENSG00000165443.12_3	PHYHIPL	0.2154	0	0.3826	0.1235
ENSG00000157330.10_3	C1orf158	0.215	0	0	0.1278
ENSG00000174502.19_4	SLC26A9	0.218	0	0.9566	0.0648
ENSG00000160180.15_3	TFF3	0.2143	0	0.0945	0.0707
ENSG00000179097.5_2	HTR1F	0.2182	0	0.0525	0.0295
ENSG00000164796.18_4	CSMD3	0.2206	0	0	0.0301
ENSG00000185985.10_6	SLITRK2	0.2206	0	0.2126	0.0268
ENSG00000287585.1_1	AC231656.1	0.2208	0	0.5845	0.9477
ENSG00000002746.15_4	HECW1	31.3936	0	8.8635	2.1267
ENSG00000174226.9_3	SNX31	0.2212	0	0.1464	0.2191
ENSG00000171403.10_3	KRT9	0.2137	0	0	0
ENSG00000180318.4_3	ALX1	0.2104	0	0	0
ENSG00000176956.12_3	LY6H	0.2224	0	0	0
ENSG00000185352.8_3	HS6ST3	0.2135	0	3.5898	0.6053
ENSG00000133135.14_6	RNF128	0.2229	0	0.0543	0
ENSG00000120471.15_2	TP53AIP1	0.2125	0	0.0703	0.0526
ENSG00000112041.13_4	TULP1	0.2234	0	0.4434	0.1327
ENSG00000285000.1_4	AC008581.2	0.2122	0	0	0.0657
ENSG00000204152.6	TIMM23B	0.2118	0	0.0701	0.0524
ENSG00000143125.6_3	PROK1	0.2235	0	0.0296	0
ENSG00000144681.10_4	STAC	2.7463	0	3.4739	0.6799
ENSG00000278224.6_4	PRICKLE4	0.2106	0	0.0796	0.0596
ENSG00000107159.13_3	CA9	0.2104	0	13.2048	1.399
ENSG00000142973.14_3	CYP4B1	31.1863	0	22.9202	9.1386
ENSG00000170419.10_4	VSTM2A	0.2247	0	0.085	0
ENSG00000147145.12_3	LPAR4	2.7128	0	0.026	0
ENSG00000161609.10_6	CCDC155	0.2366	0	3.2877	0.3281
ENSG00000007001.12_3	UPP2	0.1929	0	0.2042	0.1146
ENSG00000049283.18_6	EPN3	23.211	0	72.0921	8.1582
ENSG00000183889.12_8	AC138969.1	0.2507	0	0.3981	0.1986
ENSG00000163060.8_3	TEKT4	0.2508	0	0	0.0497
ENSG00000007908.16_5	SELE	2.8299	0	0	0
ENSG00000118194.20_6	TNNT2	0.1976	0	1.7558	0.5312
ENSG00000236699.9_4	ARHGEF38	0.2511	0	0.1108	0.0829
ENSG00000198223.16_4	CSF2RA	13.591	0	0.0963	0
ENSG00000198223.16_4	CSF2RA	13.591	0	0.0963	0
ENSG00000198223.16_4	CSF2RA	13.591	0	0.0963	36.6773
ENSG00000198223.16_4	CSF2RA	13.591	0	0.0963	36.6773
ENSG00000198223.16_4	CSF2RA	13.591	0	0	36.6773
ENSG00000198223.16_4	CSF2RA	13.591	0	0	36.6773
ENSG00000198223.16_4	CSF2RA	13.591	0	0	0
ENSG00000198223.16_4	CSF2RA	13.591	0	0	0
ENSG00000198223.16_4	CSF2RA	13.591	108.1	0.0963	0
ENSG00000198223.16_4	CSF2RA	13.591	108.1	0.0963	0
ENSG00000198223.16_4	CSF2RA	13.591	108.1	0.0963	36.6773
ENSG00000198223.16_4	CSF2RA	13.591	108.1	0.0963	36.6773
ENSG00000198223.16_4	CSF2RA	13.591	108.1	0	36.6773
ENSG00000198223.16_4	CSF2RA	13.591	108.1	0	36.6773
ENSG00000198223.16_4	CSF2RA	13.591	108.1	0	0
ENSG00000198223.16_4	CSF2RA	13.591	108.1	0	0
ENSG00000198223.16_4_PAR_Y	CSF2RA	0	108.1	0.0963	0
ENSG00000198223.16_4_PAR_Y	CSF2RA	0	108.1	0.0963	0
ENSG00000198223.16_4_PAR_Y	CSF2RA	0	108.1	0.0963	36.6773
ENSG00000198223.16_4_PAR_Y	CSF2RA	0	108.1	0.0963	36.6773
ENSG00000198223.16_4_PAR_Y	CSF2RA	0	108.1	0	36.6773
ENSG00000198223.16_4_PAR_Y	CSF2RA	0	108.1	0	36.6773
ENSG00000198223.16_4_PAR_Y	CSF2RA	0	108.1	0	0
ENSG00000198223.16_4_PAR_Y	CSF2RA	0	108.1	0	0
ENSG00000198223.16_4_PAR_Y	CSF2RA	0	0	0.0963	0
ENSG00000198223.16_4_PAR_Y	CSF2RA	0	0	0.0963	0
ENSG00000198223.16_4_PAR_Y	CSF2RA	0	0	0.0963	36.6773
ENSG00000198223.16_4_PAR_Y	CSF2RA	0	0	0.0963	36.6773
ENSG00000198223.16_4_PAR_Y	CSF2RA	0	0	0	36.6773
ENSG00000198223.16_4_PAR_Y	CSF2RA	0	0	0	36.6773
ENSG00000198223.16_4_PAR_Y	CSF2RA	0	0	0	0
ENSG00000198223.16_4_PAR_Y	CSF2RA	0	0	0	0
ENSG00000105205.7_3	CLC	0.1974	0	0	0
ENSG00000187690.4_6	EZHIP	0.1971	0	0.0109	0.0163
ENSG00000185290.4_4	NUPR2	0.2511	0	3.8215	0.4974
ENSG00000186832.9_6	KRT16	2.6736	0	33.7409	1.8082
ENSG00000150201.15_3	FXYD4	0.1965	0	0	0.0486
ENSG00000214511.3_2	HIGD1C	0.2518	0	0	0.0831
ENSG00000153303.17_3	FRMD1	0.1962	0	0.0505	0.0216
ENSG00000146013.11_4	GFRA3	0.1954	0	0.097	0.0161
ENSG00000184344.4_3	GDF3	0.2519	0	0.0167	0
ENSG00000072041.17_4	SLC6A15	8.0475	0	0.0348	0.0521
ENSG00000235034.7_4	C19orf81	0.2526	0	0.5433	0.1251
ENSG00000172073.4_3	TEX37	0.1951	0	0.0516	0
ENSG00000175229.7_3	GAL3ST3	0.2532	0	0.0644	0
ENSG00000148541.13_8	FAM13C	13.9757	0	0.6627	0.2254
ENSG00000242366.3_3	UGT1A8	0.194	0	0.0685	0.0769
ENSG00000197976.12_3	AKAP17A	13.5687	0	13.5698	0
ENSG00000197976.12_3	AKAP17A	13.5687	0	13.5698	0
ENSG00000197976.12_3	AKAP17A	13.5687	0	13.5698	17.1969
ENSG00000197976.12_3	AKAP17A	13.5687	0	13.5698	17.1969
ENSG00000197976.12_3	AKAP17A	13.5687	0	0	17.1969
ENSG00000197976.12_3	AKAP17A	13.5687	0	0	17.1969
ENSG00000197976.12_3	AKAP17A	13.5687	0	0	0
ENSG00000197976.12_3	AKAP17A	13.5687	0	0	0
ENSG00000197976.12_3	AKAP17A	13.5687	36.7318	13.5698	0
ENSG00000197976.12_3	AKAP17A	13.5687	36.7318	13.5698	0
ENSG00000197976.12_3	AKAP17A	13.5687	36.7318	13.5698	17.1969
ENSG00000197976.12_3	AKAP17A	13.5687	36.7318	13.5698	17.1969
ENSG00000197976.12_3	AKAP17A	13.5687	36.7318	0	17.1969
ENSG00000197976.12_3	AKAP17A	13.5687	36.7318	0	17.1969
ENSG00000197976.12_3	AKAP17A	13.5687	36.7318	0	0
ENSG00000197976.12_3	AKAP17A	13.5687	36.7318	0	0
ENSG00000197976.12_3_PAR_Y	AKAP17A	0	36.7318	13.5698	0
ENSG00000197976.12_3_PAR_Y	AKAP17A	0	36.7318	13.5698	0
ENSG00000197976.12_3_PAR_Y	AKAP17A	0	36.7318	13.5698	17.1969
ENSG00000197976.12_3_PAR_Y	AKAP17A	0	36.7318	13.5698	17.1969
ENSG00000197976.12_3_PAR_Y	AKAP17A	0	36.7318	0	17.1969
ENSG00000197976.12_3_PAR_Y	AKAP17A	0	36.7318	0	17.1969
ENSG00000197976.12_3_PAR_Y	AKAP17A	0	36.7318	0	0
ENSG00000197976.12_3_PAR_Y	AKAP17A	0	36.7318	0	0
ENSG00000197976.12_3_PAR_Y	AKAP17A	0	0	13.5698	0
ENSG00000197976.12_3_PAR_Y	AKAP17A	0	0	13.5698	0
ENSG00000197976.12_3_PAR_Y	AKAP17A	0	0	13.5698	17.1969
ENSG00000197976.12_3_PAR_Y	AKAP17A	0	0	13.5698	17.1969
ENSG00000197976.12_3_PAR_Y	AKAP17A	0	0	0	17.1969
ENSG00000197976.12_3_PAR_Y	AKAP17A	0	0	0	17.1969
ENSG00000197976.12_3_PAR_Y	AKAP17A	0	0	0	0
ENSG00000197976.12_3_PAR_Y	AKAP17A	0	0	0	0
ENSG00000167644.12_5	C19orf33	0.1938	0	0.9831	0.064
ENSG00000170091.11_7	NSG2	0.1937	0	0	0.048
ENSG00000164627.18_3	KIF6	0.2536	0	0.7085	0.0698
ENSG00000139155.8_2	SLCO1C1	0.1935	0	0.0341	0.0255
ENSG00000151617.17_6	EDNRA	30.8246	0	1.3949	0.2539
ENSG00000149633.12_8	KIAA1755	2.8367	0	0.1052	0
ENSG00000167178.16_4	ISLR2	2.6672	0	0.3221	0.2306
ENSG00000174325.5_4	DIRC1	0.2499	0	0	0
ENSG00000000005.6_3	TNMD	0.2494	0	0.0236	0
ENSG00000240747.7_3	KRBOX1	0.2491	0	1.7856	0.37
ENSG00000185519.9_3	FAM131C	0.2005	0	1.1937	0.3088
ENSG00000183072.10_5	NKX2-5	0.2026	0	0	0
ENSG00000083307.12_6	GRHL2	31.6947	0	96.1719	16.8165
ENSG00000165323.15_2	FAT3	4.3643	0	2.7272	0.9241
ENSG00000106113.19_3	CRHR2	0.2022	0	0	0
ENSG00000147573.17_5	TRIM55	0.2383	0	0.3364	0.1101
ENSG00000160801.14_5	PTH1R	2.811	0	0	0
ENSG00000133107.14_4	TRPC4	0.2022	0	0.2304	0.0779
ENSG00000172478.18_7	MAB21L4	0.2385	0	0.4104	0.0945
ENSG00000152822.14_7	GRM1	0.2009	0	0.0638	0.0557
ENSG00000180785.10_4	OR51E1	0.239	0	0	0
ENSG00000176571.12_6	CNBD1	0.2392	0	0.0633	0
ENSG00000235961.5_2	PNMA6A	0.2396	0	1.0632	0.2373
ENSG00000113722.17_3	CDX1	0.2397	0	0	0
ENSG00000167554.15_4	ZNF610	2.7061	0	5.7901	1.3052
ENSG00000181072.11_2	CHRM2	0.2474	0	0	0.0153
ENSG00000185291.12_3	IL3RA	2.7003	0	0.2513	0
ENSG00000185291.12_3	IL3RA	2.7003	0	0.2513	0
ENSG00000185291.12_3	IL3RA	2.7003	0	0.2513	1.7549
ENSG00000185291.12_3	IL3RA	2.7003	0	0.2513	1.7549
ENSG00000185291.12_3	IL3RA	2.7003	0	0	1.7549
ENSG00000185291.12_3	IL3RA	2.7003	0	0	1.7549
ENSG00000185291.12_3	IL3RA	2.7003	0	0	0
ENSG00000185291.12_3	IL3RA	2.7003	0	0	0
ENSG00000185291.12_3	IL3RA	2.7003	11.6239	0.2513	0
ENSG00000185291.12_3	IL3RA	2.7003	11.6239	0.2513	0
ENSG00000185291.12_3	IL3RA	2.7003	11.6239	0.2513	1.7549
ENSG00000185291.12_3	IL3RA	2.7003	11.6239	0.2513	1.7549
ENSG00000185291.12_3	IL3RA	2.7003	11.6239	0	1.7549
ENSG00000185291.12_3	IL3RA	2.7003	11.6239	0	1.7549
ENSG00000185291.12_3	IL3RA	2.7003	11.6239	0	0
ENSG00000185291.12_3	IL3RA	2.7003	11.6239	0	0
ENSG00000185291.12_3_PAR_Y	IL3RA	0	11.6239	0.2513	0
ENSG00000185291.12_3_PAR_Y	IL3RA	0	11.6239	0.2513	0
ENSG00000185291.12_3_PAR_Y	IL3RA	0	11.6239	0.2513	1.7549
ENSG00000185291.12_3_PAR_Y	IL3RA	0	11.6239	0.2513	1.7549
ENSG00000185291.12_3_PAR_Y	IL3RA	0	11.6239	0	1.7549
ENSG00000185291.12_3_PAR_Y	IL3RA	0	11.6239	0	1.7549
ENSG00000185291.12_3_PAR_Y	IL3RA	0	11.6239	0	0
ENSG00000185291.12_3_PAR_Y	IL3RA	0	11.6239	0	0
ENSG00000185291.12_3_PAR_Y	IL3RA	0	0	0.2513	0
ENSG00000185291.12_3_PAR_Y	IL3RA	0	0	0.2513	0
ENSG00000185291.12_3_PAR_Y	IL3RA	0	0	0.2513	1.7549
ENSG00000185291.12_3_PAR_Y	IL3RA	0	0	0.2513	1.7549
ENSG00000185291.12_3_PAR_Y	IL3RA	0	0	0	1.7549
ENSG00000185291.12_3_PAR_Y	IL3RA	0	0	0	1.7549
ENSG00000185291.12_3_PAR_Y	IL3RA	0	0	0	0
ENSG00000185291.12_3_PAR_Y	IL3RA	0	0	0	0
ENSG00000172789.3_3	HOXC5	0.2415	0	0	0
ENSG00000214946.14_3	TBC1D26	0.2429	0	0.0321	0.0481
ENSG00000273259.3_6	AL049839.2	0.2437	0	0.0134	0
ENSG00000110786.18_3	PTPN5	0.2437	0	0.0147	0
ENSG00000175664.10_3	TEX26	0.2439	0	0.0538	0
ENSG00000105997.22_4	HOXA3	7.7585	0	0.1378	0.1547
ENSG00000170324.21_4	FRMPD2	0.2456	0	0	0.0162
ENSG00000125851.10_3	PCSK2	7.9912	0	0.3646	0.1637
ENSG00000196660.10_2	SLC30A10	0.1992	0	0.0377	0
ENSG00000136352.17_4	NKX2-1	0.199	0	0	0
ENSG00000077274.9_3	CAPN6	0.2468	0	0.0467	0.0087
ENSG00000132840.10_3	BHMT2	7.7576	0	0	0
ENSG00000187905.10_2	LRRC74B	0.1698	0	0.0187	0.0701
ENSG00000198774.5_4	RASSF9	4.4773	0	1.0087	0.2516
ENSG00000270765.5_2	GAS2L2	0.3042	0	0.1161	0.0348
ENSG00000183248.12_4	PRR36	2.458	0	0.6405	0.1723
ENSG00000142515.15_4	KLK3	0.3741	0	0.0381	0
ENSG00000159184.7_2	HOXB13	0.1347	0	0	0
ENSG00000147614.4_4	ATP6V0D2	23.9095	0	0.2453	0.4895
ENSG00000142661.19_3	MYOM3	0.3758	0	4.365	1.37
ENSG00000134240.11_2	HMGCS2	0.1343	0	0	0
ENSG00000102683.7_3	SGCG	0.1342	0	0.1522	0.076
ENSG00000155087.4_3	ODF1	0.134	0	0	0
ENSG00000132677.13_3	RHBG	0.1338	0	0.0553	0.0166
ENSG00000107105.15_8	ELAVL2	0.1336	0	0.0544	0.0102
ENSG00000204683.11_5	C10orf113	0.3771	0	0.7129	0.4268
ENSG00000162891.10_2	IL20	0.3781	0	0.0715	0
ENSG00000140527.15_5	WDR93	0.3797	0	0.1966	0.0327
ENSG00000188393.9_3	CLEC2A	0.3807	0	0	0
ENSG00000134398.15_5	ERN2	0.3813	0	0.2943	0.0629
ENSG00000185988.14_7	PLK5	0.1331	0	0	0
ENSG00000182591.6_3	KRTAP11-1	0.1329	0	0	0
ENSG00000010438.16_4	PRSS3	0.1327	0	0.2341	0
ENSG00000008323.15_3	PLEKHG6	3.0613	0	27.8801	4.6125
ENSG00000154645.14_4	CHODL	4.1109	0	8.4687	1.7902
ENSG00000162039.15_4	MEIOB	3.064	0	0.445	0
ENSG00000066032.18_6	CTNNA2	2.489	0	2.0502	0.4527
ENSG00000132437.18_3	DDC	0.1323	0	0.0375	0
ENSG00000123364.5_3	HOXC13	0.1321	0	0.0087	0
ENSG00000121634.5_2	GJA8	0.3826	0	0.1108	0
ENSG00000244752.3_5	CRYBB2	0.3831	0	0.8988	0.4484
ENSG00000142319.18_3	SLC6A3	0.1311	0	0.1084	0.0974
ENSG00000184374.3_3	COLEC10	0.131	0	0.2058	0.0162
ENSG00000165973.19_6	NELL1	0.384	0	0.231	0
ENSG00000185942.11_3	NKAIN3	0.1307	0	0	0
ENSG00000120498.13_3	TEX11	0.1348	0	0.0069	0
ENSG00000184697.7_4	CLDN6	2.5074	0	62.5319	3.5216
ENSG00000143171.13_3	RXRG	0.1356	0	0	0
ENSG00000134201.12_8	GSTM5	4.133	0	0	0.159
ENSG00000277150.1_2	F8A3	0.1416	0	0	0.0175
ENSG00000186191.7_2	BPIFB4	14.7439	0	0	0.0527
ENSG00000124237.6_3	C20orf85	3.0171	0	0	0
ENSG00000138792.10_4	ENPEP	22.5402	0	18.6039	4.8787
ENSG00000110975.8_4	SYT10	0.1408	0	0.0677	0
ENSG00000196468.5	FGF16	0.1408	0	0	0
ENSG00000167751.13_5	KLK2	0.1396	0	0	0
ENSG00000197745.3_3	SCGB1D4	0.1396	0	0.0924	0.0691
ENSG00000204767.4_5	INSYN2B	0.3553	0	0.0131	0
ENSG00000172179.12_4	PRL	0.1393	0	0	0
ENSG00000213809.9_4	KLRK1	0.3556	0	0.1046	0.0391
ENSG00000178372.8_4	CALML5	3.0283	0	0.0471	0.0353
ENSG00000172020.12_4	GAP43	0.1387	0	0.0803	0
ENSG00000184564.11_5	SLITRK6	0.3562	0	1.4925	0.0962
ENSG00000167741.10_4	GGT6	4.5309	0	13.4268	1.7185
ENSG00000070748.18_3	CHAT	0.1384	0	0.0114	0.0171
ENSG00000180251.5_3	SLC9A4	0.3589	0	1.6132	0.2696
ENSG00000197576.14_4	HOXA4	0.3605	0	0	0.0188
ENSG00000196188.11_3	CTSE	0.1375	0	1.7737	0.0454
ENSG00000175279.22_4	CENPS	0.1366	0	0.2108	0.0902
ENSG00000270011.7_6	ZNF559-ZNF177	0.3633	0	0.0343	0.1028
ENSG00000203943.8_5	SAMD13	0.3638	0	0.7702	0.3242
ENSG00000101405.3_3	OXT	0.3642	0	0	0
ENSG00000175879.9_5	HOXD8	7.3839	0	27.623	3.5169
ENSG00000169297.8_3	NR0B1	0.1361	0	0.2881	0.027
ENSG00000266964.5_5	FXYD1	0.3669	0	0	0
ENSG00000163793.13_3	DNAJC5G	0.1359	0	0.0128	0
ENSG00000140623.13_6	SEPTIN12	0.3694	0	0.6635	0.2091
ENSG00000265107.3_3	GJA5	12.8424	0	2.0132	0.9392
ENSG00000165694.9_3	FRMD7	0.1305	0	0.0432	0.0754
ENSG00000198125.13_4	MB	0.3544	0	1.139	0.1003
ENSG00000099617.4_3	EFNA2	0.3854	0	0.017	0.0127
ENSG00000130234.10_3	ACE2	0.1248	0	1.1561	0.1236
ENSG00000176884.15_5	GRIN1	0.1245	0	0.0165	0.0247
ENSG00000154162.15_4	CDH12	0.1244	0	0.0247	0.0246
ENSG00000164794.9_3	KCNV1	0.3924	0	0.0084	0
ENSG00000101746.15_4	NOL4	0.1242	0	0	0
ENSG00000140254.12_4	DUOXA1	2.4407	0	0.367	0
ENSG00000160973.8_3	FOXH1	0.1242	0	0.3122	0.0984
ENSG00000148082.10_4	SHC3	0.3957	0	0.0476	0.0534
ENSG00000128965.13_5	CHAC1	2.431	0	4.0555	1.0501
ENSG00000130032.16_4	PRRG3	7.2696	0	7.8563	3.1197
ENSG00000204624.8_4	DISP3	0.3957	0	0.0413	0.1444
ENSG00000186897.5_3	C1QL4	3.0792	0	0.0696	0
ENSG00000171819.5_3	ANGPTL7	0.3958	0	0.0727	0
ENSG00000277893.2_3	SRD5A2	0.1241	0	0.0137	0
ENSG00000162594.16_5	IL23R	0.124	0	0.1504	0.0614
ENSG00000179399.15_4	GPC5	0.3967	0	0.6036	0
ENSG00000160951.4_3	PTGER1	0.3967	0	0.4812	0.1091
ENSG00000167723.14_3	TRPV3	0.1238	0	0.2756	0.0669
ENSG00000124935.4_3	SCGB1D2	3.0796	0	3.5772	1.6266
ENSG00000127324.9_3	TSPAN8	0.1231	0	0	0
ENSG00000079841.18_4	RIMS1	0.3971	0	0.4129	0.0468
ENSG00000146276.11_3	GABRR1	0.3975	0	0.2338	0.0547
ENSG00000122592.8_5	HOXA7	3.0872	0	0.0704	0
ENSG00000136014.12_5	USP44	0.3979	0	0.7076	0.1478
ENSG00000187372.11_3	PCDHB13	2.4302	0	0.7246	0.2376
ENSG00000125878.6_3	TCF15	0.4005	0	0.9937	0.119
ENSG00000184811.4_4	TRARG1	4.0962	0	0	0
ENSG00000205835.9_3	GMNC	0.4013	0	0.6584	0.1113
ENSG00000132693.12_3	CRP	0.1215	0	0	0
ENSG00000276087.2_6	AC008073.3	0.125	0	0.0118	0.0354
ENSG00000181803.3_4	OR6S1	0.1251	0	0	0
ENSG00000183571.11_6	PGPEP1L	0.1252	0	0	0
ENSG00000128253.15_4	RFPL2	0.128	0	0.1129	0.0634
ENSG00000177414.13_4	UBE2U	0.1303	0	0.1293	0.0323
ENSG00000118298.12_4	CA14	0.1292	0	0.114	0
ENSG00000170454.6_3	KRT75	0.1291	0	0.019	0
ENSG00000182162.11_4	P2RY8	3.0645	0	0.4584	0
ENSG00000182162.11_4	P2RY8	3.0645	0	0.4584	0
ENSG00000182162.11_4	P2RY8	3.0645	0	0.4584	6.8746
ENSG00000182162.11_4	P2RY8	3.0645	0	0.4584	6.8746
ENSG00000182162.11_4	P2RY8	3.0645	0	0	6.8746
ENSG00000182162.11_4	P2RY8	3.0645	0	0	6.8746
ENSG00000182162.11_4	P2RY8	3.0645	0	0	0
ENSG00000182162.11_4	P2RY8	3.0645	0	0	0
ENSG00000182162.11_4	P2RY8	3.0645	7.7341	0.4584	0
ENSG00000182162.11_4	P2RY8	3.0645	7.7341	0.4584	0
ENSG00000182162.11_4	P2RY8	3.0645	7.7341	0.4584	6.8746
ENSG00000182162.11_4	P2RY8	3.0645	7.7341	0.4584	6.8746
ENSG00000182162.11_4	P2RY8	3.0645	7.7341	0	6.8746
ENSG00000182162.11_4	P2RY8	3.0645	7.7341	0	6.8746
ENSG00000182162.11_4	P2RY8	3.0645	7.7341	0	0
ENSG00000182162.11_4	P2RY8	3.0645	7.7341	0	0
ENSG00000182162.11_4_PAR_Y	P2RY8	0	7.7341	0.4584	0
ENSG00000182162.11_4_PAR_Y	P2RY8	0	7.7341	0.4584	0
ENSG00000182162.11_4_PAR_Y	P2RY8	0	7.7341	0.4584	6.8746
ENSG00000182162.11_4_PAR_Y	P2RY8	0	7.7341	0.4584	6.8746
ENSG00000182162.11_4_PAR_Y	P2RY8	0	7.7341	0	6.8746
ENSG00000182162.11_4_PAR_Y	P2RY8	0	7.7341	0	6.8746
ENSG00000182162.11_4_PAR_Y	P2RY8	0	7.7341	0	0
ENSG00000182162.11_4_PAR_Y	P2RY8	0	7.7341	0	0
ENSG00000182162.11_4_PAR_Y	P2RY8	0	0	0.4584	0
ENSG00000182162.11_4_PAR_Y	P2RY8	0	0	0.4584	0
ENSG00000182162.11_4_PAR_Y	P2RY8	0	0	0.4584	6.8746
ENSG00000182162.11_4_PAR_Y	P2RY8	0	0	0.4584	6.8746
ENSG00000182162.11_4_PAR_Y	P2RY8	0	0	0	6.8746
ENSG00000182162.11_4_PAR_Y	P2RY8	0	0	0	6.8746
ENSG00000182162.11_4_PAR_Y	P2RY8	0	0	0	0
ENSG00000182162.11_4_PAR_Y	P2RY8	0	0	0	0
ENSG00000198807.12_2	PAX9	2.454	0	0.4871	0.108
ENSG00000226887.8_4	ERVMER34-1	0.3858	0	0.5481	0.0225
ENSG00000204128.6_3	C2orf72	0.1289	0	0.7346	0.1276
ENSG00000244219.7_5	TMEM225B	0.3889	0	0.3958	0.2962
ENSG00000249884.8_3	RNF103-CHMP3	0.1284	0	0.2336	0.2225
ENSG00000173389.16_3	IQCF1	0.1281	0	0	0
ENSG00000177994.16_4	C2orf73	0.1281	0	0.1413	0
ENSG00000104435.13_2	STMN2	0.3897	0	0	0
ENSG00000049247.13_2	UTS2	0.3899	0	0	0
ENSG00000185681.13_4	MORN5	0.39	0	0.043	0.1288
ENSG00000285551.1_2	AC067752.1	0.1256	0	0	0
ENSG00000137875.4_3	BCL2L10	0.3904	0	0.2185	0.0297
ENSG00000121871.4_4	SLITRK3	0.1276	0	0	0
ENSG00000172551.11_3	MUCL1	0.1276	0	0	0
ENSG00000132639.12_3	SNAP25	2.4455	0	2.9145	0.722
ENSG00000112818.10_4	MEP1A	0.1274	0	0	0.021
ENSG00000178776.5_6	C5orf46	2.4454	0	0.6112	0.1076
ENSG00000198393.8_3	ZNF26	0.1274	0	0	0.0421
ENSG00000256097.1	LINC00696	0.1266	0	0.0838	0
ENSG00000117834.12_6	SLC5A9	0.1264	0	0.1987	0.0626
ENSG00000117501.14_5	MROH9	0.1258	0	0.037	0.0277
ENSG00000276302.1_6	AL021997.3	0.3913	0	0.037	0.2768
ENSG00000187151.7_4	ANGPTL5	0.1259	0	0	0
ENSG00000162753.13_4	SLC9C2	0.3919	0	0.1441	0.0863
ENSG00000127329.15_5	PTPRB	14.7362	0	0.662	0.2098
ENSG00000166268.11_4	MYRFL	0.3541	0	0.6248	0.2104
ENSG00000176153.12_3	GPX2	0.1689	0	0.0894	0
ENSG00000176029.14_4	C11orf16	0.3286	0	0	0
ENSG00000241935.9_4	HOGA1	0.3226	0	0.0464	0.0139
ENSG00000225940.6_5	C5orf67	0.1622	0	0.2146	0.2409
ENSG00000269103.1	AC002472.1	0.1622	0	0	0
ENSG00000127083.7_2	OMD	13.1341	0	0.0084	0
ENSG00000169064.12_2	ZBBX	4.1877	0	0.4664	0.2464
ENSG00000273079.5_5	GRIN2B	8.2885	0	1.0375	0.2218
ENSG00000127252.7_6	PLAAT1	2.5707	0	0.7867	0.1591
ENSG00000205409.3_6	OR52E6	0.3237	0	0	0
ENSG00000156510.13_3	HKDC1	7.5317	0	12.8766	3.2539
ENSG00000145248.7_4	SLC10A4	0.1619	0	0.0536	0.016
ENSG00000170477.13_3	KRT4	0.3244	0	48.502	5.5142
ENSG00000203756.8_4	TMEM244	0.1619	0	0	0
ENSG00000249751.1	ECSCR	14.5591	0	0	0
ENSG00000152595.16_3	MEPE	0.1613	0	0.0194	0.1743
ENSG00000269586.7_2	CT45A10	0.1613	0	0	0
ENSG00000137976.7_3	DNASE2B	2.5689	0	0	0
ENSG00000163737.4_3	PF4	0.1611	0	0.08	0
ENSG00000055813.6_4	CCDC85A	0.3255	0	1.7928	0.2698
ENSG00000164128.7_6	NPY1R	2.5638	0	2.8455	0.4095
ENSG00000170819.5_4	BFSP2	0.1605	0	0	0
ENSG00000270882.2_2	HIST2H4A	0.1605	0	0.6637	0.0397
ENSG00000166111.10_4	SVOP	0.3257	0	0	0.3226
ENSG00000269755.1_6	AC008758.6	0.1589	0	0.1752	0
ENSG00000204539.4_3	CDSN	0.1584	0	0.4032	0.1448
ENSG00000001626.15_7	CFTR	0.1579	0	1.7495	0.6253
ENSG00000166535.20_3	A2ML1	0.1578	0	9.2921	1.0939
ENSG00000267552.6_6	AC093227.2	0.3266	0	0	0
ENSG00000204065.3_3	TCEAL5	0.3275	0	0	0.0295
ENSG00000274386.5_5	TMEM269	0.3283	0	0.2354	0.4336
ENSG00000179477.11_5	ALOX12B	0.1622	0	0	0.0402
ENSG00000115353.11_3	TACR1	8.2871	0	1.4438	0.6556
ENSG00000163286.9_5	ALPG	0.1624	0	0.0909	0
ENSG00000126785.13_3	RHOJ	7.5525	0	0.0341	0.0255
ENSG00000177511.6_3	ST8SIA3	0.1686	0	0	0
ENSG00000197106.7_3	SLC6A17	0.3042	0	0.0829	0.0089
ENSG00000198633.10_2	ZNF534	0.3063	0	0.0405	0.0404
ENSG00000156689.7_3	GLYATL2	0.1674	0	0	0.0207
ENSG00000212122.4_4	TSSK1B	0.3067	0	0	0
ENSG00000182111.9_3	ZNF716	0.1673	0	0	0
ENSG00000214336.5_3	FOXI3	0.307	0	1.6758	0.1194
ENSG00000150893.11_3	FREM2	0.3071	0	0.0881	0.022
ENSG00000155875.15_6	SAXO1	0.3077	0	0.75	0.2245
ENSG00000164690.8_3	SHH	0.3087	0	0.2042	0
ENSG00000204936.10_3	CD177	0.1667	0	0.6068	0.0413
ENSG00000284797.1_2	AC008397.1	0.3105	0	0.4696	0.0879
ENSG00000166960.16_5	CCDC178	0.3114	0	0.0485	0
ENSG00000135702.14_6	CHST5	0.1656	0	0	0
ENSG00000156959.9_3	LHFPL4	0.3223	0	0	0
ENSG00000110375.3_3	UPK2	0.1646	0	0.3267	0.0652
ENSG00000104804.8_5	TULP2	0.315	0	0	0.0446
ENSG00000267206.6_4	LCN6	0.1645	0	0.0363	0
ENSG00000187730.9_3	GABRD	0.3157	0	0.0261	0
ENSG00000189058.9_5	APOD	22.6852	0	0	0.0358
ENSG00000129151.9_5	BBOX1	4.1969	0	2.114	0.1877
ENSG00000203795.3_3	FAM24A	0.3173	0	0	0
ENSG00000162383.12_5	SLC1A7	0.1634	0	0.0416	0
ENSG00000065325.13_4	GLP2R	0.3192	0	0.0367	0.0137
ENSG00000104213.12_2	PDGFRL	14.4961	0	4.2701	1.0057
ENSG00000148136.5_3	OR13C4	0.1627	0	0.0215	0
ENSG00000236279.7_5	CLEC2L	0.1627	0	0.0538	0
ENSG00000205755.12_3	CRLF2	0.321	0	0.0265	0
ENSG00000205755.12_3	CRLF2	0.321	0	0.0265	0
ENSG00000205755.12_3	CRLF2	0.321	0	0.0265	0
ENSG00000205755.12_3	CRLF2	0.321	0	0.0265	0
ENSG00000205755.12_3	CRLF2	0.321	0	0	0
ENSG00000205755.12_3	CRLF2	0.321	0	0	0
ENSG00000205755.12_3	CRLF2	0.321	0	0	0
ENSG00000205755.12_3	CRLF2	0.321	0	0	0
ENSG00000205755.12_3	CRLF2	0.321	0.3599	0.0265	0
ENSG00000205755.12_3	CRLF2	0.321	0.3599	0.0265	0
ENSG00000205755.12_3	CRLF2	0.321	0.3599	0.0265	0
ENSG00000205755.12_3	CRLF2	0.321	0.3599	0.0265	0
ENSG00000205755.12_3	CRLF2	0.321	0.3599	0	0
ENSG00000205755.12_3	CRLF2	0.321	0.3599	0	0
ENSG00000205755.12_3	CRLF2	0.321	0.3599	0	0
ENSG00000205755.12_3	CRLF2	0.321	0.3599	0	0
ENSG00000205755.12_3_PAR_Y	CRLF2	0	0.3599	0.0265	0
ENSG00000205755.12_3_PAR_Y	CRLF2	0	0.3599	0.0265	0
ENSG00000205755.12_3_PAR_Y	CRLF2	0	0.3599	0.0265	0
ENSG00000205755.12_3_PAR_Y	CRLF2	0	0.3599	0.0265	0
ENSG00000205755.12_3_PAR_Y	CRLF2	0	0.3599	0	0
ENSG00000205755.12_3_PAR_Y	CRLF2	0	0.3599	0	0
ENSG00000205755.12_3_PAR_Y	CRLF2	0	0.3599	0	0
ENSG00000205755.12_3_PAR_Y	CRLF2	0	0.3599	0	0
ENSG00000205755.12_3_PAR_Y	CRLF2	0	0	0.0265	0
ENSG00000205755.12_3_PAR_Y	CRLF2	0	0	0.0265	0
ENSG00000205755.12_3_PAR_Y	CRLF2	0	0	0.0265	0
ENSG00000205755.12_3_PAR_Y	CRLF2	0	0	0.0265	0
ENSG00000205755.12_3_PAR_Y	CRLF2	0	0	0	0
ENSG00000205755.12_3_PAR_Y	CRLF2	0	0	0	0
ENSG00000205755.12_3_PAR_Y	CRLF2	0	0	0	0
ENSG00000205755.12_3_PAR_Y	CRLF2	0	0	0	0
ENSG00000147223.6_5	RIPPLY1	0.1571	0	0	0
ENSG00000116783.15_5	TNNI3K	0.3293	0	0	0.0932
ENSG00000052850.8_5	ALX4	0.3534	0	0	0
ENSG00000166143.9_2	PPP1R14D	0.3313	0	0.5205	0.246
ENSG00000214717.12_5	ZBED1	14.7151	0	11.5015	0
ENSG00000214717.12_5	ZBED1	14.7151	0	11.5015	0
ENSG00000214717.12_5	ZBED1	14.7151	0	11.5015	18.8471
ENSG00000214717.12_5	ZBED1	14.7151	0	11.5015	18.8471
ENSG00000214717.12_5	ZBED1	14.7151	0	0	18.8471
ENSG00000214717.12_5	ZBED1	14.7151	0	0	18.8471
ENSG00000214717.12_5	ZBED1	14.7151	0	0	0
ENSG00000214717.12_5	ZBED1	14.7151	0	0	0
ENSG00000214717.12_5	ZBED1	14.7151	21.6428	11.5015	0
ENSG00000214717.12_5	ZBED1	14.7151	21.6428	11.5015	0
ENSG00000214717.12_5	ZBED1	14.7151	21.6428	11.5015	18.8471
ENSG00000214717.12_5	ZBED1	14.7151	21.6428	11.5015	18.8471
ENSG00000214717.12_5	ZBED1	14.7151	21.6428	0	18.8471
ENSG00000214717.12_5	ZBED1	14.7151	21.6428	0	18.8471
ENSG00000214717.12_5	ZBED1	14.7151	21.6428	0	0
ENSG00000214717.12_5	ZBED1	14.7151	21.6428	0	0
ENSG00000214717.12_5_PAR_Y	ZBED1	0	21.6428	11.5015	0
ENSG00000214717.12_5_PAR_Y	ZBED1	0	21.6428	11.5015	0
ENSG00000214717.12_5_PAR_Y	ZBED1	0	21.6428	11.5015	18.8471
ENSG00000214717.12_5_PAR_Y	ZBED1	0	21.6428	11.5015	18.8471
ENSG00000214717.12_5_PAR_Y	ZBED1	0	21.6428	0	18.8471
ENSG00000214717.12_5_PAR_Y	ZBED1	0	21.6428	0	18.8471
ENSG00000214717.12_5_PAR_Y	ZBED1	0	21.6428	0	0
ENSG00000214717.12_5_PAR_Y	ZBED1	0	21.6428	0	0
ENSG00000214717.12_5_PAR_Y	ZBED1	0	0	11.5015	0
ENSG00000214717.12_5_PAR_Y	ZBED1	0	0	11.5015	0
ENSG00000214717.12_5_PAR_Y	ZBED1	0	0	11.5015	18.8471
ENSG00000214717.12_5_PAR_Y	ZBED1	0	0	11.5015	18.8471
ENSG00000214717.12_5_PAR_Y	ZBED1	0	0	0	18.8471
ENSG00000214717.12_5_PAR_Y	ZBED1	0	0	0	18.8471
ENSG00000214717.12_5_PAR_Y	ZBED1	0	0	0	0
ENSG00000214717.12_5_PAR_Y	ZBED1	0	0	0	0
ENSG00000138315.13_3	OIT3	0.147	0	0.3135	0.1133
ENSG00000161649.13_3	CD300LG	0.1469	0	0.0194	0
ENSG00000163032.12_4	VSNL1	13.0668	0	0	0
ENSG00000275591.5_3	XKR5	0.3418	0	0.337	0.0702
ENSG00000176601.13_5	MAP3K19	0.3422	0	0.0849	0
ENSG00000172476.4_4	RAB40A	0.3422	0	0.0243	0.0363
ENSG00000188133.6_3	TMEM215	0.1457	0	0	0
ENSG00000071909.18_4	MYO3B	0.3446	0	1.3484	0.3784
ENSG00000256061.7_8	DNAAF4	0.3448	0	0.0713	0.2134
ENSG00000143921.9_5	ABCG8	0.3462	0	0.0067	0.0202
ENSG00000163705.13_4	FANCD2OS	0.1455	0	0	0
ENSG00000104901.7_5	DKKL1	0.3479	0	2.1293	0.2153
ENSG00000171433.12_5	GLOD5	0.1453	0	2.1147	0.3837
ENSG00000101251.12_5	SEL1L2	0.1451	0	0	0
ENSG00000168412.6_3	MTNR1A	0.1449	0	0	0.0239
ENSG00000146147.15_5	MLIP	0.1447	0	1.1297	0.2006
ENSG00000167414.4_4	GNG8	0.1442	0	0	0
ENSG00000173253.15_4	DMRT2	0.3486	0	0	0.0157
ENSG00000144410.5_3	CPO	0.3501	0	0.1324	0.1734
ENSG00000180113.16_3	TDRD6	0.1437	0	0.0881	0.0312
ENSG00000166292.12_4	TMEM100	8.3517	0	9.3271	1.0996
ENSG00000070985.13_3	TRPM5	0.3504	0	0.0221	0.0248
ENSG00000104892.17_5	KLC3	2.5242	0	6.9026	1.0664
ENSG00000136267.13_5	DGKB	0.1431	0	0.0631	0.0472
ENSG00000182103.5_3	FAM181B	0.1428	0	0.0787	0.0314
ENSG00000135697.10_3	BCO1	0.3521	0	0.6657	0.0664
ENSG00000223572.9_2	CKMT1A	3.0004	0	0.0662	0
ENSG00000283632.2_2	EXOC3L2	2.5243	0	0	0
ENSG00000267673.6_6	FDX2	0.1471	0	0.0324	0.1457
ENSG00000174792.10_4	ODAPH	0.1471	0	0.1298	0.0486
ENSG00000069122.19_4	ADGRF5	14.6858	0	2.1469	0.3538
ENSG00000161682.15_3	FAM171A2	7.4854	0	10.6971	2.0659
ENSG00000102468.10_2	HTR2A	0.1569	0	0.0087	0
ENSG00000107807.13_4	TLX1	0.332	0	0	0
ENSG00000145777.15_3	TSLP	0.1551	0	0.0158	0.0473
ENSG00000176692.8_6	FOXC2	0.3329	0	0	0
ENSG00000173662.21_4	TAS1R1	0.1522	0	0.0112	0
ENSG00000176907.5_4	TCIM	13.1089	0	0.7209	0.0506
ENSG00000119938.9_3	PPP1R3C	2.9655	0	0.1216	0
ENSG00000101883.5_3	RHOXF1	0.3335	0	0.0276	0
ENSG00000163283.7_4	ALPP	2.5572	0	2.538	0.1986
ENSG00000174343.6_3	CHRNA9	0.1502	0	0.1656	0
ENSG00000163898.10_3	LIPH	0.336	0	24.864	3.6605
ENSG00000159261.12_6	CLDN14	0.15	0	0	0
ENSG00000166091.21_4	CMTM5	0.1499	0	0	0
ENSG00000205549.9_3	C9orf92	0.3366	0	0.3341	0.0833
ENSG00000162267.12_3	ITIH3	7.4444	0	0.05	0.0748
ENSG00000131142.13_2	CCL25	0.1493	0	0.0494	0
ENSG00000251503.8_6	CENPS-CORT	0.1492	0	0	0
ENSG00000083782.8_3	EPYC	85.8461	0	0	0
ENSG00000237289.9_2	CKMT1B	8.3189	0	0.3075	0.3222
ENSG00000122691.13_5	TWIST1	32.9882	0	0.4197	0.1571
ENSG00000141316.13_3	SPACA3	0.1485	0	0	0
ENSG00000159289.6_3	GOLGA6A	0.3378	0	0.2608	0.1115
ENSG00000196748.10_5	CLPSL2	0.3407	0	0	0
ENSG00000183833.16_4	MAATS1	4.1561	0	0.9385	0.588
ENSG00000179256.2_3	SMCO3	0.148	0	0	0
ENSG00000135773.13_3	CAPN9	0.1471	0	0.177	0.0927
ENSG00000169575.5_3	VPREB1	0.1471	0	0	0
ENSG00000223658.8_5	C1GALT1C1L	0.3408	0	0.596	0.1206
ENSG00000188611.15_3	ASAH2	0.6701	0	0.9999	0.2118
ENSG00000133640.20_5	LRRIQ1	6.7105	0	0.3532	0.4028
ENSG00000233493.4_3	TMEM238	0.672	0	3.9427	0.6212
ENSG00000127588.5_3	GNG13	0.0316	0	0.0418	0
ENSG00000283288.1_5	SMIM33	0.024	0	0	0.0476
ENSG00000107859.10_3	PITX3	0.0238	0	0.0158	0
ENSG00000162598.13_4	C1orf87	0.0238	0	0.1419	0
ENSG00000283526.1_5	PRRT1B	0.0237	0	0.1099	0
ENSG00000165566.12_3	AMER2	0.0235	0	0	0.0047
ENSG00000112164.6_3	GLP1R	0.0233	0	0.0123	0.0046
ENSG00000100253.13_4	MIOX	0.0232	0	0.0308	0.023
ENSG00000205838.14_6	TTC23L	1.1792	0	0.4007	0.1578
ENSG00000127325.19_5	BEST3	0.0231	0	0.0306	0
ENSG00000130045.16_3	NXNL2	5.817	0	8.0147	2.6093
ENSG00000124092.12_4	CTCFL	1.1875	0	28.5687	4.2139
ENSG00000138083.5_3	SIX3	0.023	0	0	0
ENSG00000181408.3_2	UTS2R	0.0229	0	0	0
ENSG00000128655.18_6	PDE11A	1.1897	0	0.462	0
ENSG00000128655.18_6	PDE11A	1.1897	0	0.462	0
ENSG00000128655.18_6	PDE11A	1.1897	0	0.462	0.2561
ENSG00000128655.18_6	PDE11A	1.1897	0	0.462	0.2561
ENSG00000128655.18_6	PDE11A	1.1897	0	0	0.2561
ENSG00000128655.18_6	PDE11A	1.1897	0	0	0.2561
ENSG00000128655.18_6	PDE11A	1.1897	0	0	0
ENSG00000128655.18_6	PDE11A	1.1897	0	0	0
ENSG00000128655.18_6	PDE11A	1.1897	0.0663	0.462	0
ENSG00000128655.18_6	PDE11A	1.1897	0.0663	0.462	0
ENSG00000128655.18_6	PDE11A	1.1897	0.0663	0.462	0.2561
ENSG00000128655.18_6	PDE11A	1.1897	0.0663	0.462	0.2561
ENSG00000128655.18_6	PDE11A	1.1897	0.0663	0	0.2561
ENSG00000128655.18_6	PDE11A	1.1897	0.0663	0	0.2561
ENSG00000128655.18_6	PDE11A	1.1897	0.0663	0	0
ENSG00000128655.18_6	PDE11A	1.1897	0.0663	0	0
ENSG00000284741.1_3	PDE11A	0	0.0663	0.462	0
ENSG00000284741.1_3	PDE11A	0	0.0663	0.462	0
ENSG00000284741.1_3	PDE11A	0	0.0663	0.462	0.2561
ENSG00000284741.1_3	PDE11A	0	0.0663	0.462	0.2561
ENSG00000284741.1_3	PDE11A	0	0.0663	0	0.2561
ENSG00000284741.1_3	PDE11A	0	0.0663	0	0.2561
ENSG00000284741.1_3	PDE11A	0	0.0663	0	0
ENSG00000284741.1_3	PDE11A	0	0.0663	0	0
ENSG00000284741.1_3	PDE11A	0	0	0.462	0
ENSG00000284741.1_3	PDE11A	0	0	0.462	0
ENSG00000284741.1_3	PDE11A	0	0	0.462	0.2561
ENSG00000284741.1_3	PDE11A	0	0	0.462	0.2561
ENSG00000284741.1_3	PDE11A	0	0	0	0.2561
ENSG00000284741.1_3	PDE11A	0	0	0	0.2561
ENSG00000284741.1_3	PDE11A	0	0	0	0
ENSG00000284741.1_3	PDE11A	0	0	0	0
ENSG00000162763.3_2	LRRC52	0.0227	0	0	0
ENSG00000187902.11_7	SHISA7	0.0224	0	0	0
ENSG00000242950.7_3	ERVW-1	0.0223	0	0.0074	0.011
ENSG00000168772.11_3	CXXC4	1.7509	0	0.0987	0.0591
ENSG00000174279.4_2	EVX2	0.0222	0	0	0
ENSG00000112096.18_5	SOD2	364.421	0	227.16	0
ENSG00000112096.18_5	SOD2	364.421	0	227.16	0
ENSG00000112096.18_5	SOD2	364.421	0	227.16	255.486
ENSG00000112096.18_5	SOD2	364.421	0	227.16	255.486
ENSG00000112096.18_5	SOD2	364.421	0	0	255.486
ENSG00000112096.18_5	SOD2	364.421	0	0	255.486
ENSG00000112096.18_5	SOD2	364.421	0	0	0
ENSG00000112096.18_5	SOD2	364.421	0	0	0
ENSG00000112096.18_5	SOD2	364.421	522.527	227.16	0
ENSG00000112096.18_5	SOD2	364.421	522.527	227.16	0
ENSG00000112096.18_5	SOD2	364.421	522.527	227.16	255.486
ENSG00000112096.18_5	SOD2	364.421	522.527	227.16	255.486
ENSG00000112096.18_5	SOD2	364.421	522.527	0	255.486
ENSG00000112096.18_5	SOD2	364.421	522.527	0	255.486
ENSG00000112096.18_5	SOD2	364.421	522.527	0	0
ENSG00000112096.18_5	SOD2	364.421	522.527	0	0
ENSG00000285441.1_2	SOD2	0	522.527	227.16	0
ENSG00000285441.1_2	SOD2	0	522.527	227.16	0
ENSG00000285441.1_2	SOD2	0	522.527	227.16	255.486
ENSG00000285441.1_2	SOD2	0	522.527	227.16	255.486
ENSG00000285441.1_2	SOD2	0	522.527	0	255.486
ENSG00000285441.1_2	SOD2	0	522.527	0	255.486
ENSG00000285441.1_2	SOD2	0	522.527	0	0
ENSG00000285441.1_2	SOD2	0	522.527	0	0
ENSG00000285441.1_2	SOD2	0	0	227.16	0
ENSG00000285441.1_2	SOD2	0	0	227.16	0
ENSG00000285441.1_2	SOD2	0	0	227.16	255.486
ENSG00000285441.1_2	SOD2	0	0	227.16	255.486
ENSG00000285441.1_2	SOD2	0	0	0	255.486
ENSG00000285441.1_2	SOD2	0	0	0	255.486
ENSG00000285441.1_2	SOD2	0	0	0	0
ENSG00000285441.1_2	SOD2	0	0	0	0
ENSG00000233932.6_7	CTXN2	0.0222	0	0.0368	0
ENSG00000186038.9_6	HTR3E	0.0221	0	0	0
ENSG00000082482.13_7	KCNK2	5.2416	0	8.3612	1.6189
ENSG00000186075.12_2	ZPBP2	0.0221	0	0	0
ENSG00000108576.10_5	SLC6A4	0.022	0	0	0
ENSG00000167646.13_7	DNAAF3	1.1996	0	2.1396	0.6198
ENSG00000276409.5_4	CCL14	1.2012	0	0	0
ENSG00000203546.7_6	AL139353.1	1.2056	0	0.11	0.247
ENSG00000215475.5_3	SIAH3	0.022	0	0.2271	0.0959
ENSG00000215817.7_6	ZC3H11B	0.0241	0	0.0106	0.0238
ENSG00000155816.20_4	FMN2	1.7528	0	0.1364	0
ENSG00000203985.11_3	LDLRAD1	1.7533	0	0.6032	0.2084
ENSG00000048462.11_5	TNFRSF17	1.7713	0	0.0617	0
ENSG00000168131.4_3	OR2B2	0.0257	0	0	0
ENSG00000167858.13_3	TEKT1	1.142	0	0.0504	0
ENSG00000183317.17_5	EPHA10	1.7749	0	6.2529	1.4493
ENSG00000204869.8_4	IGFL4	1.1499	0	0.0304	0
ENSG00000205238.9_2	SPDYE2	0.0255	0	0	0
ENSG00000115850.10_3	LCT	0.0255	0	0.2696	0.0694
ENSG00000120088.14_3	CRHR1	0.0251	0	0	0
ENSG00000235711.4_2	ANKRD34C	0.0252	0	0.0125	0
ENSG00000101890.5_3	GUCY2F	0.0251	0	0	0
ENSG00000121314.2_2	TAS2R8	0.0251	0	0.0994	0.0992
ENSG00000181778.4_2	TMEM252	0.025	0	0.0165	0.0248
ENSG00000196184.10_7	OR10J1	0.025	0	0	0
ENSG00000177990.12_4	DPY19L2	5.225	0	0.2336	0.3846
ENSG00000141485.16_5	SLC13A5	1.1499	0	0.1065	0
ENSG00000196289.7_4	BECN2	0.024	0	0.0318	0
ENSG00000260802.1_5	SERTM2	0.0249	0	0	0
ENSG00000267795.6_3	SMIM22	20.3289	0	60.2004	5.254
ENSG00000138892.11_5	TTLL8	0.0249	0	0	0
ENSG00000165794.10_3	SLC39A2	0.0247	0	0.0164	0.0735
ENSG00000178772.7_3	CPN2	0.0248	0	0	0
ENSG00000120324.9_3	PCDHB10	1.1529	0	0.0688	0.0374
ENSG00000185565.12_4	LSAMP	49.7723	0	2.4552	0.4793
ENSG00000269832.1	AL627171.2	0.0246	0	0.0325	0.0244
ENSG00000215612.8_5	HMX1	0.0243	0	0	0
ENSG00000134323.12_3	MYCN	1.157	0	5.043	0.3294
ENSG00000182521.5_5	TBPL2	0.024	0	0.0159	0
ENSG00000104313.20_5	EYA1	1.1633	0	0.0069	0
ENSG00000140297.13_6	GCNT3	1.1664	0	4.1608	0.4018
ENSG00000179071.5_3	CCDC89	1.2068	0	4.7295	0.9587
ENSG00000113211.5_2	PCDHB6	1.2086	0	0.0701	0.0105
ENSG00000101180.16_3	HRH3	0.0219	0	0.0145	0
ENSG00000285854.1_1	AC010197.2	0.0195	0	0.0129	0
ENSG00000174521.7_2	TTC9B	0.0197	0	0	0
ENSG00000214860.5_4	EVPLL	1.2304	0	0.8297	0.3046
ENSG00000214290.8_5	COLCA2	1.7285	0	0.6316	0.4088
ENSG00000239388.9_5	ASB14	0.0196	0	0	0.0194
ENSG00000186190.7_2	BPIFB3	9.9153	0	0	0
ENSG00000130176.8_4	CNN1	47.9386	0	0.4564	0.244
ENSG00000154493.19_6	C10orf90	0.0195	0	0	0
ENSG00000270885.2_3	RASL10B	1.2365	0	2.558	0.3967
ENSG00000162814.11_3	SPATA17	1.7278	0	8.3432	2.3665
ENSG00000169006.7_4	NTSR2	0.0195	0	0	0
ENSG00000196109.9_5	ZNF676	1.7247	0	0.4729	0.2924
ENSG00000004848.8_5	ARX	1.2455	0	0	0
ENSG00000180043.11_4	FAM71E2	0.0195	0	0.0065	0
ENSG00000125409.13_5	TEKT3	1.2488	0	0.0826	0.2061
ENSG00000166509.12_4	CLEC3A	0.0199	0	0	0
ENSG00000125850.11_4	OVOL2	3.5856	0	16.6278	2.9902
ENSG00000160963.14_3	COL26A1	3.5868	0	1.9499	0.3427
ENSG00000106302.10_4	HYAL4	0.0194	0	0	0.0192
ENSG00000110675.13_4	ELMOD1	1.2494	0	0	0
ENSG00000170807.12_4	LMOD2	0.0194	0	0	0
ENSG00000172365.3_4	OR5B2	0.0193	0	0	0
ENSG00000019186.10_3	CYP24A1	1.7234	0	5.9334	0.5786
ENSG00000072657.9_4	TRHDE	3.5888	0	21.1963	2.5088
ENSG00000132746.14_3	ALDH3B2	10.6103	0	50.432	8.1917
ENSG00000221843.4_2	C2orf16	0.0193	0	0.0055	0
ENSG00000268089.3_3	GABRQ	0.0193	0	3.1375	0.3337
ENSG00000109424.4_3	UCP1	0.0192	0	0	0
ENSG00000173627.8_3	APOBEC4	0.0191	0	0.0126	0
ENSG00000179148.9_2	ALOXE3	0.0199	0	0.0659	0.0591
ENSG00000139200.13_3	PIANP	1.2302	0	0.0281	0.021
ENSG00000182450.13_4	KCNK4	0.0219	0	0	0.0217
ENSG00000244234.2_4	GMCL2	0.0213	0	0.0141	0
ENSG00000204928.2_2	GRXCR2	0.0219	0	0.058	0
ENSG00000117281.16_4	CD160	0.0219	0	0.2602	0.2597
ENSG00000172458.4_3	IL17D	1.2116	0	0.2245	0.096
ENSG00000170561.13_3	IRX2	0.0218	0	0	0
ENSG00000123165.8_3	ACTRT1	0.0217	0	0	0
ENSG00000151360.10_3	ALLC	0.0216	0	0.2288	0.0428
ENSG00000114455.13_3	HHLA2	0.0214	0	2.0079	0.508
ENSG00000159263.16_4	SIM2	1.2121	0	0.0553	0
ENSG00000143340.6_2	FAM163A	0.0214	0	0.0142	0
ENSG00000006555.11_6	TTC22	5.7378	0	21.2258	3.4725
ENSG00000241149.3_5	AC115220.1	0.0214	0	0	0
ENSG00000119698.12_3	PPP4R4	3.7817	0	1.0399	0.2432
ENSG00000187010.21_8	RHD	0.0212	0	0	0
ENSG00000169327.5_5	OR5AU1	0.0209	0	0.0276	0.0207
ENSG00000205363.5_3	INSYN1	1.7331	0	0.1749	0.0582
ENSG00000129455.15_3	KLK8	9.8869	0	65.7555	9.0597
ENSG00000220948.5_4	TRIM51GP	0.0209	0	0	0
ENSG00000205090.9_3	TMEM240	1.2127	0	0.4141	0.0775
ENSG00000187699.10_4	C2orf88	5.7359	0	34.4823	7.4658
ENSG00000150676.12_3	CCDC83	0.0208	0	0.0687	0
ENSG00000285188.1_2	AC008397.2	0.0208	0	0.2343	0.0825
ENSG00000187545.5_3	PRAMEF10	0.0205	0	0	0
ENSG00000164256.10_5	PRDM9	0.0203	0	0.0134	0
ENSG00000118432.12_4	CNR1	1.2254	0	0.1994	0.2785
ENSG00000061492.12_3	WNT8A	0.0201	0	0.0133	0.1195
ENSG00000188869.13_4	TMC3	0.0201	0	0	0
ENSG00000174992.8_3	ZG16	0.02	0	0	0.0099
ENSG00000258083.2_6	OR9A4	0.02	0	0.0265	0.1585
ENSG00000153789.13_5	FAM92B	1.1396	0	0	0.0305
ENSG00000163497.2_2	FEV	0.0257	0	0	0
ENSG00000204172.7	AGAP10	0.0258	0	0.0085	0.0128
ENSG00000184788.13_3	SATL1	0.0296	0	0.0196	0.0195
ENSG00000187045.18_5	TMPRSS6	1.0662	0	0.8966	0.3848
ENSG00000170549.4_3	IRX1	0.0299	0	0	0
ENSG00000181903.5_4	OR4C6	0.03	0	0	0
ENSG00000221890.4_5	NPTXR	3.8307	0	16.4158	3.1375
ENSG00000171501.9_6	OR1N2	0.0297	0	0.059	0.0883
ENSG00000105996.7_3	HOXA2	1.0661	0	0.0112	0
ENSG00000234602.8_3	MCIDAS	0.0298	0	0.7193	0.1622
ENSG00000091664.9_4	SLC17A6	0.0297	0	0	0
ENSG00000113805.8_2	CNTN3	5.9924	0	2.8503	0.9406
ENSG00000144278.15_4	GALNT13	10.9007	0	28.1063	4.9862
ENSG00000150750.8_4	C11orf53	0.0297	0	0	0
ENSG00000256045.3_3	MTRNR2L10	0.0296	0	0	0.0293
ENSG00000127903.14_4	ZNF835	1.0705	0	1.3957	0.6704
ENSG00000154118.13_3	JPH3	1.0723	0	0.0133	0
ENSG00000100842.13_3	EFS	6.0093	0	6.1738	1.2902
ENSG00000254852.8_4	NPIPA2	0.0296	0	0.0783	0.0586
ENSG00000204882.4_3	GPR20	1.0751	0	0.0132	0
ENSG00000171431.4_3	KRT20	0.0295	0	0.0195	0
ENSG00000180532.10_2	ZSCAN4	0.0295	0	0	0
ENSG00000115423.18_3	DNAH6	3.529	0	0.3663	0.233
ENSG00000273540.4_4	AGBL1	0.0294	0	0.0259	0.0291
ENSG00000104537.17_6	ANXA13	1.0769	0	0.3054	0.0914
ENSG00000110900.15_3	TSPAN11	5.1973	0	0.0456	0
ENSG00000168539.4_4	CHRM1	0.0293	0	0	0
ENSG00000135222.6_2	CSN2	0.0292	0	0	0
ENSG00000136574.17_2	GATA4	0.0293	0	0	0.029
ENSG00000177693.4_3	OR4F4	0.0293	0	0	0
ENSG00000186526.13_7	CYP4F8	0.0291	0	0	0
ENSG00000198099.8_4	ADH4	1.0542	0	0	0
ENSG00000155511.18_3	GRIA1	0.0301	0	0.01	0.0447
ENSG00000215397.4_4	SCRT2	0.0292	0	0	0.0385
ENSG00000109625.19_4	CPZ	1.0311	0	0	0.034
ENSG00000242173.10_5	ARHGDIG	1.0091	0	0.4054	0.2498
ENSG00000157851.17_3	DPYSL5	0.0316	0	0.0104	0
ENSG00000148702.15_4	HABP2	0.0314	0	0.0208	0
ENSG00000162897.16_5	FCAMR	0.0314	0	0.052	0.0778
ENSG00000180828.3_3	BHLHE22	1.0115	0	0.1326	0.0095
ENSG00000174332.5_2	GLIS1	1.0195	0	0.022	0
ENSG00000146857.4_3	STRA8	0.0314	0	0	0.0621
ENSG00000277494.2_3	GPIHBP1	1.0214	0	0	0
ENSG00000149021.7_4	SCGB1A1	1.0288	0	0	0
ENSG00000156006.5_3	NAT2	0.0311	0	0.8653	0.2467
ENSG00000173826.14_3	KCNH6	0.0312	0	0	0.0103
ENSG00000113905.4_2	HRG	0.0309	0	0.0409	0.0153
ENSG00000183760.11_7	ACP7	0.0309	0	0.0102	0
ENSG00000170373.8_2	CST1	6.0693	0	0	0
ENSG00000176204.13_3	LRRTM4	1.0532	0	2.4298	1.1528
ENSG00000232478.4	CT45A1	0.0308	0	0	0
ENSG00000221836.3_4	OR2A5	0.0307	0	0.0203	0
ENSG00000079393.20_7	DUSP13	0.0306	0	0	0
ENSG00000055118.15_3	KCNH2	5.1722	0	6.3249	0.9643
ENSG00000181323.8_4	SPEM1	0.0306	0	0	0
ENSG00000135406.14_4	PRPH	1.0379	0	0.0981	0.0367
ENSG00000167614.14_4	TTYH1	1.0437	0	0.1439	0.0431
ENSG00000184478.7_4	OR56A3	0.0305	0	0	0
ENSG00000100557.9_4	CCDC198	0.0302	0	0	0
ENSG00000274443.4_4	C8orf89	1.0441	0	0	0
ENSG00000204967.6	PCDHA4	1.0472	0	1.3758	0.2
ENSG00000120436.3_2	GPR31	0.0302	0	0.06	0.0449
ENSG00000159212.12_2	CLIC6	1.048	0	0.7149	0.185
ENSG00000137857.17_3	DUOX1	5.9566	0	2.4358	0.8861
ENSG00000231256.8_5	CFAP97D1	0.0291	0	0.0674	0.0144
ENSG00000109061.10_3	MYH1	0.0258	0	0	0
ENSG00000123500.10_7	COL10A1	50.5364	0	0	0
ENSG00000165186.12_4	PTCHD1	0.0274	0	2.1419	0.4845
ENSG00000244588.5_3	RAD21L1	0.0274	0	0	0
ENSG00000180777.14_4	ANKRD30B	0.0272	0	0.0601	0.009
ENSG00000139209.16_5	SLC38A4	1.8022	0	0.9937	0.4297
ENSG00000244474.5_3	UGT1A4	0.0272	0	0.009	0
ENSG00000182732.18_4	RGS6	3.5412	0	3.2722	1.1287
ENSG00000167941.3_4	SOST	0.0271	0	0	0
ENSG00000205426.10_3	KRT81	1.1244	0	0.012	0
ENSG00000186212.4_3	SOWAHB	1.1307	0	2.198	0.4247
ENSG00000164176.13_5	EDIL3	18.3066	0	6.5681	0.8045
ENSG00000182378.14_7	PLCXD1	26.4699	0	66.125	0
ENSG00000182378.14_7	PLCXD1	26.4699	0	66.125	0
ENSG00000182378.14_7	PLCXD1	26.4699	0	66.125	24.1126
ENSG00000182378.14_7	PLCXD1	26.4699	0	66.125	24.1126
ENSG00000182378.14_7	PLCXD1	26.4699	0	0	24.1126
ENSG00000182378.14_7	PLCXD1	26.4699	0	0	24.1126
ENSG00000182378.14_7	PLCXD1	26.4699	0	0	0
ENSG00000182378.14_7	PLCXD1	26.4699	0	0	0
ENSG00000182378.14_7	PLCXD1	26.4699	65.7973	66.125	0
ENSG00000182378.14_7	PLCXD1	26.4699	65.7973	66.125	0
ENSG00000182378.14_7	PLCXD1	26.4699	65.7973	66.125	24.1126
ENSG00000182378.14_7	PLCXD1	26.4699	65.7973	66.125	24.1126
ENSG00000182378.14_7	PLCXD1	26.4699	65.7973	0	24.1126
ENSG00000182378.14_7	PLCXD1	26.4699	65.7973	0	24.1126
ENSG00000182378.14_7	PLCXD1	26.4699	65.7973	0	0
ENSG00000182378.14_7	PLCXD1	26.4699	65.7973	0	0
ENSG00000182378.14_7_PAR_Y	PLCXD1	0	65.7973	66.125	0
ENSG00000182378.14_7_PAR_Y	PLCXD1	0	65.7973	66.125	0
ENSG00000182378.14_7_PAR_Y	PLCXD1	0	65.7973	66.125	24.1126
ENSG00000182378.14_7_PAR_Y	PLCXD1	0	65.7973	66.125	24.1126
ENSG00000182378.14_7_PAR_Y	PLCXD1	0	65.7973	0	24.1126
ENSG00000182378.14_7_PAR_Y	PLCXD1	0	65.7973	0	24.1126
ENSG00000182378.14_7_PAR_Y	PLCXD1	0	65.7973	0	0
ENSG00000182378.14_7_PAR_Y	PLCXD1	0	65.7973	0	0
ENSG00000182378.14_7_PAR_Y	PLCXD1	0	0	66.125	0
ENSG00000182378.14_7_PAR_Y	PLCXD1	0	0	66.125	0
ENSG00000182378.14_7_PAR_Y	PLCXD1	0	0	66.125	24.1126
ENSG00000182378.14_7_PAR_Y	PLCXD1	0	0	66.125	24.1126
ENSG00000182378.14_7_PAR_Y	PLCXD1	0	0	0	24.1126
ENSG00000182378.14_7_PAR_Y	PLCXD1	0	0	0	24.1126
ENSG00000182378.14_7_PAR_Y	PLCXD1	0	0	0	0
ENSG00000182378.14_7_PAR_Y	PLCXD1	0	0	0	0
ENSG00000171956.7_3	FOXB1	1.1367	0	0	0
ENSG00000180878.3_3	C11orf42	0.027	0	0	0
ENSG00000007216.14_5	SLC13A2	0.0268	0	0	0
ENSG00000205867.3_3	KRTAP5-2	0.0279	0	0	0
ENSG00000095596.12_4	CYP26A1	1.1382	0	0.0538	0
ENSG00000186628.12_4	FSD2	0.0264	0	0.0525	0.0393
ENSG00000185313.8_7	SCN10A	0.0264	0	0	0
ENSG00000130540.14_3	SULT4A1	1.7827	0	3.4338	0.9547
ENSG00000173376.14_3	NDNF	5.2177	0	2.8677	0.0417
ENSG00000140067.6_4	FAM181A	3.8052	0	3.1737	0.2654
ENSG00000170128.5_4	GPR25	0.026	0	0.0172	0.0257
ENSG00000169218.14_3	RSPO1	3.5464	0	0.3266	0.1029
ENSG00000188263.10_2	IL17REL	0.0261	0	0.0747	0.043
ENSG00000088320.4_3	REM1	1.782	0	1.5142	0.1858
ENSG00000196972.9_4	SMIM10L2B	1.1385	0	3.1303	0.5254
ENSG00000253767.2_4	PCDHGA8	1.7811	0	0.5353	0.1947
ENSG00000129221.16_5	AIPL1	0.0259	0	0.1543	0
ENSG00000161103.7	AC008132.13	0.0277	0	2.6945	0.3567
ENSG00000152467.10_4	ZSCAN1	1.1121	0	0.9739	0.4535
ENSG00000181626.12_3	ANKRD62	0.029	0	0.072	0.0431
ENSG00000156076.10_4	WIF1	1.0964	0	0	0
ENSG00000248485.2_3	PCP4L1	1.0852	0	0.1612	0
ENSG00000229544.9_3	NKX1-2	0.0291	0	0.0064	0
ENSG00000149972.11_5	CNTN5	1.086	0	4.891	0.6688
ENSG00000146374.14_4	RSPO3	18.1759	0	0.1278	0.0239
ENSG00000135502.18_4	SLC26A10	1.0887	0	0	0
ENSG00000261832.6_6	AC138894.1	0.0291	0	0	0.0144
ENSG00000130055.13_2	GDPD2	0.0287	0	0.3325	0.0142
ENSG00000235631.2_4	RNF148	1.8141	0	0.4132	0.2651
ENSG00000133134.11_5	BEX2	20.4795	0	23.7761	3.619
ENSG00000170289.12_3	CNGB3	1.8103	0	2.7417	0.3586
ENSG00000239620.2_5	PRR20G	0.0287	0	0.076	0.0284
ENSG00000139780.7_2	METTL21C	0.0286	0	0	0.0283
ENSG00000187889.13_6	FYB2	1.0957	0	0.0433	0.0648
ENSG00000175093.5_3	SPSB4	1.0968	0	0.0531	0
ENSG00000125999.11_4	BPIFB1	1.8026	0	0.0377	0
ENSG00000132698.15_4	RAB25	1.0974	0	54.8798	7.1545
ENSG00000186684.14_4	CYP27C1	0.0283	0	0.0187	0.014
ENSG00000170703.15_2	TTLL6	1.0982	0	0	0
ENSG00000162669.16_3	HFM1	1.0996	0	0.5942	0.127
ENSG00000104332.12_4	SFRP1	3.8175	0	0.0494	0
ENSG00000134716.11_4	CYP2J2	1.1021	0	2.619	0.4151
ENSG00000141255.12_5	SPATA22	0.0282	0	0	0
ENSG00000163518.11_3	FCRL4	0.0281	0	0.0093	0
ENSG00000113212.7_3	PCDHB7	1.1073	0	0.0331	0
ENSG00000277288.4_6	C10orf142	0.0281	0	0	0
ENSG00000132744.8_3	ACY3	1.1082	0	0.6259	0.0535
ENSG00000145242.13_4	EPHA5	0.0278	0	0.0092	0.0046
ENSG00000103355.13_3	PRSS33	1.1088	0	0	0
ENSG00000186766.8_3	FOXI2	0.0191	0	0	0
ENSG00000177669.4_3	MBOAT4	0.0189	0	0.0501	0
ENSG00000109576.14_4	AADAT	3.5928	0	0.9198	0.2965
ENSG00000106031.9_6	HOXA13	0.0106	0	0	0
ENSG00000037965.6_4	HOXC8	1.6232	0	0.0767	0.0128
ENSG00000204970.9_4	PCDHA1	0.0114	0	0	0.0339
ENSG00000163914.5_3	RHO	0.0112	0	0.0149	0
ENSG00000150051.14_5	MKX	1.6204	0	1.0006	0.2407
ENSG00000175894.18_7	TSPEAR	0.0112	0	0.0074	0
ENSG00000233701.3_3	PRR23C	0.0112	0	0.0074	0
ENSG00000170484.10_4	KRT74	0.011	0	0	0
ENSG00000136883.14_4	KIF12	5.3375	0	29.9721	6.5495
ENSG00000131831.18_5	RAI2	10.0936	0	18.6265	3.0536
ENSG00000118733.16_2	OLFM3	0.0109	0	0	0
ENSG00000236320.3_2	SLFN14	0.0108	0	0	0.0107
ENSG00000094963.14_3	FMO2	44.8255	0	242.19	24.4552
ENSG00000179772.8_3	FOXS1	1.411	0	0.3639	0.1184
ENSG00000254221.2_3	PCDHGB1	1.6128	0	0.5164	0.1116
ENSG00000144227.5_3	NXPH2	0.0115	0	0.0304	0
ENSG00000101282.9_4	RSPO4	1.6106	0	1.4801	0.638
ENSG00000105696.9_5	TMEM59L	1.4215	0	0.0127	0.0571
ENSG00000168917.9_3	SLC35G2	1.4219	0	0.2326	0.0949
ENSG00000070193.4_3	FGF10	1.4239	0	0	0
ENSG00000206549.13_5	PRSS50	0.0105	0	0.0209	0
ENSG00000206549.13_5	PRSS50	0.0105	0	0.0209	0
ENSG00000206549.13_5	PRSS50	0.0105	0	0.0209	0
ENSG00000206549.13_5	PRSS50	0.0105	0	0.0209	0
ENSG00000206549.13_5	PRSS50	0.0105	0	0	0
ENSG00000206549.13_5	PRSS50	0.0105	0	0	0
ENSG00000206549.13_5	PRSS50	0.0105	0	0	0
ENSG00000206549.13_5	PRSS50	0.0105	0	0	0
ENSG00000206549.13_5	PRSS50	0.0105	0	0.0209	0
ENSG00000206549.13_5	PRSS50	0.0105	0	0.0209	0
ENSG00000206549.13_5	PRSS50	0.0105	0	0.0209	0
ENSG00000206549.13_5	PRSS50	0.0105	0	0.0209	0
ENSG00000206549.13_5	PRSS50	0.0105	0	0	0
ENSG00000206549.13_5	PRSS50	0.0105	0	0	0
ENSG00000206549.13_5	PRSS50	0.0105	0	0	0
ENSG00000206549.13_5	PRSS50	0.0105	0	0	0
ENSG00000283706.2_3	PRSS50	0	0	0.0209	0
ENSG00000283706.2_3	PRSS50	0	0	0.0209	0
ENSG00000283706.2_3	PRSS50	0	0	0.0209	0
ENSG00000283706.2_3	PRSS50	0	0	0.0209	0
ENSG00000283706.2_3	PRSS50	0	0	0	0
ENSG00000283706.2_3	PRSS50	0	0	0	0
ENSG00000283706.2_3	PRSS50	0	0	0	0
ENSG00000283706.2_3	PRSS50	0	0	0	0
ENSG00000283706.2_3	PRSS50	0	0	0.0209	0
ENSG00000283706.2_3	PRSS50	0	0	0.0209	0
ENSG00000283706.2_3	PRSS50	0	0	0.0209	0
ENSG00000283706.2_3	PRSS50	0	0	0.0209	0
ENSG00000283706.2_3	PRSS50	0	0	0	0
ENSG00000283706.2_3	PRSS50	0	0	0	0
ENSG00000283706.2_3	PRSS50	0	0	0	0
ENSG00000283706.2_3	PRSS50	0	0	0	0
ENSG00000133105.8_4	RXFP2	0.0103	0	0	0
ENSG00000185652.12_3	NTF3	1.4316	0	0.9768	0.6203
ENSG00000204983.14_3	PRSS1	1.4347	0	0.0513	0.0384
ENSG00000173406.15_4	DAB1	1.4351	0	0.9495	0.0536
ENSG00000178021.11_4	TSPYL6	0.0102	0	0	0
ENSG00000140835.9_2	CHST4	1.4406	0	1.1325	0.1271
ENSG00000222014.6_4	RAB6C	0.0101	0	0.0134	0
ENSG00000118729.11_2	CASQ2	1.3987	0	0.0142	0
ENSG00000120149.9_3	MSX2	1.3986	0	0.0609	0
ENSG00000172602.11_5	RND1	1.604	0	0.2022	0.0504
ENSG00000184454.7_4	NCMAP	1.3858	0	2.09	0.253
ENSG00000186377.8_3	CYP4X1	10.0466	0	4.8718	0.7468
ENSG00000213123.11_4	TCTEX1D2	1.6524	0	1.0592	0.1534
ENSG00000144460.12_3	NYAP2	0.0124	0	0.2132	0.0736
ENSG00000101438.4_3	SLC32A1	0.0122	0	0	0
ENSG00000203730.3_3	TEDDM1	0.0122	0	0	0
ENSG00000169302.16_4	STK32A	1.3538	0	5.3219	0.9464
ENSG00000186777.12_4	ZNF732	1.3628	0	1.3571	0.1636
ENSG00000184905.9_4	TCEAL2	1.365	0	0.6021	0
ENSG00000124557.12_2	BTN1A1	0.0121	0	0.008	0.0359
ENSG00000177212.4_4	OR2T33	0.012	0	0.0556	0.0595
ENSG00000188833.9_3	ENTPD8	1.3718	0	2.801	0.8326
ENSG00000140873.16_4	ADAMTS18	5.571	0	3.8507	0.0493
ENSG00000108379.10_3	WNT3	1.6388	0	3.6358	0.716
ENSG00000164099.3_3	PRSS12	3.6566	0	29.7815	6.2719
ENSG00000188269.9_4	OR7A5	0.0119	0	0.0079	0
ENSG00000185040.13_4	SPDYE16	0.012	0	0	0
ENSG00000124140.13_6	SLC12A5	1.3887	0	2.2264	0.7405
ENSG00000236761.6_4	CTAGE9	0.0121	0	0.04	0
ENSG00000244693.1_5	CTAGE8	0.012	0	0.0557	0.0119
ENSG00000124440.15_2	HIF3A	1.3893	0	24.6592	6.5801
ENSG00000271079.1_4	CTAGE15	0.012	0	0.0159	0.0119
ENSG00000243978.8_6	RTL9	0.0119	0	0	0.0059
ENSG00000069018.18_3	TRPC7	0.0118	0	0.0549	0.0117
ENSG00000100170.10_3	SLC5A1	3.6679	0	1.7367	0.611
ENSG00000197584.12_6	KCNMB2	1.636	0	0.0361	0
ENSG00000167332.9_6	OR51E2	0.0119	0	0	0
ENSG00000141052.17_2	MYOCD	1.3928	0	0.0073	0
ENSG00000111339.12_5	ART4	1.3958	0	0.1421	0
ENSG00000258484.4_4	SPESP1	1.6045	0	0.0332	0
ENSG00000204544.5_4	MUC21	0.0101	0	0.4802	0.02
ENSG00000133863.8_4	TEX15	0.0124	0	0.4988	0.1163
ENSG00000286237.1_1	ARMCX5-GPRASP2	0.0056	0	0.0037	0
ENSG00000007933.13_4	FMO3	5.3769	0	0.3717	0.0397
ENSG00000188089.13_2	PLA2G4E	0.0077	0	0.0051	0.0076
ENSG00000174567.8_3	GOLT1A	1.5006	0	1.8794	0.69
ENSG00000173269.14_6	MMRN2	43.3828	0	2.3361	0.4836
ENSG00000174358.16_3	SLC6A19	0.0073	0	0.0048	0
ENSG00000134760.6_3	DSG1	0.0069	0	0.2323	0.0204
ENSG00000176194.18_3	CIDEA	5.4104	0	0	0
ENSG00000175065.12_4	DSG4	0.0068	0	0.0091	0
ENSG00000174667.4_4	OR7D4	0.0063	0	0	0
ENSG00000151365.2_3	THRSP	1.5118	0	0.7722	0.1839
ENSG00000206043.7_3	C18orf63	0.0061	0	0	0
ENSG00000178235.7_2	SLITRK1	0.006	0	0	0
ENSG00000113248.6_4	PCDHB15	3.7141	0	0.272	0.095
ENSG00000113262.16_4	GRM6	0.0054	0	0.0036	0
ENSG00000256870.3_3	SLC5A8	0.0078	0	0.0051	0
ENSG00000072315.3_2	TRPC5	0.0053	0	0	0
ENSG00000181333.12_4	HEPHL1	0.0054	0	0.0922	0
ENSG00000163217.2_3	BMP10	0.0052	0	0.0102	0
ENSG00000111432.4_3	FZD10	1.5559	0	1.8832	0.1691
ENSG00000131097.7_3	HIGD1B	1.5238	0	0	0
ENSG00000171587.15_4	DSCAM	0.005	0	0.0234	0
ENSG00000169933.15_4	FRMPD4	0.0049	0	0	0
ENSG00000205176.2	REXO1L1	0.0044	0	0	0
ENSG00000154478.4_3	GPR26	0.003	0	0.004	0
ENSG00000165816.13_4	VWA2	1.5271	0	6.0267	1.3836
ENSG00000100053.10_3	CRYBB3	1.5398	0	0.5094	0.4236
ENSG00000091482.8_5	SMPX	1.5427	0	0.0537	0.0804
ENSG00000180934.6_3	OR56A1	1.5465	0	0.2759	0.1119
ENSG00000117598.13_4	PLPPR5	0.0077	0	0	0.0076
ENSG00000179270.7_4	PCARE	0.0079	0	0.0105	0
ENSG00000070031.4_3	SCT	1.5983	0	0.1958	0.0586
ENSG00000054179.12_4	ENTPD2	5.4449	0	1.7169	0.1264
ENSG00000139220.16_4	PPFIA2	3.6985	0	0.0699	0
ENSG00000204033.9_4	LRIT2	0.01	0	0	0
ENSG00000125998.8_3	FAM83C	0.0098	0	0	0
ENSG00000198768.11_5	APCDD1L	1.5918	0	1.6698	0.1538
ENSG00000134443.10_5	GRP	1.5902	0	0	0
ENSG00000156564.9_4	LRFN2	0.0098	0	0	0
ENSG00000145832.14_5	SLC25A48	1.4478	0	0.0787	0.0393
ENSG00000177324.14_4	BEND2	0.0095	0	0	0
ENSG00000198173.4_3	FAM47C	0.0095	0	0	0
ENSG00000175497.16_4	DPP10	1.5869	0	0.28	0.0349
ENSG00000248144.6_5	ADH1C	1.4583	0	0	0
ENSG00000204701.2_4	OR2J3	0.0094	0	0.0062	0
ENSG00000221818.9_3	EBF2	1.4605	0	0	0
ENSG00000047662.5_3	FAM184B	0.0093	0	0.052	0.0046
ENSG00000214338.10_6	SOGA3	0.0083	0	0	0
ENSG00000227051.6_3	C14orf132	43.8635	0	20.2634	3.8777
ENSG00000233670.7_4	PIRT	0.009	0	0	0
ENSG00000165409.17_4	TSHR	1.4659	0	1.2375	0.3004
ENSG00000285901.1_1	AC008012.1	0.0091	0	0	0
ENSG00000130876.11_3	SLC7A10	1.4696	0	0.1691	0.1476
ENSG00000157399.15_6	ARSE	1.4775	0	0	0
ENSG00000186007.10_5	LEMD1	5.4301	0	8.3926	1.1343
ENSG00000146039.11_4	SLC17A4	0.0087	0	0.0058	0.0086
ENSG00000183090.5_3	FREM3	0.0087	0	0.0347	0
ENSG00000174236.4_3	REP15	1.5704	0	0.8958	0.5095
ENSG00000143185.4_3	XCL2	1.496	0	2.5295	0.823
ENSG00000100218.12_3	RSPH14	1.4999	0	1.1115	0.1188
ENSG00000134588.12_3	USP26	0.0085	0	0	0
ENSG00000198074.10_3	AKR1B10	1.6602	0	0.8573	0.0401
ENSG00000124333.16_3	VAMP7	46.2089	0	147.657	0
ENSG00000124333.16_3	VAMP7	46.2089	0	147.657	0
ENSG00000124333.16_3	VAMP7	46.2089	0	147.657	70.7231
ENSG00000124333.16_3	VAMP7	46.2089	0	147.657	70.7231
ENSG00000124333.16_3	VAMP7	46.2089	0	0	70.7231
ENSG00000124333.16_3	VAMP7	46.2089	0	0	70.7231
ENSG00000124333.16_3	VAMP7	46.2089	0	0	0
ENSG00000124333.16_3	VAMP7	46.2089	0	0	0
ENSG00000124333.16_3	VAMP7	46.2089	46.6145	147.657	0
ENSG00000124333.16_3	VAMP7	46.2089	46.6145	147.657	0
ENSG00000124333.16_3	VAMP7	46.2089	46.6145	147.657	70.7231
ENSG00000124333.16_3	VAMP7	46.2089	46.6145	147.657	70.7231
ENSG00000124333.16_3	VAMP7	46.2089	46.6145	0	70.7231
ENSG00000124333.16_3	VAMP7	46.2089	46.6145	0	70.7231
ENSG00000124333.16_3	VAMP7	46.2089	46.6145	0	0
[truncated: 19,256 more rows]
